# Supplementary material
Source: publisher figshare collection journal article supplement (https://acs.figshare.com/ndownloader/files/7895926)
Supplement: Supplementary file 1 [file 7895926]

data_vir1
_audit_creation_date              2017-03-17
_audit_creation_method
;
Olex2 1.2
(compiled 2017.03.02 svn.r3394 for OlexSys, GUI svn.r5324)
;
_shelx_SHELXL_version_number      '2014/7'
loop_
  _publ_author_name
  _publ_author_email
  _publ_author_address
 'ROLLAND, M.' marc.rolland@univ-montp2.fr
;
Universit\'e de Montpellier  
Montpellier
34000
France
;

_publ_contact_author_address
;
Universit\'e de Montpellier  
Montpellier
34000
France
;
_publ_contact_author_email        marc.rolland@univ-montp2.fr
_publ_contact_author_id_orcid     ''
_publ_contact_author_name         'ROLLAND, M.'
_publ_contact_author_phone        0467149127
_publ_requested_journal           Chem.-Eur.J.
_publ_section_references
;
Dolomanov, O.V., Bourhis, L.J., Gildea, R.J, Howard, J.A.K. & Puschmann, H.
 (2009), J. Appl. Cryst. 42, 339-341.

Sheldrick, G.M. (2015). Acta Cryst. A71, 3-8.

Sheldrick, G.M. (2015). Acta Cryst. C71, 3-8.
;
_chemical_name_common             ?
_chemical_name_systematic         ?
_chemical_formula_moiety          'C30 H22 Br2 O6 P2'
_chemical_formula_sum             'C30 H22 Br2 O6 P2'
_chemical_formula_weight          700.23
_chemical_melting_point           ?
_chemical_oxdiff_formula          'C1 H1 P1 O1 Si1'
loop_
  _atom_type_symbol
  _atom_type_description
  _atom_type_scat_dispersion_real
  _atom_type_scat_dispersion_imag
  _atom_type_scat_source
 'C' 'C' 0.0181 0.0091 'International Tables Vol C Tables 4.2.6.8 and 6.1.1.4'
 'H' 'H' 0.0000 0.0000 'International Tables Vol C Tables 4.2.6.8 and 6.1.1.4'
 'Br' 'Br' -0.6763 1.2805
 'International Tables Vol C Tables 4.2.6.8 and 6.1.1.4'
 'O' 'O' 0.0492 0.0322 'International Tables Vol C Tables 4.2.6.8 and 6.1.1.4'
 'P' 'P' 0.2955 0.4335 'International Tables Vol C Tables 4.2.6.8 and 6.1.1.4'

_shelx_space_group_comment
;
The symmetry employed for this shelxl refinement is uniquely defined
by the following loop, which should always be used as a source of
symmetry information in preference to the above space-group names.
They are only intended as comments.
;
_space_group_crystal_system       'orthorhombic'
_space_group_IT_number            54
_space_group_name_H-M_alt         'P c c a'
_space_group_name_Hall            '-P 2a 2ac'
loop_
  _space_group_symop_operation_xyz
 'x, y, z'
 '-x+1/2, -y, z'
 '-x, y, -z+1/2'
 'x+1/2, -y, -z+1/2'
 '-x, -y, -z'
 'x-1/2, y, -z'
 'x, -y, z-1/2'
 '-x-1/2, y, z-1/2'

_cell_length_a                    27.0189(6)
_cell_length_b                    14.0226(4)
_cell_length_c                    7.2637(2)
_cell_angle_alpha                 90
_cell_angle_beta                  90
_cell_angle_gamma                 90
_cell_volume                      2752.04(13)
_cell_formula_units_Z             4
_cell_measurement_reflns_used     6560
_cell_measurement_temperature     175.00(14)
_cell_measurement_theta_max       67.3170
_cell_measurement_theta_min       3.1280
_shelx_estimated_absorpt_T_max    ?
_shelx_estimated_absorpt_T_min    ?
_exptl_absorpt_coefficient_mu     5.217
_exptl_absorpt_correction_T_max   1.00000
_exptl_absorpt_correction_T_min   0.44163
_exptl_absorpt_correction_type    multi-scan
_exptl_absorpt_process_details
;
CrysAlisPro, Agilent Technologies,
Version 1.171.37.35 (release 13-08-2014 CrysAlis171 .NET)
(compiled Aug 13 2014,18:06:01)
Empirical absorption correction using spherical harmonics,
 implemented in SCALE3 ABSPACK scaling algorithm.
;
_exptl_absorpt_special_details    ?
_exptl_crystal_colour             colourless
_exptl_crystal_colour_primary     colourless
_exptl_crystal_density_diffrn     1.690
_exptl_crystal_density_meas       ?
_exptl_crystal_density_method     ?
_exptl_crystal_description        prism
_exptl_crystal_F_000              1400
_exptl_crystal_size_max           0.03
_exptl_crystal_size_mid           0.02
_exptl_crystal_size_min           0.01
_exptl_transmission_factor_max    ?
_exptl_transmission_factor_min    ?
_diffrn_reflns_av_R_equivalents   0.1683
_diffrn_reflns_av_unetI/netI      0.0505
_diffrn_reflns_Laue_measured_fraction_full 1.000
_diffrn_reflns_Laue_measured_fraction_max 0.998
_diffrn_reflns_limit_h_max        32
_diffrn_reflns_limit_h_min        -32
_diffrn_reflns_limit_k_max        16
_diffrn_reflns_limit_k_min        -15
_diffrn_reflns_limit_l_max        8
_diffrn_reflns_limit_l_min        -8
_diffrn_reflns_number             51749
_diffrn_reflns_point_group_measured_fraction_full 1.000
_diffrn_reflns_point_group_measured_fraction_max 0.998
_diffrn_reflns_theta_full         67.684
_diffrn_reflns_theta_max          68.058
_diffrn_reflns_theta_min          3.152
_diffrn_ambient_environment       N~2~
_diffrn_ambient_temperature       175.00(14)
_diffrn_detector                  'CCD plate'
_diffrn_detector_area_resol_mean  16.0143
_diffrn_detector_type             Sapphire3
_diffrn_measured_fraction_theta_full 1.000
_diffrn_measured_fraction_theta_max 0.998
_diffrn_measurement_details
;
#__ type_ start__ end____ width___ exp.time_
  1 omega -108.00  -34.00   1.0000    2.0000
omega____ theta____ kappa____ phi______ frames
    -      -33.5000 -179.0000  120.0000 74

#__ type_ start__ end____ width___ exp.time_
  2 omega  -62.00   36.00   1.0000    2.0000
omega____ theta____ kappa____ phi______ frames
    -      -33.5000   77.0000  -30.0000 98

#__ type_ start__ end____ width___ exp.time_
  3 omega  -52.00   35.00   1.0000    2.0000
omega____ theta____ kappa____ phi______ frames
    -      -33.5000   57.0000  150.0000 87

#__ type_ start__ end____ width___ exp.time_
  4 omega -108.00  -34.00   1.0000    2.0000
omega____ theta____ kappa____ phi______ frames
    -      -33.5000 -179.0000  -30.0000 74

#__ type_ start__ end____ width___ exp.time_
  5 omega   13.00  106.00   1.0000    2.0000
omega____ theta____ kappa____ phi______ frames
    -       35.6315   38.0000  120.0000 93

#__ type_ start__ end____ width___ exp.time_
  6 omega   17.00  104.00   1.0000    2.0000
omega____ theta____ kappa____ phi______ frames
    -       35.6315   57.0000  -30.0000 87

#__ type_ start__ end____ width___ exp.time_
  7 omega    7.00  105.00   1.0000    2.0000
omega____ theta____ kappa____ phi______ frames
    -       35.6315   77.0000 -180.0000 98

#__ type_ start__ end____ width___ exp.time_
  8 omega    7.00  105.00   1.0000    2.0000
omega____ theta____ kappa____ phi______ frames
    -       35.6315   77.0000  120.0000 98

#__ type_ start__ end____ width___ exp.time_
  9 omega    7.00  105.00   1.0000    2.0000
omega____ theta____ kappa____ phi______ frames
    -       35.6315   77.0000    0.0000 98

#__ type_ start__ end____ width___ exp.time_
 10 omega    7.00  105.00   1.0000    2.0000
omega____ theta____ kappa____ phi______ frames
    -       35.6315   77.0000 -120.0000 98

#__ type_ start__ end____ width___ exp.time_
 11 omega   17.00  104.00   1.0000    2.0000
omega____ theta____ kappa____ phi______ frames
    -       35.6315   57.0000  -90.0000 87

#__ type_ start__ end____ width___ exp.time_
 12 omega   -4.00   76.00   1.0000    2.0000
omega____ theta____ kappa____ phi______ frames
    -       35.6315  -99.0000 -180.0000 80

#__ type_ start__ end____ width___ exp.time_
 13 omega   53.00  110.00   1.0000    2.0000
omega____ theta____ kappa____ phi______ frames
    -       35.6315 -179.0000  150.0000 57

#__ type_ start__ end____ width___ exp.time_
 14 omega    7.00  105.00   1.0000    2.0000
omega____ theta____ kappa____ phi______ frames
    -       35.6315   77.0000   60.0000 98

#__ type_ start__ end____ width___ exp.time_
 15 omega   56.00  110.00   1.0000    2.0000
omega____ theta____ kappa____ phi______ frames
    -       35.6315  179.0000   30.0000 54

#__ type_ start__ end____ width___ exp.time_
 16 omega   80.00  168.00   1.0000    5.0000
omega____ theta____ kappa____ phi______ frames
    -      100.0000   61.0000 -180.0000 88

#__ type_ start__ end____ width___ exp.time_
 17 omega   71.00  169.00   1.0000    5.0000
omega____ theta____ kappa____ phi______ frames
    -      100.0000   77.0000   30.0000 98

#__ type_ start__ end____ width___ exp.time_
 18 omega   80.00  168.00   1.0000    5.0000
omega____ theta____ kappa____ phi______ frames
    -      100.0000   61.0000  120.0000 88

#__ type_ start__ end____ width___ exp.time_
 19 omega   71.00  169.00   1.0000    5.0000
omega____ theta____ kappa____ phi______ frames
    -      100.0000   77.0000  150.0000 98

#__ type_ start__ end____ width___ exp.time_
 20 omega   71.00  169.00   1.0000    5.0000
omega____ theta____ kappa____ phi______ frames
    -      100.0000   77.0000  120.0000 98

#__ type_ start__ end____ width___ exp.time_
 21 omega   74.00  171.00   1.0000    5.0000
omega____ theta____ kappa____ phi______ frames
    -      100.0000   30.0000  -60.0000 97

#__ type_ start__ end____ width___ exp.time_
 22 omega   30.00  109.00   1.0000    5.0000
omega____ theta____ kappa____ phi______ frames
    -      100.0000  -95.0000   30.0000 79

#__ type_ start__ end____ width___ exp.time_
 23 omega   80.00  168.00   1.0000    5.0000
omega____ theta____ kappa____ phi______ frames
    -      100.0000   61.0000   90.0000 88

#__ type_ start__ end____ width___ exp.time_
 24 omega   71.00  169.00   1.0000    5.0000
omega____ theta____ kappa____ phi______ frames
    -      100.0000   77.0000  -60.0000 98

#__ type_ start__ end____ width___ exp.time_
 25 omega   71.00  169.00   1.0000    5.0000
omega____ theta____ kappa____ phi______ frames
    -      100.0000   77.0000   90.0000 98

#__ type_ start__ end____ width___ exp.time_
 26 omega   71.00  169.00   1.0000    5.0000
omega____ theta____ kappa____ phi______ frames
    -      100.0000   77.0000   60.0000 98

#__ type_ start__ end____ width___ exp.time_
 27 omega   30.00  109.00   1.0000    5.0000
omega____ theta____ kappa____ phi______ frames
    -      100.0000  -95.0000  150.0000 79

#__ type_ start__ end____ width___ exp.time_
 28 omega   71.00  169.00   1.0000    5.0000
omega____ theta____ kappa____ phi______ frames
    -      100.0000   77.0000    0.0000 98

#__ type_ start__ end____ width___ exp.time_
 29 omega   30.00  109.00   1.0000    5.0000
omega____ theta____ kappa____ phi______ frames
    -      100.0000  -95.0000   90.0000 79

#__ type_ start__ end____ width___ exp.time_
 30 omega   80.00  168.00   1.0000    5.0000
omega____ theta____ kappa____ phi______ frames
    -      100.0000   61.0000  -90.0000 88

#__ type_ start__ end____ width___ exp.time_
 31 omega   80.00  168.00   1.0000    5.0000
omega____ theta____ kappa____ phi______ frames
    -      100.0000   61.0000  150.0000 88

#__ type_ start__ end____ width___ exp.time_
 32 omega   80.00  168.00   1.0000    5.0000
omega____ theta____ kappa____ phi______ frames
    -      100.0000   61.0000  -60.0000 88

#__ type_ start__ end____ width___ exp.time_
 33 omega   80.00  168.00   1.0000    5.0000
omega____ theta____ kappa____ phi______ frames
    -      100.0000   61.0000   60.0000 88

#__ type_ start__ end____ width___ exp.time_
 34 omega   30.00  109.00   1.0000    5.0000
omega____ theta____ kappa____ phi______ frames
    -      100.0000  -95.0000  -90.0000 79

#__ type_ start__ end____ width___ exp.time_
 35 omega   80.00  168.00   1.0000    5.0000
omega____ theta____ kappa____ phi______ frames
    -      100.0000   61.0000   30.0000 88

#__ type_ start__ end____ width___ exp.time_
 36 omega   71.00  169.00   1.0000    5.0000
omega____ theta____ kappa____ phi______ frames
    -      100.0000   77.0000 -180.0000 98

#__ type_ start__ end____ width___ exp.time_
 37 omega   80.00  168.00   1.0000    5.0000
omega____ theta____ kappa____ phi______ frames
    -      100.0000   61.0000    0.0000 88

#__ type_ start__ end____ width___ exp.time_
 38 omega   80.00  168.00   1.0000    5.0000
omega____ theta____ kappa____ phi______ frames
    -      100.0000   61.0000  -30.0000 88

#__ type_ start__ end____ width___ exp.time_
 39 omega   71.00  169.00   1.0000    5.0000
omega____ theta____ kappa____ phi______ frames
    -      100.0000   77.0000  -90.0000 98

#__ type_ start__ end____ width___ exp.time_
 40 omega   80.00  168.00   1.0000    5.0000
omega____ theta____ kappa____ phi______ frames
    -      100.0000   61.0000 -120.0000 88

#__ type_ start__ end____ width___ exp.time_
 41 omega   71.00  169.00   1.0000    5.0000
omega____ theta____ kappa____ phi______ frames
    -      100.0000   77.0000  -30.0000 98

#__ type_ start__ end____ width___ exp.time_
 42 omega   71.00  169.00   1.0000    5.0000
omega____ theta____ kappa____ phi______ frames
    -      100.0000   77.0000 -150.0000 98

#__ type_ start__ end____ width___ exp.time_
 43 omega   71.00  169.00   1.0000    5.0000
omega____ theta____ kappa____ phi______ frames
    -      100.0000   77.0000 -120.0000 98

#__ type_ start__ end____ width___ exp.time_
 44 omega   29.00  115.00   1.0000    5.0000
omega____ theta____ kappa____ phi______ frames
    -      100.0000 -112.0000    0.0000 86

#__ type_ start__ end____ width___ exp.time_
 45 omega   31.00  129.00   1.0000    5.0000
omega____ theta____ kappa____ phi______ frames
    -      100.0000  -77.0000 -180.0000 98

#__ type_ start__ end____ width___ exp.time_
 46 omega   74.00  155.00   1.0000    5.0000
omega____ theta____ kappa____ phi______ frames
    -      100.0000   72.0000 -122.9193 81
;
_diffrn_measurement_device        'four-circle diffractometer'
_diffrn_measurement_device_type   'Xcalibur, Sapphire3, Gemini'
_diffrn_measurement_method        '\w scans'
_diffrn_orient_matrix_UB_11       -0.0484132000
_diffrn_orient_matrix_UB_12       0.0203184000
_diffrn_orient_matrix_UB_13       -0.1049655000
_diffrn_orient_matrix_UB_21       0.0252226000
_diffrn_orient_matrix_UB_22       -0.0289280000
_diffrn_orient_matrix_UB_23       -0.1817885000
_diffrn_orient_matrix_UB_31       -0.0164833000
_diffrn_orient_matrix_UB_32       -0.1040191000
_diffrn_orient_matrix_UB_33       0.0301360000
_diffrn_radiation_monochromator   graphite
_diffrn_radiation_probe           x-ray
_diffrn_radiation_type            CuK\a
_diffrn_radiation_wavelength      1.54184
_diffrn_source                    'Enhance (Cu) X-ray Source'
_reflns_Friedel_coverage          0.000
_reflns_Friedel_fraction_full     .
_reflns_Friedel_fraction_max      .
_reflns_number_gt                 1891
_reflns_number_total              2514
_reflns_odcompleteness_completeness 99.96
_reflns_odcompleteness_iscentric  1
_reflns_odcompleteness_theta      64.99
_reflns_special_details
;
 Reflections were merged by SHELXL according to the crystal
 class for the calculation of statistics and refinement.
 
 _reflns_Friedel_fraction is defined as the number of unique
 Friedel pairs measured divided by the number that would be
 possible theoretically, ignoring centric projections and
 systematic absences.
;
_reflns_threshold_expression      'I > 2\s(I)'
_computing_cell_refinement
;
CrysAlisPro, Agilent Technologies,
Version 1.171.37.35 (release 13-08-2014 CrysAlis171 .NET)
(compiled Aug 13 2014,18:06:01)
;
_computing_data_collection
;
CrysAlisPro, Agilent Technologies,
Version 1.171.37.35 (release 13-08-2014 CrysAlis171 .NET)
(compiled Aug 13 2014,18:06:01)
;
_computing_data_reduction
;
CrysAlisPro, Agilent Technologies,
Version 1.171.37.35 (release 13-08-2014 CrysAlis171 .NET)
(compiled Aug 13 2014,18:06:01)
;
_computing_molecular_graphics     'Olex2 (Dolomanov et al., 2009)'
_computing_publication_material   'Olex2 (Dolomanov et al., 2009)'
_computing_structure_refinement   'ShelXL (Sheldrick, 2015)'
_computing_structure_solution     'ShelXT (Sheldrick, 2015)'
_refine_diff_density_max          1.810
_refine_diff_density_min          -0.668
_refine_diff_density_rms          0.125
_refine_ls_extinction_coef        .
_refine_ls_extinction_method      none
_refine_ls_goodness_of_fit_ref    1.015
_refine_ls_hydrogen_treatment     constr
_refine_ls_matrix_type            full
_refine_ls_number_parameters      182
_refine_ls_number_reflns          2514
_refine_ls_number_restraints      0
_refine_ls_R_factor_all           0.0740
_refine_ls_R_factor_gt            0.0558
_refine_ls_restrained_S_all       1.015
_refine_ls_shift/su_max           0.001
_refine_ls_shift/su_mean          0.000
_refine_ls_structure_factor_coef  Fsqd
_refine_ls_weighting_details
'w=1/[\s^2^(Fo^2^)+(0.1045P)^2^+1.0810P] where P=(Fo^2^+2Fc^2^)/3'
_refine_ls_weighting_scheme       calc
_refine_ls_wR_factor_gt           0.1473
_refine_ls_wR_factor_ref          0.1680
_refine_special_details           ?
_olex2_refinement_description
;
1. Fixed Uiso
 At 1.2 times of:
  All C(H) groups
 At 1.5 times of:
  All O(H) groups
2.a Aromatic/amide H refined with riding coordinates:
 C009(H009), C00B(H00B), C00D(H00D), C00E(H00E), C00F(H00F), C00G(H00G),
 C00H(H00H), C00I(H00I), C00J(H00J), C00K(H00K)
2.b Idealised tetrahedral OH refined as rotating group:
 O003(H003)
;
_atom_sites_solution_hydrogens    geom
_atom_sites_solution_primary      dual
_atom_sites_solution_secondary    ?
loop_
  _atom_site_label
  _atom_site_type_symbol
  _atom_site_fract_x
  _atom_site_fract_y
  _atom_site_fract_z
  _atom_site_U_iso_or_equiv
  _atom_site_adp_type
  _atom_site_occupancy
  _atom_site_site_symmetry_order
  _atom_site_calc_flag
  _atom_site_refinement_flags_posn
  _atom_site_refinement_flags_adp
  _atom_site_refinement_flags_occupancy
  _atom_site_disorder_assembly
  _atom_site_disorder_group
 Br01 Br 0.54049(2) 0.17893(4) 0.50131(7) 0.0474(3) Uani 1 1 d . . . . .
 P002 P 0.56144(4) 0.40452(8) 0.09232(14) 0.0326(3) Uani 1 1 d . . . . .
 O003 O 0.55306(12) 0.3747(2) -0.1069(4) 0.0397(7) Uani 1 1 d . . . . .
 H003 H 0.5499 0.4236 -0.1729 0.060 Uiso 1 1 calc GR . . . .
 O004 O 0.55589(11) 0.5077(2) 0.1267(4) 0.0387(7) Uani 1 1 d . . . . .
 O005 O 0.61432(10) 0.3633(2) 0.1517(4) 0.0366(7) Uani 1 1 d . . . . .
 C006 C 0.64407(16) 0.3164(3) 0.4517(6) 0.0363(10) Uani 1 1 d . . . . .
 C007 C 0.52689(16) 0.3263(3) 0.2399(6) 0.0347(10) Uani 1 1 d . . . . .
 C008 C 0.61389(15) 0.2856(3) 0.2838(6) 0.0361(10) Uani 1 1 d . . . . .
 C009 C 0.65814(16) 0.2491(4) 0.5843(6) 0.0418(11) Uani 1 1 d . . . . .
 H009 H 0.6477 0.1846 0.5732 0.050 Uiso 1 1 calc R . . . .
 C00A C 0.55923(15) 0.2717(3) 0.3292(6) 0.0344(9) Uani 1 1 d . . . . .
 C00B C 0.65922(18) 0.4091(4) 0.4713(6) 0.0406(11) Uani 1 1 d . . . . .
 H00B H 0.6490 0.4556 0.3841 0.049 Uiso 1 1 calc R . . . .
 C00C C 0.63637(17) 0.1982(3) 0.1853(6) 0.0384(10) Uani 1 1 d . . . . .
 C00D C 0.68694(18) 0.1815(4) 0.1937(6) 0.0418(11) Uani 1 1 d . . . . .
 H00D H 0.7074 0.2217 0.2665 0.050 Uiso 1 1 calc R . . . .
 C00E C 0.68937(17) 0.4356(4) 0.6174(7) 0.0480(12) Uani 1 1 d . . . . .
 H00E H 0.7003 0.4998 0.6278 0.058 Uiso 1 1 calc R . . . .
 C00F C 0.68715(18) 0.2767(4) 0.7307(7) 0.0476(12) Uani 1 1 d . . . . .
 H00F H 0.6961 0.2313 0.8219 0.057 Uiso 1 1 calc R . . . .
 C00G C 0.70778(19) 0.1067(4) 0.0969(7) 0.0497(13) Uani 1 1 d . . . . .
 H00G H 0.7425 0.0962 0.1028 0.060 Uiso 1 1 calc R . . . .
 C00H C 0.70345(19) 0.3696(4) 0.7469(7) 0.0521(13) Uani 1 1 d . . . . .
 H00H H 0.7242 0.3876 0.8466 0.063 Uiso 1 1 calc R . . . .
 C00I C 0.6072(2) 0.1394(4) 0.0763(7) 0.0504(12) Uani 1 1 d . . . . .
 H00I H 0.5726 0.1505 0.0672 0.060 Uiso 1 1 calc R . . . .
 C00J C 0.6784(2) 0.0472(4) -0.0083(6) 0.0529(14) Uani 1 1 d . . . . .
 H00J H 0.6925 -0.0052 -0.0728 0.064 Uiso 1 1 calc R . . . .
 C00K C 0.6283(2) 0.0654(5) -0.0179(7) 0.0585(15) Uani 1 1 d . . . . .
 H00K H 0.6080 0.0256 -0.0918 0.070 Uiso 1 1 calc R . . . .

loop_
  _atom_site_aniso_label
  _atom_site_aniso_U_11
  _atom_site_aniso_U_22
  _atom_site_aniso_U_33
  _atom_site_aniso_U_23
  _atom_site_aniso_U_13
  _atom_site_aniso_U_12
 Br01 0.0421(4) 0.0534(4) 0.0467(4) 0.0185(2) 0.00273(19) -0.0001(2)
 P002 0.0344(6) 0.0360(7) 0.0274(5) -0.0005(5) -0.0008(4) 0.0007(4)
 O003 0.0482(16) 0.0427(19) 0.0283(14) 0.0008(14) -0.0031(13) 0.0045(15)
 O004 0.0400(15) 0.0410(18) 0.0351(15) -0.0009(14) -0.0003(12) -0.0008(14)
 O005 0.0349(15) 0.0412(18) 0.0338(14) 0.0061(14) -0.0004(12) -0.0012(13)
 C006 0.031(2) 0.041(3) 0.037(2) 0.001(2) 0.0010(18) 0.0049(18)
 C007 0.037(2) 0.039(3) 0.029(2) -0.0030(19) 0.0010(17) -0.0030(18)
 C008 0.035(2) 0.042(3) 0.032(2) 0.004(2) 0.0019(17) 0.0018(19)
 C009 0.042(2) 0.049(3) 0.035(2) 0.002(2) 0.0005(18) 0.006(2)
 C00A 0.041(2) 0.030(2) 0.032(2) 0.0013(18) -0.0002(17) 0.0008(18)
 C00B 0.043(2) 0.042(3) 0.037(2) 0.000(2) 0.0070(19) -0.001(2)
 C00C 0.045(2) 0.041(3) 0.028(2) 0.0031(19) 0.0038(18) -0.003(2)
 C00D 0.044(2) 0.046(3) 0.036(2) -0.001(2) 0.0027(18) 0.008(2)
 C00E 0.043(2) 0.057(3) 0.044(3) -0.010(2) 0.002(2) -0.004(2)
 C00F 0.051(3) 0.061(4) 0.032(2) 0.002(2) -0.0029(19) 0.007(2)
 C00G 0.053(3) 0.056(3) 0.040(2) 0.003(3) 0.008(2) 0.016(2)
 C00H 0.045(3) 0.076(4) 0.035(2) -0.005(3) -0.006(2) 0.003(3)
 C00I 0.053(3) 0.049(3) 0.050(3) -0.009(3) -0.007(2) 0.001(2)
 C00J 0.077(4) 0.041(3) 0.041(3) -0.001(2) 0.008(2) 0.013(3)
 C00K 0.070(4) 0.051(4) 0.055(3) -0.013(3) -0.001(2) -0.001(3)

_geom_special_details
;
 All esds (except the esd in the dihedral angle between two l.s. planes)
 are estimated using the full covariance matrix.  The cell esds are taken
 into account individually in the estimation of esds in distances, angles
 and torsion angles; correlations between esds in cell parameters are only
 used when they are defined by crystal symmetry.  An approximate (isotropic)
 treatment of cell esds is used for estimating esds involving l.s. planes.
;
loop_
  _geom_bond_atom_site_label_1
  _geom_bond_atom_site_label_2
  _geom_bond_distance
  _geom_bond_site_symmetry_2
  _geom_bond_publ_flag
 Br01 C00A 1.874(4) . ?
 P002 O003 1.523(3) . ?
 P002 O004 1.476(3) . ?
 P002 O005 1.600(3) . ?
 P002 C007 1.795(4) . ?
 O003 H003 0.8400 . ?
 O005 C008 1.453(5) . ?
 C006 C008 1.529(6) . ?
 C006 C009 1.402(7) . ?
 C006 C00B 1.369(7) . ?
 C007 C007 1.460(9) 3_655 ?
 C007 C00A 1.330(6) . ?
 C008 C00A 1.525(6) . ?
 C008 C00C 1.544(6) . ?
 C009 H009 0.9500 . ?
 C009 C00F 1.377(7) . ?
 C00B H00B 0.9500 . ?
 C00B C00E 1.389(7) . ?
 C00C C00D 1.388(7) . ?
 C00C C00I 1.388(7) . ?
 C00D H00D 0.9500 . ?
 C00D C00G 1.382(7) . ?
 C00E H00E 0.9500 . ?
 C00E C00H 1.374(8) . ?
 C00F H00F 0.9500 . ?
 C00F C00H 1.379(8) . ?
 C00G H00G 0.9500 . ?
 C00G C00J 1.382(8) . ?
 C00H H00H 0.9500 . ?
 C00I H00I 0.9500 . ?
 C00I C00K 1.367(8) . ?
 C00J H00J 0.9500 . ?
 C00J C00K 1.380(9) . ?
 C00K H00K 0.9500 . ?

loop_
  _geom_angle_atom_site_label_1
  _geom_angle_atom_site_label_2
  _geom_angle_atom_site_label_3
  _geom_angle
  _geom_angle_site_symmetry_1
  _geom_angle_site_symmetry_3
  _geom_angle_publ_flag
 O003 P002 O005 106.84(17) . . ?
 O003 P002 C007 108.8(2) . . ?
 O004 P002 O003 114.50(18) . . ?
 O004 P002 O005 113.51(17) . . ?
 O004 P002 C007 116.43(19) . . ?
 O005 P002 C007 94.75(18) . . ?
 P002 O003 H003 109.5 . . ?
 C008 O005 P002 116.2(2) . . ?
 C009 C006 C008 120.1(4) . . ?
 C00B C006 C008 120.7(4) . . ?
 C00B C006 C009 119.1(5) . . ?
 C007 C007 P002 125.3(3) 3_655 . ?
 C00A C007 P002 107.5(3) . . ?
 C00A C007 C007 127.2(4) . 3_655 ?
 O005 C008 C006 108.1(4) . . ?
 O005 C008 C00A 104.2(3) . . ?
 O005 C008 C00C 106.6(3) . . ?
 C006 C008 C00C 112.6(4) . . ?
 C00A C008 C006 112.4(3) . . ?
 C00A C008 C00C 112.3(4) . . ?
 C006 C009 H009 120.2 . . ?
 C00F C009 C006 119.7(5) . . ?
 C00F C009 H009 120.2 . . ?
 C007 C00A Br01 123.2(3) . . ?
 C007 C00A C008 117.2(4) . . ?
 C008 C00A Br01 119.6(3) . . ?
 C006 C00B H00B 119.7 . . ?
 C006 C00B C00E 120.6(5) . . ?
 C00E C00B H00B 119.7 . . ?
 C00D C00C C008 120.0(4) . . ?
 C00D C00C C00I 118.9(5) . . ?
 C00I C00C C008 120.8(4) . . ?
 C00C C00D H00D 119.8 . . ?
 C00G C00D C00C 120.4(5) . . ?
 C00G C00D H00D 119.8 . . ?
 C00B C00E H00E 119.8 . . ?
 C00H C00E C00B 120.3(5) . . ?
 C00H C00E H00E 119.8 . . ?
 C009 C00F H00F 119.6 . . ?
 C009 C00F C00H 120.9(5) . . ?
 C00H C00F H00F 119.6 . . ?
 C00D C00G H00G 119.8 . . ?
 C00J C00G C00D 120.4(5) . . ?
 C00J C00G H00G 119.8 . . ?
 C00E C00H C00F 119.3(5) . . ?
 C00E C00H H00H 120.3 . . ?
 C00F C00H H00H 120.3 . . ?
 C00C C00I H00I 120.0 . . ?
 C00K C00I C00C 119.9(5) . . ?
 C00K C00I H00I 120.0 . . ?
 C00G C00J H00J 120.7 . . ?
 C00K C00J C00G 118.6(5) . . ?
 C00K C00J H00J 120.7 . . ?
 C00I C00K C00J 121.7(6) . . ?
 C00I C00K H00K 119.2 . . ?
 C00J C00K H00K 119.2 . . ?

loop_
  _refln_index_h
  _refln_index_k
  _refln_index_l
  _refln_F_squared_meas
  _refln_F_squared_sigma
 2 0 0 4226.53 74.02
 -2 0 0 3990.74 62.91
 -2 0 0 3846.59 70.63
 2 0 0 4149.65 57.05
 3 0 0 2.99 2.26
 -3 0 0 0.59 2.59
 3 0 0 1.31 1.78
 -3 0 0 0.65 1.05
 -3 0 0 1.42 0.72
 -4 0 0 594.62 40.09
 -4 0 0 492.12 27.8
 4 0 0 664.37 42.99
 -4 0 0 504.06 29.71
 4 0 0 602.43 43.76
 -5 0 0 1.77 3.07
 5 0 0 11.14 6.74
 -5 0 0 2.9 3.63
 -5 0 0 -0.26 4.08
 -6 0 0 278.43 33.4
 6 0 0 310.2 37.55
 -6 0 0 268.44 25
 -7 0 0 2.93 3.01
 -7 0 0 -3.69 6.37
 -8 0 0 5866.95 174.3
 -8 0 0 6867.18 143.53
 8 0 0 7038.22 222.78
 -8 0 0 6210.33 183.44
 9 0 0 -6.84 8.17
 -9 0 0 -0.84 4.38
 -9 0 0 2.98 3.33
 -9 0 0 -0.5 5.62
 9 0 0 14.11 12.18
 10 0 0 4070.99 182.63
 -10 0 0 3332.66 155.15
 10 0 0 4184.88 197.18
 -10 0 0 3030.17 142.47
 11 0 0 8.68 10.41
 11 0 0 3.32 11.53
 -11 0 0 3.4 6.09
 -11 0 0 -0.69 4.74
 -12 0 0 6640.19 242.62
 -12 0 0 6288.28 241.55
 12 0 0 7145.92 268.35
 12 0 0 7376.92 296.2
 13 0 0 -1.61 13.57
 -13 0 0 11.5 13.76
 13 0 0 4.72 11.02
 -13 0 0 -2.21 5.72
 14 0 0 1254.47 124.52
 -14 0 0 1140.05 111.01
 14 0 0 1468.33 148.98
 -15 0 0 10.65 13.49
 15 0 0 -3.56 16.82
 15 0 0 12.61 21.27
 -16 0 0 173.07 46.05
 16 0 0 135.32 42.75
 16 0 0 186.15 55.93
 17 0 0 -0.6 14.83
 -17 0 0 6.28 7
 17 0 0 3.85 9.16
 18 0 0 246.47 66.13
 -18 0 0 158.27 50.42
 18 0 0 126.22 41.5
 19 0 0 -1.87 4.72
 19 0 0 7.31 11.85
 -19 0 0 2.79 3.92
 -19 0 0 7.17 6.5
 -19 0 0 -3.56 6.1
 -19 0 0 7.89 5.54
 -20 0 0 513.86 99.37
 -20 0 0 543.69 56.27
 20 0 0 480.11 62.49
 20 0 0 520.69 67.3
 -20 0 0 410.61 49.33
 -20 0 0 580.3 67.48
 -20 0 0 593.92 65.47
 20 0 0 425.64 80.85
 20 0 0 493.72 103.22
 -20 0 0 576.24 62.24
 20 0 0 383.7 68.48
 21 0 0 7.05 12.93
 21 0 0 6.95 14.23
 21 0 0 -4.74 8.86
 -21 0 0 0.83 8.24
 -21 0 0 -4.46 8.67
 21 0 0 4.11 3.04
 -21 0 0 -2.67 7.79
 21 0 0 0.16 6.85
 -21 0 0 5.78 3.14
 -21 0 0 5.44 8.68
 -22 0 0 24.97 13.47
 22 0 0 20.39 11.3
 -22 0 0 48.81 19.93
 22 0 0 12.49 6.85
 -22 0 0 17.17 9.08
 22 0 0 26.99 17.81
 -22 0 0 23.63 12.46
 -22 0 0 24.11 13.84
 22 0 0 27 18.58
 22 0 0 7.58 4.92
 23 0 0 -3.65 11.96
 -23 0 0 -3.21 8.14
 -23 0 0 3.41 3.72
 23 0 0 -8.43 12.51
 -23 0 0 1.08 5.59
 23 0 0 -5.12 7.29
 23 0 0 4.1 7.28
 23 0 0 -6.13 12.77
 -23 0 0 1.84 4.75
 -23 0 0 -10.36 13.6
 24 0 0 -5.94 2.53
 24 0 0 2.28 5.66
 24 0 0 6.04 10.43
 24 0 0 -8.29 11.62
 -24 0 0 1.69 5.66
 -24 0 0 -10.12 15.26
 -24 0 0 4.19 5.41
 -24 0 0 -3.17 6.64
 24 0 0 -3.7 11.53
 -24 0 0 -3.04 3.2
 25 0 0 -12.93 16.67
 25 0 0 -1.01 4.66
 25 0 0 5.75 6.61
 -25 0 0 -11.34 12.14
 -25 0 0 1.37 5.52
 -25 0 0 15.15 13.24
 -25 0 0 -7.12 6.84
 25 0 0 -2.41 6.7
 26 0 0 86.2 26.9
 26 0 0 50.25 20.63
 26 0 0 58.25 19.97
 -26 0 0 122.57 30.88
 26 0 0 56.22 16.53
 -26 0 0 109.89 27.1
 -26 0 0 122.01 30.11
 -26 0 0 148.71 32.2
 -27 0 0 -18.09 13.46
 -27 0 0 -5.51 3.75
 27 0 0 13.66 10.71
 27 0 0 -4.89 7.34
 27 0 0 23.78 13.33
 -27 0 0 -3.61 7.97
 -27 0 0 -1.27 5.44
 27 0 0 -4.66 12.96
 28 0 0 16.9 11.13
 -28 0 0 31.19 16.36
 28 0 0 11.44 4.4
 28 0 0 37.56 16.03
 -28 0 0 41.15 15.12
 28 0 0 3.26 7.89
 -28 0 0 26.97 10.65
 -29 0 0 7.06 6.97
 -29 0 0 -2.35 6.62
 29 0 0 2.54 5.76
 29 0 0 5.03 9.67
 -29 0 0 -1.38 5.4
 29 0 0 -1.23 8.1
 29 0 0 -0.16 6.62
 29 0 0 12.65 11.37
 -29 0 0 4.1 9.61
 -30 0 0 0.02 4.65
 -30 0 0 -15.33 9.75
 30 0 0 -2.5 2
 30 0 0 -3.91 3.76
 -30 0 0 2.06 5.94
 30 0 0 1.19 5.6
 -30 0 0 -0.32 3.93
 30 0 0 2.85 5.91
 -31 0 0 1.57 3.5
 -31 0 0 1.38 3.84
 -31 0 0 -1.5 1.72
 31 0 0 -3.19 3.77
 31 0 0 -0.26 6.69
 31 0 0 11.99 5.69
 -32 0 0 7.87 2.41
 32 0 0 -0.4 2.92
 32 0 0 2.48 2.92
 0 1 0 1196.05 42.07
 0 -1 0 1166.42 30.61
 0 1 0 1208.93 34.15
 0 1 0 1136.32 34.61
 1 1 0 0.63 1.38
 1 1 0 -0.18 1.57
 -1 -1 0 0.9 0.83
 1 1 0 -1.11 4.08
 -1 1 0 2.39 1.83
 -1 -1 0 0.69 0.85
 -1 1 0 0.67 1.33
 1 1 0 0.34 1.39
 1 1 0 1.4 0.59
 -1 1 0 -0.23 1.3
 -1 1 0 0.68 1.58
 -2 1 0 354.56 30.38
 -2 1 0 343.81 27.61
 2 1 0 404.95 18.91
 2 1 0 333.52 15.29
 2 1 0 335.16 22.93
 -2 -1 0 453.91 27.9
 2 1 0 404.43 25.32
 -2 1 0 378.81 26.18
 2 1 0 529.29 33.03
 2 -1 0 297.6 24.11
 -2 1 0 355.01 26.69
 2 -1 0 388.72 19.42
 -2 -1 0 391.33 16.96
 3 1 0 2.03 2.83
 -3 1 0 -1.47 2.5
 -3 -1 0 0.23 1.1
 3 -1 0 -1.59 3.37
 3 1 0 0.29 1.01
 -3 1 0 2.82 2.37
 -3 1 0 -2.4 2.37
 3 1 0 3.55 3.11
 -3 -1 0 -3.68 3.44
 3 -1 0 1.37 1.57
 -3 -1 0 3.44 1.51
 3 -1 0 0.27 1.25
 -3 1 0 2.06 3.54
 4 -1 0 17.39 8.07
 -4 1 0 14.51 9.32
 4 -1 0 13.33 4.01
 -4 1 0 20.06 7.64
 4 1 0 21.83 7.05
 4 -1 0 17.79 5.69
 -4 -1 0 11.69 5.57
 4 1 0 23.03 9.1
 -4 1 0 17.02 7.27
 -5 1 0 -0.83 2.13
 5 -1 0 0.62 2.86
 5 -1 0 0.55 1.88
 -5 1 0 3.03 6.75
 5 1 0 -0.22 1.97
 5 -1 0 0.66 0.86
 -5 -1 0 0.53 2.11
 5 1 0 0.62 2.9
 -5 1 0 -4.41 4.76
 -5 1 0 -2.73 4
 -6 1 0 312.6 35.78
 6 -1 0 338.35 33.47
 -6 1 0 304.41 27.03
 -6 1 0 280.69 37.78
 6 -1 0 339.14 43.87
 -6 -1 0 346.75 32
 6 1 0 365.79 35.24
 6 -1 0 322.77 20.89
 -7 -1 0 2.52 1.12
 -7 -1 0 -0.2 3.71
 7 -1 0 -4.64 6.85
 7 1 0 -3.68 6.11
 7 -1 0 3.21 3.74
 7 1 0 -2.62 3.91
 -7 1 0 1.15 2.55
 -7 1 0 0.6 3.85
 7 -1 0 10.61 7.22
 -7 1 0 -0.26 3.26
 7 -1 0 3.39 2.77
 8 1 0 986.41 80.24
 8 -1 0 779.4 75.78
 -8 -1 0 1040.35 76.13
 8 -1 0 832.13 83.91
 -8 1 0 961.87 51.99
 -8 1 0 903.96 71.79
 -8 -1 0 897.2 56.54
 -8 -1 0 917.59 67.34
 -8 1 0 806.61 64.06
 -9 -1 0 3.7 5.04
 -9 -1 0 -4.22 6.48
 -9 1 0 -2.35 2.69
 9 -1 0 1.59 5.84
 -9 1 0 6.37 9.61
 9 -1 0 3.4 6.69
 9 1 0 2.91 3.26
 9 1 0 -0.53 3.76
 -10 -1 0 261.14 41.86
 -10 1 0 249.03 30.23
 10 1 0 266.23 41.43
 -10 1 0 235.28 41.06
 10 -1 0 253.8 51.11
 10 -1 0 260.45 51.91
 -10 -1 0 236.01 32.32
 10 1 0 289.52 48.93
 -10 -1 0 277.1 44.05
 -11 -1 0 -2.53 5.92
 11 1 0 -1.45 4.89
 11 1 0 4.15 2.96
 -11 1 0 -1.23 3.43
 11 -1 0 1.29 10.05
 -11 -1 0 -8.72 10.83
 11 -1 0 -11 12.11
 -11 1 0 0.12 3.58
 -11 -1 0 -8.09 7.81
 12 1 0 74 27.99
 12 1 0 54.59 21.13
 -12 1 0 41.76 17.72
 -12 -1 0 70.22 19.97
 12 -1 0 49.24 26.37
 -12 -1 0 52.44 21.57
 -12 -1 0 57.26 22.05
 12 -1 0 47.68 26.16
 -13 -1 0 3.13 9.76
 13 1 0 2.73 11.28
 -13 -1 0 -3.66 8.61
 13 -1 0 -0.65 9.59
 13 1 0 3.47 11.84
 13 -1 0 6.07 8.8
 -13 -1 0 7.15 5.2
 -13 1 0 -2.16 10.25
 -14 1 0 448.63 70.41
 14 -1 0 538.94 90.69
 -14 -1 0 575.38 76.63
 14 -1 0 580.65 91.89
 -14 -1 0 535.39 78.14
 14 1 0 511.72 73.41
 14 1 0 565.32 87.11
 15 -1 0 12.29 17.97
 15 1 0 9.19 14.34
 -15 -1 0 4.07 3.14
 15 -1 0 -0.96 13.14
 -15 1 0 -5.21 7.87
 -15 -1 0 0.84 5.9
 15 1 0 1.3 9.27
 -16 1 0 417.26 75.4
 -16 -1 0 598.27 89.68
 -16 -1 0 500.19 80.95
 -16 1 0 675.14 86.55
 16 1 0 495.34 79.22
 16 1 0 593.9 97.75
 16 -1 0 558.83 98.62
 16 -1 0 368.9 77.79
 17 1 0 7.44 8.4
 -17 1 0 18.5 17.1
 -17 1 0 -0.68 6.43
 -17 -1 0 1.1 9.53
 17 1 0 -18.83 18.4
 17 -1 0 24.8 22.01
 17 1 0 0.3 6.33
 -17 -1 0 -5.43 16.22
 18 1 0 352.19 82.71
 -18 -1 0 339.64 74.59
 18 1 0 320.78 69.37
 18 -1 0 357.22 81.13
 -18 1 0 351.08 75.89
 18 -1 0 434.03 91.38
 19 1 0 -5.65 9.18
 19 1 0 -14.11 14.16
 -19 -1 0 0.87 5.93
 -19 1 0 -1.03 4.84
 -19 1 0 -2.17 8.57
 19 1 0 -5.07 15.4
 -19 -1 0 2.87 2.51
 -19 -1 0 2.75 2.17
 -19 1 0 2.79 5.13
 -19 1 0 -1.59 7.2
 19 1 0 1.35 5.27
 -19 -1 0 2.69 9.27
 19 -1 0 -1 5.22
 19 -1 0 -0.82 8.09
 19 1 0 -0.78 5.76
 19 1 0 0.09 7.12
 -19 -1 0 -17.72 17.6
 19 -1 0 -16.59 17.86
 -19 1 0 -12.8 15.04
 -19 -1 0 22.55 12.05
 20 1 0 35.02 18.1
 20 1 0 46.37 20.64
 -20 -1 0 29.84 13.89
 -20 1 0 34.98 12.3
 20 1 0 27.81 14.14
 -20 1 0 66.56 20.74
 -20 -1 0 46.08 16.03
 20 -1 0 29.34 13.31
 -20 -1 0 72.37 21.09
 20 -1 0 42.05 17.89
 20 -1 0 47.4 16.56
 -20 -1 0 30.24 14.72
 -20 1 0 43.98 14.95
 20 1 0 11.82 9.95
 20 1 0 51.23 27.53
 -20 -1 0 40.36 14.3
 -20 -1 0 20.88 17.67
 20 -1 0 -4.18 23.94
 20 1 0 38.04 20.69
 -20 1 0 37.77 15.64
 20 1 0 35.25 18.3
 21 1 0 0.49 7.05
 -21 1 0 -1.64 5.24
 21 1 0 0.08 7.06
 -21 -1 0 -2.7 7.16
 21 1 0 9.03 10.4
 21 -1 0 -1.96 10.3
 -21 1 0 -30.97 14.56
 -21 -1 0 0.5 2.66
 -21 -1 0 -1.23 2.83
 -21 1 0 0.98 6.42
 21 1 0 5.47 5.64
 -21 1 0 -0.55 8.85
 -21 -1 0 2.4 4.64
 -21 -1 0 -2.3 8.26
 21 -1 0 2.56 5.77
 21 1 0 -6.89 9.99
 -22 -1 0 279.08 44.88
 -22 1 0 266.86 42.54
 -22 -1 0 355.75 53.04
 -22 -1 0 334.41 48.93
 22 1 0 264.91 55.81
 22 -1 0 212.44 45.59
 -22 1 0 355.23 51.5
 22 1 0 257.26 47.6
 -22 1 0 288.81 48.86
 -22 1 0 282.14 42.43
 22 -1 0 295.65 52.46
 22 1 0 259.61 49.8
 -22 -1 0 340.17 52.66
 22 -1 0 265.35 53.8
 22 1 0 208.31 44.49
 22 1 0 255.07 47.96
 -22 -1 0 268.59 43.07
 23 1 0 -4.86 8.29
 23 -1 0 -4.36 10.66
 23 1 0 9.55 12.18
 -23 -1 0 -1.26 6.17
 -23 1 0 16.8 13.15
 23 -1 0 -3.01 4.64
 -23 -1 0 -2.32 8.22
 23 1 0 -5.39 12.93
 -23 1 0 9.8 10.81
 -23 -1 0 2.34 8.79
 23 -1 0 0.99 10.8
 -23 -1 0 -4.15 6.92
 -23 1 0 -0.58 2.65
 23 1 0 -7.61 17.96
 -23 1 0 -0.02 5.15
 23 1 0 3.23 4.73
 -23 -1 0 -7.03 9.86
 23 -1 0 -6.81 13.18
 -24 -1 0 478.94 56.73
 -24 -1 0 369.21 50.6
 24 -1 0 258.2 50.31
 -24 -1 0 361.43 56.93
 -24 -1 0 508.67 61.9
 24 -1 0 394.12 60.37
 -24 1 0 446.83 57.4
 -24 1 0 364.38 51.74
 -24 1 0 455.05 60.73
 -24 1 0 333.1 48.12
 24 -1 0 225.76 46.53
 24 -1 0 285.46 50.83
 24 1 0 301.55 53.68
 -24 -1 0 486.88 62.11
 24 1 0 344.01 55.18
 24 1 0 286.29 55.41
 24 1 0 261.51 47.02
 24 1 0 348.86 62.72
 25 -1 0 -9.24 13.39
 25 1 0 -9.22 8.12
 -25 1 0 -2.15 6.8
 -25 1 0 3.55 4.1
 -25 -1 0 1.62 3.4
 -25 -1 0 -0.56 6.91
 25 1 0 -3.68 5.96
 -25 -1 0 4.6 8.2
 25 -1 0 -1.07 6.85
 -25 1 0 1.57 4.65
 25 -1 0 2 9.18
 25 1 0 -9.23 17.29
 25 1 0 1.76 5.61
 -25 1 0 1.58 7.61
 -25 -1 0 2.48 4.27
 25 -1 0 11.32 8.76
 -25 -1 0 5.82 6.7
 25 1 0 1.65 2.97
 26 1 0 54.12 22.56
 26 1 0 63.58 21.89
 -26 1 0 114.23 29.76
 26 1 0 61.14 22.78
 26 1 0 45.37 13.83
 -26 -1 0 160.52 35.43
 -26 1 0 89.85 25.74
 -26 1 0 96.58 27.64
 -26 -1 0 120.08 28.66
 26 -1 0 102.97 29.58
 -26 -1 0 77.33 23.57
 -26 -1 0 99.25 30.09
 26 -1 0 35.68 12.75
 -26 1 0 86.46 22.95
 -26 -1 0 106.24 26.54
 26 -1 0 65.92 24.62
 26 1 0 68.44 23.85
 -27 1 0 -0.14 7.38
 -27 1 0 -4.31 7.53
 -27 1 0 7.83 4.35
 27 1 0 -13.21 17.31
 27 1 0 -5.98 8.78
 27 1 0 -13.24 12.26
 -27 1 0 -5.13 7.92
 -27 -1 0 7.12 4.79
 27 -1 0 -6.93 8.64
 -27 -1 0 3.5 4.92
 27 -1 0 -2.79 5.3
 27 -1 0 -9.05 10.73
 27 1 0 -9.22 10.42
 27 1 0 11.82 13.52
 -27 -1 0 4.18 4.4
 -27 -1 0 1.32 7.56
 28 1 0 84.43 26.53
 28 -1 0 56.09 20.33
 28 -1 0 40.32 17.82
 -28 -1 0 127.16 28.4
 -28 1 0 127.07 28.57
 -28 -1 0 108.29 27.34
 28 1 0 70.79 21.58
 28 1 0 96.93 27.92
 28 1 0 93.02 26.9
 -28 -1 0 131.2 31.33
 28 -1 0 67.29 22.47
 -28 1 0 137 30.8
 28 1 0 73.8 25.1
 -28 1 0 103.95 22.57
 -28 1 0 125.47 27.13
 -29 1 0 -10.08 10.53
 29 1 0 -0.02 9.42
 -29 1 0 -0.71 6.22
 29 1 0 0.59 3.77
 29 -1 0 -9.33 13.52
 -29 -1 0 4.24 6.9
 -29 -1 0 1.55 6.19
 29 -1 0 0.28 8.22
 -29 1 0 2.66 8.69
 -29 1 0 -6.76 10.22
 -29 -1 0 -8.34 11.2
 29 1 0 -8.73 10.21
 29 1 0 11.04 9.96
 29 -1 0 -1.66 3.23
 -30 1 0 -1.64 7.5
 -30 1 0 -5.91 9.71
 30 -1 0 -11.01 12.06
 30 -1 0 -0.77 7.51
 30 -1 0 4.8 4.25
 -30 1 0 0.49 2.93
 30 -1 0 1.95 4.32
 -30 1 0 11.28 8.67
 -30 -1 0 1.03 5.79
 30 1 0 -5.08 7.95
 30 1 0 14.16 10.33
 -30 -1 0 -0.72 3.75
 -30 -1 0 -1.08 7.76
 30 1 0 1.95 5.35
 30 1 0 -2.86 5.01
 31 -1 0 5.91 6.07
 -31 1 0 1.13 6.14
 31 1 0 6.35 6.28
 -31 -1 0 -1.25 2.72
 -31 -1 0 -9.92 6.38
 31 -1 0 0.58 6.47
 -31 -1 0 4.47 4.56
 31 -1 0 3.31 4.75
 -31 1 0 9.45 7.82
 31 1 0 6.32 7.72
 31 -1 0 12.06 10.78
 31 1 0 25.01 11.35
 -31 1 0 4.84 5.5
 32 -1 0 19.07 8.14
 32 -1 0 29.64 10.35
 -32 1 0 52.62 15.69
 -32 1 0 53.77 14.18
 -32 -1 0 58.44 16.73
 32 1 0 21.12 8.31
 -32 -1 0 51.07 13.17
 0 2 0 3541.46 89.7
 0 2 0 4026.91 94.41
 0 2 0 3252.94 87.61
 0 -2 0 4083.68 81.12
 0 2 0 4202.3 140.03
 0 2 0 3706.94 112.21
 0 2 0 3374.55 120.89
 1 2 0 -1.86 2.61
 -1 -2 0 -1.8 2.43
 -1 2 0 -0.39 2.81
 -1 2 0 -2.24 1.32
 -1 -2 0 -0.07 1.46
 -1 2 0 3.05 6.88
 1 2 0 4.08 4.54
 -1 -2 0 4.56 3.17
 1 2 0 0.32 2.71
 -1 2 0 3.78 2.84
 -1 2 0 -1.18 1.35
 1 2 0 -0.43 4.75
 1 2 0 6.25 6.58
 2 2 0 1011.44 44.14
 2 2 0 872.34 45.77
 -2 2 0 892.03 52.32
 -2 2 0 727.55 49.43
 -2 2 0 755.24 60.16
 2 2 0 1183 72.42
 -2 -2 0 958.96 47.01
 -2 2 0 975.31 57.62
 2 2 0 1006.65 55.02
 -2 -2 0 795.17 46.83
 -2 -2 0 983.06 37.64
 -2 2 0 923.01 49.47
 3 2 0 -0.31 1.03
 3 2 0 1.92 2.42
 3 2 0 0.88 3.49
 -3 2 0 0.99 3.8
 -3 2 0 0.2 2.59
 -3 2 0 1.04 1.49
 -3 -2 0 1.19 1.21
 3 2 0 2.12 1.45
 -3 -2 0 -0.22 3.29
 -3 2 0 8.14 11.26
 3 2 0 4.82 3.84
 3 2 0 1.23 5.09
 3 -2 0 1.25 1.05
 3 -2 0 4.42 6.5
 -3 -2 0 0.05 1.72
 -4 -2 0 6.42 4.62
 4 -2 0 2.38 2.87
 4 2 0 3.59 2.5
 -4 2 0 1.77 3.42
 4 2 0 4.8 2.84
 -4 2 0 -0.31 3.17
 -4 2 0 0.69 4.17
 4 2 0 0.34 3.24
 4 2 0 5.1 5.16
 4 2 0 6.16 3
 -4 2 0 0.6 3.73
 4 -2 0 -0.49 4.38
 -4 -2 0 4.12 3.96
 4 2 0 7.46 6.35
 -4 -2 0 6.42 3.15
 -4 -2 0 -0.2 1.29
 -5 -2 0 -0.58 3.96
 -5 2 0 -13.06 7.71
 5 -2 0 -4.51 3.69
 5 2 0 -1.85 2.88
 -5 -2 0 1.32 1.66
 5 2 0 -3.25 3.91
 -5 2 0 -1.54 5.02
 -5 -2 0 -3.05 5.79
 -5 2 0 -7.12 10.56
 5 2 0 2.17 2.83
 5 2 0 5.36 5.06
 5 -2 0 2.6 2.28
 -5 2 0 -0.1 2.89
 5 -2 0 2.99 3.04
 5 2 0 0.2 3.47
 6 -2 0 302.94 27.3
 -6 -2 0 183.07 27.75
 -6 -2 0 391.83 45.73
 6 2 0 271.61 33.86
 6 2 0 373.6 32.09
 -6 2 0 314.64 39.97
 6 2 0 313.89 23.11
 -6 2 0 290.06 37.41
 -6 2 0 255.8 37
 6 -2 0 234.02 39.22
 6 -2 0 301.29 22.37
 7 2 0 -2.08 4.3
 7 2 0 -6.56 8.44
 7 -2 0 1.95 2.01
 7 -2 0 -0.17 5.71
 -7 2 0 1.8 2.67
 7 2 0 1.52 2.91
 -7 2 0 -1.28 3.77
 -7 2 0 -2.12 5.3
 7 -2 0 -17.91 11.22
 -7 -2 0 -9.75 9.76
 -7 -2 0 6.59 5.44
 7 -2 0 0.75 2.7
 -8 2 0 47.94 17.13
 -8 -2 0 64.63 23.13
 -8 -2 0 62.54 17.2
 -8 -2 0 47.78 15.92
 -8 2 0 50.51 18.35
 8 -2 0 48.05 19.38
 8 -2 0 43.41 23.13
 8 2 0 61.84 20.35
 8 2 0 54.08 15.11
 -8 2 0 45.26 18.02
 8 -2 0 65.84 17.03
 8 -2 0 53.9 8.84
 9 -2 0 -9.86 13.49
 -9 -2 0 4 7.78
 9 -2 0 1.55 3.65
 -9 2 0 -3.93 4.62
 -9 -2 0 -5.25 9.18
 -9 2 0 -2.24 5.18
 9 2 0 -2.47 12.31
 -9 2 0 3.14 4.86
 9 -2 0 -3.91 3.64
 -9 -2 0 1.75 5.58
 10 -2 0 250.72 59.31
 10 2 0 342.4 43.76
 -10 -2 0 388.36 54.42
 -10 2 0 288.12 46.39
 10 2 0 403.47 57.99
 10 -2 0 271.73 56.36
 -10 -2 0 351 43.59
 -10 -2 0 339.75 48.91
 -10 2 0 283.08 44.03
 -10 2 0 265.34 45.36
 -11 -2 0 0.3 11.03
 -11 -2 0 -3.23 9.24
 11 2 0 -3.16 3.42
 11 -2 0 -3.71 14.42
 11 2 0 -0.38 4.79
 -11 2 0 5.33 8.55
 -11 2 0 1.63 6.1
 11 -2 0 5.81 8.91
 -11 -2 0 -0.72 7.98
 -12 2 0 586.6 74.9
 12 2 0 934.42 99.58
 12 -2 0 793.35 109.18
 -12 -2 0 946.23 77.87
 12 -2 0 755.76 104.26
 -12 -2 0 836.01 83.75
 12 2 0 825.07 77.72
 -12 -2 0 909.49 92.04
 -12 2 0 819.08 82.55
 -13 -2 0 -3.04 8.13
 -13 2 0 -4.54 12.82
 13 2 0 -11.39 13.53
 -13 -2 0 1.78 9.91
 13 2 0 -2.25 11.86
 -13 -2 0 -9.3 14.3
 13 -2 0 8.56 18.67
 -13 2 0 -3.04 7.01
 13 -2 0 18.46 21.76
 13 2 0 -0.53 10
 14 -2 0 544.62 95.84
 -14 2 0 694.13 82.68
 14 2 0 728.68 86.28
 -14 2 0 487.95 74.4
 14 -2 0 569.79 95.21
 -14 -2 0 688.38 89.06
 14 2 0 747.95 99.81
 14 2 0 585.61 72.93
 -14 -2 0 748.24 87.15
 -15 -2 0 5.99 9.53
 15 -2 0 10.87 8.59
 15 2 0 -2.56 10.51
 15 2 0 1.31 3.95
 15 -2 0 7.94 7.36
 -15 -2 0 10.14 14.02
 -15 2 0 5.78 9.69
 -15 2 0 -4.03 12.43
 -16 2 0 534.73 78.44
 16 2 0 409.79 74.31
 -16 2 0 346.24 68.84
 -16 -2 0 573.87 83.43
 16 2 0 544.39 91.61
 16 -2 0 438.85 89.3
 -16 -2 0 488.27 81.88
 16 -2 0 442.31 90.41
 -17 -2 0 -6.03 11.4
 17 -2 0 -25.67 22.97
 17 -2 0 17.02 17.66
 -17 -2 0 3.46 13.58
 -17 2 0 14.66 15.59
 17 2 0 11.68 10.15
 17 2 0 -8.86 10.89
 -17 2 0 -1.61 7.63
 18 -2 0 78.1 38.62
 18 -2 0 101.27 40.98
 18 2 0 83.48 37.7
 18 2 0 126.37 43.53
 -18 2 0 111.78 42.09
 -18 -2 0 126.3 44.32
 -18 -2 0 187.77 53.13
 -19 -2 0 -4.14 10.57
 -19 -2 0 -3.81 6.84
 -19 -2 0 -7.43 6.79
 -19 -2 0 4.89 5.03
 -19 -2 0 7.18 8.17
 -19 2 0 2.3 5.46
 -19 2 0 -4.8 8.72
 19 2 0 21.98 18.29
 19 2 0 -8.41 14.35
 19 2 0 -7.63 11.69
 -19 -2 0 -3.42 7.74
 -19 2 0 2.11 5.81
 19 -2 0 13.03 18.94
 -19 2 0 16.73 10.42
 19 2 0 1.1 1.99
 -19 -2 0 -4.16 9.34
 -19 -2 0 -5.25 14.47
 19 2 0 -2.46 8.01
 19 -2 0 -7.78 13.58
 19 2 0 -0.78 9.55
 19 -2 0 -7.14 18.95
 -19 2 0 -11.31 8.1
 -20 -2 0 7.5 8.08
 -20 -2 0 6.76 2.69
 -20 2 0 29.07 12.46
 20 2 0 9.96 4.58
 20 2 0 32.64 16.31
 20 2 0 13.97 14.94
 -20 2 0 11.37 12.49
 -20 2 0 16.72 8.34
 -20 -2 0 21.16 11.16
 -20 -2 0 25.97 11.65
 20 -2 0 9.11 11.91
 -20 -2 0 23.42 7.58
 20 -2 0 20.73 14.65
 20 2 0 29.43 15.67
 20 2 0 9.44 9.62
 -20 2 0 20.72 10.67
 20 -2 0 45.08 32.89
 -20 -2 0 18.19 10.68
 20 2 0 70.31 37.81
 -21 -2 0 9.04 9.51
 -21 -2 0 4.74 7.18
 21 -2 0 6.12 3.71
 21 2 0 4.85 2.62
 -21 2 0 -0.86 2.01
 -21 -2 0 -1.73 4.27
 -21 -2 0 8.82 5.85
 -21 -2 0 -0.49 3.09
 21 2 0 -9.75 10.1
 -21 2 0 8.57 8.24
 21 2 0 -5.65 9.22
 -21 2 0 13.98 13.07
 -21 2 0 1.94 4.97
 21 2 0 11.42 9.69
 -21 -2 0 3.09 5
 -22 2 0 83.07 24.19
 22 2 0 73.92 25.25
 22 -2 0 78.31 27.2
 -22 2 0 88.64 27.62
 22 2 0 60.82 23.16
 -22 -2 0 118.49 28.06
 -22 -2 0 100.46 25.61
 22 2 0 57.93 22.4
 22 2 0 45.11 22.96
 -22 -2 0 95.32 27.27
 -22 -2 0 139.75 31.03
 -22 2 0 88.08 23.7
 -22 -2 0 131.94 28.64
 -22 2 0 84.87 22.65
 -22 -2 0 91.68 25.97
 22 2 0 54.49 21.01
 -23 2 0 5.02 3.98
 -23 -2 0 -11.35 9.05
 23 2 0 5.62 4.65
 23 -2 0 0.18 3.45
 -23 -2 0 -0.67 14
 23 2 0 -0.57 7.67
 23 2 0 -2.87 8.49
 -23 -2 0 2.78 4.6
 23 -2 0 1.47 6.62
 -23 2 0 -4.96 10.83
 -23 2 0 -1.03 7.93
 23 2 0 -1.12 7.75
 -23 -2 0 3.25 7.32
 -23 -2 0 9.8 10.97
 -23 2 0 0.81 7.53
 23 2 0 -4.33 15.37
 -24 2 0 119.83 30.78
 -24 2 0 100.93 28.4
 24 2 0 75.36 25.08
 -24 -2 0 100.25 26.66
 24 -2 0 64.74 24.75
 24 2 0 67.07 24.1
 24 -2 0 57.54 20.88
 -24 2 0 76.3 19.2
 24 2 0 70.81 26.19
 24 2 0 72.29 24.71
 24 2 0 86.86 29
 -24 2 0 88.68 23.8
 -24 -2 0 148.47 33.83
 -24 -2 0 109.32 29.31
 -24 -2 0 172.33 34.89
 -24 -2 0 91.22 28.09
 24 -2 0 63.67 25.42
 -25 2 0 -3.18 5.25
 -25 -2 0 9.67 8.98
 25 2 0 10.42 12.84
 -25 -2 0 12.04 9.6
 -25 2 0 -9.59 12.59
 -25 2 0 -5.11 10.35
 25 2 0 0.57 6.58
 25 2 0 17.07 15.45
 -25 -2 0 1.25 8.32
 -25 2 0 7.94 11.63
 -25 2 0 -10.9 13.13
 25 2 0 4.75 8.36
 -25 -2 0 3.75 9.1
 25 -2 0 -4.17 8.73
 25 -2 0 -1.61 3.39
 25 2 0 -4.33 9.73
 -25 -2 0 1.26 5.66
 25 -2 0 -11.6 10.68
 26 -2 0 280.85 49.77
 -26 -2 0 372.11 52.56
 26 2 0 162.13 37.64
 -26 -2 0 340.25 49.82
 -26 -2 0 404.54 54.83
 -26 2 0 234.87 39.63
 -26 -2 0 228.07 43.32
 26 -2 0 152.23 38.11
 -26 2 0 269.52 45
 -26 2 0 262.55 42.24
 26 -2 0 159.88 38.26
 -26 -2 0 223.68 40.93
 26 2 0 171.24 39.04
 26 2 0 183.46 38.28
 -26 2 0 237.71 42.27
 26 2 0 175.2 41.04
 26 2 0 189.41 39.54
 27 2 0 -1.72 10.64
 -27 2 0 3.1 4.91
 -27 2 0 -12.76 15.41
 27 2 0 -6.14 4.18
 -27 -2 0 2.66 5.29
 -27 2 0 -5.19 8.38
 27 -2 0 0.76 5.39
 -27 2 0 9.24 9.89
 27 -2 0 -9.24 12.23
 27 2 0 7.61 8.38
 -27 -2 0 -6.65 6.99
 -27 -2 0 -3.11 5.25
 27 2 0 7.41 8.19
 27 2 0 1.51 3.85
 -27 -2 0 1.97 5.81
 27 -2 0 2.39 7.67
 -28 -2 0 87.45 25.07
 28 2 0 73.36 22.59
 -28 2 0 106.62 26.35
 28 2 0 59.92 20.86
 28 2 0 58.7 21.01
 28 2 0 60.67 17.1
 -28 2 0 99.88 24.85
 28 -2 0 69.25 21.18
 -28 2 0 94.54 24.19
 28 -2 0 53.8 18.98
 -28 -2 0 92.57 26.07
 28 2 0 85.16 25.24
 -28 -2 0 116.17 29.01
 -28 -2 0 122.49 29.8
 28 -2 0 30.87 14.22
 -28 2 0 113.45 26.42
 29 2 0 -1.7 8.99
 29 2 0 -13.48 13.38
 29 2 0 2.9 7.76
 29 -2 0 26.33 11.01
 29 2 0 2.79 6.92
 -29 -2 0 -14.67 8.33
 29 2 0 -8.22 11.87
 -29 2 0 -0.28 7.56
 -29 2 0 16.91 9.98
 -29 -2 0 2.07 3.55
 -29 2 0 6.04 4.34
 29 -2 0 -5.4 4.09
 -29 2 0 -2.93 3.4
 29 -2 0 4.51 9.94
 -30 -2 0 -1.74 5.92
 30 -2 0 -5.31 5.34
 30 2 0 -3.84 9.69
 -30 2 0 -0.18 5.02
 -30 2 0 2.27 4.31
 30 2 0 0.58 4.08
 -30 2 0 2.08 7.31
 30 2 0 7.66 8.26
 30 -2 0 -3.99 6.51
 -30 2 0 -3.9 5.51
 30 -2 0 4.47 2.63
 30 2 0 -5.42 5.6
 -30 -2 0 -10.56 7.79
 30 2 0 -2.92 10.62
 31 2 0 4.85 7.72
 -31 -2 0 -8.64 9.38
 31 2 0 15.84 9.12
 31 2 0 16.99 9.25
 -31 -2 0 -2.4 6.37
 31 -2 0 0.35 6.56
 31 -2 0 -9.32 6.51
 31 2 0 -2.61 3.28
 31 -2 0 -0.96 6.82
 -31 -2 0 -2.49 6.59
 -31 2 0 7.15 7.6
 -31 2 0 -4.94 5.77
 -31 2 0 2.03 4.79
 32 2 0 10.8 5.87
 32 -2 0 5.3 4.65
 32 -2 0 3.06 5.02
 -32 2 0 13.74 8.19
 -32 -2 0 24.26 9.73
 -32 -2 0 27.79 10.98
 -32 2 0 19.17 10.22
 0 3 0 938.4 58.73
 0 3 0 1096.63 59.12
 0 3 0 1064.96 60.73
 0 -3 0 1063.49 50.82
 0 3 0 1153.09 90.35
 0 3 0 1101.53 72.67
 0 3 0 852.5 71.79
 -1 3 0 -0.51 4.91
 -1 3 0 7.24 4.55
 1 3 0 -0.36 1.74
 -1 3 0 -1.42 6.16
 1 -3 0 5.1 3.58
 -1 3 0 2.01 3.13
 1 3 0 3.5 7.62
 -1 -3 0 -0.61 2.41
 1 3 0 -0.59 3.05
 1 3 0 -0.09 3.14
 -1 3 0 1.35 9.62
 -1 3 0 0.52 2.65
 1 3 0 -1.81 2.22
 -1 -3 0 -0.33 2.26
 -1 -3 0 -0.26 2.66
 2 3 0 2015.19 115.08
 2 3 0 1825.94 82.11
 -2 -3 0 1742.7 64.11
 -2 3 0 1239.86 82.03
 -2 3 0 1466.07 81.34
 -2 -3 0 1351.4 74.81
 -2 3 0 1797 92.96
 2 3 0 1775.97 92.73
 -2 3 0 1750.37 82.54
 -2 3 0 1315.65 93.76
 2 3 0 1538.01 73.71
 -2 -3 0 1737.31 73.49
 -3 -3 0 -2.02 3.2
 3 3 0 -5.17 4.53
 -3 -3 0 2.5 3.59
 -3 3 0 -0.28 3.77
 -3 -3 0 2.63 2.68
 -3 3 0 0.28 2.78
 -3 3 0 3.84 7.07
 -3 3 0 -2.15 3.85
 -3 3 0 -0.57 5.31
 3 3 0 -1.9 3.52
 3 3 0 -3.33 6.44
 3 3 0 1.05 2.5
 4 3 0 2007.7 112.49
 -4 3 0 1110.26 77.21
 -4 -3 0 1485.54 80.21
 4 3 0 1561.13 67.18
 4 3 0 1895.47 80.21
 -4 3 0 1102.13 93.04
 -4 -3 0 1533.87 54.66
 -4 3 0 1379.53 87.03
 4 3 0 1299.99 72.81
 4 3 0 1208.24 67.78
 4 -3 0 1086.67 73.28
 -4 -3 0 1244.83 75.01
 4 -3 0 1252.8 54.04
 -5 3 0 3.46 9.77
 -5 -3 0 -0.69 2.84
 5 -3 0 1.12 4.84
 -5 -3 0 0.83 3.08
 -5 -3 0 -2.06 5.92
 5 3 0 1.2 2.12
 5 3 0 1.85 3.08
 5 -3 0 4.53 3.99
 -5 3 0 7 7.81
 5 3 0 7.38 5.61
 -5 -3 0 -5.21 7.9
 -5 3 0 3.4 8.95
 -5 3 0 -10.97 7.96
 5 3 0 -0.2 1.89
 6 3 0 1.49 5.35
 -6 3 0 2.61 4.91
 6 -3 0 3.33 2.96
 -6 -3 0 2.52 0.97
 -6 3 0 3.81 7.66
 6 -3 0 0.94 1.79
 -6 -3 0 1.35 3.41
 6 -3 0 7.28 5.8
 -6 -3 0 -1.75 6.09
 -6 -3 0 2.49 2.81
 6 3 0 -3.64 7.01
 6 3 0 -0.31 3.3
 6 -3 0 1.67 8.23
 6 3 0 8.15 5.13
 6 3 0 5.43 2.72
 -6 3 0 5.7 4.74
 -6 3 0 -0.57 7.1
 7 -3 0 2.75 1.88
 -7 -3 0 3.95 5.9
 -7 3 0 3.63 7.89
 7 3 0 0.23 5.38
 -7 3 0 -1.1 6.03
 -7 -3 0 -1.92 7.86
 -7 3 0 -7.72 7.5
 7 -3 0 -7.94 11.81
 7 -3 0 8.06 4.67
 7 3 0 4.23 4.95
 7 3 0 -0.97 2.3
 7 3 0 1.79 6.49
 -7 3 0 -11.78 10.16
 -7 -3 0 -3.17 7.23
 7 -3 0 2.24 2.99
 8 3 0 1069.85 50.61
 8 3 0 945.67 57.99
 -8 -3 0 1096.79 92.99
 8 3 0 862.03 72.34
 8 -3 0 760.27 96.99
 8 3 0 1010.27 80.56
 -8 -3 0 967.23 77.54
 8 -3 0 810.98 86.45
 -8 -3 0 924.18 76.9
 8 -3 0 866.36 44.74
 -8 3 0 764.47 75.74
 -8 3 0 789.24 74.1
 8 -3 0 1030.34 60.51
 -8 3 0 737.18 80.62
 -8 3 0 861.75 77.05
 -9 3 0 -7.57 8.49
 9 3 0 2.1 3.52
 9 3 0 4.67 5.21
 9 3 0 -2.12 4.29
 9 -3 0 -14.68 12.13
 -9 -3 0 -1.57 10.47
 9 -3 0 3.26 7.18
 -9 -3 0 -10.33 14.89
 9 3 0 0.39 2.15
 -9 -3 0 3.74 3.71
 9 -3 0 4.88 4.17
 -9 3 0 0.45 6.25
 -9 3 0 3.38 2.48
 10 -3 0 1112.65 112.77
 -10 3 0 1072.49 92.91
 10 3 0 1353.93 103.76
 -10 3 0 1034.69 97.98
 -10 -3 0 1235.44 89.86
 -10 -3 0 1075.39 90.19
 -10 3 0 904.89 87.71
 10 -3 0 1021.12 122.03
 10 3 0 1058.04 90.97
 11 3 0 1.75 3.57
 -11 3 0 -1.07 5.61
 -11 -3 0 6.87 5.59
 11 -3 0 -1.32 10.65
 11 3 0 -0.55 4.84
 -11 3 0 -2.13 5.93
 11 -3 0 -20.3 15.87
 11 3 0 -6.51 9.63
 -11 -3 0 0.07 6.5
 -11 -3 0 1.84 3.29
 12 3 0 1256.59 111.68
 12 -3 0 925.3 123.05
 12 -3 0 1079.6 121.55
 -12 -3 0 1298.29 115.48
 -12 3 0 765.59 87.69
 -12 3 0 1058.04 98.53
 -12 -3 0 1150.99 91.83
 -12 -3 0 1022.23 96.71
 12 3 0 970.94 94.67
 13 -3 0 -2.63 11.3
 -13 3 0 -3.56 8.2
 13 3 0 2.46 6.83
 -13 -3 0 -3.2 5.9
 -13 -3 0 0.57 3.13
 13 -3 0 -6.8 20.18
 13 3 0 5.14 11.8
 -13 3 0 2.59 6.58
 -13 -3 0 -17.58 11.58
 14 -3 0 724.18 116.38
 -14 3 0 818.61 94.78
 14 3 0 720.38 88.73
 14 3 0 975.44 109.58
 14 -3 0 762.66 110.38
 -14 -3 0 905.3 104.18
 -14 -3 0 779.85 82.06
 -14 -3 0 786.11 93.77
 -14 3 0 548.62 80.47
 15 3 0 -2.25 10.44
 -15 -3 0 14.61 19.74
 15 -3 0 25.23 22.54
 15 -3 0 3.63 4.34
 -15 3 0 -4.76 13.19
 -15 -3 0 1.48 12.01
 15 3 0 2.22 7.2
 -15 3 0 -1.88 12.52
 16 3 0 374.96 75.77
 -16 3 0 400 70.32
 16 3 0 368.25 68.36
 16 -3 0 361.56 84.8
 16 -3 0 297.04 79.54
 -16 -3 0 379.42 73.67
 -16 -3 0 425.93 73.68
 -16 3 0 310.48 67.15
 17 3 0 -0.41 17.41
 17 3 0 -9.27 10.8
 -17 -3 0 15.91 20.97
 17 -3 0 5.21 19.81
 -17 3 0 -3.32 10.13
 17 -3 0 -4.67 8.25
 -17 -3 0 -12.63 6.73
 -18 -3 0 65.69 20.61
 -18 -3 0 59.86 18.2
 18 -3 0 30.48 19.64
 18 3 0 55.26 21.97
 -18 3 0 18.28 13.46
 18 -3 0 -57.79 36.56
 -18 -3 0 72.81 32.97
 -18 -3 0 66.26 32.09
 18 3 0 29.43 21.45
 18 3 0 60.82 28.81
 18 3 0 42.19 18.17
 -18 3 0 89.67 40.62
 -18 3 0 37.82 13.24
 18 3 0 69.43 34.51
 -18 3 0 50.59 16.27
 18 3 0 39.96 15.83
 -18 -3 0 54.69 16.61
 -18 3 0 40.83 14.4
 -19 -3 0 -1.36 4.03
 19 3 0 -8.43 20.12
 -19 3 0 -0.91 3.45
 -19 -3 0 -4.4 7.75
 -19 -3 0 1.24 10.17
 -19 3 0 6.6 7.28
 -19 3 0 7.62 5.32
 -19 -3 0 -8.33 29.35
 19 -3 0 53.47 35.99
 19 3 0 5.7 8.78
 -19 3 0 -27.98 22.53
 19 3 0 -9.61 19.84
 -19 -3 0 -4.56 9.41
 19 3 0 -4.76 6.09
 19 -3 0 9.3 5
 19 -3 0 -57.69 36.55
 -19 -3 0 -1.81 6.91
 19 3 0 0.42 6.55
 19 3 0 -20.62 11.61
 -19 3 0 6.44 6.32
 19 3 0 -4.49 9.76
 -19 3 0 -3.42 2.43
 -20 3 0 131.37 30.16
 20 3 0 103.37 28.75
 20 -3 0 87.51 28.7
 -20 -3 0 170.15 34.64
 20 3 0 108.63 29.87
 20 3 0 105.32 26.75
 -20 -3 0 110.6 31.25
 -20 -3 0 144.2 28.83
 20 3 0 199.12 51.44
 -20 3 0 149.1 31.76
 -20 -3 0 125.44 29.26
 -20 3 0 138.6 28.99
 20 -3 0 120.54 56.73
 20 3 0 97.68 28.34
 -20 3 0 63.92 27.37
 -21 3 0 0.02 7.42
 -21 -3 0 2.15 6.42
 21 3 0 -10.58 9.64
 -21 3 0 -4.32 3.21
 21 3 0 -2.95 6.74
 21 3 0 -13.22 10.44
 -21 3 0 0.71 2.17
 -21 -3 0 -1.42 4.38
 21 3 0 -5.38 3.46
 -21 -3 0 1.81 5.7
 -21 3 0 9.45 8.74
 -21 -3 0 0.02 5.4
 -21 -3 0 -1 6.19
 21 3 0 5.03 6.61
 22 3 0 463.34 63.09
 -22 -3 0 553.85 63.88
 -22 3 0 554.3 61.79
 22 3 0 560.24 87.76
 -22 -3 0 645.42 67.58
 -22 3 0 503.97 68.14
 -22 3 0 635.06 69.17
 -22 3 0 609.08 65.2
 -22 -3 0 753.43 71.36
 -22 -3 0 640.77 65.02
 22 3 0 486.58 67.24
 22 -3 0 590.15 74.21
 -22 3 0 518.47 64.59
 22 3 0 514.67 67.36
 22 3 0 476.54 61.07
 -22 -3 0 902.08 79.86
 -23 -3 0 10.19 8.23
 23 3 0 7.84 14.8
 23 -3 0 8.66 12.89
 -23 3 0 -11.34 15.46
 -23 -3 0 2.29 4.52
 -23 3 0 -3.46 10.41
 23 3 0 13.3 16.82
 -23 -3 0 4.68 8.38
 -23 3 0 -22.57 13.01
 -23 3 0 4.11 6.49
 -23 3 0 -4.21 9.63
 23 3 0 10.19 12.79
 23 3 0 -2.19 5.64
 -23 -3 0 -1.01 8.79
 23 3 0 1.61 11.72
 24 3 0 306.26 52.89
 -24 3 0 381.12 52.47
 -24 3 0 370.49 52.91
 24 3 0 287.98 50.13
 -24 -3 0 388.64 51.86
 24 3 0 333.73 49.71
 24 3 0 321.2 56.06
 24 3 0 257.2 55.34
 24 -3 0 353.49 56.38
 -24 3 0 240.73 53.74
 -24 3 0 313.92 48.4
 -24 -3 0 456.33 58.45
 -24 -3 0 477.37 57.64
 24 -3 0 243.33 49.98
 -24 -3 0 430.66 56.45
 -24 3 0 339.82 48.58
 -25 -3 0 5.51 6.03
 25 3 0 -15.07 12.94
 25 -3 0 7.39 10.99
 -25 -3 0 -4.66 6.53
 -25 -3 0 -0.96 10.92
 -25 3 0 -4.54 8.67
 25 3 0 -0.88 4.9
 25 3 0 -5.51 10.41
 25 -3 0 -10.75 13.3
 -25 3 0 3.62 8.35
 -25 3 0 -0.87 9.05
 25 -3 0 -8.6 10.92
 -25 3 0 -0.09 6.52
 25 3 0 -4.36 9.24
 25 3 0 -5.1 6.56
 26 3 0 139.8 35.71
 26 -3 0 98.21 26.5
 -26 -3 0 175.55 38.77
 26 3 0 142.18 35.14
 26 -3 0 124.26 33.73
 -26 -3 0 194.3 38.06
 -26 3 0 175.27 35.61
 26 3 0 136.83 33.91
 26 -3 0 137.8 37.86
 -26 -3 0 174.21 36.92
 -26 3 0 220.82 39.73
 26 3 0 125.24 38.22
 -26 3 0 192.13 36.38
 26 3 0 122.98 28.51
 -26 3 0 196.51 36.67
 27 3 0 12.36 13.86
 -27 -3 0 2.82 4.45
 -27 3 0 -10.33 8.84
 27 -3 0 5.68 3.56
 -27 3 0 -5.15 8.24
 27 -3 0 5.01 9.6
 27 3 0 -7.02 10.82
 27 -3 0 -4.84 8.98
 27 3 0 7.74 7.29
 -27 -3 0 -2.62 7.34
 -27 3 0 0.89 4.39
 -27 -3 0 -9.52 8.55
 27 3 0 -0.57 4.25
 27 3 0 3.46 4.17
 -27 3 0 9.9 10.95
 -28 -3 0 80.83 23.01
 28 -3 0 37.56 17.13
 -28 3 0 94.7 24.57
 28 3 0 39.17 14.8
 -28 3 0 90.99 23.94
 -28 3 0 106 25.8
 28 -3 0 49.91 16.67
 -28 -3 0 103.75 27.77
 28 3 0 37.6 15.86
 28 3 0 55.63 17.02
 28 3 0 46.3 17.92
 -28 -3 0 74.47 23.62
 -28 3 0 68.64 18.14
 28 3 0 49.17 16.88
 28 -3 0 28.25 15.2
 29 -3 0 -9.66 10.36
 -29 -3 0 -5.39 6.72
 29 3 0 -1.42 3.54
 -29 3 0 10.32 5.8
 29 3 0 -7.94 8.74
 29 -3 0 0.53 4.16
 -29 -3 0 2.21 3.48
 -29 3 0 1.16 7.86
 -29 -3 0 4.23 6.7
 -29 3 0 5.47 7.46
 29 3 0 0.9 6.62
 29 3 0 2.16 5.57
 29 3 0 -13.42 12.57
 -29 3 0 -4.1 6.17
 -30 3 0 16.89 7.26
 30 3 0 9.62 9.59
 30 3 0 9.02 7.51
 -30 3 0 33.72 12.41
 30 3 0 4.86 3.86
 30 3 0 16.38 11.52
 30 -3 0 10.95 7.2
 30 -3 0 1.97 5.11
 -30 -3 0 27.94 13.37
 -30 -3 0 6.9 4.69
 -30 3 0 19.51 11.57
 31 3 0 0.58 3.73
 -31 3 0 -1.9 3.09
 31 3 0 0.97 6.8
 31 3 0 6.57 4.94
 -31 3 0 0.08 6.24
 31 3 0 -4.81 6.74
 -31 -3 0 -6.58 6.78
 -31 -3 0 -5.16 5.04
 31 -3 0 -14.24 11.24
 -31 -3 0 3.11 7.4
 -31 3 0 -11.08 7.92
 31 -3 0 -3.49 4.59
 31 -3 0 -5.83 5.39
 0 4 0 1262.68 81.91
 0 -4 0 1393.02 76.93
 0 4 0 1596.75 121.89
 0 4 0 1358.87 101.55
 0 -4 0 1619.66 72.48
 0 4 0 1362.6 100.46
 0 4 0 1636.63 87.71
 1 -4 0 4.48 4.47
 -1 4 0 0.15 4.5
 -1 -4 0 -2.44 3.97
 -1 -4 0 1.13 1.27
 1 4 0 -0.3 4
 1 4 0 -1.77 3.14
 1 4 0 0.61 6.86
 -1 4 0 4.28 2.49
 -1 4 0 -6.04 7.52
 1 4 0 0.22 12.44
 -1 4 0 -1.61 5.69
 -1 4 0 1.44 2.95
 -1 -4 0 -4.52 2.82
 1 4 0 6.03 8.3
 -2 -4 0 402.88 36.69
 -2 -4 0 363.7 37.48
 2 4 0 439.96 61.32
 -2 4 0 303 50.5
 -2 4 0 342.43 44.08
 -2 4 0 360.53 43.41
 -2 4 0 341.49 45.48
 2 4 0 351.96 41.88
 2 4 0 302.76 39.79
 2 4 0 352.79 49.37
 -2 -4 0 300.92 40.19
 2 4 0 368.15 46.77
 -2 4 0 299.41 51.72
 2 -4 0 324.56 33.45
 3 4 0 1.01 2.26
 -3 4 0 -1.61 5.4
 -3 -4 0 2.38 4.77
 3 4 0 -3.39 5.38
 -3 -4 0 3.26 5.28
 3 4 0 -9.41 14.57
 -3 4 0 2.7 8.13
 3 4 0 -4.45 6.68
 -3 4 0 -10.98 9.76
 -3 -4 0 2.46 4.84
 -3 4 0 5.53 6.64
 3 4 0 2.82 6.76
 -3 4 0 0.55 5.47
 -3 4 0 -2.65 5.12
 4 4 0 45.8 17.31
 -4 4 0 44.38 17.87
 -4 4 0 56.4 22.72
 -4 -4 0 80.94 14.67
 -4 4 0 47.79 21.75
 4 4 0 85.97 28.22
 4 -4 0 57.14 16.56
 -4 -4 0 75.68 19.25
 4 4 0 101.4 23.03
 4 4 0 66.63 19.3
 4 4 0 67.35 19.18
 -4 4 0 43.64 17.69
 -4 4 0 65.25 19.47
 -4 -4 0 49.15 16.19
 -5 4 0 -5.44 9.01
 -5 -4 0 0.89 2.39
 5 4 0 2.49 4.66
 -5 4 0 6.49 3.83
 -5 4 0 -1.72 9.7
 -5 -4 0 1.24 6.27
 5 4 0 0.82 4.29
 5 -4 0 8.1 6.07
 5 4 0 0.67 7.51
 5 4 0 3.01 4.56
 5 -4 0 -1.66 8.64
 -5 -4 0 -3.27 7.82
 -5 -4 0 1.14 2.87
 -5 4 0 7.92 14.4
 -5 4 0 5.26 5.55
 6 4 0 636.83 70.61
 6 4 0 581.15 49.19
 -6 -4 0 357.4 53.19
 -6 4 0 363.13 57.43
 -6 4 0 338.38 59.44
 6 -4 0 418.75 34.12
 -6 4 0 346.19 51.23
 6 -4 0 387.29 53.07
 6 4 0 373.13 47.26
 -6 -4 0 515.2 36.28
 6 4 0 363.46 53.27
 -6 -4 0 332.27 48.75
 6 -4 0 328.31 65.32
 -6 -4 0 452.39 57.8
 -6 4 0 376.46 53.57
 -7 -4 0 4.14 5.82
 7 -4 0 -0.76 1.6
 7 4 0 2.62 6.16
 7 4 0 6.3 3.89
 -7 4 0 5.88 11.3
 -7 4 0 -6.35 8.27
 -7 -4 0 -0.49 4.43
 7 -4 0 -3.06 3.65
 -7 -4 0 -4.51 8.44
 -7 4 0 1.87 5.64
 -7 4 0 7.48 12.01
 7 4 0 3.93 5.42
 7 -4 0 -4.64 8.91
 -7 -4 0 -4.73 5.48
 7 -4 0 -6.18 3.38
 -8 -4 0 13.46 9.87
 8 4 0 12.1 6.32
 8 4 0 15.6 7.87
 -8 4 0 12.39 11.29
 8 -4 0 10.85 14.49
 8 -4 0 9.93 9.87
 -8 4 0 14.57 13.59
 -8 -4 0 15.44 10.46
 8 4 0 10.55 8.18
 -8 4 0 8.73 11.33
 -8 -4 0 13.34 11.39
 8 -4 0 7.43 3.51
 -8 4 0 5.72 4.99
 -9 -4 0 5.43 9.98
 -9 -4 0 -9.42 13.48
 9 -4 0 -7.37 10.27
 9 4 0 4.54 14.59
 -9 4 0 1.09 7.51
 9 -4 0 3.12 14.58
 9 4 0 -3.56 8.13
 -9 -4 0 -0.75 2.84
 -9 4 0 6.88 7.42
 -9 4 0 -5.81 11.91
 -10 4 0 5.02 5.83
 -10 -4 0 -0.2 12.85
 10 4 0 0.23 4.91
 -10 4 0 -1.36 9.6
 10 4 0 4.47 9.42
 -10 -4 0 -2.31 5.54
 -10 4 0 0.68 6.08
 -10 -4 0 13.05 8.45
 10 -4 0 -3.73 7.27
 10 -4 0 -3.83 7.11
 -11 -4 0 5 6.51
 -11 4 0 -0.51 8.45
 -11 4 0 -8.52 17.22
 -11 4 0 1.85 9.68
 -11 -4 0 0.93 8.23
 11 -4 0 1.91 10
 11 4 0 4.37 7.9
 11 4 0 1 4.52
 11 -4 0 -9.44 10.72
 12 -4 0 459.22 79.79
 -12 -4 0 550.66 73.96
 12 -4 0 503.4 93.55
 12 4 0 577.35 78.76
 -12 -4 0 562.14 71.75
 12 4 0 520.95 71.79
 -12 4 0 348.11 61.63
 -12 4 0 517.91 73.93
 -12 -4 0 738.1 87.83
 13 -4 0 16.13 18.85
 -13 4 0 3.25 9.42
 -13 -4 0 3.45 9.77
 -13 -4 0 -6.83 10.12
 -13 4 0 -4.23 4.04
 13 4 0 11.36 13.49
 -13 -4 0 3.88 3.37
 13 4 0 -2.08 10.5
 13 -4 0 9.07 14.86
 -14 -4 0 12.66 17
 -14 -4 0 21.46 11.39
 -14 -4 0 11.78 9.25
 -14 4 0 8.53 3.52
 14 4 0 31.05 19.06
 -14 4 0 19.12 15.11
 14 -4 0 19.07 15.48
 14 4 0 12.59 11.54
 14 -4 0 9.87 6.96
 -15 -4 0 1.42 3.58
 -15 4 0 11.18 14.27
 -15 -4 0 5.13 9.42
 15 -4 0 13.26 5.69
 15 4 0 -5.9 11.38
 -15 4 0 -3.18 12.52
 15 4 0 -8.31 16.23
 15 -4 0 -26.25 21.92
 -16 -4 0 -0.14 12.03
 -16 -4 0 3.38 15.6
 -16 4 0 -6.27 16.63
 16 4 0 -0.04 2.11
 16 4 0 -5.88 14.76
 16 -4 0 46.8 41.7
 16 -4 0 -0.42 14.54
 -16 4 0 10.75 12.04
 -17 -4 0 4.49 7.61
 -17 4 0 -4.94 10.19
 -17 4 0 -3.62 3.93
 17 4 0 1.23 5.84
 -17 -4 0 -13.18 14.52
 17 -4 0 22.87 29.27
 17 4 0 -0.39 6.22
 -17 -4 0 0.65 5.06
 17 4 0 -11.31 12.42
 -17 4 0 -1.57 5.63
 17 4 0 26.56 25.58
 17 4 0 5.14 7.26
 17 -4 0 -10.51 29.74
 -17 -4 0 4.91 4.67
 -17 4 0 -7.36 23.04
 18 4 0 50.87 17.29
 18 4 0 53.52 19.08
 -18 -4 0 60.93 18.28
 -18 -4 0 45.38 16.33
 -18 -4 0 2.08 16.08
 18 -4 0 0.18 29.14
 -18 -4 0 95.23 41.15
 -18 4 0 62.19 19.37
 18 -4 0 41.95 30.26
 -18 4 0 35.24 18.88
 -18 4 0 46.73 16.3
 -18 4 0 60.79 32.62
 18 4 0 32.11 14.77
 18 4 0 48.72 21.29
 18 4 0 49.29 24.85
 -18 4 0 42.24 17.46
 18 4 0 50.12 26.49
 18 4 0 22.38 11.64
 -18 4 0 57.85 18.94
 -18 -4 0 72.89 20.27
 -18 -4 0 62.66 18.26
 18 4 0 34.03 15.23
 -18 4 0 36.02 15.99
 -19 -4 0 -4.84 5.6
 19 4 0 12.45 16.05
 -19 -4 0 -6.72 5.53
 19 4 0 -2.1 2.91
 19 4 0 -1.83 7.53
 -19 4 0 -0.89 3.58
 19 4 0 -0.63 5.26
 -19 4 0 -5.15 6.24
 -19 -4 0 -5.62 10.57
 19 -4 0 48.36 32.99
 -19 4 0 -5.11 11.59
 19 4 0 9.81 21.16
 -19 -4 0 -0.04 4.04
 19 4 0 -0.04 4.7
 19 4 0 3.01 9.23
 -19 -4 0 1.06 4.13
 19 4 0 -6.09 8.5
 -19 4 0 3.02 4.87
 -19 4 0 -2.57 2.6
 19 -4 0 -8.71 14.63
 -19 4 0 -4.92 10.14
 -20 -4 0 22.46 11.8
 20 4 0 29.03 16.79
 -20 4 0 15.07 11.5
 20 4 0 7.07 6.81
 -20 -4 0 30.49 13.35
 20 4 0 22.87 21.83
 -20 -4 0 20.33 12.55
 20 -4 0 8.06 10.19
 -20 4 0 25.6 16.64
 20 4 0 18.59 11.48
 20 4 0 18.87 10.48
 -20 4 0 22.48 12.16
 20 4 0 32.54 16.33
 -20 -4 0 16.17 12.15
 -20 4 0 23 11.61
 -20 4 0 31.54 15.42
 -20 4 0 4.77 3.52
 20 4 0 37.85 18.97
 -21 4 0 0.76 6.12
 -21 -4 0 11.05 9.18
 -21 4 0 -26.5 13.71
 21 4 0 -2.72 11.56
 -21 4 0 -5.02 11.04
 21 4 0 -2.78 8.72
 -21 -4 0 8.2 9.98
 -21 4 0 -1.54 6.91
 21 4 0 2.99 6.14
 -21 -4 0 3.55 10.02
 21 4 0 -5.54 3.8
 21 -4 0 13.44 11.38
 21 4 0 1.56 10.78
 21 4 0 0.24 5.97
 21 4 0 5.99 6.69
 -21 4 0 8.86 11.43
 -21 -4 0 -1.28 2.56
 -22 -4 0 46.39 17.39
 -22 4 0 37.35 17.79
 -22 4 0 30.79 11.77
 -22 4 0 39.41 15.9
 -22 -4 0 49.82 18.81
 22 4 0 -0.84 14.36
 22 -4 0 27.95 14.94
 -22 -4 0 59.17 22.83
 -22 -4 0 33.39 14.41
 22 4 0 27.99 13.04
 22 4 0 34.73 17.61
 22 4 0 26.41 10.93
 22 4 0 -17.04 18.05
 -22 4 0 47.12 17.82
 -23 -4 0 -0.94 6.67
 23 4 0 10.88 10.68
 23 4 0 0.42 4.76
 -23 -4 0 -0.35 4.03
 -23 4 0 -3.63 8.66
 23 4 0 -14.66 14.14
 -23 4 0 -6.3 9.99
 -23 -4 0 -4.21 7.64
 23 4 0 -5.25 8.83
 23 4 0 5.53 10.26
 -23 4 0 0.08 8.47
 -23 4 0 7.45 8.93
 -23 -4 0 9.8 9.41
 -24 4 0 13.62 9.55
 24 4 0 6.26 4.05
 -24 4 0 -1.67 2.53
 -24 -4 0 3.86 5.3
 -24 4 0 0.64 6.65
 -24 -4 0 4.3 4.65
 -24 4 0 -0.49 7.5
 24 4 0 0.24 8.29
 24 4 0 -6.49 13.62
 24 -4 0 -1.46 10.03
 24 4 0 17.49 16.84
 -24 -4 0 7.36 7.38
 -24 -4 0 8.14 7.56
 24 4 0 -4.4 11.08
 25 4 0 -12.06 9.35
 -25 4 0 -2.05 5.98
 25 4 0 6.42 3.65
 -25 -4 0 -3.37 8.05
 25 -4 0 -4.77 13.99
 -25 4 0 -0.29 5.34
 -25 4 0 -8.23 8.09
 25 -4 0 6.47 9.1
 -25 -4 0 -0.65 5.72
 25 4 0 0.2 3.62
 -25 -4 0 -1.61 6.06
 -25 4 0 1.9 4.51
 25 4 0 6.22 6.72
 25 4 0 -7.37 2.68
 -25 -4 0 -3.42 6.12
 -26 4 0 4.81 8.44
 -26 4 0 10.59 11.81
 -26 -4 0 0.61 4.64
 26 4 0 -1.49 6.45
 26 4 0 -2.7 8.1
 26 -4 0 5.06 9.87
 26 4 0 5.31 3.94
 26 4 0 3.78 4.67
 26 4 0 3.54 8.65
 -26 -4 0 1.02 6.61
 -26 4 0 2.91 4.12
 -26 -4 0 -2.41 3.06
 26 -4 0 -4.18 9.55
 -26 4 0 -7.92 5.79
 -27 -4 0 5.31 3.86
 27 -4 0 -1.7 4.84
 27 4 0 0.9 8.37
 27 4 0 0.52 3.92
 27 4 0 -0.62 7.62
 -27 4 0 -1.98 6.54
 27 -4 0 2.13 4.06
 -27 4 0 -9.54 9.35
 -27 4 0 9.9 7.4
 -27 -4 0 -4.04 7.94
 -27 -4 0 -5.7 9.11
 -27 4 0 -4.13 8.25
 27 4 0 -5.85 7.97
 -28 -4 0 9.86 6.68
 -28 -4 0 12.8 8.37
 -28 4 0 17.42 6.32
 -28 4 0 11.39 6.24
 28 -4 0 8.69 7.28
 28 4 0 3.43 5.5
 -28 -4 0 14.71 6.85
 28 4 0 -5.09 8.05
 28 -4 0 -3.99 8.77
 28 4 0 7.54 7.38
 28 4 0 27.32 14.79
 -28 4 0 22.82 12.98
 29 4 0 -0.32 3.39
 -29 4 0 1.59 8.69
 -29 -4 0 -2.7 6.12
 29 4 0 -9.13 8.88
 29 -4 0 -5.77 5.82
 -29 4 0 3.77 2.98
 -29 4 0 -4.85 10.18
 29 -4 0 -2.57 6.92
 29 4 0 -1.54 9.25
 29 4 0 2.52 12.46
 -29 -4 0 -0.94 2.15
 -29 -4 0 19.19 12.78
 30 4 0 -8.17 8.83
 30 -4 0 8.86 6.98
 -30 4 0 20.65 10.56
 30 4 0 -0.84 4.95
 30 4 0 9.84 8.09
 -30 4 0 6.18 5.89
 30 -4 0 13.83 8.65
 30 -4 0 17.76 11.07
 -30 4 0 3.36 4.36
 30 4 0 5.96 7.99
 -30 -4 0 12.67 7.79
 -30 -4 0 22.24 10.35
 -30 -4 0 16.67 11.69
 -31 4 0 -1.77 3.27
 31 -4 0 1.53 2.09
 -31 -4 0 12.57 9.72
 31 -4 0 -6.98 7.42
 31 -4 0 6.82 3.63
 -31 -4 0 -11.94 5.31
 31 4 0 17.97 11.68
 -31 4 0 -4.73 4.38
 31 4 0 -12.17 10.36
 31 4 0 6.59 5.61
 31 4 0 -1.43 4.02
 0 5 0 2714.02 129.43
 0 5 0 2581.57 130.91
 0 -5 0 2444.43 126.25
 0 5 0 2354.39 154.49
 0 5 0 2848.43 160.45
 0 -5 0 3046.57 128.54
 0 -5 0 2766.34 106.4
 -1 -5 0 -7.56 4.94
 1 -5 0 4.03 5.81
 -1 5 0 -0.91 7.11
 -1 5 0 -0.16 4.54
 1 5 0 -0.89 5.48
 -1 -5 0 0.14 1.23
 1 5 0 3.87 3.3
 1 -5 0 1.83 6.41
 -1 5 0 -4.73 13.42
 1 5 0 -2.14 9.11
 -1 5 0 5.21 9.9
 1 5 0 5.38 6.5
 -1 -5 0 -2.1 3.22
 -1 5 0 4.74 6.85
 1 5 0 -6.36 7.63
 -2 5 0 986.87 84.63
 2 5 0 1052.74 94.23
 2 5 0 1092.98 82.77
 -2 5 0 1007.31 102.26
 2 5 0 1253.63 114.95
 -2 -5 0 1197.32 76.55
 -2 -5 0 1407.83 79.28
 2 -5 0 1188.66 70.01
 -2 5 0 880.69 92.05
 -2 5 0 1156.04 84.88
 2 5 0 1083.52 83.99
 -2 5 0 1182.19 89.39
 2 5 0 944.23 89.4
 -2 -5 0 942.35 80.74
 -3 5 0 -2.3 9.47
 -3 5 0 2.95 11.07
 3 5 0 -3.54 5.83
 -3 5 0 0.19 7.22
 3 5 0 3.4 7.38
 3 5 0 -0.58 4.92
 -3 -5 0 4.6 8.76
 -3 -5 0 -10.48 6.52
 3 5 0 0.62 4.77
 -3 5 0 -15.28 10.89
 3 5 0 3.84 5.82
 -3 5 0 -3.56 9.37
 -3 -5 0 -0.51 4.54
 3 -5 0 4.96 5.73
 -4 5 0 200.05 39.58
 -4 -5 0 218.4 37.23
 4 5 0 168.56 35.87
 4 5 0 230.09 40.88
 -4 5 0 178.44 37.7
 4 5 0 271.88 53.56
 4 5 0 195.45 37.45
 -4 -5 0 294.64 32.69
 -4 5 0 154.39 39.81
 4 5 0 167.93 33.06
 -4 -5 0 169.49 34.36
 -4 5 0 152.43 42.3
 -4 5 0 164.5 38.6
 4 -5 0 198.92 34.91
 -5 -5 0 -2.3 2.42
 5 5 0 -7.16 12.69
 5 -5 0 5.91 4.47
 -5 5 0 -2.26 7.43
 -5 5 0 1.36 12.93
 -5 -5 0 -9.3 10.19
 -5 5 0 -0.54 7.84
 -5 -5 0 -1.44 2.69
 5 5 0 -4.37 9.93
 -5 5 0 2.72 7.03
 -5 5 0 -0.87 5.36
 5 5 0 10.25 14.67
 5 -5 0 2.32 4.13
 5 5 0 0.1 6.16
 -5 -5 0 0.42 6.35
 -6 5 0 4.27 9.25
 6 5 0 4.04 8.49
 6 -5 0 12.55 10.93
 -6 -5 0 4.45 7.27
 6 -5 0 -0.31 11.89
 -6 5 0 1.58 6.8
 -6 -5 0 -6.09 9.66
 6 5 0 -2.21 5.72
 -6 -5 0 7.6 6.89
 -6 5 0 21.5 14.96
 6 5 0 2.68 6.45
 -6 5 0 6.56 9.14
 7 5 0 4.77 8.19
 7 -5 0 -2.18 2.78
 -7 5 0 0.18 4.7
 -7 5 0 7.09 8.47
 7 -5 0 -0.59 9.18
 -7 5 0 -1.96 8.03
 7 -5 0 -4.1 13
 -7 5 0 -10.05 13.82
 -7 -5 0 -6.53 10.03
 -7 -5 0 -2.63 11.63
 -7 -5 0 -4.48 8.71
 7 5 0 -1.03 6.92
 7 5 0 3.73 6.87
 -8 5 0 1114.64 107.02
 8 -5 0 994.83 122.51
 -8 -5 0 1098.71 97.48
 -8 -5 0 1483.34 121.41
 -8 -5 0 1189.69 108.51
 -8 5 0 1097.92 107.54
 -8 5 0 1018.23 99.35
 8 5 0 1047.51 92.76
 8 5 0 1196.79 106.61
 -8 5 0 1005.13 109.48
 8 -5 0 1360.99 114.31
 9 5 0 8.86 4.13
 -9 -5 0 -9.28 14.68
 -9 5 0 0.25 10.06
 9 -5 0 -0.92 14.73
 9 -5 0 1.44 7.93
 -9 5 0 4.21 5.31
 -9 -5 0 1 9.03
 9 5 0 8.92 6.71
 -9 -5 0 0.29 11.95
 -9 5 0 -4.35 4.83
 10 -5 0 1143.82 141.5
 -10 -5 0 1346.28 121.52
 -10 -5 0 1521.96 122.65
 -10 5 0 1344.17 123.6
 10 5 0 1272.07 109.24
 -10 5 0 1168.33 123.52
 10 -5 0 1587.66 138.86
 -10 5 0 1092 110.41
 -10 -5 0 1843.57 147.19
 10 5 0 1503.8 123.94
 11 5 0 -1.77 8.94
 11 -5 0 -26.75 18.83
 -11 5 0 -7.09 9.2
 -11 5 0 8.19 8.01
 11 -5 0 0.77 6.61
 -11 -5 0 2.63 7.41
 11 5 0 3.12 2.57
 -11 -5 0 -1.53 8.79
 -12 -5 0 498.13 75.12
 12 5 0 523.44 75
 -12 5 0 415.34 70.76
 -12 5 0 588.28 85.19
 12 -5 0 535.76 89.52
 12 5 0 611.71 80.79
 12 -5 0 412.64 89.53
 -12 -5 0 669.33 86.48
 -13 -5 0 -28.66 18.27
 -13 5 0 6.99 7.56
 -13 -5 0 4.52 7.72
 13 -5 0 3 11.3
 13 -5 0 2.49 4.04
 -13 -5 0 -0.23 7.14
 13 5 0 -1.16 6.14
 13 5 0 -8.2 9.91
 -13 5 0 -5.04 14.08
 14 -5 0 210.14 69.38
 -14 -5 0 239.57 51
 -14 5 0 326.75 66.47
 -14 -5 0 428.81 75.98
 14 5 0 265.32 58.44
 14 -5 0 202.19 57.76
 -14 -5 0 310.8 62.47
 14 5 0 283.63 57.81
 -14 5 0 210.82 54.74
 15 5 0 1.28 2.83
 -15 5 0 1.48 14.43
 -15 -5 0 -6.95 10.5
 -15 -5 0 -12.94 13.65
 15 -5 0 7.11 18.02
 15 -5 0 5.56 10.11
 -15 5 0 -5.09 8.5
 -15 -5 0 0.47 2.47
 15 5 0 -0.28 2.32
 16 -5 0 18.15 8.19
 16 5 0 -1.43 14.02
 -16 5 0 3.7 4.72
 16 5 0 41.24 23.58
 -16 5 0 4.14 2.03
 -16 5 0 11.25 8.98
 -16 -5 0 -13.58 18.88
 16 5 0 -4.33 8
 16 5 0 -1.56 2.73
 16 5 0 11.57 9.81
 -16 -5 0 16.86 10.52
 -16 5 0 22.69 20.26
 17 -5 0 50.85 32.45
 -17 5 0 0.1 6.14
 -17 -5 0 5.41 9.75
 -17 5 0 -4.33 9.6
 -17 5 0 8.91 11.26
 17 5 0 12.92 10.25
 17 5 0 21.89 8.81
 -17 -5 0 -0.35 4.62
 17 5 0 -7.66 1.91
 17 5 0 -3.18 6.98
 17 5 0 8.84 11.18
 17 5 0 -6.43 2.76
 -17 5 0 5.29 5.31
 -17 -5 0 1.6 2.75
 17 5 0 4.76 6.19
 -17 5 0 -11.73 8.71
 17 5 0 0.63 8.51
 -17 5 0 -7.75 7.08
 -17 5 0 -27.82 22.09
 17 -5 0 3.62 8.32
 18 5 0 21.04 10.38
 18 -5 0 -52.08 33.78
 18 -5 0 50.93 37.25
 -18 5 0 19.45 10.02
 -18 -5 0 23.79 13.24
 -18 5 0 19.47 10.46
 -18 5 0 26.04 16.26
 18 5 0 17.44 11.27
 18 5 0 10.11 9.45
 -18 5 0 10.75 8.16
 18 5 0 21.67 13.55
 -18 -5 0 19.85 11.27
 -18 -5 0 20.93 11.02
 -18 -5 0 14.39 11.16
 -18 5 0 11.59 7.72
 -18 -5 0 54.56 38.14
 18 5 0 15.13 10.19
 -18 5 0 2.96 7.43
 -18 5 0 16.41 10.8
 18 5 0 13.59 14.57
 18 5 0 33.98 19.41
 -19 -5 0 8.38 7.88
 -19 5 0 10.58 10.44
 -19 5 0 2.4 8.76
 -19 5 0 8.19 10.58
 -19 5 0 -8.61 11.13
 -19 -5 0 -0.96 6.68
 -19 -5 0 5.06 6.06
 19 5 0 -3.11 5.97
 -19 5 0 32.27 19.5
 19 5 0 -4.82 11.49
 19 5 0 5.11 6.4
 -19 -5 0 -1.54 7.85
 19 5 0 2.4 3.4
 -19 5 0 0.52 6.97
 19 5 0 4.29 3.18
 19 5 0 -8.57 15.67
 20 5 0 47.21 19.28
 -20 5 0 74.67 23.82
 -20 -5 0 67.06 22.5
 20 5 0 75.5 27.51
 -20 5 0 45.08 15.17
 -20 5 0 51 21.03
 -20 5 0 69.54 22.73
 -20 -5 0 69.64 22.38
 -20 -5 0 55.5 20.12
 20 5 0 26.1 10.81
 -20 5 0 46.15 17.72
 20 5 0 41.32 15.97
 20 5 0 38.19 17.06
 -20 -5 0 68.18 20.19
 20 5 0 61.77 29.14
 -20 5 0 64.8 22.19
 -21 5 0 0.48 5.27
 21 5 0 -7.79 6.62
 -21 5 0 14.01 14.52
 -21 5 0 -0.95 5.47
 21 5 0 3.12 7.48
 -21 -5 0 -4.98 6.23
 21 5 0 3.83 8.97
 21 5 0 5.23 10.75
 21 5 0 -6.54 13.56
 21 5 0 -3.33 6.6
 -21 -5 0 -1.98 6.75
 -21 -5 0 1.37 6.64
 -21 -5 0 -0.58 9.34
 -21 5 0 -0.64 8.98
 -22 -5 0 128.35 31.09
 -22 5 0 110.38 29.35
 -22 5 0 90.79 27.14
 22 5 0 55.14 23.7
 -22 -5 0 109.17 26.4
 -22 -5 0 80.7 26.58
 -22 5 0 64.59 22.22
 -22 5 0 59.58 19.73
 22 5 0 79.64 32.5
 22 5 0 77.19 25.35
 -22 -5 0 102.36 26.84
 22 5 0 68.14 25.3
 22 5 0 95.12 30.48
 22 5 0 57.67 21.11
 -23 5 0 2.62 9.75
 -23 5 0 1.12 3.14
 23 5 0 -3.8 5.03
 -23 5 0 1 4.8
 23 5 0 -2.02 10.09
 23 5 0 5.31 7.87
 23 5 0 10.51 14.65
 -23 -5 0 -7.39 14.74
 -23 -5 0 3.24 3.39
 -23 -5 0 2.34 8.67
 23 5 0 -18.86 17.92
 -23 5 0 4.34 4.71
 23 5 0 4.5 6.89
 -23 -5 0 -2.39 4.64
 24 5 0 38.1 19.59
 24 5 0 39.93 16.44
 -24 -5 0 92.52 25.14
 -24 5 0 59.15 19.82
 24 -5 0 45.08 18.85
 24 5 0 45.24 18.43
 24 5 0 64.56 21.92
 -24 5 0 67.76 21.77
 -24 5 0 103.62 28.35
 -24 5 0 84.29 25.77
 -24 -5 0 80.94 23.48
 -24 -5 0 79.45 24.75
 24 5 0 86.07 26.28
 -24 -5 0 80.52 26.2
 -25 5 0 -7.81 9.67
 -25 -5 0 -16.1 10.43
 -25 5 0 -4.18 8.83
 25 5 0 10.01 14.35
 -25 -5 0 -3.67 5.09
 25 5 0 -2.49 4.94
 25 5 0 5.94 2.76
 -25 -5 0 -3.78 12.97
 -25 5 0 6.63 2.23
 -25 5 0 3.95 7.12
 25 5 0 -3.99 10.91
 -25 -5 0 -2.78 4.62
 25 -5 0 0.12 11.46
 26 5 0 47.91 19.4
 26 5 0 40.59 22.98
 -26 5 0 104.69 26.94
 -26 5 0 27.45 10.55
 -26 -5 0 75.31 21.51
 -26 5 0 90.83 25.07
 -26 -5 0 80.89 22.63
 -26 -5 0 69.17 23.74
 26 5 0 44.56 18.25
 -26 5 0 66.64 20.69
 26 -5 0 48.36 18.14
 -26 -5 0 66.32 20.37
 26 5 0 59.1 20.99
 26 -5 0 20.47 11.34
 27 -5 0 -3.86 5.73
 27 5 0 -3.53 7.57
 27 -5 0 2.81 6.09
 27 5 0 -5.37 8.73
 -27 5 0 3.68 9.58
 -27 5 0 -0.72 4.19
 -27 -5 0 5.43 3.92
 27 5 0 -2.62 8.23
 -27 -5 0 -5.58 8.25
 -27 5 0 3.05 4.53
 -27 -5 0 1.83 3.51
 27 5 0 -8.15 11.75
 -28 5 0 22.13 11.59
 28 -5 0 10.12 6.57
 -28 -5 0 1.39 6.35
 28 5 0 6.47 9.72
 28 5 0 2.84 6.15
 -28 -5 0 25.29 14.61
 28 -5 0 16.42 9.57
 28 5 0 -2.16 11.24
 28 5 0 1.06 7.28
 -28 -5 0 20.31 12.51
 -28 5 0 10.94 6.33
 -28 5 0 6.74 4.59
 -29 5 0 -2.81 4.99
 -29 -5 0 -3.54 6.21
 -29 -5 0 -5.39 8.28
 29 -5 0 18.72 11.39
 29 5 0 -16.72 10.96
 29 5 0 0.03 6.56
 29 5 0 -4.62 4.82
 29 5 0 -7.51 10.66
 -29 5 0 -6.8 9.77
 29 -5 0 -0.74 3.08
 -29 -5 0 -1.57 5.93
 -30 5 0 61.67 15.99
 -30 -5 0 62.87 16.33
 -30 5 0 67.61 17.68
 30 5 0 39.12 13.72
 -30 -5 0 60.98 17.79
 30 5 0 23.97 10.42
 30 -5 0 30.68 12.16
 30 -5 0 24.91 10.69
 30 -5 0 21.88 5.08
 30 5 0 37.26 13.06
 30 5 0 9.73 8.24
 -30 -5 0 50.03 14.61
 31 5 0 3.36 4.08
 31 -5 0 -0.35 3.99
 0 6 0 633.73 82.11
 0 6 0 602.07 66.88
 0 -6 0 552.16 66.04
 0 -6 0 688.6 68.48
 0 6 0 655.5 91.64
 0 6 0 612.1 71.84
 0 -6 0 713.59 58.76
 1 -6 0 0.17 9.93
 1 -6 0 -23.68 10.63
 -1 6 0 4.82 10.04
 -1 -6 0 3.95 4.36
 -1 6 0 3.52 4.64
 -1 6 0 4.19 5.19
 1 6 0 -6.13 11.81
 -1 6 0 4.68 10.92
 1 -6 0 5.93 4.29
 1 6 0 1.88 3.4
 -1 -6 0 3.21 6.91
 1 6 0 -0.48 2.77
 -1 -6 0 -2.84 5.56
 1 6 0 -10.02 11.16
 2 6 0 1616.85 112.74
 2 -6 0 1679.97 116.36
 2 -6 0 1864.03 93.71
 -2 6 0 1826.66 121.64
 -2 6 0 1625.56 144.87
 -2 6 0 1670.63 120.77
 2 6 0 1641.94 118.14
 -2 -6 0 2194.86 113.4
 -2 6 0 1742.16 117.49
 -2 6 0 1583.23 142.18
 2 6 0 1893.55 155.8
 -2 -6 0 1670.78 115.33
 2 6 0 1830.71 131.92
 3 6 0 -1.96 8.8
 3 -6 0 12.47 9.29
 3 6 0 5.97 6.15
 3 6 0 0.63 6.73
 -3 -6 0 -9.94 7.11
 -3 6 0 -4.23 6.21
 3 6 0 10.5 11.49
 -3 6 0 -8.68 14.75
 -3 -6 0 2.84 4.99
 -3 6 0 -2.88 3.07
 -3 6 0 -2.04 9.86
 -3 -6 0 -3.69 7.77
 -3 6 0 -6.6 7.6
 3 6 0 7.06 9.73
 3 -6 0 9 10.63
 4 -6 0 456.86 77.43
 -4 6 0 573.41 72.85
 4 -6 0 587.44 62.9
 4 6 0 431.17 60.56
 4 6 0 583.9 85.18
 -4 -6 0 425.2 60.97
 4 -6 0 506.44 51.6
 4 6 0 499.67 66.4
 4 6 0 405.82 60.28
 -4 6 0 357.93 63.85
 -4 -6 0 595.47 65.71
 -4 6 0 388.09 70.89
 -4 6 0 529.7 72.27
 -5 -6 0 -1.81 5.07
 -5 6 0 -37.44 21.04
 5 -6 0 -21.5 12.17
 -5 -6 0 -3.05 10.33
 5 6 0 2.68 2.08
 -5 6 0 4.35 8.78
 -5 6 0 -2.44 11.09
 -5 -6 0 1.32 3.92
 5 6 0 5.77 11.56
 5 -6 0 15.81 9.86
 5 -6 0 2.32 8.93
 5 6 0 6.42 10.92
 -5 6 0 -0.41 9.82
 -6 6 0 17.24 14.3
 -6 6 0 6.35 11.74
 6 -6 0 -5.69 11.63
 6 -6 0 6.45 8.51
 -6 -6 0 2.66 10.32
 -6 -6 0 2.53 2.44
 -6 6 0 3.32 14.09
 6 6 0 -3.88 5.43
 -6 -6 0 4.89 6.05
 -6 6 0 -1.3 13.46
 6 6 0 13.85 15.13
 6 6 0 5.23 9.12
 7 -6 0 3.35 2.57
 -7 -6 0 -0.89 5.31
 -7 -6 0 -14.57 14.62
 -7 -6 0 9.1 8.54
 -7 6 0 5.31 13.89
 -7 6 0 1.54 3.86
 -7 6 0 -15.22 13.39
 7 -6 0 -3.01 14.43
 7 6 0 3.09 5.66
 -7 6 0 -6.05 8.75
 7 6 0 1.36 9.61
 8 6 0 15.76 13.39
 -8 -6 0 15.96 8.79
 8 6 0 23.01 14.5
 -8 -6 0 6.11 7.1
 -8 6 0 20.26 16.87
 8 -6 0 7.28 6.85
 -8 6 0 15.01 13.51
 -8 6 0 9.58 12.78
 8 -6 0 19.68 12.83
 -8 -6 0 36.36 19.29
 -9 -6 0 2.79 9.57
 9 -6 0 -7.01 4.73
 9 6 0 -1.46 11.83
 9 -6 0 12.96 6.38
 -9 6 0 -1.38 6.69
 9 6 0 -4.37 6.21
 -9 6 0 -1.28 3.41
 -9 -6 0 0.06 11.86
 -9 6 0 8.7 13.54
 -9 -6 0 -6.34 11.42
 10 -6 0 264.65 68.66
 -10 -6 0 272.2 58.35
 -10 6 0 319.37 64.86
 10 6 0 252.83 52.41
 10 6 0 314.85 61.88
 -10 6 0 252.99 58.56
 -10 -6 0 336.4 69.49
 10 -6 0 287.01 60.24
 -10 6 0 231.23 53.55
 -10 -6 0 327.54 61.46
 -11 -6 0 5.09 14.22
 11 -6 0 -14.11 22.53
 11 6 0 -4.17 9.79
 11 6 0 -6.08 9.57
 -11 -6 0 1.96 3.36
 -11 6 0 3.65 8.91
 11 -6 0 10.12 18.75
 -11 6 0 -4.63 18.84
 12 6 0 1463.05 134.61
 -12 -6 0 1729.69 147.41
 -12 6 0 1255.1 132.46
 -12 6 0 1583.5 149.09
 -12 -6 0 1473.8 138.13
 12 6 0 1847.64 154.37
 12 -6 0 1314.58 164.59
 12 -6 0 1641.27 156.41
 -13 -6 0 -3.36 7.17
 -13 6 0 -10.76 12.94
 13 -6 0 7.24 8.2
 -13 -6 0 10.51 17.89
 -13 6 0 -2.88 6.66
 13 6 0 2.09 3.07
 13 6 0 2.06 2.17
 -14 6 0 1471.43 149.94
 14 6 0 1543.85 147.69
 14 6 0 1437.43 144.25
 -14 6 0 1085.71 130.25
 -14 -6 0 1727.7 156.61
 14 -6 0 929.63 142.17
 -14 -6 0 1052.41 121.44
 -15 -6 0 -6.09 9.14
 15 6 0 3.16 6.08
 -15 6 0 3.22 1.99
 15 6 0 -27.27 13.02
 -15 6 0 -1.5 4.96
 -15 -6 0 2.29 4.72
 15 6 0 -1.67 6.76
 15 6 0 -3.13 1.79
 15 6 0 -8.35 8.91
 -15 6 0 -0.76 13.46
 -15 6 0 2.23 4.84
 15 -6 0 -3.67 19.29
 15 6 0 -16.25 15.43
 15 6 0 4.87 14.84
 -15 -6 0 -6.29 11.88
 -16 6 0 520.14 61.26
 -16 6 0 592.46 60.84
 16 6 0 715.76 75.71
 16 6 0 588.78 99.93
 -16 6 0 662.01 81.76
 -16 6 0 458.39 90.72
 -16 6 0 514.43 57.54
 16 6 0 671 88.01
 16 6 0 659.38 100.39
 -16 -6 0 621.35 58.8
 -16 6 0 475.58 56.31
 16 -6 0 442.12 105.37
 16 6 0 654.94 66.23
 -16 -6 0 765.88 110.76
 16 6 0 645.05 69.07
 -16 -6 0 614.48 61.89
 16 6 0 589.77 63.17
 -16 6 0 557.06 59.67
 -17 6 0 2.23 6.7
 -17 6 0 -9.94 6.09
 -17 -6 0 18.2 27.16
 -17 6 0 7.37 7.36
 -17 6 0 4.45 5.42
 -17 -6 0 -2.99 3.2
 17 6 0 4.9 9.53
 -17 6 0 -1.63 6.3
 -17 6 0 2.57 1.92
 -17 -6 0 -5.19 9.12
 17 6 0 -0.68 7.33
 17 6 0 7.83 9.62
 17 6 0 -9.55 9.93
 17 6 0 3.24 7.84
 -18 -6 0 191.32 37.15
 -18 6 0 131.22 35.54
 18 6 0 181.91 38.84
 -18 -6 0 162.35 31.74
 -18 6 0 139.29 30.96
 18 6 0 175.56 44.3
 -18 6 0 168.65 34.13
 -18 -6 0 166.17 32.8
 18 6 0 185.21 37.87
 18 6 0 190.2 40.77
 -18 6 0 157.09 34.57
 -18 6 0 188.49 36.3
 18 6 0 147.05 33.77
 -18 6 0 169.14 35.02
 -19 -6 0 -1.02 1.91
 19 6 0 -1.23 4.14
 -19 -6 0 2.15 6.66
 19 6 0 6.12 9.37
 -19 -6 0 4.9 5.56
 -19 6 0 0.25 6.8
 -19 6 0 -17.28 11.26
 19 6 0 -4.74 8.19
 19 6 0 3.4 8.25
 -19 6 0 -4.13 5.88
 -19 6 0 -0.59 5.92
 -19 -6 0 -10.82 8.57
 19 6 0 6.55 11.24
 -19 6 0 6.73 9.43
 20 6 0 9.78 7.37
 20 6 0 16.19 11.89
 -20 6 0 23.78 10.71
 20 6 0 17.12 11.33
 -20 -6 0 20.63 13
 20 6 0 17.7 18.08
 -20 -6 0 34.39 13.91
 -20 6 0 31.2 18.4
 -20 -6 0 25.76 13.82
 20 6 0 21.63 11.38
 -20 6 0 28.38 16.69
 -20 -6 0 35.89 15.64
 20 6 0 32.39 16.04
 -20 6 0 29.34 15.76
 -20 6 0 41.4 17.96
 21 6 0 9.21 9.67
 -21 -6 0 -6.83 9.8
 -21 6 0 4.99 5.4
 21 6 0 5.11 10.59
 -21 -6 0 -3.02 4.06
 -21 -6 0 -1.58 6.48
 21 6 0 -5.17 4.05
 -21 6 0 1.6 7.42
 21 6 0 -3.05 6.76
 21 6 0 -5.11 10.24
 -21 -6 0 1.04 9.25
 -21 6 0 -19.04 14.15
 -21 6 0 10.69 10.77
 -21 6 0 4.37 4.53
 21 6 0 -9.09 11.06
 -22 -6 0 457.83 54.98
 22 6 0 353.07 55.64
 22 6 0 317.99 48.42
 -22 6 0 533 62.6
 22 6 0 414.51 58.87
 -22 -6 0 495.07 61.88
 22 6 0 448.47 66
 -22 6 0 411.49 55.49
 -22 6 0 290.28 47.19
 -22 6 0 488.06 61.66
 22 6 0 382.44 68.67
 -22 6 0 521.69 71.58
 -22 -6 0 378.23 52.88
 22 6 0 349.03 51.67
 -22 -6 0 416.93 56.78
 -23 -6 0 -8.36 9.08
 23 6 0 -7.54 11.04
 -23 6 0 -14.04 10.48
 23 6 0 -1.76 6.44
 23 6 0 -0.84 5.2
 23 -6 0 5.38 7.58
 -23 6 0 -0.52 4.84
 -23 6 0 3.2 9.6
 -23 -6 0 6.15 7.29
 -23 6 0 -4.57 9
 23 6 0 4.91 6.89
 23 6 0 -6.27 12.32
 -23 -6 0 1.62 5.73
 -23 -6 0 -0.96 6.12
 23 6 0 -7.21 12.84
 -24 -6 0 251.26 46.99
 24 6 0 172.7 35.04
 24 -6 0 185.84 37.96
 24 6 0 212.82 40.27
 -24 6 0 359.62 50.32
 -24 -6 0 302.41 45.06
 24 6 0 155.55 40.4
 24 6 0 201.23 40.8
 -24 6 0 277.47 45.37
 -24 6 0 387.87 52.88
 -24 -6 0 347.83 50.3
 24 6 0 212.8 39.24
 24 6 0 261.23 41.73
 -24 -6 0 284.72 42.56
 -25 6 0 8.35 9.23
 25 6 0 -3.68 17.31
 -25 -6 0 -4.79 8.79
 -25 -6 0 -0.07 3.1
 25 6 0 -4.65 12.34
 -25 6 0 2.28 6.62
 -25 6 0 -3.17 8.16
 25 6 0 5.17 9.78
 25 6 0 -1.85 9.91
 25 -6 0 -1.42 2.88
 -25 -6 0 -1.14 5.92
 25 6 0 2.26 8.86
 25 6 0 -0.34 7.9
 -25 -6 0 5.15 4.48
 26 6 0 193.48 36.52
 26 6 0 115.47 34.23
 26 -6 0 143.11 30.11
 -26 6 0 236.71 39.35
 -26 -6 0 276.48 42.55
 26 6 0 161.89 32.34
 -26 -6 0 263.68 39.52
 -26 -6 0 305.25 42.65
 26 6 0 193.7 37.98
 -26 -6 0 252.81 40.83
 -26 6 0 336.43 46.26
 26 -6 0 109.37 27.11
 -27 -6 0 -6.64 10.03
 27 6 0 12.46 10.49
 -27 -6 0 -2.24 4.9
 27 -6 0 -3.06 9.69
 -27 -6 0 -4.09 5.7
 -27 -6 0 -2.84 9.7
 27 6 0 -0.68 5.66
 -27 6 0 -1.25 6.78
 27 6 0 -5.74 2.06
 27 -6 0 1.81 3.09
 -27 6 0 4.02 3.89
 27 6 0 -6.22 7
 -28 -6 0 224.81 33.29
 -28 -6 0 256.49 37.9
 28 -6 0 111.26 23.56
 28 6 0 57.01 16.75
 -28 -6 0 204.85 32.52
 -28 6 0 228.36 35.28
 28 6 0 85.32 22.07
 28 6 0 124.01 27.01
 -28 6 0 210.3 33.57
 28 -6 0 93.1 22.63
 29 6 0 -0.29 4.35
 29 6 0 10.4 8.18
 -29 -6 0 -8.68 9.62
 -29 -6 0 5.82 6.6
 29 -6 0 3.34 4.66
 -29 6 0 -3.68 3.28
 -29 6 0 -6.56 6.92
 -29 -6 0 11.48 8.73
 29 6 0 5 5.22
 -30 6 0 7.51 5.05
 30 6 0 4.1 3.55
 30 -6 0 14.05 8.98
 30 6 0 -6.08 6.16
 30 6 0 -10.26 8.94
 -30 -6 0 6.86 4.67
 0 -7 0 29.44 15.16
 0 7 0 -1.31 4
 0 7 0 9.99 11.13
 0 7 0 6.01 5.78
 0 7 0 5.05 4.53
 0 -7 0 24.97 15.16
 1 7 0 2.38 4.23
 -1 -7 0 1.57 7.61
 1 7 0 1.63 4.76
 -1 7 0 7.09 12.54
 -1 7 0 9.84 7.86
 1 7 0 -1.03 6.14
 1 -7 0 -23.73 15.8
 -1 -7 0 2.21 5.37
 -1 7 0 7.38 5.72
 -1 7 0 -5.88 6.49
 1 -7 0 -5.56 13.16
 1 -7 0 2.51 1.69
 1 7 0 10.45 16.74
 2 -7 0 9.1 8.16
 2 7 0 22.04 16.75
 -2 7 0 4.5 9.65
 2 -7 0 6.15 5.9
 -2 7 0 5.52 11.62
 2 7 0 18.89 18.2
 2 7 0 9.72 7.57
 2 -7 0 4.42 7.58
 -2 7 0 8.09 10.34
 -2 -7 0 14.59 16.68
 2 7 0 6.74 2.93
 -2 7 0 0.18 2.44
 3 7 0 -0.15 7.2
 -3 -7 0 -4.06 9.99
 3 -7 0 16.25 12.89
 -3 7 0 -1.3 2.42
 -3 7 0 -2.07 10.59
 3 7 0 -2.5 6.02
 3 -7 0 -10.4 9.87
 -3 7 0 -24.74 15.55
 -3 7 0 -2.73 9.46
 -3 7 0 0.6 8.41
 3 7 0 -3.86 4.69
 -4 -7 0 -6.03 11.6
 4 7 0 6.75 7.91
 -4 -7 0 -0.5 9.05
 4 7 0 13.72 12.96
 -4 7 0 11.28 12.03
 4 -7 0 -1.02 5.49
 4 -7 0 15.94 14.59
 -4 7 0 6.07 4.08
 -4 7 0 -6.77 6.34
 -4 7 0 0.41 5.91
 -5 7 0 0.11 5.32
 -5 7 0 -2.42 7.99
 5 -7 0 -19.18 16.6
 5 7 0 -4.07 6
 5 7 0 -4.83 8.14
 -5 -7 0 0.75 8.81
 -5 -7 0 -31.84 20.68
 -5 7 0 14.96 18.84
 -5 7 0 -9.58 13.79
 -6 7 0 2.34 3.33
 6 7 0 9.18 10.68
 -6 7 0 0.4 12.05
 -6 -7 0 0.72 8.99
 -6 -7 0 -3.14 11.24
 6 7 0 -3.04 6.02
 -6 7 0 5.99 7.81
 6 -7 0 5.61 17.33
 -7 -7 0 11.3 10.39
 -7 7 0 -3.71 17.55
 -7 7 0 -3.56 9.35
 7 7 0 -2.96 12.74
 -7 -7 0 -5.59 3.38
 7 -7 0 2.03 7.06
 -7 -7 0 3.36 12.96
 7 7 0 -1.61 8.24
 -8 7 0 67.2 28.94
 -8 -7 0 71.16 26.96
 -8 7 0 42.3 29.98
 -8 -7 0 54.15 28.34
 8 -7 0 33.05 18.23
 -8 -7 0 63.08 25.8
 8 7 0 31.22 17.58
 8 7 0 62.89 27.84
 -9 -7 0 -3.6 13.98
 9 7 0 -13.69 15.75
 9 -7 0 -7.54 18.08
 -9 -7 0 -7.94 6.2
 -9 7 0 -0.15 6.84
 -9 -7 0 -0.75 12.37
 9 7 0 -2.09 6.55
 -10 7 0 0.84 11.65
 -10 -7 0 18.28 13.18
 -10 -7 0 12.59 7.66
 10 7 0 17.78 16.46
 10 -7 0 -16.19 28.62
 10 7 0 32.18 22.11
 -10 -7 0 27.72 25.71
 -11 -7 0 -17.53 15.93
 11 7 0 3.4 7.5
 11 7 0 -6.32 3.93
 -11 7 0 -15.78 25.5
 11 -7 0 -15.11 17.77
 -11 7 0 7.86 9.9
 -12 -7 0 171.99 49
 12 7 0 198.89 50.86
 12 -7 0 93.71 39.59
 -12 7 0 216.87 57.44
 -12 7 0 150.47 48.87
 12 7 0 164.5 48.56
 -12 -7 0 105.6 38.67
 13 7 0 -0.09 3.72
 -13 -7 0 17.06 10.91
 -13 7 0 3.57 8.54
 -13 7 0 -2.63 6.66
 13 7 0 -45.48 25.48
 13 7 0 0.04 2.52
 -13 -7 0 15.05 14.25
 13 7 0 6.62 9.12
 -13 7 0 2.14 2.56
 13 -7 0 -31.33 26.49
 -13 7 0 12.51 4.65
 -14 7 0 -11.5 9.15
 -14 7 0 -0.59 5.48
 -14 7 0 -35.75 24.7
 -14 -7 0 8.11 4.58
 14 7 0 -3.43 9.24
 -14 -7 0 -6.31 23.42
 -14 -7 0 -0.58 4.15
 -14 7 0 -0.12 7.38
 14 7 0 -11.33 13.65
 14 7 0 3.01 14.63
 14 7 0 0.02 4.47
 -14 7 0 0.61 8.65
 14 7 0 -44.04 25.57
 -14 7 0 30.16 22.35
 -14 7 0 -1.5 3.75
 14 -7 0 -0.06 15.15
 14 7 0 -1.37 6.6
 -14 -7 0 66.68 31.65
 14 7 0 4.79 8.48
 14 7 0 7.9 10.29
 15 7 0 2.87 4.39
 -15 7 0 -1.83 4.84
 -15 7 0 11.25 9.75
 15 7 0 -1.64 4.43
 -15 -7 0 3.68 3.23
 -15 7 0 -3.2 4.62
 -15 -7 0 10.99 17.33
 15 7 0 5.72 3.98
 -15 7 0 -10.6 8.95
 15 7 0 20.02 11.87
 15 -7 0 23.47 23.74
 -15 7 0 -23.86 15.54
 -15 -7 0 -4.65 6.6
 -15 -7 0 20.58 18.48
 15 7 0 -4.32 8.81
 -15 7 0 -7.53 3.45
 -15 7 0 18.25 18.11
 15 7 0 8 7.81
 -16 7 0 -2.03 4.08
 -16 7 0 3.77 2.64
 -16 -7 0 6.56 8.03
 -16 -7 0 -2.24 4.22
 -16 7 0 10.24 10.24
 -16 7 0 1.99 3.09
 16 7 0 -1.55 3.18
 16 7 0 -3.01 4.44
 16 7 0 -5.35 12.08
 -16 7 0 7.52 4.03
 16 7 0 -2.56 10.97
 16 7 0 -6.96 8.48
 -16 7 0 -0.82 4.2
 -17 7 0 -4.84 10.63
 -17 7 0 -6.13 8.04
 -17 7 0 -6.22 6.87
 17 7 0 1.83 7.3
 17 7 0 10.5 7.78
 -17 7 0 -1.65 4.73
 17 7 0 -12.18 16.02
 17 7 0 11.44 8.58
 -17 -7 0 3.66 4.74
 17 7 0 12.36 13.38
 -17 7 0 7.94 12.62
 -17 7 0 -4.14 6.8
 -17 -7 0 -21.82 11.96
 -18 7 0 11.56 6.49
 -18 7 0 14.15 10.55
 18 7 0 5.92 5.23
 18 7 0 10.92 8.5
 -18 7 0 9.29 6.19
 -18 -7 0 -1.14 6.43
 -18 7 0 1.97 6.72
 18 7 0 2.38 6.81
 -18 7 0 5.6 6.67
 -18 7 0 13.04 11.21
 18 7 0 -5.64 11.58
 -18 -7 0 2.83 6.15
 18 7 0 0.69 3.06
 -19 -7 0 10.66 10.61
 -19 -7 0 -5.76 8.34
 19 7 0 -5.55 9.26
 -19 7 0 -8.82 10.52
 19 7 0 5.39 3.2
 19 7 0 -10.66 4.43
 -19 7 0 -4.68 12.9
 -19 -7 0 -0.94 1.98
 -19 -7 0 -11.9 10.6
 -19 7 0 3.43 2.92
 19 7 0 -1.37 7.66
 -19 7 0 2.26 7.01
 19 7 0 -2.54 14.51
 20 7 0 -8.42 13.43
 -20 -7 0 1.06 8.08
 -20 -7 0 -4.1 9.16
 20 7 0 -6.21 12.08
 20 7 0 1.78 11.25
 -20 7 0 -7.39 12.12
 -20 -7 0 -2.47 6.41
 20 7 0 -6.78 9.18
 -20 7 0 -6.72 5.52
 -20 7 0 -0.89 6.4
 20 7 0 -8.01 9.96
 -20 -7 0 4.32 4.32
 -20 7 0 -16.86 11.33
 -21 7 0 -2.66 8.52
 21 7 0 -8.07 8.3
 21 7 0 -16.13 14.07
 21 7 0 -11.26 13.81
 -21 -7 0 -7.23 3.66
 -21 -7 0 11.75 6.97
 -21 7 0 11.08 10.49
 21 7 0 -2.08 7.7
 -21 -7 0 -8.82 13.78
 -21 -7 0 4.31 5.21
 21 7 0 -3.86 12.91
 -21 7 0 -30.18 14.98
 -22 -7 0 16.81 12
 -22 -7 0 14.57 9.09
 -22 -7 0 8.12 6.8
 -22 -7 0 -0.9 7.47
 22 7 0 8.23 2.59
 -22 7 0 46.37 24.48
 -22 7 0 14.08 9.32
 22 7 0 17.35 9.49
 22 7 0 14.09 8.91
 22 7 0 3.48 3.25
 22 7 0 18.51 13.35
 -22 7 0 12.12 6.37
 -23 7 0 -4.17 8.1
 23 7 0 4.21 7.7
 -23 -7 0 -2.17 9.04
 23 7 0 2.05 9.56
 -23 -7 0 -5.58 8.2
 23 7 0 -5.45 5.7
 -23 -7 0 12.69 15.15
 -23 7 0 -0.29 6.44
 23 7 0 -10.26 16.63
 23 7 0 -9.73 9.05
 -23 7 0 -4.34 6.77
 -23 -7 0 -1.36 6.24
 24 7 0 53.75 21.62
 -24 -7 0 75.25 22.01
 -24 7 0 87.43 22.29
 24 7 0 70.63 21.85
 24 7 0 37.64 12.44
 24 7 0 37.36 20.33
 24 7 0 61.33 19.94
 -24 -7 0 72.63 21.93
 -24 -7 0 71.54 21.88
 -24 7 0 74.79 24.68
 -24 -7 0 106.3 28.04
 -24 7 0 55.76 19.57
 25 7 0 -0.55 3.73
 25 7 0 8.95 10.22
 -25 -7 0 0.02 5.99
 -25 -7 0 6.16 8.59
 -25 7 0 1.6 2.68
 -25 -7 0 -2.43 2.68
 25 7 0 -10.52 12.67
 -25 7 0 -1.09 4.22
 25 7 0 -7.64 8.58
 25 -7 0 8.55 8.5
 25 7 0 -1.73 8.21
 -25 -7 0 -9.99 11.43
 26 7 0 1.72 4.32
 26 7 0 -2.76 4.59
 26 7 0 -9.99 15.77
 -26 -7 0 2.42 3.64
 -26 -7 0 -1.52 7.08
 -26 -7 0 7.32 3.59
 26 -7 0 -5.47 6.93
 -26 -7 0 1.31 7.17
 26 7 0 4.19 8.76
 -26 7 0 -1.22 5.68
 26 7 0 -9.56 9.38
 -26 7 0 -3.62 6.4
 -27 -7 0 -6.3 9.1
 -27 -7 0 4.17 5.29
 27 -7 0 1.27 8.33
 27 7 0 -3.67 12.69
 -27 -7 0 -6.96 8.33
 27 7 0 -8.9 8.88
 27 7 0 -13.09 11.06
 -27 -7 0 -2.93 5.92
 -27 7 0 -10.44 9.17
 -28 7 0 -2.34 6.43
 28 7 0 4.72 4.16
 28 7 0 14.93 11.59
 28 -7 0 6.38 3.8
 -28 -7 0 21.04 11.04
 -28 -7 0 5.18 3.42
 -28 -7 0 12.59 8.61
 28 7 0 1.8 5.28
 29 -7 0 -0.76 3.01
 29 7 0 -13.78 13.62
 -29 -7 0 -3.46 6.67
 -29 7 0 2.16 1.76
 29 7 0 -7.34 10.33
 -29 -7 0 4.57 6.25
 29 7 0 -2.02 4.07
 -29 -7 0 -5.78 5.72
 0 8 0 503.9 80.2
 0 8 0 406.77 66.48
 0 -8 0 434.08 70.04
 1 -8 0 -4.17 12.36
 -1 8 0 8.96 9.41
 1 8 0 6.12 16.35
 -1 8 0 -0.69 13.32
 -1 -8 0 -33.38 19.41
 1 -8 0 12.74 13.11
 1 8 0 -1.59 9.35
 -2 8 0 241.49 55.98
 -2 8 0 154.97 46.27
 -2 -8 0 231.12 54.42
 2 -8 0 227.44 47.62
 2 8 0 229.01 51.88
 2 8 0 163.13 42.48
 2 -8 0 222.88 50.31
 -2 8 0 215.6 49.35
 -3 -8 0 5.27 10.18
 3 -8 0 -2.66 9.84
 3 -8 0 -25.11 16.22
 3 8 0 11.89 14.7
 -3 8 0 1.87 7.47
 -3 8 0 10.22 10.37
 -3 8 0 -10.37 12.1
 3 8 0 3.64 3.17
 -3 -8 0 -2.3 2.99
 -4 8 0 79.03 34.35
 4 -8 0 61.57 27.86
 -4 -8 0 97.99 33.24
 -4 -8 0 43.27 23.84
 4 -8 0 100.54 35.38
 4 8 0 96.68 33.76
 -4 8 0 109.84 41.28
 4 8 0 55.01 21.67
 -5 -8 0 -3.17 11.28
 -5 -8 0 -3.53 14.67
 5 8 0 -1.23 7.5
 5 -8 0 30.16 21.56
 -5 8 0 -5.5 12.42
 5 8 0 9.27 13.29
 5 -8 0 -22.45 16.28
 6 8 0 566.73 88.19
 -6 -8 0 473.38 75.69
 6 -8 0 485.22 78.83
 -6 -8 0 325.25 70.24
 6 8 0 360.31 65.95
 6 -8 0 462.23 89.36
 -6 8 0 545.3 89.03
 7 -8 0 -5.32 19.68
 7 8 0 -31.03 19.99
 -7 -8 0 -43.21 26.04
 7 -8 0 11.13 16.45
 -7 8 0 3.8 8.07
 7 8 0 -15.14 18.92
 -7 -8 0 13.27 18.23
 -8 -8 0 5.71 19.91
 -8 -8 0 19.86 16.46
 8 8 0 16.26 15.08
 8 8 0 -0.42 8.19
 8 -8 0 -5.87 18.66
 -8 8 0 21.41 17.78
 9 8 0 -34.35 21.48
 -9 -8 0 -2.09 11.39
 -9 -8 0 -8.89 7.75
 -9 8 0 -14.41 14.99
 9 -8 0 -15.94 17.74
 9 8 0 0.44 10.18
 10 8 0 238.14 58.92
 10 8 0 422.36 78.73
 -10 -8 0 187.03 51.13
 10 -8 0 252.41 75.21
 -10 -8 0 356.12 71.33
 -10 8 0 293.2 69.87
 11 8 0 -0.99 7.18
 -11 8 0 -1.54 8.77
 11 8 0 -6.82 8.45
 -11 8 0 11.96 12.95
 -11 -8 0 -0.63 7.84
 -11 8 0 -1.67 25.19
 11 8 0 4.87 12.78
 -11 -8 0 1.45 5.49
 11 8 0 -4.94 8.83
 11 -8 0 -39.19 28.92
 11 8 0 -6.4 7.63
 12 8 0 368.03 50.25
 12 -8 0 127.59 43.07
 -12 8 0 205.3 58.17
 12 8 0 344.21 54.59
 -12 -8 0 194.64 33.99
 -12 8 0 355.27 59.62
 -12 8 0 277.72 45.92
 -12 -8 0 333.04 71.45
 -12 -8 0 211.14 56.56
 12 8 0 431.95 85.71
 -12 8 0 345.6 47.95
 12 8 0 267.81 67.74
 12 8 0 238.63 46.27
 12 8 0 303.73 44.86
 12 8 0 317.97 45.91
 12 8 0 386.28 47.19
 13 8 0 1.4 10.17
 -13 8 0 -1.06 4.46
 13 8 0 -18.53 10.65
 13 -8 0 37.01 34.72
 -13 8 0 -68.43 35.19
 13 8 0 -8.63 14.08
 13 8 0 11.12 10.71
 13 8 0 -5.99 6.3
 13 8 0 -0.7 4.19
 -13 -8 0 13.78 9.85
 13 8 0 -61.75 31.06
 -13 -8 0 25.31 26.66
 -13 8 0 -3.3 8.61
 -13 8 0 -2.92 10.06
 -13 8 0 7.42 10.96
 -13 -8 0 13.28 19.29
 -14 8 0 451.09 56.13
 14 8 0 517.2 57.24
 14 8 0 548.08 70.91
 -14 -8 0 280.82 44.27
 -14 8 0 418.98 58.54
 -14 8 0 497.22 71.57
 14 8 0 464.67 58.66
 -14 8 0 436.63 55.18
 -14 -8 0 368.36 49.16
 -14 -8 0 229.59 61.64
 14 8 0 443.74 55.69
 14 8 0 497.82 56.44
 14 8 0 410.99 63.2
 -15 8 0 0.66 3.58
 -15 -8 0 1.38 4.04
 15 8 0 2.35 2.33
 15 8 0 -17.8 17.14
 -15 8 0 -4.41 9.17
 -15 -8 0 4.52 4.13
 -15 8 0 -4.34 7.57
 15 8 0 4.63 4.03
 15 8 0 -0.25 4.09
 15 8 0 3.74 8.61
 15 8 0 18.18 13.75
 -15 8 0 -0.34 7.53
 16 8 0 122.03 29.52
 -16 -8 0 75.64 24.1
 -16 8 0 142.9 34.01
 16 8 0 128.87 31.26
 -16 8 0 137.63 30.89
 -16 8 0 123.02 30.16
 -16 -8 0 137.01 29.11
 -16 8 0 139.06 38.49
 16 8 0 131.62 33.73
 16 8 0 126.21 34.4
 16 8 0 145.21 34.2
 16 8 0 159.62 34.14
 -17 8 0 0.45 7.11
 17 8 0 1.9 2.23
 17 8 0 -4.03 2.27
 -17 8 0 -1.73 8.7
 -17 8 0 -3.24 4.71
 -17 -8 0 2.33 4.46
 -17 -8 0 -0.13 4.75
 -17 8 0 0.75 3.44
 17 8 0 5.22 10.28
 17 8 0 -1.45 5.82
 17 8 0 -11.75 10.8
 -18 -8 0 485.82 62.44
 18 8 0 538.93 75.75
 -18 -8 0 426.65 55.28
 -18 8 0 494.89 61.97
 -18 8 0 425.3 68.75
 18 8 0 466.93 59.95
 18 8 0 482.56 63.9
 -18 8 0 442.19 57.06
 -18 8 0 480.17 61.58
 18 8 0 489.82 61.2
 18 8 0 563.77 63.42
 19 8 0 -2.61 7.8
 19 8 0 -11.12 17.08
 -19 8 0 7.48 9.48
 -19 -8 0 3.23 4.66
 -19 -8 0 -3.49 7.95
 -19 -8 0 1.79 4.44
 -19 8 0 17.06 14.54
 19 8 0 -10.93 12.93
 19 8 0 -4.37 8.17
 -19 -8 0 0.4 7.52
 19 8 0 -4.4 6.47
 -19 8 0 4.62 8.77
 20 8 0 -1.23 10.3
 -20 -8 0 -5.04 7.11
 20 8 0 9.81 12.01
 20 8 0 6.14 5.66
 20 8 0 10.2 11.26
 -20 -8 0 -4.22 7
 20 8 0 26.01 14.88
 -20 -8 0 6.33 6.84
 -20 8 0 3.67 4.48
 -20 -8 0 -0.72 10.85
 -20 8 0 17.17 12.08
 -20 8 0 0.51 4.08
 21 8 0 -0.67 8.29
 21 8 0 -0.42 9.42
 -21 -8 0 13.61 12.51
 -21 8 0 1.67 8.49
 21 8 0 12.74 10.05
 -21 8 0 -9.34 7.68
 -21 -8 0 6.49 8.29
 -21 8 0 -4.07 11.34
 -21 -8 0 -0.4 5.69
 21 8 0 6.15 7.82
 21 8 0 -3.79 10.28
 -21 -8 0 -7.79 9.25
 22 8 0 357.77 51.5
 22 8 0 416.21 59.88
 -22 -8 0 394.97 51.68
 -22 8 0 394.38 53.08
 22 8 0 149.25 33.2
 22 8 0 364.18 61.81
 -22 -8 0 467.41 58.37
 -22 -8 0 313.22 49.4
 -22 -8 0 303.93 50.56
 -22 8 0 352.68 59.88
 22 8 0 351.44 53.42
 -22 8 0 496.82 58.71
 22 8 0 423.27 56.6
 23 8 0 -7.47 3.48
 23 8 0 4.61 11.13
 -23 -8 0 0.76 11.81
 -23 -8 0 0.89 3.12
 -23 -8 0 1.37 6.5
 23 8 0 -6.74 9
 -23 -8 0 -4.85 10.6
 23 8 0 -20.84 16.75
 23 8 0 5.63 6.08
 -23 8 0 5.17 7.73
 -23 8 0 -3.3 7.06
 -24 -8 0 83.62 23.13
 24 8 0 75.42 21.44
 -24 -8 0 92.71 23.66
 24 8 0 61.75 18.45
 -24 -8 0 94.62 25.13
 24 8 0 57.68 19.61
 -24 8 0 103.26 26.9
 24 8 0 38.6 14.64
 -24 -8 0 43.83 13.48
 24 8 0 55.95 21.4
 -24 8 0 98.45 27.78
 -25 -8 0 -8.71 9.35
 25 8 0 6.26 11.12
 -25 -8 0 -2.33 4.9
 25 8 0 3.9 5.92
 25 8 0 1.28 2.13
 25 -8 0 1.03 4.71
 -25 -8 0 -3.16 5.33
 -25 8 0 -0.41 6.99
 25 8 0 10.31 9.33
 -25 -8 0 5.12 9.32
 25 8 0 -12.8 7.09
 26 8 0 137.23 27
 26 8 0 81.51 22.14
 -26 -8 0 153.94 29.59
 -26 -8 0 185.8 33.39
 -26 -8 0 120.79 25.51
 26 8 0 97.67 20.66
 -26 8 0 215.16 34.05
 26 -8 0 123.14 26.34
 -26 -8 0 205.33 32.78
 26 8 0 138.07 29.15
 -27 -8 0 -5.22 6.42
 -27 -8 0 5.24 5.71
 27 8 0 3.05 6.37
 27 8 0 2.89 5.13
 27 -8 0 1.17 4.35
 -27 -8 0 -11.08 9.29
 -27 8 0 -3.06 3.3
 -27 -8 0 -4.38 5.64
 27 8 0 6.65 5.92
 28 8 0 42.94 13.53
 -28 -8 0 126.45 23.56
 -28 -8 0 140.16 24.46
 28 8 0 80.75 20.34
 -28 8 0 154.47 25.05
 0 9 0 2990.04 213.03
 0 9 0 2477.93 181.85
 0 -9 0 2796.87 190.34
 -1 9 0 1.39 17.21
 1 9 0 8.12 12.9
 -1 -9 0 -2.51 5.02
 -1 -9 0 -4.32 12.35
 -1 9 0 5.91 9.05
 1 -9 0 -5.02 16.17
 1 9 0 -1.8 5.3
 -2 9 0 1258.46 139.41
 -2 -9 0 1134.13 121.77
 2 9 0 1092.25 126.42
 2 -9 0 1075.48 117.36
 2 9 0 912.61 111.22
 -3 -9 0 5.17 9.78
 3 -9 0 -29.6 19.55
 -3 -9 0 -0.37 10.33
 3 9 0 -2.46 8.46
 3 9 0 28.8 19.71
 -3 9 0 -0.76 4.91
 -4 -9 0 34.72 27.89
 4 -9 0 17.67 18.56
 4 -9 0 22.18 11.39
 -4 9 0 36.95 26.98
 -4 -9 0 10.85 5.68
 4 9 0 3.63 6.39
 4 9 0 13.14 13.64
 5 9 0 26.41 22.67
 -5 -9 0 4.9 13.95
 5 9 0 -0.84 8.17
 -5 -9 0 -6.02 18.96
 5 -9 0 18.23 18.62
 -5 9 0 14.5 14.9
 5 -9 0 6.22 5.12
 6 9 0 90.48 36.93
 6 -9 0 84.02 34.7
 -6 -9 0 107.57 39.14
 -6 -9 0 46.86 25
 6 9 0 92.26 40.42
 7 -9 0 4.04 17.98
 -7 -9 0 -27.36 22.06
 7 9 0 11.51 11.69
 -7 -9 0 -1 16.25
 7 9 0 -17.18 16.23
 7 9 0 10.93 8.72
 7 9 0 -2.47 2.23
 7 9 0 -17.92 11.69
 -7 9 0 -1.18 6.06
 8 9 0 912.29 70.99
 8 9 0 875.76 71.31
 8 9 0 842.25 77.86
 8 9 0 580.27 96.11
 8 9 0 878.02 119.21
 8 -9 0 683.22 106.41
 -8 9 0 880.1 92.45
 -8 -9 0 688.11 113.5
 8 9 0 686.24 74.68
 8 9 0 622.62 74.99
 8 9 0 715.27 63.88
 -8 -9 0 814.66 112.08
 -8 9 0 868.96 76.45
 -8 9 0 822.63 80.13
 8 -9 0 656.12 112.27
 -9 9 0 0.76 7.34
 9 9 0 -1.4 3.14
 9 9 0 -17.2 16.47
 9 9 0 -4.11 8.31
 9 9 0 -7.99 6.84
 9 -9 0 3.75 15.64
 -9 9 0 -4.84 3.51
 9 9 0 -43.82 26.03
 9 9 0 1.38 5.93
 -9 9 0 -22.04 13.03
 9 -9 0 -22.5 21.43
 9 9 0 -3.74 7.78
 -9 -9 0 -6.41 25.11
 9 9 0 -14.06 11.23
 -9 -9 0 5.91 12.93
 -10 9 0 768.4 77.12
 10 9 0 567.99 95.55
 10 9 0 826.36 70.04
 -10 9 0 765.7 89.31
 10 -9 0 574.36 101.05
 10 9 0 604.17 73.32
 10 9 0 737.81 73.21
 10 9 0 838.74 119.3
 -10 9 0 807.58 75.03
 10 9 0 709.4 79.16
 10 9 0 815.52 70.91
 10 -9 0 405.51 89.44
 -10 -9 0 349.7 79.1
 -10 -9 0 610.67 99.85
 11 9 0 -2.22 4.17
 -11 9 0 -0.17 5.07
 11 9 0 -11.26 13.64
 11 9 0 2.76 5.34
 11 9 0 -2.55 8.1
 11 -9 0 10.7 15.51
 11 9 0 -12.72 13.85
 -11 -9 0 1.67 11.44
 -11 9 0 -3.5 4.62
 11 -9 0 45.88 31.57
 -11 9 0 2.24 8.17
 -11 -9 0 7.44 18.33
 11 9 0 -2.58 5.02
 12 9 0 498.78 56.24
 -12 9 0 432.49 58.92
 -12 9 0 438.11 57.52
 12 9 0 419.76 57.02
 12 9 0 510.8 59.51
 12 9 0 524.8 67.49
 -12 9 0 388.41 63.15
 12 9 0 498.81 56.75
 13 9 0 -3.92 4.75
 13 9 0 6.25 7.76
 13 9 0 0.53 1.65
 13 9 0 -2.12 4.55
 13 9 0 11.87 11.9
 -13 9 0 -4.18 4.42
 -13 9 0 7.59 8.38
 -13 9 0 3.64 9.13
 -14 -9 0 162.19 31.91
 -14 -9 0 103.05 24.44
 14 9 0 265.72 41.39
 -14 9 0 214.41 47.61
 -14 9 0 222.53 42.76
 14 9 0 264.11 42.46
 14 9 0 213.24 42.53
 14 9 0 251.54 48.8
 14 9 0 171 38.17
 -14 9 0 234.24 42.18
 14 9 0 257.38 42.29
 15 9 0 0.45 4.64
 -15 9 0 2.64 4.43
 -15 9 0 1.01 3.84
 -15 9 0 -19.47 12.56
 -15 -9 0 -12.52 12.12
 15 9 0 4.76 2.78
 -15 -9 0 12.64 10.91
 15 9 0 -5.72 10.6
 15 9 0 -6.44 6.13
 15 9 0 4.09 6.39
 -16 -9 0 52.99 17.41
 16 9 0 75.4 22.11
 -16 9 0 67.47 26.08
 16 9 0 65.6 22.64
 -16 9 0 88.1 25.42
 16 9 0 70.83 23.36
 16 9 0 103.11 26.39
 16 9 0 86.04 27.38
 -16 9 0 77.85 26.81
 -16 -9 0 35.87 14.38
 -17 -9 0 -12 11.43
 17 9 0 -4.43 9.22
 -17 -9 0 1.24 6.12
 -17 9 0 1.01 7.52
 17 9 0 -5.92 12.31
 -17 9 0 -3.16 6.72
 17 9 0 -5.49 11.18
 17 9 0 4.9 5.93
 -17 9 0 5.75 8.76
 17 9 0 4.18 3.06
 18 9 0 162.81 37.3
 -18 -9 0 114.79 28.57
 18 9 0 187.53 37.52
 18 9 0 107.66 28.84
 -18 -9 0 121.71 29.54
 -18 9 0 177.74 42.57
 -18 9 0 164.98 34.8
 18 9 0 185.12 37.62
 18 9 0 221.96 41.02
 -18 9 0 158.49 33.55
 -19 -9 0 1.88 6.38
 -19 9 0 1.06 2.63
 19 9 0 3.53 4.56
 -19 9 0 9.12 9.81
 19 9 0 5.66 9.17
 19 9 0 0.86 5.99
 19 9 0 3.85 9.56
 -19 -9 0 4.46 8.16
 -19 -9 0 8.28 8.69
 19 9 0 4.7 6.37
 19 9 0 8.12 11.99
 -19 -9 0 0.4 6.97
 -20 9 0 49.39 18.75
 -20 9 0 47.4 20.72
 -20 -9 0 32.16 12.89
 20 9 0 39.7 17.04
 -20 -9 0 13.98 9.76
 20 9 0 26.57 12.49
 20 9 0 38.9 15.79
 20 9 0 69.72 23.15
 20 9 0 64.04 21.47
 -20 -9 0 19.97 8.9
 -20 -9 0 43.31 18.67
 20 9 0 44.18 20.12
 -21 -9 0 7.85 6.49
 -21 -9 0 0.12 11.19
 21 9 0 7.02 12.3
 21 9 0 -3.88 7.23
 -21 9 0 -4.09 8.76
 -21 9 0 1.97 5.29
 21 9 0 -4.37 4.13
 21 9 0 5.73 9.01
 -21 -9 0 -2.73 5.26
 -21 -9 0 -1.05 10.68
 21 9 0 14.88 11.28
 21 9 0 3.1 7.62
 22 9 0 41.15 19.43
 -22 9 0 57.73 18.06
 22 9 0 48.29 18.58
 22 9 0 55.72 18.95
 -22 9 0 48.48 17.92
 -22 -9 0 47.34 17.73
 22 9 0 63.75 21.33
 -22 -9 0 31.58 14.16
 -22 -9 0 19.57 12.04
 22 9 0 78.34 25.68
 22 9 0 29.64 15.82
 -22 -9 0 33.9 15.72
 23 9 0 -11.57 9.04
 -23 -9 0 1.44 5.07
 -23 9 0 12.91 10.69
 23 9 0 0.2 4.92
 23 9 0 14.61 10.5
 -23 9 0 -3.24 4.51
 -23 -9 0 -6.88 7.89
 23 9 0 -8.22 7.72
 -23 -9 0 5.51 9.16
 23 9 0 4.06 3.98
 -23 -9 0 6.2 4.96
 23 9 0 16.32 8.18
 -24 9 0 27.84 14.27
 24 9 0 7.73 3.69
 24 9 0 -9.09 10.5
 -24 -9 0 13.7 10.76
 -24 -9 0 13.69 10.45
 -24 9 0 17.35 14.3
 -24 -9 0 16.43 11.15
 24 -9 0 22.54 12.57
 24 9 0 34.27 14.23
 24 9 0 16.91 9.38
 -24 -9 0 -3.19 4.49
 25 9 0 -3.54 3.19
 -25 -9 0 -5.07 8.18
 25 9 0 -2.83 4.61
 25 -9 0 -0.01 2.61
 -25 -9 0 9.86 7.83
 25 9 0 -2.98 3.58
 -25 9 0 2.18 3.48
 25 9 0 6.54 8.55
 -25 -9 0 -3.86 3.26
 26 -9 0 6.41 3.12
 26 9 0 30.87 12.51
 -26 -9 0 26.06 10.28
 -26 -9 0 4.07 5.13
 26 9 0 24.26 13.15
 26 9 0 16.71 8.08
 -26 -9 0 3.04 4.62
 -26 -9 0 2.65 2.85
 26 9 0 11.71 7.8
 -26 9 0 26.64 10.74
 27 9 0 -0.86 3.35
 -27 9 0 -2.42 2.31
 -27 -9 0 6.52 6.22
 27 9 0 4.81 3.49
 -27 -9 0 -4.23 4.15
 0 -10 0 213.85 62.53
 0 10 0 341.85 45.22
 0 10 0 353.11 54.74
 0 -10 0 387.3 75.23
 0 10 0 367.15 49.46
 0 10 0 316.63 51.97
 0 10 0 340.73 77.23
 1 10 0 -1.4 2.4
 1 10 0 22.18 19.26
 -1 10 0 1.82 4.95
 1 -10 0 8.72 15.2
 1 10 0 -3.73 1.98
 -1 10 0 -7.52 9.47
 1 -10 0 29.37 23.33
 -1 -10 0 5.75 15.34
 -1 10 0 -2.91 26.03
 1 10 0 1.14 6.13
 -1 10 0 0.95 6.99
 -1 10 0 14.25 10.2
 1 10 0 -5.74 5.97
 -1 -10 0 1.26 5.55
 2 10 0 156.49 33.06
 -2 10 0 179.95 33.81
 2 10 0 212.07 41.57
 2 10 0 202.01 58.73
 -2 10 0 232.28 65.12
 2 -10 0 105.97 45.1
 -2 -10 0 96.27 40.45
 2 10 0 191.37 34.57
 -2 10 0 169.1 33.45
 -2 10 0 196.37 40.62
 -2 10 0 199.26 36.76
 2 -10 0 181.38 50.8
 2 10 0 173.1 33.34
 -2 -10 0 244.14 61.82
 2 10 0 173.49 38.58
 -3 10 0 -56.44 31.75
 3 10 0 0.47 3.01
 3 -10 0 -5.86 9.59
 3 10 0 -9.48 7.6
 -3 10 0 3.4 8.29
 3 10 0 7.2 7.94
 3 10 0 -3.42 9.1
 3 10 0 -3.6 3.09
 -3 -10 0 73.21 36.98
 -3 10 0 -3.65 8
 -3 10 0 -5.6 9.57
 -3 10 0 1.03 4.64
 -3 -10 0 -53.85 28.81
 3 10 0 8.16 3.9
 -4 10 0 39.65 17.06
 4 10 0 2.27 22.89
 -4 -10 0 60.08 29.35
 -4 10 0 52.05 17.19
 4 10 0 38.7 14.84
 -4 10 0 33.39 16.66
 4 10 0 36.11 15.6
 4 -10 0 33.78 22.08
 4 10 0 48.08 19.88
 4 10 0 20.94 12.16
 4 10 0 34.7 14.5
 -4 10 0 35.7 17.59
 4 10 0 42.14 14.54
 -4 10 0 28.44 23.31
 -4 -10 0 -49.77 30.68
 -5 -10 0 8.59 5.9
 5 10 0 3.56 10.02
 5 10 0 10.13 15.34
 5 10 0 -26.58 21.52
 5 10 0 -2.74 3.9
 5 10 0 -1.83 3.15
 5 10 0 0.49 6.01
 -5 -10 0 0.05 17.96
 5 10 0 -9.97 9.6
 -5 10 0 14.87 22.37
 -5 10 0 -2.48 4.82
 5 10 0 9.75 12.72
 -5 10 0 -1.07 6.11
 5 10 0 16.22 11.74
 -5 10 0 3.98 5.45
 -5 10 0 -6.74 6.63
 -5 10 0 -1.36 11.55
 -6 -10 0 53.48 22.41
 6 -10 0 25.39 15.36
 -6 10 0 46.14 20.25
 6 10 0 69.72 19.45
 6 10 0 47.56 18.48
 -6 10 0 77.28 23.14
 6 10 0 37.74 15.42
 6 10 0 85.04 27.46
 -6 10 0 45.69 19.45
 6 10 0 25.66 11.04
 -6 -10 0 32.55 21.8
 6 10 0 56.03 22.96
 6 10 0 55.15 31.51
 6 10 0 27.55 21.43
 -6 10 0 63.88 23.64
 -7 10 0 -0.44 6.2
 7 10 0 4.31 5.64
 7 10 0 -11.68 19.23
 7 10 0 -13.49 30.53
 -7 10 0 -2.9 5.1
 -7 -10 0 0.16 14.53
 7 10 0 -2.79 10.41
 7 -10 0 9.21 11.84
 -7 10 0 -3.48 4.28
 7 10 0 -8.89 11.93
 7 -10 0 7.95 17.82
 -7 10 0 0.82 6.32
 7 10 0 4.38 7.36
 7 10 0 17.33 10.82
 7 10 0 5.43 6.93
 -8 10 0 194.76 39.43
 8 10 0 214.83 60.77
 -8 10 0 223.51 40.96
 8 10 0 185.72 36.16
 8 -10 0 177.97 54.11
 8 10 0 243.23 39.52
 8 10 0 231 38.43
 8 10 0 201.5 39.37
 8 -10 0 137.6 39.41
 -8 10 0 172.91 41.81
 -8 10 0 164.11 33.53
 8 10 0 176.15 39.56
 -8 -10 0 152.52 51.24
 8 10 0 142.92 33
 -9 10 0 1.14 4.37
 -9 10 0 -1.46 8.94
 9 10 0 8.49 3.71
 9 10 0 2.5 4.3
 9 10 0 11.46 10.8
 9 10 0 9.94 6.43
 9 10 0 -3.97 9.12
 -9 10 0 4.7 7.12
 9 10 0 -4.88 7.95
 10 10 0 270.22 44.76
 10 10 0 263.43 46.25
 10 10 0 272.39 51.27
 -10 10 0 316.03 49.07
 10 10 0 157.09 37.5
 10 10 0 268.04 47.58
 -10 10 0 265.78 53.82
 -10 10 0 312.79 51.73
 11 10 0 -3.51 7.16
 -11 10 0 4.84 6.54
 -11 10 0 10.94 10.47
 11 10 0 -2.14 6.46
 11 10 0 -20.08 11.51
 11 10 0 -2.76 7.48
 -11 10 0 -0.73 4.33
 12 10 0 89 25.28
 12 10 0 97.42 26.45
 12 10 0 74.12 24.32
 -12 10 0 65.61 25.99
 12 10 0 116.38 29.68
 -12 10 0 84.7 25.87
 -12 10 0 78.53 24.42
 13 10 0 -9.85 8.44
 -13 10 0 -0.33 9.56
 13 10 0 -2.52 7.44
 -13 -10 0 4.22 5.36
 13 10 0 0.4 4.13
 13 10 0 -7.44 8.22
 -13 10 0 -2.6 4.73
 -13 10 0 -4.48 5.88
 13 10 0 -0.29 3.07
 -14 -10 0 37.7 13.64
 14 10 0 81.2 24.72
 14 10 0 113.75 30.8
 14 10 0 85.48 23.59
 14 10 0 88.52 28.85
 -14 10 0 51.07 23.58
 14 10 0 90.86 25.9
 -14 10 0 61.68 22.24
 -14 10 0 70.26 23.56
 15 10 0 2.13 8.03
 15 10 0 3 3.53
 15 10 0 -7.5 4.24
 15 10 0 -4.78 2.82
 -15 -10 0 -4.96 10.26
 -15 10 0 -3.01 12.72
 15 10 0 8.44 8.53
 -15 10 0 -1.26 6.61
 -15 10 0 -2.78 6.86
 -16 10 0 27.08 16.12
 -16 10 0 37.89 17.77
 -16 10 0 36 19.92
 16 10 0 41.73 17.15
 16 10 0 35.41 15.94
 16 10 0 29.9 15.4
 -16 -10 0 21.96 10.6
 16 10 0 45.38 16.95
 16 10 0 29.58 15.5
 -17 -10 0 -1.62 5.87
 17 10 0 -5.39 11.06
 17 10 0 -5.49 7.89
 17 10 0 1.16 5.76
 -17 10 0 -8.49 12.15
 -17 10 0 -0.48 12.26
 17 10 0 -0.75 3.45
 -17 10 0 -5.5 5.94
 17 10 0 0.43 3.65
 17 10 0 0.04 2.84
 -18 -10 0 3.18 5.05
 18 10 0 19.04 11.9
 18 10 0 8.46 9.02
 18 10 0 13.08 5.73
 18 10 0 7.45 3.32
 -18 10 0 4.77 3.68
 18 10 0 20.53 11.03
 -18 10 0 10.51 10.59
 18 10 0 -0.86 6.59
 -18 10 0 0.57 4.62
 19 10 0 -9.16 11.75
 19 10 0 19.65 12.1
 19 10 0 -11.74 9.42
 19 10 0 -6.99 10.49
 19 10 0 -0.55 5.24
 -19 10 0 1.24 7.79
 -19 10 0 1.53 8.42
 -19 -10 0 -13.39 10.85
 -19 -10 0 1.36 10.12
 19 10 0 5.2 6.43
 -19 -10 0 -5.54 9.86
 20 10 0 32.61 16.11
 -20 10 0 17.43 13.04
 20 10 0 27.59 10.95
 20 10 0 21.83 13.4
 -20 10 0 31 14.74
 -20 -10 0 19.35 12.62
 -20 -10 0 0.05 5.84
 -20 -10 0 27 13.56
 20 10 0 27.09 12.29
 20 10 0 24.97 14.33
 20 10 0 19.49 10.27
 21 10 0 -8.28 7.98
 -21 -10 0 -1.84 7.96
 21 10 0 4.28 6.9
 -21 10 0 -9.51 16.95
 21 10 0 -5.82 5.17
 21 10 0 0.15 4.42
 -21 10 0 2.57 5.72
 -21 -10 0 -15.49 11.3
 -21 -10 0 0.97 3.92
 21 10 0 -3.91 4.48
 21 10 0 2.79 3.93
 -22 10 0 -9.16 13.49
 -22 -10 0 1.54 6.49
 22 10 0 6.06 6.04
 -22 -10 0 -10.12 7.89
 22 10 0 2.68 6.35
 22 10 0 -9.24 13.71
 -22 -10 0 -2.22 5.48
 22 10 0 0.63 7.86
 -22 10 0 -6.13 7.29
 22 10 0 6.02 7.67
 -23 10 0 9.76 10.47
 23 10 0 -6.92 5.65
 23 10 0 -2.17 3.85
 -23 -10 0 -1.7 8.1
 23 10 0 15.43 14.17
 23 10 0 1.9 3.95
 -23 -10 0 9.51 10.58
 23 10 0 1.99 5.19
 -23 -10 0 -8.52 8.78
 -23 10 0 -2.37 5.5
 -24 -10 0 -14.48 3.68
 24 10 0 16.49 10.91
 -24 10 0 8.53 6.66
 24 10 0 0.73 9.34
 -24 -10 0 3.58 2.32
 24 10 0 16.3 11.2
 24 10 0 -1.14 8.08
 -24 -10 0 9.15 6.7
 -25 -10 0 8.35 6.03
 -25 10 0 0.35 4.31
 -25 -10 0 5.33 6.58
 25 10 0 -6.81 5.93
 -25 -10 0 0.47 3.92
 25 10 0 9.95 8.22
 25 10 0 8.7 7.07
 -26 -10 0 16.96 7.83
 -26 10 0 28.65 10.65
 0 11 0 194.91 40.29
 0 11 0 189.92 36.5
 0 11 0 238.24 66.38
 0 11 0 234.42 45.43
 0 11 0 203.47 39.56
 1 11 0 3.53 8.16
 1 11 0 -7.44 7.45
 1 11 0 -15.47 10.21
 -1 11 0 0.18 2.76
 1 11 0 4.13 2.77
 -1 11 0 -15.82 17.71
 -1 11 0 2.08 7.94
 -1 11 0 7.4 7.15
 -1 11 0 -1.43 5.67
 2 11 0 63.46 21.88
 -2 11 0 62.61 20.92
 2 11 0 69.38 24.29
 -2 11 0 51.14 20.51
 2 11 0 69.64 22.13
 -2 11 0 77.69 25.02
 2 11 0 51.36 21.31
 -2 11 0 67.09 23.71
 -3 11 0 9.85 11.6
 -3 11 0 -11.3 11.37
 -3 11 0 1.29 5.14
 3 11 0 11.65 10.4
 3 11 0 -2.19 8.59
 3 11 0 1.16 9.65
 3 11 0 -3.57 7.29
 -3 11 0 -1.11 6.22
 3 11 0 0.32 9.76
 -4 11 0 71.93 25.42
 -4 11 0 104.26 30.79
 4 11 0 81.8 25.55
 4 11 0 84.08 23.57
 4 11 0 73.73 23.71
 -4 11 0 111.38 30.34
 4 11 0 132.42 29.25
 4 11 0 86.07 28.57
 -4 11 0 119.05 28.88
 -5 11 0 17.18 16.24
 5 11 0 -6.23 6.5
 -5 11 0 -8.45 10.95
 -5 11 0 3.66 9.14
 5 11 0 1.42 3.26
 5 11 0 7.5 5.37
 -5 11 0 -2.43 7.22
 5 11 0 2.34 7.48
 -5 11 0 5.32 2.4
 -6 11 0 2.11 3.4
 -6 11 0 0.09 1.87
 6 11 0 12.42 11.49
 6 11 0 5.2 10.05
 6 11 0 11.03 10.1
 6 11 0 1.03 2.91
 -6 11 0 7.06 10.12
 -6 11 0 20.87 16.88
 7 11 0 2.29 6.49
 7 11 0 2.01 5.73
 -7 11 0 -3.56 11.77
 7 11 0 -2.76 3.29
 7 11 0 -5.51 9.97
 -7 11 0 -1.54 4.5
 -7 11 0 -4.32 8.67
 -7 11 0 -2.92 8.27
 8 11 0 0.43 8.28
 -8 11 0 13.69 10.8
 -8 11 0 25.14 16.75
 8 11 0 24.78 18.72
 8 11 0 9.54 5.01
 -8 11 0 12 12.55
 8 11 0 -0.2 4.12
 -8 11 0 8.49 6.64
 -9 11 0 7.5 12.48
 -9 11 0 3.09 5.5
 -9 11 0 0.06 9.99
 9 11 0 0.59 6.98
 9 11 0 1.37 4.18
 9 11 0 -1.96 4.5
 9 11 0 1.75 9.75
 10 11 0 -8.39 7.73
 -10 11 0 5.81 8.54
 10 11 0 -4.53 4.61
 10 11 0 -4.12 9.99
 10 11 0 6.02 7.1
 -10 11 0 -0.29 6.11
 -10 11 0 5.48 5.09
 11 11 0 -2.92 5.39
 11 11 0 10.58 10.27
 11 11 0 -6.34 8.65
 -11 11 0 -4.28 5.08
 -11 11 0 4.97 3.96
 11 11 0 -10.56 10.85
 -11 11 0 -14.22 16.66
 12 11 0 532.58 62.44
 12 11 0 625.19 67.26
 12 11 0 531.48 60.1
 -12 11 0 517.96 74.52
 -12 11 0 507.45 64.32
 -12 11 0 514.13 63.49
 13 11 0 -3.87 9.6
 -13 11 0 -4.81 7.62
 -13 11 0 -0.79 8.17
 13 11 0 -8.26 9.11
 13 11 0 5.41 4.35
 13 11 0 -9.15 7.52
 -13 11 0 -3.67 8.29
 -13 -11 0 1.28 6.6
 14 11 0 467.71 57.24
 -14 11 0 446.37 68.77
 -14 11 0 508.17 64.13
 -14 -11 0 308.74 44.3
 14 11 0 399.44 57.95
 -14 11 0 440.87 57.64
 14 11 0 486.17 60.79
 15 11 0 15.94 10.46
 15 11 0 -5.69 10.51
 -15 11 0 0.28 7.47
 15 11 0 0.11 3.92
 -15 -11 0 -4.49 9.09
 -15 11 0 -6.44 12.03
 -15 11 0 2.74 5.11
 15 11 0 2.71 4.94
 15 11 0 -6.97 8.53
 16 11 0 62.25 19.93
 -16 11 0 45.09 20.71
 16 11 0 67.25 21.67
 16 11 0 48.43 18.85
 16 11 0 57.02 20.83
 16 11 0 103.79 27.72
 -16 -11 0 30.87 14.54
 -16 11 0 43.82 17.12
 -16 11 0 55.29 19.65
 17 11 0 1.28 4.4
 -17 11 0 -10.76 10.61
 -17 -11 0 -3.46 5.49
 17 11 0 1.87 6.33
 -17 11 0 18.65 16.52
 17 11 0 8.84 7.23
 -17 11 0 -0.41 8.46
 17 11 0 -4.44 3.63
 17 11 0 0.04 5.6
 18 11 0 64.37 21.22
 -18 -11 0 11.67 5.69
 -18 11 0 38.15 15.46
 18 11 0 30.17 14.06
 -18 -11 0 22.67 15.9
 -18 11 0 26.49 12.38
 18 11 0 70.22 21.1
 18 11 0 29 13.55
 -19 -11 0 -0.93 7.36
 -19 -11 0 -3.55 3.98
 -19 11 0 3.6 7.71
 -19 11 0 -7.89 12.64
 19 11 0 -3.44 10.88
 19 11 0 -1.22 5.81
 19 11 0 -10.52 8.89
 -19 -11 0 -4.89 8.74
 19 11 0 1.39 5.35
 -20 11 0 19.51 9.09
 -20 -11 0 20.19 11.01
 20 11 0 15.76 5.14
 -20 11 0 12.84 12.14
 20 11 0 34.46 13.55
 20 11 0 16.97 3.79
 -20 -11 0 12.55 9.15
 20 11 0 13.77 9.12
 -20 -11 0 30.24 13.44
 21 11 0 5.19 7.26
 21 11 0 6.91 5.75
 21 11 0 -0.46 10.96
 -21 11 0 -4.76 3.55
 -21 11 0 -0.09 4.37
 -21 -11 0 1.11 3.99
 -21 -11 0 -3.97 12.42
 21 11 0 -11.52 5.74
 -21 -11 0 -3.53 6.82
 22 11 0 223.82 35.81
 -22 -11 0 51.03 13.72
 -22 -11 0 75.77 18.96
 -22 -11 0 32.82 13.25
 -22 11 0 133.79 29.72
 22 11 0 56.08 17.29
 22 11 0 176.45 31.4
 -22 11 0 192.35 31.65
 22 11 0 171.2 31.72
 -23 -11 0 -4.11 4.5
 -23 -11 0 0.62 3.67
 23 11 0 5.6 6.68
 23 11 0 -9.22 6.65
 23 11 0 -14.07 9.33
 -23 -11 0 9.71 8.67
 -23 11 0 -10.26 8.62
 23 11 0 1.2 6.44
 -24 -11 0 153.12 25.16
 -24 11 0 343.12 37.44
 24 11 0 296.27 37.13
 -24 -11 0 43.31 14.68
 0 12 0 152.55 37.8
 0 12 0 162.98 34.51
 0 12 0 123.27 31.69
 0 12 0 169.86 36.24
 -1 12 0 -1.1 10.85
 -1 12 0 1.81 5.87
 1 12 0 2.44 6.62
 -1 12 0 -5.84 12.62
 -1 12 0 3.95 5.48
 1 12 0 -16.12 12.21
 1 12 0 -9.11 11.73
 1 12 0 8.92 13.77
 2 12 0 213.67 41.88
 2 12 0 175.32 38.89
 2 12 0 197.48 44.77
 -2 12 0 226.77 43.34
 -2 12 0 155.89 35.54
 -2 12 0 238.59 42.19
 -2 12 0 204.4 45.17
 2 12 0 177.42 38.56
 3 12 0 2.42 3.19
 3 12 0 7.21 5.94
 -3 12 0 3.99 6.83
 -3 12 0 2.58 5.77
 3 12 0 -4.54 7.43
 3 12 0 -1.95 11.47
 -3 12 0 3.12 4.74
 -3 12 0 4.1 5.44
 4 12 0 47.59 20.37
 4 12 0 64.29 26.43
 -4 12 0 79.57 26.78
 4 12 0 95.54 27.12
 -4 12 0 110.93 28.82
 -4 12 0 62.79 21.6
 -4 12 0 92.04 26.97
 5 12 0 0.22 4.73
 -5 12 0 -4.33 11.15
 5 12 0 -2.84 3.88
 -5 12 0 -3.33 7.85
 -5 12 0 -10.25 9.91
 5 12 0 -6.12 12.31
 -5 12 0 -3.5 6.39
 -6 12 0 0.81 9.2
 6 12 0 3.7 3.17
 6 12 0 -0.28 3.25
 6 12 0 0.16 6.6
 -6 12 0 -6.92 8.47
 -6 12 0 6.65 9.87
 -6 12 0 -2.95 4.07
 -7 12 0 5.66 9.32
 7 12 0 14.8 12.57
 -7 12 0 3.52 9.19
 -7 12 0 7.05 14.48
 7 12 0 5.02 9.65
 7 12 0 1.79 3.62
 7 12 0 8.32 9.91
 -7 12 0 -2.52 2.83
 -8 12 0 164.74 36.62
 -8 12 0 161.26 38.07
 8 12 0 190.26 37.39
 8 12 0 120.96 32.54
 8 12 0 102.08 29.4
 -8 12 0 144.22 31.72
 -8 12 0 157.65 39.37
 -9 12 0 -1.02 5.73
 9 12 0 -6.37 7.55
 9 12 0 7.21 4.54
 -9 12 0 1.62 7.69
 9 12 0 0.18 3.58
 -9 12 0 5.63 6.53
 10 12 0 310.69 46.64
 10 12 0 304.01 51.11
 -10 12 0 298.78 48.95
 -10 12 0 265.36 47.84
 -10 12 0 280.89 53.73
 10 12 0 255.93 50.07
 -11 12 0 -5.1 8.62
 11 12 0 -0.42 5.23
 11 12 0 -2.65 7.31
 -11 12 0 2.99 4.28
 11 12 0 2.52 8.82
 -11 12 0 -9.87 8.72
 -12 12 0 13.45 9.63
 12 12 0 4.55 6.49
 -12 12 0 8.2 7.7
 12 12 0 11.3 6.27
 -12 12 0 5.23 6.48
 -12 -12 0 8.66 10.16
 13 12 0 -1.63 4.83
 -13 -12 0 0.8 5.64
 -13 12 0 -5.92 6.73
 -13 12 0 6.89 7.71
 -13 12 0 -0.62 5.31
 13 12 0 0.12 5.61
 -14 12 0 -1.77 9.66
 -14 -12 0 1.94 2.58
 14 12 0 -2.31 8.98
 -14 12 0 -4.82 4.52
 14 12 0 -0.76 6.27
 -14 12 0 10.83 9.38
 -15 -12 0 -1.38 6.17
 -15 12 0 10.96 10.75
 15 12 0 1.77 5.11
 15 12 0 3.01 8.18
 -15 12 0 6.54 6.58
 -15 12 0 4.04 8.49
 -16 12 0 28.66 14.29
 -16 12 0 16.06 9.42
 -16 -12 0 15.32 7.25
 16 12 0 30.2 13.76
 16 12 0 45.91 19.88
 -16 12 0 15.85 8.97
 17 12 0 -3.98 3.8
 -17 12 0 -1.86 6.57
 -17 12 0 -0.97 12.5
 -17 -12 0 -6.01 6.63
 17 12 0 -6.14 6.53
 -17 -12 0 2.06 6.14
 -18 -12 0 -11.64 10.43
 -18 12 0 -3.23 7.14
 -18 -12 0 -4.63 7.82
 -18 12 0 -1.5 8.24
 18 12 0 2.55 4.66
 -18 -12 0 3.97 4.42
 18 12 0 2.63 2.94
 -19 12 0 0.58 3.28
 -19 -12 0 6.45 7.76
 19 12 0 -2.58 3.46
 -19 12 0 -2.36 5.18
 19 12 0 6.1 5.22
 -19 -12 0 11.11 9.76
 -19 -12 0 1.08 7.28
 -20 12 0 7.17 3.53
 -20 -12 0 0.33 5.93
 -20 12 0 11.01 9.44
 -20 -12 0 0.59 3.42
 20 12 0 8.87 5.14
 20 12 0 19.15 9.84
 -20 -12 0 8.18 6.32
 -21 12 0 -2.21 5.84
 -21 -12 0 0.39 4.76
 -21 -12 0 10.81 8.49
 21 12 0 -13.28 7.44
 21 12 0 -6.43 7.68
 -21 -12 0 5.13 6.16
 -22 12 0 7.59 5.96
 -22 -12 0 3.12 6.66
 -22 -12 0 11.25 8.23
 0 13 0 145.21 36.48
 0 13 0 234.58 44.88
 0 13 0 225.69 40.4
 0 13 0 197.79 44.64
 -1 13 0 2.11 5.52
 -1 13 0 13.1 12.14
 1 13 0 -5 8.4
 -1 13 0 -0.99 2.54
 1 13 0 0.56 2.45
 -1 13 0 5.96 6.44
 1 13 0 0.12 8.51
 1 13 0 0.72 3.59
 2 13 0 22.08 14.44
 2 13 0 3.93 3.1
 -2 13 0 9.48 6.96
 -2 13 0 21.78 15.16
 -2 13 0 15.05 13.81
 -2 13 0 9.28 8.6
 2 13 0 29.85 16.76
 2 13 0 30.5 14.72
 3 13 0 -2.79 9.62
 -3 13 0 2.05 4.19
 -3 13 0 0.33 9.03
 -3 13 0 0.04 11.45
 -3 13 0 -3.33 12.21
 3 13 0 -3.7 9.76
 3 13 0 1.89 6.23
 4 13 0 9.28 3.19
 -4 13 0 10.08 8.21
 4 13 0 14.05 13.83
 -4 13 0 8.77 10.04
 -4 13 0 -1.5 11.64
 -4 13 0 11.4 8.6
 4 13 0 2.51 5.02
 5 13 0 -9.61 14.45
 -5 13 0 7 10.96
 5 13 0 -7.24 9.75
 5 13 0 -3.22 6.64
 -5 13 0 -4.96 3.66
 -5 13 0 -4.99 9.78
 -6 13 0 -1.94 9.89
 -6 13 0 -3.04 7.87
 6 13 0 1.56 6.49
 6 13 0 9.5 15.71
 6 13 0 -4.11 7.88
 -6 13 0 4.63 2.53
 7 13 0 -1.63 4.51
 -7 13 0 -5.68 10.24
 -7 13 0 0.37 3.33
 7 13 0 14.36 14.38
 -7 13 0 -6.57 11.51
 -8 13 0 96.28 27.65
 8 13 0 61.1 21.06
 8 13 0 91.03 25.24
 -8 13 0 93.2 29.65
 -8 13 0 69.9 23.43
 -8 13 0 64.52 21.78
 -9 13 0 2.39 7.81
 -9 13 0 -1.24 2.47
 -9 13 0 4.86 10.6
 9 13 0 -0.24 4.96
 9 13 0 -7.31 10.78
 -10 13 0 28.47 15.38
 10 13 0 31.17 15.1
 10 13 0 14.95 12.4
 -10 13 0 6.78 13.42
 -10 13 0 18.35 11.75
 -11 -13 0 6.62 9.61
 11 13 0 3.49 4.95
 11 13 0 -10.01 15.53
 -11 13 0 -2.96 5.47
 -11 13 0 1.83 6.89
 11 13 0 1.85 5.95
 -11 13 0 -5.2 10.93
 -12 13 0 31.65 20.49
 -12 13 0 37.04 13.79
 12 13 0 32.06 14.35
 12 13 0 50.39 19.76
 -12 13 0 39.2 15.83
 -12 -13 0 15.29 8.1
 13 13 0 5.58 6.34
 -13 13 0 -4.86 7.69
 -13 -13 0 1.59 4.81
 13 13 0 -6.37 8.26
 -13 13 0 -2.66 9.89
 -13 13 0 5.19 4.67
 -14 -13 0 22.42 2.75
 -14 13 0 36.4 14.44
 14 13 0 30.44 15.94
 14 13 0 47.33 16.17
 -14 13 0 44.3 15.84
 -14 13 0 25.46 16.32
 -15 -13 0 -0.49 2.01
 -15 13 0 -1.28 9.1
 -15 13 0 -1.72 2.47
 15 13 0 2 2.34
 15 13 0 8.49 8.28
 -15 13 0 0.45 4.98
 16 13 0 -3.63 6.52
 16 13 0 -2.34 8.51
 -16 -13 0 -0.6 4.66
 -16 13 0 5.7 9.54
 -16 13 0 9.11 9.75
 -16 -13 0 0.94 1.92
 -17 -13 0 -13.34 8.57
 -17 13 0 5 8.45
 -17 13 0 2.34 3.98
 17 13 0 8.94 7.26
 -17 -13 0 5.84 7.52
 -17 -13 0 -4.4 5.54
 -18 -13 0 1.85 5.21
 -18 13 0 -4.03 9.44
 -18 -13 0 -20.22 8.82
 -18 13 0 -0.14 8.61
 -18 -13 0 9.59 9.95
 18 13 0 0.64 2.75
 -19 -13 0 -18.74 8
 19 13 0 -5.42 3.43
 -19 13 0 -7.86 7.91
 -19 -13 0 7.6 3.52
 -19 -13 0 -10.4 7.36
 -20 13 0 1.06 2.52
 -20 -13 0 -4.03 5.19
 -20 -13 0 1.33 7.53
 0 14 0 138.12 31.67
 0 14 0 221.6 42.62
 0 14 0 248.12 41.58
 0 14 0 156 38.54
 1 14 0 -7.13 8.46
 -1 14 0 0.88 7.57
 -1 14 0 4.77 4.7
 1 14 0 0.05 10.87
 1 14 0 -3.2 5.91
 -1 14 0 -6.91 9.11
 -1 14 0 3.96 9.95
 -2 14 0 78.33 24.91
 2 14 0 86.06 30.03
 2 14 0 128.23 28.66
 -2 14 0 50.89 18.54
 -2 14 0 160.76 33.5
 -2 14 0 127.6 32.41
 2 14 0 50.71 13.62
 3 14 0 10.68 16.63
 -3 14 0 2.89 3.24
 -3 14 0 4.15 7.69
 -3 14 0 -2.35 4.81
 -3 14 0 -6 8.8
 3 14 0 -5.95 8.73
 3 14 0 4.08 6.51
 4 14 0 68.65 24.54
 -4 14 0 104.71 27.72
 -4 14 0 144.3 34.31
 -4 14 0 97.05 27.12
 4 14 0 121.43 29.36
 4 14 0 91.43 29.35
 5 14 0 -6.7 11.31
 -5 14 0 6.21 8.64
 -5 14 0 8.12 11.08
 5 14 0 0.02 2.03
 -5 14 0 -2.69 8.94
 6 14 0 15.01 10.82
 -6 14 0 27.68 14.23
 -6 14 0 25.1 12.23
 6 14 0 31.21 14.99
 -6 14 0 24.51 12.96
 7 14 0 -1.29 1.92
 -7 14 0 0.67 7.37
 -7 14 0 1.45 5.98
 7 14 0 6.5 9.75
 -7 14 0 -7.21 11.76
 -8 14 0 133.29 30.84
 -8 14 0 98.09 21.76
 8 14 0 76.76 22.96
 -8 14 0 95.3 25.45
 8 14 0 94.39 24.42
 -9 14 0 -7.63 10.45
 9 14 0 -2.22 6.23
 -9 14 0 -0.02 6.43
 -9 14 0 -1.31 6.42
 9 14 0 -15.88 10.02
 -10 14 0 280.98 48.51
 -10 14 0 281.34 42.43
 -10 14 0 200.15 36.53
 10 14 0 156.25 33.72
 10 14 0 270.75 43.12
 -11 14 0 -15.77 11.33
 -11 14 0 6.98 9.36
 11 14 0 -0.32 3.01
 -11 14 0 14.64 13.96
 11 14 0 22.62 11.69
 12 14 0 58.11 19.2
 -12 14 0 26.17 11.38
 -12 14 0 41.06 15.48
 -12 14 0 41.44 16.2
 13 14 0 -5.62 9.22
 -13 14 0 -0.9 3.6
 -13 14 0 1.38 3.36
 -13 14 0 2.67 6.17
 -14 14 0 10.57 7.65
 -14 14 0 21.49 11.36
 14 14 0 24.25 12.63
 -14 14 0 15 10
 -14 -14 0 -2.66 7.32
 -15 14 0 0.05 2.78
 15 14 0 -11.49 8.58
 -15 -14 0 -2.33 6.99
 -16 -14 0 23.6 11.96
 -16 -14 0 36.32 12.78
 16 14 0 138.28 25.28
 -16 14 0 111.49 22.8
 -17 -14 0 -5.51 7.4
 -17 -14 0 -7.76 8.55
 17 14 0 0.51 1.7
 -17 14 0 2.58 1.67
 -18 14 0 20.89 8.16
 0 15 0 1.62 3.75
 0 15 0 -5.73 8.25
 0 15 0 -5.44 8.87
 1 15 0 10.83 8.02
 -1 15 0 -2.19 3.88
 -1 15 0 -3.38 6.01
 -1 15 0 -2.3 7.46
 1 15 0 0.61 5.05
 1 15 0 -6.14 11.34
 2 15 0 -1.47 11.38
 2 15 0 -2.35 6.22
 -2 15 0 6.93 2.13
 -2 15 0 0.35 7.26
 -2 15 0 1.78 7.45
 2 15 0 0.36 7.72
 3 15 0 -0.92 5.15
 -3 15 0 -6.27 10.72
 3 15 0 0.03 2.92
 -3 15 0 -5.35 13.49
 -3 15 0 3.86 4.74
 -4 15 0 7.15 2.44
 -4 15 0 14.16 12.31
 4 15 0 7.39 4.9
 -4 15 0 17.55 12.18
 4 15 0 6.63 4.14
 -5 15 0 -2.75 8.12
 5 15 0 -0.73 3.47
 -5 15 0 -5.53 6.61
 -5 15 0 1.24 6.02
 5 15 0 -5.81 9.63
 6 15 0 5.75 4.52
 6 15 0 -0.83 10.34
 -6 15 0 10.77 7.91
 -6 15 0 8.04 6.12
 -6 15 0 8.28 9.33
 -7 15 0 -1.97 6.43
 7 15 0 -6.01 8.36
 -7 15 0 0.02 8.65
 -7 15 0 -4.53 6.04
 7 15 0 3.39 1.85
 -8 15 0 -1.48 5.93
 8 15 0 5.22 8.4
 -8 15 0 -12.51 11.65
 8 15 0 17.45 10.03
 9 15 0 5.62 13.11
 -9 15 0 1.26 5.12
 9 15 0 2.85 3.52
 -9 15 0 2.94 5.28
 -10 15 0 12.95 8.45
 10 15 0 5.72 4.77
 -10 15 0 -0.72 6.85
 11 15 0 12.53 8.63
 11 15 0 12.5 10.66
 -11 15 0 1.29 7.06
 -11 15 0 -2.61 3.52
 -12 15 0 46.44 15.35
 12 15 0 38.91 14.87
 -12 15 0 27.94 12.56
 -13 15 0 0.1 2.88
 13 15 0 -1.39 4.96
 14 15 0 77.38 18.65
 -14 15 0 70.83 17.56
 0 16 0 23.3 12.02
 0 16 0 42.46 14.54
 -1 16 0 -2.57 3.57
 1 16 0 -9.94 7.37
 1 16 0 -7.31 9.97
 -2 16 0 5.42 4.03
 2 16 0 15.38 11.18
 -2 16 0 4.88 4.08
 2 16 0 10.42 8.41
 3 16 0 -7.1 4.86
 -3 16 0 -1.24 6.37
 -3 16 0 1.09 6.09
 3 16 0 -2.31 3.1
 -4 16 0 -8.77 5.56
 4 16 0 5.77 5.81
 4 16 0 12.45 9.17
 -4 16 0 8.91 7.4
 -5 16 0 10.31 10.91
 -5 16 0 6.09 5.54
 5 16 0 5.9 7.98
 5 16 0 0.31 2.75
 -6 16 0 -8.46 10.6
 6 16 0 12.16 9.78
 -6 16 0 32.29 12.18
 6 16 0 47.86 14.04
 7 16 0 -7.24 5
 -7 16 0 -2.83 7.86
 7 16 0 -7.81 7.68
 -8 16 0 3.1 2.48
 8 16 0 8.24 6.47
 8 16 0 7.95 7.7
 9 16 0 10.9 6.97
 -9 16 0 -6.82 7.33
 -10 16 0 14.18 7.33
 10 16 0 3.42 4.69
 0 0 -1 2.02 1.91
 0 0 1 4.2 1.82
 0 0 -1 2.95 2.23
 0 0 1 2.92 1.6
 0 0 -1 6.29 2.3
 0 0 -1 1.46 2.05
 1 0 1 3.45 2.99
 1 0 -1 2.72 2.5
 1 0 1 -0.56 1.78
 1 0 -1 4.19 2.28
 -1 0 1 2.51 2.94
 -1 0 -1 1.14 2.62
 -1 0 -1 1.58 1.72
 -1 0 -1 0.83 1.63
 -1 0 1 6.59 3.88
 -2 0 -1 -0.49 2.06
 -2 0 -1 -1.08 2.47
 2 0 1 0.91 1.99
 -2 0 -1 -0.32 3.13
 -2 0 1 -0.9 1.29
 2 0 -1 1.06 2.47
 -2 0 -1 0.13 1.57
 2 0 -1 -0.03 0.94
 3 0 1 -3.09 2.52
 -3 0 1 0.4 1.66
 -3 0 -1 -0.73 2.61
 -3 0 -1 -4.18 2.64
 3 0 1 1.56 3.63
 -3 0 -1 -3.1 3.44
 3 0 -1 2.4 3.51
 -3 0 -1 -0.95 2.95
 4 0 1 3.49 2.59
 4 0 -1 -8.13 5.56
 -4 0 -1 -3.06 5.96
 4 0 -1 -0.37 2.51
 4 0 1 -2.14 3.52
 -4 0 1 -0.24 2.54
 4 0 1 2.09 4.04
 -4 0 1 6.15 5.49
 -4 0 -1 -0.04 2.88
 -4 0 -1 0.85 2.63
 -5 0 1 7.79 5.06
 -5 0 -1 1.93 3.58
 -5 0 -1 -2.78 4.85
 -5 0 -1 1.86 3.1
 -5 0 1 5.66 2.76
 5 0 1 1.23 5.06
 5 0 1 3 1.3
 5 0 -1 5.57 5.13
 5 0 1 1.01 3.81
 -5 0 -1 0.38 3.95
 -6 0 -1 0.47 0.81
 6 0 1 4.13 8.01
 -6 0 -1 -4.08 5.65
 6 0 1 -2.91 5.42
 6 0 1 -0.84 3.73
 6 0 -1 2.91 5.85
 -6 0 1 -0.35 1.17
 6 0 -1 4.97 6.42
 6 0 1 2.2 7.5
 -7 0 1 -0.55 2.91
 7 0 1 -17.17 10.92
 -7 0 1 1.22 1.5
 -7 0 -1 4.67 6.91
 7 0 1 3.69 2.21
 7 0 -1 2.98 4.66
 7 0 -1 2.33 5.57
 -7 0 -1 2.51 1.28
 7 0 1 0.5 4.78
 -7 0 -1 0.22 6.36
 -7 0 -1 5.29 6.49
 -7 0 1 -0.99 2.68
 7 0 1 6.54 7.26
 8 0 1 3.4 3.8
 -8 0 -1 0.76 0.71
 -8 0 -1 4.3 6.35
 -8 0 1 2.1 1.74
 -8 0 1 6.87 5.07
 -8 0 1 5.32 6.52
 8 0 1 3.59 6.4
 8 0 -1 -0.49 4.45
 -8 0 -1 1.18 4.6
 8 0 1 -2.51 2.63
 -8 0 -1 -1.07 3.42
 8 0 1 -0.38 3.84
 8 0 -1 0.61 7.86
 -8 0 1 -0.16 2.63
 -9 0 -1 8.77 6.52
 -9 0 -1 -0.92 3.14
 -9 0 -1 -7.35 8.48
 9 0 -1 -4.4 6.46
 9 0 1 -1.13 5
 9 0 1 -2.67 7.81
 -9 0 1 3.16 1.31
 -9 0 1 0.73 2.43
 -9 0 1 -2.73 4.93
 -9 0 -1 -2.23 1.53
 -9 0 1 2.95 1.45
 9 0 1 2.8 4.5
 9 0 -1 1.46 5.15
 9 0 1 0.04 6.96
 10 0 1 11.95 8.07
 -10 0 -1 0.23 6.41
 -10 0 1 0.58 4.66
 -10 0 1 -1.13 4.46
 10 0 1 -16.17 16.77
 -10 0 1 -0.19 5.17
 10 0 1 9.27 9.15
 10 0 1 -4.41 13.23
 10 0 -1 10.69 13.29
 10 0 -1 7.89 4.79
 -10 0 -1 1.12 5.57
 -10 0 -1 7.65 10.25
 10 0 1 -5.53 11.79
 11 0 1 11.53 15.06
 -11 0 -1 12.51 11.9
 11 0 1 2.12 4.77
 -11 0 1 -6.29 7.22
 11 0 -1 3.29 7.68
 11 0 1 3.27 6.03
 -11 0 -1 -0.24 10.99
 11 0 -1 -8.02 9.02
 11 0 1 -0.42 8.92
 -11 0 1 0.35 4.59
 -11 0 1 1.6 6.66
 11 0 1 0.6 7.25
 -12 0 1 1.68 5.18
 12 0 1 10.92 11.28
 -12 0 -1 1.94 10.62
 12 0 1 0.73 7.31
 12 0 -1 -9.96 9.61
 12 0 1 6.2 10.03
 12 0 -1 -0.06 9.64
 -12 0 -1 1.85 7.02
 12 0 1 12.25 18.45
 -12 0 1 1.42 2.6
 -13 0 1 -0.02 6.98
 13 0 -1 -24.78 16.55
 13 0 -1 -3.53 13
 13 0 1 2.47 3.35
 13 0 1 -1.16 17.42
 13 0 1 -15.94 20.02
 -13 0 -1 8.89 5.36
 -13 0 -1 -2.08 7.06
 -13 0 1 -4.5 11.72
 14 0 1 7.73 16.08
 14 0 1 7.66 4.35
 -14 0 -1 9.02 13.12
 -14 0 -1 -29.1 17.16
 14 0 -1 0.89 9.17
 -14 0 1 10.63 11.28
 14 0 1 13.07 12.12
 -14 0 1 5.84 10.95
 14 0 -1 1.7 9.57
 -15 0 -1 -8.75 10.13
 15 0 -1 4.3 14.85
 -15 0 1 -5.16 7.51
 -15 0 1 -5.96 4.03
 -15 0 -1 -6.24 13.76
 15 0 1 14.54 17.28
 15 0 -1 -6.89 4.31
 15 0 1 -5.54 13.89
 15 0 1 4.53 17.27
 -16 0 -1 -18.64 16.37
 -16 0 1 -23.46 18.09
 16 0 -1 -28.97 20.54
 -16 0 -1 1.02 6.99
 16 0 -1 12.73 20.31
 16 0 1 -1.14 9.34
 16 0 1 28.33 23.39
 16 0 1 -0.49 7.3
 17 0 1 9.39 18.83
 -17 0 1 6.64 8.88
 17 0 1 -50.89 24.88
 -17 0 -1 -7.88 17.46
 17 0 1 -10.6 23.04
 17 0 -1 7.77 9.5
 17 0 -1 -4 12.2
 18 0 1 -7.28 23.05
 18 0 -1 -32.14 23.44
 -18 0 -1 0.45 4.22
 18 0 -1 -23.88 21.67
 -18 0 1 4.76 9.32
 -19 0 1 -1.14 3.57
 -19 0 -1 -2.73 9.81
 19 0 1 0.29 11.63
 19 0 1 5.97 8.12
 -19 0 -1 2.49 1.79
 -19 0 1 2.79 4.37
 -19 0 1 -5.5 6.22
 -19 0 -1 -10.7 14.85
 -19 0 -1 2.19 6.87
 19 0 -1 -21.33 13.71
 19 0 1 -2.21 3.13
 19 0 -1 16.2 13.96
 19 0 -1 3.13 4.2
 -19 0 1 4.82 9.45
 -19 0 1 0.91 5.79
 19 0 1 6.55 17.98
 19 0 -1 -18.15 18.33
 -19 0 1 4.34 5.6
 19 0 -1 10.11 10.87
 -19 0 -1 -2.27 5.46
 -19 0 -1 -12.98 20.41
 -20 0 1 -2.08 3.89
 -20 0 1 2.17 3.54
 20 0 1 15.51 18
 -20 0 -1 -3.8 8.6
 20 0 -1 -3.05 9.41
 20 0 -1 -30.32 16.06
 -20 0 1 -0.03 3.77
 20 0 1 -9.17 9.86
 -20 0 -1 -4.65 6.77
 -20 0 -1 -4.48 7.08
 20 0 -1 10.76 12.3
 20 0 -1 17.19 19.66
 -20 0 1 -45.09 16.71
 20 0 1 -9.72 11.51
 20 0 -1 -6.35 14.72
 -20 0 1 5.76 1.82
 20 0 -1 6.21 8.05
 -20 0 1 0.38 1.43
 -20 0 -1 4.54 6.06
 20 0 1 -24.07 17.21
 -21 0 -1 -2.15 2.49
 21 0 -1 9.39 11
 21 0 -1 -1.97 2.19
 -21 0 1 -11.71 11
 -21 0 1 -1.54 2.12
 21 0 1 -0.15 7.56
 21 0 1 -18.44 17.38
 21 0 -1 -8.87 6.41
 -21 0 1 -0.63 2.57
 -21 0 -1 -16.58 10.81
 21 0 1 -4.84 5.51
 -21 0 1 1.63 5.54
 -21 0 -1 -2.5 6.31
 -21 0 -1 -1.32 3.35
 -21 0 1 -8.64 5.38
 -21 0 1 -6.27 11.77
 -22 0 1 -4.96 8.02
 22 0 -1 -6.46 10.23
 22 0 -1 -7.19 7.51
 -22 0 1 3.15 4.25
 -22 0 1 0.44 4.56
 22 0 -1 -7.42 8.59
 -22 0 1 0.24 3.73
 22 0 1 7.2 9.51
 -22 0 1 3.54 4.05
 -22 0 -1 9.52 10.87
 22 0 1 -5.6 12.03
 -22 0 -1 18.55 14.2
 -22 0 -1 13.69 8.53
 -22 0 -1 -3.54 3.08
 22 0 1 10.9 11.96
 -22 0 1 -8.45 10.81
 -23 0 1 -6.42 2.57
 23 0 1 -11.68 10.85
 23 0 -1 8.04 3.41
 -23 0 -1 -1.6 4.1
 -23 0 1 2.67 4.57
 -23 0 -1 0.42 8.89
 23 0 -1 -0.29 6.28
 23 0 1 -2.36 13.7
 -23 0 1 -1.16 5.28
 -23 0 -1 -1.34 6.26
 -23 0 1 -14.75 11.28
 -23 0 1 -0.98 3.55
 -23 0 -1 -7.47 7.49
 23 0 1 -5.37 12.32
 23 0 1 17.87 12.59
 24 0 1 -4.69 12.77
 -24 0 -1 0.22 5.65
 24 0 1 6.38 11.52
 24 0 -1 -5.08 8.53
 -24 0 1 -11.53 9.9
 24 0 1 8.05 15.27
 -24 0 -1 -3.97 10.43
 -24 0 1 -5.72 6.14
 -24 0 -1 -1.46 3.92
 24 0 1 4.92 10.38
 24 0 -1 -2.31 3.84
 -24 0 -1 -13.64 15.52
 24 0 1 -0.22 9.87
 24 0 -1 10.04 11.19
 -24 0 1 5.17 9.02
 -24 0 1 -5.65 5.78
 25 0 -1 6.01 10.46
 -25 0 -1 3.72 3.19
 -25 0 1 -3.87 6.42
 -25 0 1 9.49 8.01
 25 0 1 -6.13 6.71
 25 0 1 -11.71 11.15
 25 0 1 -6.42 7.05
 25 0 -1 -0.79 6.25
 25 0 -1 -1.2 2.72
 25 0 1 8.77 9.98
 -25 0 1 12.04 10.13
 -25 0 -1 3.23 4.82
 25 0 1 11.37 10.71
 -25 0 1 5.44 11.63
 -25 0 -1 -6.62 9.05
 -25 0 -1 14.59 12.43
 -26 0 1 -13.11 12.26
 26 0 1 1.59 6.27
 26 0 1 -1.62 4.98
 26 0 -1 -3.44 13.28
 26 0 1 -8.06 13.74
 26 0 -1 5.77 6.33
 26 0 1 1.27 9.6
 -26 0 -1 -2.88 10.16
 -26 0 -1 3.84 7.42
 26 0 1 15.84 10.63
 -26 0 -1 14.84 15.28
 -26 0 -1 0.02 4.02
 26 0 -1 6.15 9.67
 -26 0 1 4.23 4.44
 -26 0 1 3.34 5.64
 -26 0 1 -4.84 2.19
 -27 0 1 -1.89 8.74
 27 0 -1 -3.85 5.69
 27 0 -1 4.95 9.97
 27 0 1 -2.5 6.03
 -27 0 -1 -6.83 11.32
 -27 0 1 -0.86 4.14
 -27 0 1 0.2 5.95
 27 0 -1 4.45 7.91
 -27 0 1 4.39 7.74
 27 0 1 -7.58 2.54
 -27 0 -1 -0.86 4.95
 -27 0 -1 -4.12 9.93
 27 0 -1 2.94 5.89
 27 0 1 -3.56 6.08
 27 0 1 -12.58 15.7
 -27 0 -1 1.43 3.22
 28 0 -1 6.63 12.21
 28 0 1 2.05 2.81
 -28 0 -1 4.66 8.28
 -28 0 -1 -18.85 11.5
 -28 0 1 11.86 7.09
 -28 0 -1 -5.79 11.67
 -28 0 1 -4.51 11.32
 28 0 1 1.12 2.45
 28 0 -1 -3.2 5.16
 28 0 -1 -9.49 10.01
 -28 0 1 -2.83 6.11
 28 0 1 7.28 9.42
 -28 0 1 -1.55 7.63
 28 0 -1 0.58 3.25
 28 0 1 -3.45 7.37
 -28 0 -1 -0.04 9.81
 -29 0 1 -0.55 4.79
 29 0 1 -5.42 12.25
 29 0 -1 2.5 7.26
 29 0 1 -0.44 3.14
 -29 0 -1 4.75 8.02
 -29 0 1 6.57 5.62
 29 0 -1 2.17 6.49
 29 0 1 -9.74 6.82
 -29 0 1 -12.04 11.03
 -29 0 1 7.19 8.97
 -29 0 -1 3.05 5.33
 -29 0 -1 -9.54 13.11
 -29 0 -1 7.56 4.83
 29 0 -1 -0.55 7.62
 29 0 -1 -1.45 2.91
 29 0 1 -8.71 11.3
 30 0 -1 9.63 12.81
 30 0 1 13.07 10.07
 30 0 1 -15.43 11.27
 30 0 1 0.33 3.41
 30 0 1 5.26 6.87
 -30 0 -1 6.9 9.44
 -30 0 1 7.89 5.54
 -30 0 -1 -0.76 4.71
 -30 0 -1 2.84 7.83
 30 0 -1 3.16 4.07
 -30 0 -1 1.41 4.7
 -30 0 1 -13.23 12.79
 30 0 -1 8.32 8.4
 -31 0 -1 1.25 2.26
 31 0 1 -10.32 9.31
 -31 0 1 -14.87 8.88
 31 0 -1 4.3 6.35
 -31 0 1 -12.58 10.65
 31 0 -1 -2.38 5.79
 -31 0 -1 4.32 4.25
 -31 0 -1 4.3 6.73
 -31 0 -1 0.23 3.64
 31 0 1 -1.97 5
 31 0 -1 6.84 7.04
 31 0 1 15.1 8.11
 31 0 1 8.55 6.54
 -32 0 -1 -2.54 4.74
 -32 0 1 0.03 2.31
 32 0 1 -6.58 8.77
 -32 0 1 -5.91 8.5
 32 0 -1 -3.8 4.17
 32 0 -1 7.84 6.5
 0 1 1 -1.87 2.06
 0 1 1 -2.33 3.41
 0 1 -1 1.39 2.54
 0 1 -1 0.19 2.65
 0 1 -1 0.7 2.36
 0 -1 1 2.27 2.24
 0 1 -1 -3.06 2.5
 0 1 -1 1.16 1.51
 0 1 1 1.28 1.81
 0 -1 -1 1.59 1.84
 1 1 1 1235.78 60.87
 -1 1 -1 1256.92 52.52
 -1 -1 1 1370.45 33.33
 1 -1 -1 1360.78 59.14
 1 1 -1 1512.17 57.97
 -1 1 -1 1402.9 55.79
 1 1 -1 1487.96 46.72
 -1 1 1 1501.33 59.26
 -1 1 -1 1407.9 43.43
 -1 1 1 1645.39 71.46
 1 1 -1 1661.95 60.21
 1 1 -1 1472.09 59.83
 -1 1 -1 1631.8 71.29
 -1 -1 -1 1192.81 44.85
 -1 -1 -1 1319.06 55.16
 -1 -1 1 1640.73 69.35
 1 -1 1 1141.46 44.82
 -1 1 -1 1455.95 66.19
 -1 1 1 1715.14 59.4
 -1 -1 1 1584.03 62.17
 -1 1 -1 1550.95 67.22
 1 1 1 1675.82 67.48
 2 -1 -1 240.5 29.53
 -2 1 -1 308.36 33.78
 -2 -1 1 268.29 19.16
 2 -1 1 214.02 25.96
 2 1 1 282.86 27.43
 2 1 1 218.39 28.18
 2 -1 1 196.13 16.73
 -2 1 -1 222.81 19.46
 -2 -1 1 268.22 28.62
 -2 -1 -1 204.08 22.15
 -2 1 1 235.25 21.2
 -2 1 -1 230.22 27.86
 2 1 -1 273.83 24.65
 -2 1 -1 268.15 25.66
 -2 -1 -1 265.2 20.93
 2 1 -1 309.02 19.9
 -2 1 -1 248.19 28.86
 2 -1 -1 232.17 26.72
 -2 1 1 290.47 22.31
 -3 1 1 1.77 1.69
 3 1 1 1.17 2.84
 3 -1 1 11.08 7.91
 -3 -1 1 1.05 2.14
 -3 -1 -1 1.48 2.48
 -3 1 -1 1.84 5.47
 3 1 -1 1.52 1.31
 -3 1 -1 -1.14 2.11
 3 -1 -1 -1.29 4.2
 3 -1 1 -0.74 2.91
 3 1 -1 0.62 4.54
 3 1 1 0.61 5.03
 -3 1 1 -0.56 2.92
 3 1 -1 1.45 2.88
 3 -1 1 -0.45 0.77
 3 -1 -1 1.3 3.08
 3 -1 1 1.49 1.69
 -3 -1 -1 4.23 2.77
 -3 -1 -1 2.9 3.79
 -3 1 -1 -1.37 2.34
 3 -1 -1 -1.72 3.09
 -3 -1 -1 2.69 2.01
 -3 1 -1 0.7 1.98
 4 1 -1 427.69 39.69
 -4 1 1 352.21 31.95
 -4 1 1 369.44 21.76
 -4 1 1 392.76 38.58
 -4 -1 -1 336.44 33.11
 4 -1 -1 377.78 39.6
 4 -1 1 365.78 39.55
 -4 -1 -1 424.75 37
 -4 1 -1 423.44 38.6
 4 1 -1 455.27 25.71
 -4 1 1 386.75 23.23
 4 -1 1 266.98 18.75
 -4 -1 -1 312.79 32.35
 -4 -1 -1 331.07 16.23
 4 1 1 352.24 37.97
 4 1 1 326.22 33.8
 -4 1 -1 320.75 28.13
 -4 -1 1 409.86 32.59
 -4 1 -1 507.2 49.63
 4 1 1 384.64 39.7
 4 -1 1 349.66 36.43
 -4 1 -1 318.27 31.27
 4 -1 -1 354.25 34.41
 -5 1 -1 829.26 70.38
 5 -1 1 789.74 61.34
 5 -1 1 853.16 58.81
 5 1 1 823.66 53.26
 -5 1 1 898.12 54.04
 5 1 -1 978.97 43.27
 -5 1 -1 1060.09 64.92
 -5 1 1 814.89 29.99
 -5 1 -1 732.96 52.63
 5 1 1 902.16 64.26
 -5 1 1 842.87 38.15
 -5 1 -1 778.7 49.33
 5 -1 -1 852.99 62.86
 -5 -1 1 979.25 56.44
 -5 -1 -1 766.29 54.67
 5 1 1 857.55 64.57
 -5 -1 -1 983.66 61.04
 6 -1 1 1365.43 75.95
 -6 1 -1 1282.63 69.67
 6 1 1 1331.73 72.18
 -6 -1 -1 1179.15 81.72
 6 1 1 1314.28 90.13
 -6 -1 1 1468.43 75.09
 -6 -1 -1 1488.09 81.35
 -6 1 1 1530.92 72.14
 -6 1 1 1234.65 77.47
 -6 1 1 1390.8 78.84
 -6 -1 -1 1136.77 69.1
 6 1 1 1214.97 80.3
 -6 1 -1 1383.31 92.17
 -6 1 1 1440.76 56.76
 6 -1 1 1316.28 84.26
 -6 1 -1 1575.49 83.76
 6 -1 -1 1397.15 86.12
 7 -1 -1 60.41 21.21
 7 1 1 60.46 20.95
 -7 -1 -1 58.05 12.64
 7 1 1 73.5 19.84
 -7 -1 -1 70.13 20.5
 7 1 -1 83.44 22.94
 7 -1 -1 110.94 27.93
 -7 -1 1 91.65 19.8
 7 1 -1 95.12 22.45
 -7 1 1 80.35 20.2
 -7 -1 -1 56.28 17.39
 -7 1 1 92.45 17.79
 -7 -1 -1 82.4 20.19
 7 1 1 73.41 23.59
 -7 1 1 82.4 22.63
 7 -1 1 77.39 25.23
 7 1 1 59.2 19.42
 -7 1 1 80.76 15.01
 7 1 1 91.58 15.25
 -7 1 -1 87.41 23.03
 7 -1 1 79.54 19.46
 -7 -1 1 88.82 20.03
 -7 1 -1 56.99 19.4
 7 -1 1 62.62 18.51
 8 -1 -1 4436.41 187.29
 8 1 1 3721.96 172.73
 -8 1 1 4255.88 124.79
 8 1 1 4472.75 105.74
 -8 -1 -1 4021.47 155.12
 -8 1 1 4119.67 146.51
 -8 1 -1 3506.72 138.81
 8 -1 -1 4309.97 185.52
 8 -1 1 3697.83 175.97
 8 -1 1 3750.91 158.16
 -8 1 -1 3483.97 157.59
 -8 -1 -1 4315.13 171.61
 -8 -1 1 4535.76 151.4
 -8 -1 -1 3707.1 144.2
 -8 -1 1 4345.04 150.94
 -8 1 1 3928.37 113.49
 -8 1 1 4329.82 164.2
 8 -1 1 4223.11 144.76
 8 1 -1 4293.83 174.36
 8 1 -1 4604.19 162.8
 8 1 1 3609.6 155.84
 -8 -1 1 4627.75 113.59
 8 1 1 4107.23 145.42
 8 1 1 4103.79 176.16
 -8 -1 -1 2671.39 84.39
 9 1 -1 144.55 33.33
 -9 1 1 136.36 33.19
 -9 -1 1 175.53 23.39
 9 1 1 154.61 33.68
 -9 -1 -1 146.54 30.86
 9 1 1 147.35 19.02
 -9 -1 -1 146.3 30.91
 9 1 1 133.6 35.61
 9 1 -1 202.78 36.23
 -9 -1 -1 141.76 32.83
 9 -1 -1 93.66 32.28
 9 -1 1 145.35 32.21
 -9 1 -1 130.57 29.24
 -9 -1 -1 109.27 17.33
 -9 1 1 170.5 30.72
 -9 1 1 173.5 25.76
 9 1 1 152.13 36.19
 -9 1 1 6 8.53
 -9 1 1 198.05 26.7
 9 1 1 -6.49 8.63
 9 -1 -1 181.74 40.78
 -9 -1 1 151.69 29.34
 9 -1 1 147.68 37.15
 -9 -1 1 159.37 29.87
 -9 1 -1 125.26 31.32
 9 -1 1 157.99 29.2
 9 1 1 171.32 31.5
 -10 1 1 279.26 48.19
 -10 1 -1 213.85 42.83
 -10 1 -1 293.47 45.08
 10 1 1 279.46 54.12
 10 -1 1 315.16 51.89
 10 -1 -1 319.84 57.64
 -10 -1 -1 278.5 46.73
 -10 -1 1 321.45 45.62
 -10 1 1 321.34 37.47
 10 1 1 317.85 55.72
 -10 -1 -1 219.36 25.4
 10 1 1 320.12 46.51
 10 1 1 303.99 47.78
 10 1 -1 403.83 53.92
 10 -1 1 369.83 47.16
 10 1 -1 324.84 53.43
 -10 1 1 294.08 46.06
 10 -1 -1 334.43 58.26
 -10 -1 1 340.36 44.96
 -10 1 1 354.94 37.99
 10 -1 1 293.12 55.75
 -10 -1 -1 340.38 53.63
 -10 1 1 344.6 44.93
 -10 -1 -1 275.96 46.22
 11 1 1 108.59 28.3
 -11 1 1 127.1 30.34
 11 -1 1 102.82 35.66
 11 1 1 104.44 31.83
 11 -1 -1 136.2 41.94
 -11 1 1 133.08 25.31
 -11 -1 -1 90.28 33.41
 11 -1 1 146.3 30.88
 11 1 1 118.97 29.02
 -11 -1 1 175.03 34.19
 11 -1 1 92.49 33.64
 11 1 -1 162.96 36.16
 11 1 -1 151.16 38.65
 11 -1 1 110.17 33.31
 -11 1 -1 88.58 28.57
 -11 1 1 112.68 31.28
 -11 -1 1 132.51 32.08
 11 -1 -1 136.21 41.27
 -11 1 1 121.61 29.53
 -11 -1 -1 95.34 27.43
 -11 -1 -1 127.38 31.69
 -11 1 -1 123.11 33.3
 12 -1 1 -2.28 11.91
 12 -1 1 6.47 12
 12 -1 1 10.8 6.69
 -12 1 1 8.53 5.01
 -12 -1 1 9.36 10.06
 -12 -1 1 11.72 9.21
 -12 1 1 5.35 2.85
 -12 1 1 6.84 8.52
 -12 -1 -1 2.32 11.01
 -12 1 1 0.1 3.85
 12 -1 -1 7.56 14.21
 -12 -1 1 13.63 13.61
 12 -1 -1 21.26 20.44
 12 1 -1 4.22 10.58
 12 -1 1 8.6 9.93
 -12 1 -1 9.65 11.49
 -12 -1 -1 -2.07 9.02
 12 1 -1 3.28 5.34
 12 1 1 -11.14 13.02
 12 1 1 3.97 5.8
 12 1 1 2.77 6.65
 13 1 -1 51.6 23.12
 -13 -1 -1 39.86 18.55
 13 1 1 56.78 27.02
 -13 1 1 45.43 17.03
 13 -1 1 35.88 19.68
 -13 -1 1 38.35 18.3
 13 -1 -1 54.67 28.74
 13 1 -1 53.7 26.36
 13 -1 1 71.07 33
 -13 -1 -1 57.95 28.15
 13 -1 1 43.89 25.7
 13 1 1 28.93 17.82
 -13 1 1 47.12 23.76
 -13 -1 1 40.92 22.42
 -13 -1 1 38.02 19.62
 -13 1 -1 44.52 21.79
 13 -1 -1 45.09 28.49
 13 1 1 44.52 19.41
 14 -1 1 11.45 6.63
 14 -1 1 15.81 3.93
 -14 -1 1 17.46 12.71
 -14 -1 1 26.46 18.23
 -14 1 1 13.69 6.23
 14 1 -1 31.39 16.79
 -14 1 1 16.38 12.51
 -14 1 -1 18.16 10.04
 14 1 1 22.71 6.31
 14 -1 -1 18.43 17.76
 14 1 1 15.77 8.92
 -14 -1 -1 2.9 12.82
 14 1 -1 17.5 13.72
 14 -1 -1 24.86 18.23
 14 1 1 19.92 12.36
 -14 -1 -1 20.22 15.02
 15 -1 1 10.14 17.34
 -15 -1 1 9.09 17.93
 15 -1 -1 0.61 17.68
 15 1 -1 11.61 16.84
 -15 -1 1 14.15 12.2
 15 1 1 -0.73 7.66
 15 1 1 15.02 11.9
 15 -1 1 4.27 6.96
 15 -1 1 9.77 16.38
 15 -1 -1 7.41 17.95
 -15 1 -1 3.12 4.27
 -15 -1 -1 3.82 4.72
 -15 1 1 -20.11 16.04
 15 1 -1 5.57 5.48
 -15 -1 -1 9.2 12.98
 16 -1 1 230.61 60.45
 -16 -1 1 275.67 63.55
 16 -1 1 319.03 76.87
 -16 1 -1 231.85 57.24
 16 1 1 321.83 61.85
 16 1 -1 351.1 78.94
 16 1 -1 305.25 62.35
 -16 1 1 342.66 69.48
 -16 -1 -1 281.25 65.36
 -16 -1 -1 276.38 62.32
 16 -1 -1 266.16 70.77
 16 1 1 334.08 74.44
 16 -1 -1 205.94 58.87
 -17 -1 1 62.02 32.16
 -17 1 1 32.1 10.76
 17 1 1 102.22 37.42
 -17 1 -1 57.09 26.6
 17 1 -1 73.31 29.17
 17 -1 1 49.69 31.02
 17 1 1 52.6 33.99
 17 -1 -1 33.69 24.21
 -17 -1 -1 90.13 35.66
 17 -1 -1 51.05 25.77
 17 1 -1 56.41 31.47
 -17 -1 -1 56.45 27.56
 17 -1 1 58.72 35.35
 -18 1 -1 1430.58 151.24
 -18 -1 1 1405.95 155.6
 -18 -1 -1 1690.38 170.01
 18 1 -1 1072.68 128.98
 18 -1 -1 1050.15 144.59
 18 -1 1 1432.75 176.69
 18 1 1 1415.13 171.51
 18 -1 1 937.83 134.58
 18 -1 -1 1472.52 175.34
 -18 1 -1 1304.39 148.86
 -18 1 1 1166.83 139.48
 18 1 1 1156.74 136.94
 -18 -1 -1 1307.13 147.63
 18 1 -1 1387.59 171.18
 -19 1 -1 4.31 5.2
 19 -1 1 -51.34 34.53
 19 1 1 -25.46 23.9
 19 1 1 -14.43 13.15
 19 -1 -1 -25.83 15.49
 19 1 -1 2.48 6.84
 19 -1 1 -5.26 4.65
 19 1 1 -5.17 7.95
 -19 -1 1 -1.34 7.9
 -19 1 1 -4.92 5.9
 -19 1 1 -6 8.62
 -19 -1 1 9.13 8.83
 -19 -1 -1 -0.8 2.54
 -19 1 1 3.59 1.97
 19 -1 -1 -6.12 16.64
 -19 1 -1 2.18 3.86
 -19 1 1 -15.62 9.32
 -19 1 -1 7.48 10.42
 -19 1 -1 0.07 4.3
 -19 -1 -1 0.21 2.63
 -19 1 -1 4.69 1.97
 -19 1 1 6.7 9.32
 19 1 -1 -5.89 12.24
 19 -1 -1 41.42 29.02
 -19 -1 -1 1.03 6.13
 19 -1 1 -22.23 21.82
 -19 -1 -1 2.77 5.73
 19 1 1 -9.1 13.49
 -19 -1 -1 -9.04 9.36
 -19 -1 1 7.29 14.08
 19 1 -1 10.91 11.63
 -19 1 1 -1.84 5.89
 19 -1 1 -2.5 9.54
 19 -1 -1 15.74 28.85
 -19 1 -1 15.53 23.82
 -19 1 -1 -15.2 9.23
 -19 -1 1 -6.89 7.28
 -19 -1 1 -6.47 9.98
 19 1 1 9.72 5.96
 19 -1 -1 -0.92 4.88
 -19 -1 1 -34.26 14.94
 19 1 -1 7.93 8.61
 19 1 -1 4.13 2.57
 -19 1 1 0.29 5.4
 -19 1 -1 -73.94 35.26
 19 1 -1 5.71 5.36
 19 1 -1 -7.7 12.73
 20 1 -1 751.37 130.78
 20 1 -1 608.1 70.84
 -20 -1 -1 828.28 72.16
 -20 1 -1 503.7 77.41
 -20 1 1 547.29 61.28
 -20 -1 1 752.7 68.63
 -20 1 -1 721.74 65.89
 20 1 1 748.68 97.67
 -20 1 1 530.43 64.77
 20 1 -1 665.9 78.87
 -20 1 -1 830.69 75.65
 20 1 1 662.03 81.52
 20 -1 1 768.95 138.03
 -20 1 1 656.72 63.17
 20 -1 1 553.26 80.1
 20 -1 -1 689.88 77.69
 -20 1 -1 823.37 76.94
 -20 -1 -1 893.7 77.06
 20 -1 1 743.9 82.54
 -20 1 1 764.5 66.7
 -20 1 -1 777.88 118.13
 20 -1 -1 636.47 80.41
 -20 -1 1 723.17 65.22
 -20 1 1 791.86 71.76
 -20 -1 1 863.16 75.41
 -20 1 1 714.79 66.07
 -20 -1 1 592.71 68.28
 -20 -1 1 736.7 67.45
 20 1 -1 999.03 117.05
 20 -1 -1 846.94 138.91
 20 1 -1 599.61 70.61
 20 1 -1 669.72 77.64
 20 -1 -1 596.4 70.12
 -20 1 -1 631.21 72.39
 20 -1 -1 456.51 87.93
 20 -1 1 643.52 78.71
 -20 1 -1 803.31 72.19
 -20 -1 -1 714.85 119.54
 20 1 1 694.59 124.6
 -20 -1 -1 879.13 81.39
 -20 -1 -1 734.02 69.73
 20 1 1 725.37 81.97
 21 -1 1 37.92 15.98
 -21 -1 1 57.56 18.57
 -21 -1 1 24.48 12.74
 -21 -1 1 48.8 21.26
 -21 1 1 54.14 18
 -21 -1 1 63.35 21.25
 -21 -1 -1 50.03 19.07
 -21 1 -1 45.33 20.89
 21 1 1 14.05 10.51
 21 -1 1 47.66 19.98
 -21 1 1 55.21 19.91
 -21 1 -1 37.15 14.41
 21 -1 -1 37.44 16.35
 -21 1 1 33.83 14.69
 -21 -1 1 63.61 19.96
 -21 -1 -1 60.34 19.56
 -21 -1 -1 55.42 17.83
 21 1 1 57.89 24.27
 21 -1 -1 31.56 14.86
 21 1 1 42 20.24
 21 1 -1 27.55 13.4
 21 1 1 26.52 9.33
 -21 1 1 31.88 12.47
 -21 1 1 47.85 18.73
 -21 -1 -1 52.5 20.55
 21 1 -1 17.74 8.44
 21 1 -1 37.03 15.82
 -21 1 1 53.11 18.33
 21 1 -1 39.83 10.76
 -21 1 -1 69.46 21.13
 -21 1 -1 40.8 19.31
 21 1 -1 48.54 22.23
 -21 1 -1 62.38 20.33
 21 -1 -1 23.12 11.91
 -22 -1 1 175.94 34.23
 -22 -1 -1 164.56 36.31
 -22 -1 -1 234.71 44.34
 -22 1 -1 205.31 38.54
 -22 -1 1 181.35 34.18
 -22 1 -1 205.35 37.8
 22 -1 -1 106.47 29.4
 22 -1 -1 128.19 33.78
 22 -1 1 166.84 41.47
 22 1 -1 111.6 30.61
 -22 1 -1 192.23 43.09
 -22 1 1 217.52 36.25
 -22 1 1 201.31 36.08
 22 1 1 133.84 36.37
 22 1 1 149.08 37.1
 22 1 1 127.83 34.63
 -22 1 1 136.65 31.73
 -22 -1 -1 176.96 37.07
 -22 -1 1 187.64 37.78
 22 -1 -1 129.74 32.82
 -22 1 1 192.21 34.7
 22 1 -1 133.75 33.32
 22 1 -1 149.43 38.83
 -22 -1 1 176.52 32.51
 -22 1 -1 137.72 37.74
 -22 -1 -1 251.39 42.26
 -22 1 -1 196.47 35.7
 22 1 1 176.49 43.03
 -22 1 1 165.1 33.81
 22 1 -1 211.12 55.02
 22 -1 1 183.14 43.08
 22 1 -1 131.46 32.88
 -22 -1 1 172.72 37.34
 -22 1 1 143.98 36.31
 -23 -1 -1 72.31 23.86
 -23 -1 1 38.26 16.74
 -23 1 -1 28.11 15.4
 23 1 1 23.83 12.99
 -23 -1 1 29.51 14.51
 23 1 -1 26.38 16.93
 -23 -1 1 26.15 12.03
 23 -1 -1 28.32 16.16
 23 -1 1 42.41 21.09
 -23 1 -1 59.73 22.38
 23 -1 1 16.03 12.12
 -23 -1 1 44.12 18.85
 -23 1 1 26.77 12.82
 -23 1 1 32.57 14.12
 23 1 -1 13.76 5.7
 23 1 1 17.89 13.91
 23 -1 -1 19.22 10.86
 -23 1 1 37.1 16.28
 23 -1 -1 27.73 14.97
 -23 -1 -1 35.17 16.34
 -23 1 1 30.83 13.88
 -23 1 -1 20.09 10.63
 23 1 -1 52.11 26.93
 23 1 -1 18.93 7.38
 -23 -1 -1 53.99 22.53
 -23 -1 -1 26.65 13.84
 -23 1 -1 53.9 22.69
 23 1 -1 27.32 16.76
 23 1 1 30.92 17.01
 -23 -1 1 18.38 6.46
 -23 1 1 38.3 17.6
 23 1 1 26.31 21.46
 23 1 1 41.01 20.75
 -24 -1 -1 43.43 15.88
 -24 -1 1 30.04 12.91
 24 -1 1 52.23 22.97
 -24 1 -1 35.4 14.44
 -24 -1 1 33.07 15.16
 24 -1 -1 46.53 21.85
 24 -1 -1 26.98 18.74
 24 1 1 9.63 3.16
 -24 1 1 34.69 9.93
 24 1 -1 30.33 10.72
 -24 1 1 71.74 22.19
 24 -1 1 27.29 17.35
 24 1 -1 4.64 6.79
 -24 -1 1 25.77 13.63
 24 1 -1 19.48 6.63
 -24 -1 -1 33.22 18.19
 -24 -1 1 45.73 19.27
 -24 1 -1 25.92 17.22
 24 1 -1 22.04 7.01
 24 1 1 29.99 15.53
 -24 1 1 26.52 12.07
 -24 1 -1 49.38 20.6
 -24 -1 -1 43.17 20.21
 24 -1 -1 22.77 8.86
 24 1 1 21.19 12.5
 -24 -1 -1 45.22 17.93
 -24 -1 1 32.67 15.05
 -24 1 1 29.24 15.12
 -24 1 1 40.6 16.41
 -24 1 -1 26.99 14.86
 24 1 1 20.97 16.14
 24 1 -1 25.63 16.65
 24 1 1 20.31 13.31
 -25 1 -1 20.63 12.31
 -25 1 1 15.93 4.98
 25 1 1 11.76 10.88
 25 -1 -1 34.82 18.55
 25 -1 1 16.81 11.65
 -25 -1 1 16.02 11.54
 -25 1 1 10.6 7.56
 25 1 1 16.1 12.01
 -25 -1 1 31.95 16.22
 -25 -1 -1 37.91 18.29
 25 1 -1 -3.75 15.02
 25 1 -1 20.39 10.88
 25 -1 1 10.84 10.01
 25 1 -1 23.16 9
 25 -1 -1 17.41 10.88
 -25 -1 1 29.12 12.54
 25 -1 1 21.98 13.47
 25 1 1 20.86 15.79
 25 1 -1 13.72 3.88
 -25 1 -1 29.24 15.27
 -25 1 -1 23.37 15.02
 25 1 1 39.34 20.36
 25 1 -1 12.03 9.27
 -25 -1 -1 28.43 14.89
 25 -1 -1 30.39 16.6
 -25 -1 1 33.35 14.89
 -25 1 1 35.7 15.38
 -25 -1 -1 26.21 15.06
 -25 1 1 29.22 14.03
 -25 1 -1 45.28 19.37
 25 1 1 22.86 12.1
 25 1 -1 9.26 10.78
 25 -1 1 29.09 18.53
 -25 -1 -1 47.67 20.94
 -25 1 1 27.08 15.11
 26 1 -1 25.73 10.85
 -26 1 1 20.75 10.44
 26 1 1 8.74 6.41
 26 1 1 50.19 22.3
 26 -1 1 25.23 12.4
 -26 -1 1 56.76 22.21
 -26 -1 1 55.74 18.16
 26 -1 1 23.6 12.74
 -26 1 -1 48.69 21.33
 26 1 -1 15.73 6.34
 -26 1 1 45.21 17.04
 -26 1 1 58.95 19.29
 26 -1 -1 21.7 12.86
 -26 -1 -1 54.57 22.65
 26 1 1 30.08 16.42
 26 1 1 8.96 14.51
 26 1 -1 52.58 21.3
 -26 1 -1 51.2 20.61
 -26 1 -1 44.44 18.82
 26 1 -1 34.5 18.07
 26 -1 -1 25.71 13.42
 -26 1 1 34.27 14.85
 -26 -1 -1 58.23 22.44
 26 -1 1 28.13 14.4
 -26 1 -1 47.89 16.41
 26 -1 1 35.29 17.93
 26 -1 -1 40.44 18.39
 26 1 1 43.89 19.27
 26 1 -1 24.69 9.07
 -26 -1 1 42.61 15.44
 -26 -1 1 44.13 18.85
 26 1 -1 34.43 16.34
 26 -1 -1 26.15 14.22
 -26 1 1 47.86 18.96
 -26 -1 -1 41.37 17.1
 -26 -1 -1 47.72 22.26
 -27 1 -1 -2.49 10.36
 27 -1 -1 10.26 8.49
 -27 -1 -1 -0.93 8.22
 -27 1 1 -10.74 8.88
 27 1 1 -10.68 14.24
 -27 1 1 4.74 10.53
 27 1 -1 0.24 6.63
 27 1 1 10.51 11.56
 -27 1 1 13.92 7.31
 27 1 1 3.86 6.31
 27 1 1 -2.13 8.01
 27 -1 1 -2.16 10.26
 27 -1 1 -8.41 16.05
 -27 -1 1 9.23 8.81
 27 1 -1 8.51 6.8
 27 1 -1 -2.86 10.16
 -27 1 -1 8.94 6.93
 27 -1 1 1.46 2.65
 -27 -1 1 -4.79 11.35
 -27 1 -1 11.26 8.43
 -27 1 1 7.3 5.3
 -27 -1 -1 12.59 14.34
 -27 -1 -1 1.61 4.42
 27 1 1 -7.04 14.32
 -27 -1 -1 15.23 11.13
 -27 1 1 15.78 5.21
 -27 1 -1 -9.56 11.16
 -27 -1 1 4.35 7.62
 27 1 -1 -0.12 5.91
 27 -1 -1 -7.68 10
 -27 -1 1 2.99 8.11
 27 -1 1 13.21 12.12
 27 1 -1 8.93 8.04
 28 1 -1 90.35 25.59
 28 -1 1 151.9 31.73
 28 -1 -1 82.57 24.02
 -28 -1 -1 243.71 45.3
 -28 -1 1 228.16 36.96
 -28 -1 -1 312.74 46.27
 28 1 1 146.81 34.34
 28 1 1 153.12 34.29
 28 -1 1 147.2 34.14
 -28 -1 -1 302.5 45.17
 -28 1 1 239.09 36.74
 28 1 1 119.06 30.04
 28 -1 1 149 30.91
 -28 -1 1 201.41 36.65
 -28 1 1 288.15 42.61
 -28 -1 1 243.29 36.12
 28 1 -1 115.92 32.16
 -28 1 1 207.88 37
 28 1 -1 162.59 34.64
 28 -1 -1 151.54 33.65
 28 -1 1 132.18 31.9
 -28 -1 -1 235.27 41.45
 28 1 1 99.05 25.11
 -28 -1 1 174.58 32.34
 -28 1 -1 213.62 36.53
 -28 1 1 203.45 35.56
 28 1 -1 135.08 28.97
 -28 1 -1 216.21 40.2
 -28 1 -1 252.68 43.36
 28 1 1 147.84 34.8
 -28 1 -1 220.79 38.83
 -28 1 -1 251.58 42.42
 28 -1 -1 128.21 32.68
 -29 -1 -1 5.79 8.51
 -29 -1 -1 9.77 7.2
 29 1 1 1.01 7.76
 -29 -1 -1 3.67 2.58
 29 1 1 3.71 2.13
 29 1 1 11.29 8.74
 -29 1 -1 12.51 10.1
 -29 -1 1 -9.31 11.2
 29 -1 1 -5.69 13.23
 29 -1 -1 -4.44 10.43
 29 -1 -1 -3.32 7.83
 -29 1 -1 4.53 4.51
 -29 1 -1 7.42 8.23
 -29 1 1 11.34 8.77
 29 -1 1 1.16 5.69
 -29 -1 -1 0.05 6.54
 -29 -1 1 10.8 6.45
 -29 -1 1 12.37 9.17
 29 -1 1 3.46 5.06
 29 1 1 -17.94 10.91
 -29 1 1 12.34 6.59
 -29 -1 1 4.21 5.91
 -29 1 1 4.02 2.93
 29 1 1 21.29 12.95
 29 1 -1 5.29 7.22
 -29 1 -1 10.8 10.51
 29 1 -1 2.8 2.78
 29 -1 -1 3.54 4.04
 29 1 -1 12.58 9.09
 29 -1 1 -4.39 10.76
 29 1 -1 1.42 6.04
 -30 -1 1 124.79 24.36
 -30 1 1 132.98 24.26
 -30 -1 1 138.1 28.04
 30 1 -1 90.89 23.96
 30 -1 1 64.55 17.79
 30 1 1 91.77 24.43
 30 -1 1 64.67 17.23
 -30 1 -1 157.51 29.17
 30 -1 -1 76.33 21.96
 30 1 1 76.31 20.19
 -30 1 -1 149.22 28
 -30 1 1 142.15 26.57
 -30 -1 1 125.13 24.11
 30 -1 1 77.66 20.32
 -30 1 -1 151.16 29.38
 30 1 -1 51.94 15.88
 30 -1 -1 84.29 23.2
 -30 1 -1 153.87 29.32
 30 -1 -1 57.78 19.16
 30 -1 1 72.6 19.91
 -30 -1 -1 182.5 32.69
 30 1 1 38.46 11.23
 30 1 1 56.46 16.78
 30 1 -1 95.91 22.43
 -30 1 1 153.88 28.55
 -30 -1 -1 185.21 33.12
 -30 -1 -1 172.49 30.44
 31 1 1 -9.06 7.74
 31 -1 -1 -11.2 8.91
 31 -1 1 6.83 3.38
 -31 1 -1 3.32 7.27
 -31 1 1 0.47 4.04
 -31 -1 -1 3.5 6.65
 31 -1 -1 3.6 2.59
 -31 -1 -1 -11.3 6.79
 -31 1 -1 -6.4 5.72
 -31 -1 1 0.11 5.36
 -31 1 -1 -3.25 3.89
 31 -1 -1 4.27 5.96
 31 1 -1 -14.58 8.61
 31 1 -1 3.47 4.56
 -31 -1 -1 2.16 4.07
 31 1 1 1.64 4.45
 31 -1 1 -1.93 2.24
 -31 -1 1 -0.34 4.05
 31 -1 1 -11.01 9.03
 -31 1 1 -5.08 5.39
 -31 1 -1 -0.16 4.58
 31 1 1 7.71 6.98
 -31 -1 -1 -5.96 9.45
 32 1 1 52.18 14.29
 -32 -1 1 141.5 23.41
 32 -1 -1 61.95 14.52
 32 -1 1 89.78 19.51
 -32 -1 1 125.24 22.75
 -32 1 -1 155.14 25.49
 -32 1 1 122.46 22.46
 32 1 1 59.83 15.28
 32 1 -1 68.4 17.38
 32 -1 -1 57.03 13.05
 -32 -1 -1 152.65 25.42
 -32 1 1 148.17 24.32
 -32 -1 -1 127.64 24.84
 0 -2 1 0.46 0.8
 0 2 1 6.6 6.04
 0 2 1 1.63 2.82
 0 2 -1 -4.48 5.37
 0 2 1 -0.92 1.41
 0 2 -1 1 2.37
 0 -2 -1 1.68 1.14
 0 2 1 2.22 3.67
 0 2 1 -2.95 3.95
 0 2 -1 4.35 3.02
 0 2 -1 -0.54 1.29
 0 -2 1 0.75 1.19
 1 2 1 77.4 17.02
 -1 2 -1 83.84 16.78
 1 2 1 96.84 19.29
 1 2 -1 95.61 18.66
 -1 2 1 83.28 12.99
 1 2 1 85.61 18.6
 1 2 1 89.7 9.63
 1 2 -1 75.72 17.09
 -1 2 1 88.8 10.69
 -1 2 -1 97.09 20.39
 -1 2 1 83.41 18.83
 -1 -2 -1 81.32 11.41
 -1 2 -1 86.64 9.24
 -1 -2 -1 81.05 17.13
 -1 -2 1 88.76 17.75
 -1 -2 -1 89.2 17.88
 -1 2 1 95.85 20.58
 -1 2 1 95.02 11.09
 -1 2 -1 80.66 20.37
 1 -2 1 76.16 14.88
 1 2 -1 80.98 16.16
 1 2 1 83.91 16.32
 -1 2 -1 75.62 18.26
 -1 2 1 75.04 15.79
 1 -2 -1 83.31 15.79
 -1 -2 1 83.25 10.72
 2 2 1 11.24 8.25
 -2 2 1 6.41 4.21
 2 -2 1 8.33 6.09
 2 2 -1 11.51 5.26
 2 2 1 7.99 4.97
 -2 -2 -1 5.21 3.74
 -2 2 -1 5.14 5.54
 2 2 1 7.82 5.61
 -2 2 1 11.8 8.04
 -2 2 -1 4.8 5.2
 -2 2 -1 2.96 3.09
 -2 -2 1 8.55 4.17
 2 2 1 7.05 3.37
 -2 2 -1 7.06 6.22
 -2 2 1 11.17 4.14
 2 -2 1 1.67 3.8
 2 2 -1 9.46 6.62
 2 -2 -1 11.31 5.6
 2 -2 1 27.24 8.32
 -2 -2 -1 3.09 3.63
 -2 2 1 8.52 3.43
 -2 2 1 8.46 3.91
 -2 -2 1 3.43 3.85
 -2 2 1 17.67 8.08
 3 -2 1 481.93 43.69
 3 -2 -1 610.11 55.17
 3 2 1 483.87 47.45
 -3 2 1 559.18 38.11
 -3 -2 -1 713.23 33.56
 -3 2 1 554.49 22.61
 -3 -2 1 679.18 39.12
 3 -2 -1 566.66 36.4
 -3 2 1 497.5 44.8
 3 2 1 526.98 35.78
 3 2 -1 587.26 42.94
 3 2 -1 686.27 47.49
 3 2 -1 591.26 45.51
 3 -2 1 528.64 47.9
 -3 -2 -1 297.01 30.49
 -3 2 -1 737.85 64.32
 3 2 1 594.34 47.8
 -3 -2 -1 535.31 44.05
 3 2 1 603.87 46.76
 -3 2 -1 584.93 50.42
 3 -2 1 447.59 31.06
 4 2 1 7362.94 154.21
 4 -2 -1 7829.16 164.39
 4 -2 1 7189.92 181.07
 -4 -2 -1 7847.76 171.84
 4 -2 -1 7056.63 197.25
 4 2 -1 9273.05 173.37
 4 2 1 9079.42 180.32
 4 2 1 8569.53 189.13
 -4 2 1 7297.12 174.22
 -4 2 -1 9999 244.55
 -4 2 1 7933.36 159.79
 -4 2 -1 9444.71 215.43
 -4 -2 -1 9346.4 151.22
 -4 -2 1 9383.51 163.56
 4 2 -1 8644.07 182.58
 4 -2 1 6794.49 166.42
 4 -2 1 5685.82 98.68
 5 2 1 1234.79 67.29
 5 2 1 890 73.5
 -5 2 1 1041.87 57.98
 5 2 1 1006.34 65.45
 5 -2 -1 1053.7 69.55
 5 2 1 1057.64 67.58
 5 -2 -1 872.76 81.42
 -5 -2 -1 909.73 66.55
 5 -2 1 922.77 62.67
 -5 -2 -1 941.36 61.54
 5 -2 1 1006.66 69.8
 -5 2 -1 1224.3 89.71
 -5 2 -1 1070.09 76.1
 5 -2 1 569.21 26.39
 -5 2 1 955.51 67.49
 -5 2 1 1004.02 66.31
 -5 -2 1 1181.12 63.62
 -5 -2 -1 1301.67 64.83
 -5 -2 1 957.04 65.69
 -6 -2 -1 3638.93 150.63
 -6 2 1 3873.09 136.7
 6 -2 -1 3367.58 159.98
 -6 -2 -1 4317.96 132.31
 -6 2 1 3785.02 152.03
 6 2 -1 3567 53.83
 6 2 1 3648.05 159.54
 -6 -2 1 4085.23 141.39
 -6 2 -1 3449.6 147.7
 -6 2 1 4093.91 120.36
 6 2 1 3832.52 98.21
 6 -2 1 3716.56 158.96
 -6 2 -1 3803.87 163.52
 -6 -2 -1 3979.41 130.84
 -6 -2 1 4167.46 128.62
 -6 -2 -1 3889.2 140.92
 6 2 1 4930.88 136.35
 6 -2 1 3764.6 140.05
 -6 2 -1 3111.63 155.06
 6 2 1 3764.93 133.84
 -6 2 1 4114.03 137.99
 6 -2 -1 3514.64 140.07
 6 -2 1 3660.08 127.64
 6 2 -1 4242.44 151.12
 7 -2 1 294.32 40.88
 -7 -2 -1 315.6 42.66
 7 2 1 288.67 30.12
 7 -2 -1 344.84 48.04
 -7 2 1 293.32 44.48
 7 2 1 333.66 41.84
 -7 2 1 340.56 36.15
 -7 2 -1 238.99 41.72
 7 2 -1 370.05 46.8
 -7 -2 1 353.75 39.53
 7 2 -1 339.61 22.26
 7 2 1 381.69 38.59
 7 2 1 303.43 42.33
 -7 2 1 341.97 42.95
 7 -2 1 286.87 47.77
 -7 -2 -1 376.47 42.76
 7 2 1 299.88 48.62
 7 2 -1 400.32 43.81
 -7 -2 1 324.69 41.2
 -7 2 -1 286.68 46.09
 -7 -2 -1 296 45.97
 -7 2 1 288.61 38.67
 7 -2 1 330.85 39.58
 -7 -2 -1 293.03 37.93
 7 -2 -1 236.37 45.56
 8 2 -1 1291.51 93.07
 -8 -2 -1 990.34 78.96
 -8 2 1 994.08 81.8
 -8 2 1 1178.18 71.35
 -8 -2 1 1214.42 79.91
 8 2 -1 1487.27 88.91
 -8 -2 -1 1137.63 93.47
 -8 -2 -1 1195.82 79.04
 -8 2 -1 868.03 81.69
 8 -2 1 1112.57 83.73
 8 2 1 1183.95 89.9
 8 2 1 1075.3 63.95
 8 -2 1 957.03 92.13
 8 2 1 1271.47 72.31
 -8 2 -1 925.63 86.62
 8 2 1 1031.46 79.13
 8 -2 -1 1088.96 104.81
 -8 -2 1 1169.13 81.04
 -8 -2 -1 1326.36 86.34
 -8 2 1 1328.49 85.07
 -8 2 1 1046.48 88.4
 8 -2 -1 1266.4 103.16
 8 -2 1 1267.68 79.44
 9 -2 1 0.2 6.41
 9 2 -1 -1.05 3.12
 9 -2 1 -1.51 10.82
 -9 2 -1 4.01 5.16
 -9 -2 -1 -3.27 3.41
 -9 -2 -1 -2.74 9.6
 -9 -2 1 -0.02 2.67
 -9 -2 -1 -6.38 9.82
 -9 2 1 -0.9 5.27
 9 2 1 -3.98 5.52
 -9 2 1 7.91 6.63
 -9 2 1 9.12 10.52
 -9 -2 1 -0.78 2.5
 9 2 -1 -6.26 9.58
 9 -2 1 7.91 6.76
 9 -2 -1 9.03 14.04
 -9 2 -1 -12.61 10.53
 -9 2 1 -2.31 4.15
 9 -2 -1 1.51 5.65
 9 2 1 -3.24 5.08
 9 2 1 -4.45 6.04
 9 2 1 -0.54 4.55
 10 -2 -1 150.98 43.72
 10 2 1 176.69 39.53
 10 2 -1 217.29 37.95
 -10 -2 -1 151.94 43.58
 10 -2 -1 164.34 41.67
 -10 2 1 162.44 36.81
 -10 2 1 163.32 37.55
 10 -2 1 179.72 37.97
 10 2 -1 198.12 41.56
 -10 2 -1 157.64 38.11
 10 -2 1 192.32 32.27
 -10 2 1 204.04 32.47
 10 -2 1 132.81 35.82
 -10 -2 1 188.53 35.23
 -10 -2 1 195.46 36.48
 -10 2 1 180.12 33.07
 -10 -2 -1 162.93 37.42
 10 2 1 138.38 34.36
 -10 2 -1 160.12 37.43
 -10 -2 -1 169.88 36.13
 -11 -2 -1 46.13 25.08
 11 2 -1 50.12 21.12
 -11 2 -1 32.46 17.64
 -11 -2 1 67.31 21.83
 11 2 -1 75.7 23.68
 -11 2 1 42.8 19.86
 -11 -2 -1 38.3 20.74
 11 -2 1 52.08 20.68
 -11 2 1 60.06 18.46
 11 2 1 59.15 22.56
 11 -2 1 36.55 14.29
 11 -2 -1 65.13 29.16
 -11 -2 -1 32.25 16.32
 -11 2 -1 39.04 19.63
 11 2 1 26.59 13.88
 -11 -2 -1 29.09 11.37
 11 -2 1 72.61 21.51
 11 -2 1 30.06 17.72
 11 2 1 23.03 13.6
 -11 2 1 40.45 20.27
 11 -2 -1 43.61 22.67
 -11 -2 1 56.26 19.7
 -12 -2 -1 207.97 50.26
 -12 -2 -1 193.7 43.2
 12 -2 -1 154.76 48.8
 -12 2 -1 136.56 37.77
 -12 -2 1 200.74 39.33
 -12 2 -1 137.56 37.66
 12 2 -1 187.23 44.67
 12 -2 1 127.08 39.83
 12 2 -1 189.53 38.68
 12 -2 1 223.83 48.7
 -12 -2 -1 178.16 42.11
 -12 2 1 149.15 38.5
 12 2 1 141.65 37.3
 12 2 1 183.74 44.63
 12 -2 1 171.92 47.47
 12 -2 -1 185.16 53.36
 -12 -2 1 177.29 36.4
 -12 2 1 150.31 39
 -13 -2 -1 27.72 13.69
 13 -2 1 44.02 27.8
 -13 2 1 19.92 10.57
 -13 -2 -1 56.56 23.8
 13 2 1 27.93 17.1
 13 -2 -1 24.15 21.48
 13 -2 1 54.7 24.68
 13 2 1 22.18 8.95
 -13 -2 -1 38.09 20.87
 -13 -2 1 42.49 18.21
 -13 2 -1 26.63 17.28
 13 2 -1 30.72 16.05
 -13 2 -1 26.21 17.58
 -13 2 1 23.6 12.45
 13 -2 1 18.23 12.45
 13 -2 -1 38.29 24.32
 -13 -2 1 28.44 16.58
 13 2 -1 40.97 21.72
 -13 -2 1 55.45 25.41
 -14 -2 1 637.67 81.75
 14 -2 -1 395.66 81.61
 -14 -2 -1 682.11 89.04
 14 2 1 650.59 95.04
 14 2 -1 721.23 95.09
 -14 2 -1 393.37 69.72
 14 -2 -1 541.26 100.32
 -14 -2 1 673.34 92.72
 -14 2 1 470.76 74.38
 -14 -2 1 753.5 82.84
 14 -2 1 620.51 91.38
 14 -2 1 385.89 81.05
 14 2 -1 682.65 83.94
 -14 2 -1 548.22 82.13
 -14 -2 -1 663.6 88.23
 14 2 1 602.13 78.16
 14 -2 1 571.52 94.75
 -15 2 -1 54.8 25.11
 -15 2 -1 19.41 15.51
 -15 -2 -1 57.56 26.91
 15 2 -1 23.87 7.42
 15 2 1 42.47 24.67
 15 2 1 47.32 24.83
 15 -2 -1 32.26 26.45
 -15 2 1 31.92 16.14
 -15 -2 1 44.96 24.81
 -15 -2 1 41 21.82
 15 -2 -1 23.47 20.6
 15 -2 1 28.25 20.58
 -15 -2 -1 32.73 23.75
 15 -2 1 57.71 27.08
 15 2 -1 22.2 15.55
 -15 -2 1 55.75 26.71
 -16 2 -1 783.31 106.89
 -16 2 1 912.63 115.13
 -16 -2 -1 1231.43 126.17
 16 2 -1 889.92 102.85
 -16 -2 1 1119.66 129.73
 -16 -2 1 1201.24 113.18
 16 -2 -1 831.17 125.87
 -16 -2 -1 859.34 111.58
 16 2 1 1110.37 122.46
 -16 -2 1 1078.86 116.29
 16 -2 -1 991.2 137.73
 16 -2 1 848.37 125.66
 16 -2 1 953.58 134.14
 16 2 1 928.83 123.46
 -16 2 -1 980.81 118.31
 16 2 -1 1192.73 134.6
 -17 2 -1 101.96 39.68
 -17 2 -1 52.92 28.2
 17 2 1 65.35 26.6
 -17 2 1 70.1 29.18
 17 -2 -1 68.15 38.87
 17 2 -1 106.75 43.09
 17 -2 -1 83.89 44.15
 17 -2 1 88.55 38.34
 17 2 1 91.85 33.76
 -17 -2 1 105.27 41.83
 -17 -2 -1 74.31 35.02
 -17 -2 -1 172.03 51.34
 17 -2 1 49.13 31.32
 18 -2 -1 290.46 77.75
 18 2 -1 206.43 40.67
 -18 2 -1 237.43 65.65
 -18 -2 1 229.51 35.56
 18 -2 -1 169 50.35
 -18 2 1 212.19 33.65
 -18 2 -1 254.47 39.6
 18 2 -1 209.05 38.38
 18 2 1 265.1 68.17
 -18 2 1 133.11 31.37
 -18 -2 1 254.4 38.79
 -18 -2 -1 302.37 41.72
 -18 -2 -1 389.22 77.88
 -18 -2 1 263.5 36.91
 -18 -2 1 309.48 73.11
 -18 2 -1 255.61 63.51
 -18 2 -1 213.44 39.09
 -18 -2 1 251.92 35.79
 18 2 1 244.03 48.86
 -18 -2 -1 254.06 66.81
 -18 -2 -1 224.32 36.84
 18 2 1 226.76 40.93
 -18 2 1 230.36 58.8
 18 2 -1 319.09 77.43
 18 2 1 242.54 43.77
 18 -2 1 186.08 60.05
 18 -2 1 89.7 37.71
 18 2 1 250.89 60.16
 -18 2 1 239.23 36.47
 -18 2 -1 185.19 38.48
 19 -2 -1 6.71 16.85
 -19 2 -1 7.83 8.78
 -19 2 -1 14.53 12.11
 19 2 1 20.15 21.81
 -19 -2 -1 -2.38 10.81
 -19 -2 -1 5.56 6.4
 -19 -2 -1 2.98 3.38
 19 2 1 -7.37 8.94
 -19 2 -1 7.9 8.97
 19 2 -1 -3.2 7.72
 19 2 -1 -4.98 21.34
 -19 2 1 1.85 4.98
 -19 -2 1 2.86 1.85
 -19 2 -1 -2.47 5.54
 -19 -2 -1 13.92 11.33
 -19 2 1 2.79 3.36
 -19 -2 1 5.21 7.84
 -19 2 1 -4.19 6.47
 19 -2 1 77.61 41.74
 19 2 -1 -5.02 6.36
 19 2 -1 18.15 21.66
 -19 -2 1 -6.4 5.81
 19 2 -1 -3.96 7.5
 -19 -2 -1 13.59 16.11
 19 2 1 -8.02 7.91
 19 2 1 0.69 5.12
 -19 2 -1 -0.47 5.95
 -19 -2 -1 -2.15 6.74
 19 -2 1 4.18 6.71
 -19 2 -1 11.08 4.59
 -19 2 1 -2.88 8.74
 -19 2 1 -6.36 10.19
 -19 2 -1 -6.91 12.41
 -19 -2 1 2.87 6.73
 19 2 1 18.32 18.46
 19 2 1 4.06 14.09
 19 -2 -1 4.22 10.73
 -19 2 1 6.55 5.93
 19 -2 -1 29.54 25.97
 19 2 -1 -4.64 10.81
 -19 -2 1 21.38 23.75
 19 2 1 -0.94 5.63
 -19 -2 -1 41.77 27.75
 19 2 -1 3.87 6.48
 -19 2 1 0.19 4.89
 19 -2 1 11.29 3.81
 19 2 1 22.52 18.84
 -19 2 -1 31.08 25.32
 20 2 1 88.01 45.08
 -20 2 1 50.03 17.55
 20 2 -1 38.26 16.22
 20 2 -1 39.61 18.25
 20 2 1 32.18 11.7
 -20 2 1 54.29 18.2
 20 -2 -1 81.71 43.92
 -20 -2 -1 63.17 19.98
 20 2 1 56.83 23.52
 20 -2 -1 41.13 17.7
 -20 -2 -1 65.07 22.57
 20 -2 1 0.06 17.87
 -20 2 -1 48.11 20.91
 -20 2 1 21.07 10.01
 20 2 -1 28.63 12.18
 -20 2 1 39.41 13.47
 20 -2 -1 69.33 34.63
 -20 -2 -1 66.07 21.33
 20 2 -1 79.07 31.87
 -20 2 -1 58.62 20.6
 -20 2 -1 106.79 44.93
 -20 -2 -1 67.8 25.29
 20 2 1 52.86 26.21
 20 -2 1 44.76 16.54
 -20 2 -1 57.39 22.33
 -20 2 -1 54.98 17.93
 20 2 1 57.65 21.15
 -20 -2 1 61.61 20.65
 20 -2 1 52.72 22.14
 20 -2 -1 52.11 24.2
 -20 -2 1 68.56 19.16
 -20 -2 1 50.79 16.96
 20 2 -1 54 21.86
 -20 2 -1 40.09 14.99
 20 2 1 46.5 20.93
 -20 2 1 64.69 19.19
 -20 -2 1 58.94 21.14
 -20 2 -1 62.67 20.08
 -20 2 1 29.93 10.78
 21 2 -1 105.44 28.7
 21 2 1 95.56 33.36
 21 2 1 92.61 25.39
 21 2 1 96.22 30.13
 21 2 1 72.19 25.27
 21 -2 -1 54.78 23.49
 -21 -2 -1 126.62 29.96
 -21 2 1 90.76 24.67
 -21 2 1 106.39 27.69
 21 2 1 118.26 31.61
 -21 2 1 102.79 24.49
 -21 2 -1 113.97 30.8
 21 -2 -1 75.81 26.67
 21 -2 1 63.4 21.11
 21 2 -1 64.84 24.55
 -21 2 -1 87.95 30.08
 -21 -2 1 119.57 27.35
 -21 -2 -1 135.22 33.21
 -21 2 -1 119.22 27.83
 21 -2 1 80.81 26.14
 21 2 1 95.29 31.15
 -21 -2 1 124.3 27.68
 -21 2 1 75.03 22.7
 -21 -2 1 108.98 27.6
 -21 2 1 131.04 30.09
 -21 2 -1 91.68 27.01
 21 2 -1 122.11 42.55
 -21 2 -1 108.03 30.22
 -21 -2 -1 141.87 32.15
 -21 -2 -1 118.07 31.11
 -21 2 -1 119.81 32.62
 21 2 -1 78.36 22.83
 21 2 -1 49.59 17.4
 -21 2 1 109.15 26.25
 -21 -2 1 144.16 31.95
 22 2 1 23.98 12.41
 -22 2 -1 27.78 15.09
 22 -2 1 20.01 15.03
 -22 -2 -1 52.44 20.03
 22 2 1 27.95 11.63
 -22 2 1 9.96 4.02
 -22 -2 1 45.2 20.23
 -22 2 -1 49.61 18.92
 -22 2 -1 29.58 18.6
 22 2 -1 17.82 6.59
 22 2 -1 49.38 27.1
 22 2 -1 26.18 15.55
 -22 -2 1 35.91 16.65
 22 2 -1 24.73 14.89
 22 2 -1 22.06 16.57
 -22 2 1 35.76 14.2
 -22 2 1 31.6 12.94
 -22 -2 -1 17.84 10.38
 -22 2 -1 31.87 16.78
 22 -2 -1 14.79 13.65
 22 2 1 8.8 7.28
 22 2 1 21.48 9.13
 -22 -2 -1 40.1 17.86
 22 2 1 20.3 4.8
 -22 2 1 26.8 12.31
 -22 -2 1 28.46 13.17
 -22 2 -1 38.1 19.62
 22 -2 -1 12.83 10.02
 -22 -2 1 19.85 11.3
 22 -2 1 33.58 16.84
 22 2 1 36.03 18.1
 -22 2 1 36.23 16.89
 -22 -2 -1 19.22 10.5
 -23 -2 1 39.3 17.56
 23 2 -1 35.27 19.39
 23 -2 -1 12.23 10.56
 -23 2 -1 33.82 13.61
 23 2 -1 28.84 16.48
 -23 -2 1 33.07 14.28
 -23 2 -1 40.7 16.96
 -23 2 1 38.92 15.78
 23 2 -1 28.16 13.21
 23 -2 1 31.61 16.33
 23 2 -1 28.53 17.27
 23 2 1 23.69 13.99
 -23 -2 1 68.61 22.12
 -23 -2 -1 49.51 21.03
 23 2 1 39.88 18.02
 -23 -2 -1 61.93 23.76
 -23 -2 1 41.67 17.42
 -23 2 1 45.63 17.43
 23 -2 -1 16.29 12.86
 -23 2 -1 49.21 20.82
 -23 2 1 43.96 17.72
 -23 2 1 42.33 16.94
 23 2 1 39.56 20.5
 23 2 -1 38.81 17.18
 -23 -2 -1 56.83 22.33
 -23 -2 -1 48.49 19.59
 23 -2 1 30.16 16.3
 23 2 1 27.67 16.64
 23 2 -1 18.57 13.73
 23 2 1 42.42 19.56
 -23 2 1 35.49 15.76
 -23 2 1 57.08 20.13
 -23 2 -1 48.51 19.97
 -24 2 -1 -7.05 9.22
 24 2 -1 11.71 13.33
 24 -2 -1 19.57 15.38
 -24 2 -1 0.02 10.48
 -24 -2 1 -6.4 11.23
 -24 2 1 7.62 8.63
 24 2 1 12.02 11.82
 24 2 1 1.44 3.8
 24 -2 1 -4.72 13.14
 -24 -2 1 1.32 5.37
 24 2 -1 8.37 9.23
 24 -2 -1 -0.41 7.55
 -24 2 -1 -8.84 10.22
 -24 2 1 -0.86 7.16
 -24 2 1 -4.49 8.65
 -24 -2 -1 1.95 4.26
 -24 -2 -1 -4.91 8.91
 24 2 1 -0.21 9.25
 -24 2 1 -6 10.11
 -24 2 1 5.58 10.29
 24 2 -1 9.37 14.48
 24 2 -1 9.48 12
 -24 2 -1 8.01 10.53
 -24 -2 -1 -0.33 7.16
 -24 -2 -1 -3.25 3.88
 24 2 1 1.25 7.67
 24 -2 1 16.68 13.73
 24 2 -1 4.3 5.9
 24 2 -1 2.11 4.92
 24 2 1 -5.63 11.27
 -24 -2 1 -6.37 6.15
 -24 2 1 6.49 2.87
 -24 -2 1 8.57 10.14
 -25 -2 -1 -3.76 9.82
 25 2 -1 8.26 6.78
 -25 2 1 5.64 4.11
 -25 2 -1 13.19 12.48
 25 -2 1 10.62 6.59
 -25 -2 -1 -5.34 9.09
 -25 -2 1 -0.43 6.49
 25 2 -1 5.37 4.95
 -25 -2 1 5.85 2.91
 25 -2 -1 -4.29 6.68
 25 2 -1 -11.39 13.04
 25 -2 1 -9.25 11.58
 -25 -2 1 4.18 5.01
 -25 -2 -1 18.14 11.93
 -25 2 -1 13.53 12.13
 25 2 1 -13.45 16.67
 25 2 1 17.81 14.13
 25 2 1 2.7 8.08
 -25 -2 1 -1.23 6.83
 25 2 -1 6.56 7.34
 25 -2 -1 11.63 12.24
 -25 2 -1 -4.95 10.58
 -25 2 1 -11.78 10.67
 -25 2 1 4.73 6.87
 -25 2 1 7 5.41
 25 2 1 9.02 11.59
 -25 2 1 -13.03 13.52
 25 2 -1 -0.86 4.56
 -25 2 -1 10.09 4.8
 -25 -2 -1 -0.32 8.04
 25 2 1 -3.28 10.53
 25 2 -1 3.23 9.19
 26 -2 1 11.12 11.14
 -26 -2 1 5.48 2.98
 26 -2 1 2.18 7.28
 -26 -2 -1 9.42 8.42
 26 2 1 9.83 8.86
 -26 -2 1 24.59 14.29
 -26 -2 -1 9.36 8.57
 -26 -2 1 5.25 8.08
 26 -2 1 -10.64 16.07
 26 -2 1 -16 15.59
 26 2 -1 1.78 18.09
 -26 2 1 10.76 8.52
 -26 2 -1 4.77 7.83
 26 2 -1 6.03 3.65
 -26 2 1 9.81 9.62
 26 -2 -1 0.41 3.06
 26 2 -1 -7.66 10.82
 26 2 -1 19.93 14.59
 -26 2 -1 8.28 9.22
 -26 2 1 -3.62 6.76
 26 2 -1 0.97 8.99
 26 2 1 -5.73 9.92
 26 2 -1 1.55 9.02
 -26 -2 -1 5.31 3.16
 -26 -2 1 8.2 9.39
 -26 2 -1 6.26 7.06
 26 -2 -1 11.44 13.29
 26 2 1 8.54 10.42
 -26 2 -1 1.99 6.39
 26 2 1 10.12 6.27
 -26 2 1 -2.23 8.64
 26 2 1 2.52 3.8
 -26 -2 -1 10.99 10.37
 -26 2 -1 19.36 13.73
 -26 2 1 8.61 5.51
 27 2 1 -6.06 10.65
 27 -2 -1 3.32 5.87
 -27 2 -1 -5.48 5.24
 27 2 -1 -0.3 2.64
 -27 2 -1 1.62 2.65
 27 2 1 -6.95 10.21
 27 2 -1 -7.2 5.82
 -27 -2 1 1.39 8.74
 27 -2 1 -3.19 10.16
 27 -2 -1 -14.98 11.91
 27 -2 1 -3.77 5.75
 -27 2 1 -5.64 9.41
 -27 -2 1 7.88 6.37
 27 2 -1 2.1 9.19
 27 2 1 8.83 7.72
 -27 -2 -1 16.35 13.86
 -27 2 -1 -3.26 7.26
 -27 2 1 -4.28 10.51
 27 2 1 0.64 7.85
 -27 2 1 5.33 4.5
 -27 2 -1 -8.36 11.47
 27 -2 1 18.9 13.89
 27 -2 -1 -9.73 11.12
 27 2 -1 -15.37 13.17
 27 -2 1 5.76 7.93
 27 2 1 12.99 12.64
 -27 -2 -1 23.85 17.1
 -27 2 1 1.45 8.55
 27 2 -1 -4.95 8.65
 -27 -2 1 -4.05 8.33
 -27 2 -1 2.12 7.6
 -27 -2 1 2.28 5.57
 -27 -2 -1 11.81 8.73
 -27 -2 -1 3.51 5.18
 28 2 1 6.24 9.47
 -28 2 -1 28.63 11.52
 -28 2 -1 25.4 13.67
 -28 -2 1 31.3 12.47
 28 -2 1 15.63 10.29
 28 2 -1 21.1 11.93
 28 2 1 -1.69 7.16
 28 -2 1 7.19 2.87
 -28 -2 1 -0.69 6.14
 -28 -2 -1 19.95 12.34
 28 2 -1 22.76 12.83
 -28 2 -1 16.78 9.06
 28 2 -1 -13.73 16.09
 -28 -2 -1 22.78 13.99
 28 2 1 12.24 11.83
 28 2 -1 13.72 11.2
 -28 -2 1 19.81 10.18
 -28 2 1 16.04 10.17
 28 -2 -1 18.86 13.8
 28 -2 -1 17.45 11.26
 -28 -2 -1 20.1 13.39
 28 -2 -1 5.89 6.69
 -28 2 1 30.74 15.95
 -28 2 1 20.09 10.4
 -28 -2 -1 30.96 15.91
 28 2 -1 14.32 12.67
 -28 -2 1 23.52 10.57
 -28 2 -1 47.04 19.69
 28 -2 -1 -4.22 9.49
 28 2 1 9.73 6.93
 28 -2 1 15.19 11.14
 -29 -2 -1 20 11.38
 -29 2 -1 2.77 5.79
 29 2 1 -8.13 2.72
 -29 2 1 6.94 8.41
 29 -2 -1 -2.58 2.45
 29 2 1 -9.03 11.63
 29 2 1 -9.84 8.5
 -29 -2 -1 1.74 5.73
 29 2 -1 -5.3 10.06
 29 2 -1 -6.39 6.71
 -29 2 1 -2.39 8.2
 29 -2 1 2.92 5.58
 -29 -2 -1 -1.16 3.82
 -29 -2 -1 6.92 6.09
 29 2 -1 3.53 6.39
 29 -2 1 5.95 6.51
 -29 2 -1 2.07 4.77
 -29 2 -1 0.56 9.17
 -29 -2 1 -1.42 4.39
 29 -2 -1 5.65 3.99
 -29 2 1 1.03 7.89
 29 2 1 1.7 4.51
 29 -2 1 1.46 3.12
 29 -2 -1 0.15 5.27
 -29 -2 1 2.45 8.9
 29 2 -1 6.47 13.68
 -29 2 -1 -0.35 4.83
 29 2 -1 4.09 3.22
 -29 -2 1 3.28 6.96
 30 2 1 13.71 8.53
 30 2 1 13.45 6.77
 -30 2 -1 37.33 14.42
 30 2 -1 21.72 11.14
 -30 -2 -1 34.28 17.71
 -30 -2 1 34.86 14.3
 30 -2 1 17.55 9.65
 30 2 -1 26.04 12.66
 -30 2 1 27.22 11.27
 30 -2 1 0.15 6.72
 -30 -2 -1 17.15 7.91
 30 2 -1 18.66 13.02
 -30 -2 -1 31.94 10.76
 30 -2 -1 23.43 10.23
 30 -2 -1 -1.84 4.3
 -30 -2 1 22.82 10.16
 -30 -2 1 19.1 9.23
 30 -2 1 5.22 2.22
 30 2 1 16.45 11.09
 -30 2 -1 19.73 5.67
 -30 2 1 39.07 14.89
 -30 -2 -1 11.83 4.56
 30 2 1 14.81 11.09
 30 -2 -1 0.57 3.3
 -30 2 -1 38.14 15.95
 -30 2 -1 20.11 8.39
 -30 2 1 33.39 11.49
 31 2 -1 14.04 8.34
 -31 2 -1 -6.43 7.94
 -31 -2 -1 -4.78 6.51
 -31 2 1 8.14 7.37
 31 2 1 -0.14 8.08
 -31 -2 1 8.37 6.75
 31 2 1 9.81 7.63
 31 2 1 7.15 4.94
 31 -2 -1 -10.89 9.46
 -31 2 -1 -4.52 6.29
 -31 2 1 2.35 5.43
 31 -2 -1 -4.23 5.58
 -31 -2 -1 -5.2 7.96
 31 2 1 -10.53 7.56
 31 2 -1 9.35 8.16
 31 -2 -1 -1.96 7.3
 31 -2 1 20.32 10.84
 -31 2 -1 10.3 7.07
 -31 -2 -1 15.68 9.5
 31 -2 1 7.86 7.93
 -31 -2 -1 7.37 6.55
 31 -2 1 8.67 6.69
 31 2 -1 6.47 7.24
 -31 2 -1 15.53 9.07
 -31 -2 1 -6.98 7.42
 -31 -2 1 2.12 2.24
 32 -2 -1 12.49 5.07
 32 -2 1 17.54 7.35
 32 2 -1 4.14 2.3
 0 3 -1 5.36 2.03
 0 3 1 4.41 3.22
 0 3 -1 -2.92 6.01
 0 -3 1 0.31 2.98
 0 3 -1 -0.26 4.06
 0 -3 1 4.34 4.5
 0 3 1 -1.89 5.51
 0 -3 -1 1.73 3.8
 0 -3 -1 -3.81 3.65
 0 3 1 -3.66 8.57
 0 3 1 -4.2 4.86
 0 -3 -1 5.58 7.26
 -1 3 1 11.45 5.6
 1 3 -1 3.92 2.42
 -1 3 1 11.86 4.93
 -1 3 -1 7.88 4.06
 1 3 -1 10.5 5.84
 1 -3 1 7.96 6.51
 -1 3 -1 5.36 4.33
 1 3 1 13.26 10.57
 -1 3 1 14.79 10.65
 -1 -3 -1 12.09 5.12
 1 -3 -1 9.73 5.19
 -1 -3 -1 -3.78 5.98
 1 -3 -1 16.51 9.65
 -1 -3 1 2.79 3.7
 1 -3 -1 8.42 8.44
 -1 3 1 6.24 5.62
 -1 -3 -1 8.56 6.98
 1 3 1 10.47 7.13
 1 3 1 8.53 5.4
 -1 -3 1 14.77 7.33
 -1 3 -1 -0.2 6.35
 1 3 -1 10.42 8.54
 -1 3 1 11.73 9.56
 -1 -3 -1 3.92 6.96
 1 3 1 5.53 5.79
 2 3 1 2328.66 108.2
 2 -3 -1 2160.35 102.69
 2 -3 -1 1386.79 85.98
 -2 -3 -1 2065.75 101.75
 -2 3 1 2295.52 114.68
 2 -3 1 2311.28 103.01
 -2 3 1 2834.14 89.33
 2 3 1 2277.25 109.38
 -2 -3 -1 2232.35 98.61
 -2 -3 1 2388.3 82.5
 -2 3 -1 2233.57 108.83
 2 3 -1 2516.69 87.59
 -2 -3 -1 1569.44 36.64
 2 -3 1 1850 99.16
 -2 3 -1 2879.25 134.4
 -2 -3 -1 657.87 63.7
 2 3 1 1411.52 42.24
 2 3 1 2014.28 86.55
 -2 -3 1 2391.48 111.31
 2 3 -1 2131.89 99.71
 2 3 -1 2297.15 95.04
 2 3 1 1525.74 80.64
 -2 3 -1 1438.88 94.83
 -2 3 1 2520.71 85.87
 -2 3 1 1906.51 101.62
 -2 3 -1 2440.85 68.96
 3 3 1 9.12 7.97
 3 3 1 7.58 5.05
 -3 3 1 2.17 2.45
 -3 3 -1 -3.25 8.74
 3 3 -1 7.74 8.11
 -3 -3 -1 4.76 2.79
 -3 3 -1 4.86 2.35
 3 -3 -1 -1.74 2.78
 3 3 -1 9.3 6.3
 -3 -3 -1 5.59 7.24
 -3 -3 1 6.27 7.01
 -3 -3 -1 6.89 7.31
 -3 3 1 1.85 4.74
 3 3 -1 7.87 5.38
 3 3 1 6.39 5.11
 -3 3 1 6.02 8.54
 -3 -3 -1 0.22 4.22
 -3 3 1 1.98 3.59
 3 -3 -1 -1.28 2.29
 -3 -3 1 0.55 2.6
 3 -3 -1 9.79 7.36
 3 -3 1 -6.56 6.6
 -3 3 -1 4.23 8.65
 3 -3 1 1.87 2.44
 3 -3 1 13.81 8.82
 -3 3 -1 3.32 9.33
 4 -3 1 1088.6 73.96
 -4 3 -1 857.25 77.1
 4 3 -1 1301.33 72.06
 4 -3 1 1088.08 65.33
 -4 3 1 1062.37 81.72
 -4 -3 1 1237.57 83.02
 -4 -3 -1 1250.07 82.47
 -4 3 -1 1035.54 84.6
 -4 -3 1 1413.9 71.51
 -4 -3 -1 1259.97 74.23
 4 3 1 1536.67 91.61
 4 -3 -1 1078.84 84.94
 -4 -3 -1 1298.73 54.26
 -4 3 -1 1449.06 103.16
 -4 -3 -1 1022.45 77.6
 4 3 -1 1436.66 74.78
 4 3 -1 1209.28 78.17
 4 -3 1 1126.23 75.78
 -4 3 -1 877.17 77.01
 4 3 1 1041.11 56.08
 4 -3 -1 1240.48 65.1
 -4 3 1 1407.98 74.35
 4 3 1 1205.75 79.07
 -4 3 1 982.03 79.28
 4 -3 -1 1031.44 86.36
 5 -3 1 -3.85 6.95
 -5 -3 1 1.45 3.66
 -5 -3 -1 -3.47 6.07
 -5 3 -1 1.9 2.96
 -5 -3 -1 -1.6 4.82
 5 3 1 0.34 2.4
 -5 3 -1 -0.61 3.06
 5 3 1 -1.26 5.72
 -5 -3 1 -1.35 8.26
 -5 3 -1 -1.91 6.61
 5 -3 1 7.21 6.42
 5 -3 -1 4.01 3.63
 5 3 -1 4.92 2.7
 5 3 1 2.34 4.12
 -5 3 1 1.29 3.36
 -5 3 1 -0.78 2.66
 -5 -3 -1 -0.78 4.27
 5 -3 -1 4.58 8.19
 5 -3 1 9.91 8.39
 -5 -3 -1 1.95 3
 5 3 -1 0.2 3.28
 -5 3 1 -0.73 2.47
 -6 3 -1 399.95 55.15
 6 3 -1 321.11 37.11
 -6 -3 -1 471.05 47.36
 -6 -3 1 572.8 51.21
 6 3 -1 514.23 54.13
 -6 3 -1 460.69 59.08
 -6 -3 -1 556.81 46.59
 -6 -3 -1 458.9 54.75
 6 3 -1 553.37 47.08
 -6 -3 1 528.69 56.72
 -6 3 1 395.59 55.15
 -6 3 1 513.5 50.93
 -6 -3 -1 520.89 61.02
 -6 3 1 461.82 55.54
 6 3 1 489.45 53.17
 6 -3 1 459.79 48.07
 6 -3 1 412.5 37.47
 -6 3 -1 410.21 58.79
 6 3 1 599.84 59.51
 6 -3 -1 399.03 61.29
 6 -3 1 448.31 49.78
 6 -3 -1 487.96 53.09
 -6 3 1 543.5 54.14
 7 3 -1 -3.62 7.21
 -7 3 1 -0.46 3.17
 7 3 1 -5.09 7.53
 -7 3 -1 2.34 10.21
 -7 -3 -1 -0.2 7.45
 -7 3 1 4.52 4.55
 -7 -3 -1 3.37 3.57
 -7 -3 -1 5.83 3.82
 7 3 -1 -2.53 3.22
 -7 -3 -1 -1.1 4.48
 7 -3 -1 -6.91 5.27
 7 -3 -1 1.53 7.49
 7 3 -1 0.23 7.2
 7 3 1 0.51 2.47
 -7 3 1 -4.84 7.94
 -7 3 1 1.82 2.53
 -7 -3 1 1.28 3.27
 -7 3 -1 4.01 9.27
 7 -3 1 0.38 4.43
 7 3 1 -9.33 5.45
 7 -3 1 0.33 5.03
 -7 -3 1 2.97 4.07
 7 3 1 0.77 3.82
 7 -3 1 -3.82 4.8
 7 -3 1 -2.51 6.5
 -8 -3 -1 50.5 21.18
 8 -3 -1 42.64 25.8
 8 -3 1 51.1 19.45
 -8 -3 -1 47.02 16.89
 -8 3 1 48.49 17.61
 -8 3 1 58.31 19.55
 8 -3 -1 53.96 22.12
 -8 -3 1 70.39 19.39
 -8 -3 -1 53.5 17.35
 -8 3 -1 42.69 19.05
 -8 -3 -1 51.99 17.86
 8 3 1 41.12 16.29
 -8 3 -1 26.61 15.21
 -8 3 1 38.96 18.29
 -8 -3 1 63.25 20.15
 8 3 1 50.03 11.94
 8 -3 1 55.89 16.98
 8 3 -1 82.24 20.27
 8 3 1 48.7 17.86
 8 3 1 61.41 20.49
 8 -3 1 54.62 24.68
 8 3 -1 69.44 16.41
 -8 -3 -1 46.52 21.29
 -8 3 1 65.94 21.6
 -9 3 1 17.41 10
 9 -3 -1 27.2 19.33
 9 3 1 17.63 12.48
 -9 -3 -1 10.09 6.67
 9 -3 1 20.31 10.36
 -9 3 1 20.19 9.08
 -9 -3 -1 18.13 16.77
 9 3 -1 34.32 12.77
 -9 -3 -1 24.64 13.24
 9 3 -1 33.65 12.55
 9 -3 -1 13.15 14.57
 9 3 1 17.93 11.71
 -9 -3 1 14.81 7.48
 -9 -3 1 27.12 11.18
 -9 3 1 3.32 5.85
 9 -3 1 15.83 9.95
 -9 -3 -1 22.23 11.73
 -9 -3 -1 15.12 10.92
 -9 3 -1 10.52 11.06
 9 3 -1 24.73 12.52
 -9 3 1 17.99 10.32
 9 3 1 14.66 10.01
 9 -3 1 23.11 17.51
 -9 3 -1 13.74 9.92
 -10 3 1 22.69 15.64
 10 3 1 18.75 13.17
 -10 3 -1 7.52 6.17
 10 -3 -1 18.9 8.31
 10 -3 1 27.99 13.18
 -10 3 -1 22.16 17.27
 10 3 1 18.11 11.92
 -10 -3 -1 28.49 17.2
 -10 -3 -1 8.26 6.88
 -10 3 1 9.3 9.87
 10 -3 -1 -6.73 10.04
 -10 3 1 14.72 9.2
 -10 -3 -1 12.06 12.54
 -10 -3 -1 10.29 8.48
 10 3 -1 26.62 10.32
 10 -3 1 15.6 13.67
 10 3 -1 16.01 9.12
 -10 -3 1 22.18 11.27
 10 3 -1 23.08 10.67
 -10 -3 1 24.3 13.42
 -10 3 1 15.07 10.45
 10 -3 1 16.71 14.71
 11 3 -1 53.48 17.57
 -11 -3 1 46.15 17.67
 11 3 1 34.93 18.4
 11 -3 1 52.19 23.05
 -11 -3 -1 15.18 9.42
 -11 -3 -1 22.06 12.18
 -11 3 1 39.59 23.44
 -11 3 1 38.53 16.3
 11 -3 1 30.36 24.69
 -11 3 1 25.09 11.99
 -11 -3 -1 30.31 14.29
 11 -3 -1 25.12 22.12
 -11 -3 -1 23.23 17.55
 11 -3 -1 18.14 19.07
 -11 3 1 33.39 20.1
 -11 3 -1 31.68 20.31
 -11 3 -1 15.47 11.62
 11 3 -1 42.44 16.35
 -11 -3 1 37.01 17.21
 11 3 -1 42.86 20.92
 11 3 1 38.13 19.86
 12 -3 1 194.13 50.46
 12 3 1 180.09 42.94
 -12 3 -1 195.07 46.88
 12 -3 -1 250.98 59.26
 12 -3 1 251.45 50.25
 12 3 -1 289.06 47.18
 -12 -3 -1 253.1 58.97
 12 3 -1 282.69 53.05
 12 3 1 248.55 50.92
 12 -3 1 159.87 49.72
 -12 3 -1 146.9 39.76
 -12 3 1 144.62 38.47
 12 3 -1 285.97 40.87
 -12 -3 -1 137.38 32.44
 -12 -3 -1 215.36 46.21
 12 -3 -1 134.63 48.2
 -12 -3 1 270.57 48.42
 -12 -3 1 274.84 48.32
 -12 -3 -1 257.65 51.96
 -12 3 1 193.55 46.06
 13 3 1 43.36 21.03
 -13 3 -1 40.65 20.56
 -13 -3 -1 29.02 16.74
 -13 -3 -1 36.18 21.18
 13 3 1 49.19 25.27
 13 3 -1 41.72 21.3
 13 3 -1 37.78 17.74
 13 -3 -1 23.43 21.83
 -13 3 1 32.71 23.87
 -13 3 1 15.91 12.28
 -13 -3 -1 26.94 18.24
 13 -3 1 31.61 16.88
 -13 -3 1 47.43 20.95
 -13 3 -1 21.55 11.61
 13 -3 1 42.23 23.7
 -13 -3 1 58.52 23.87
 13 -3 -1 37.47 21.37
 -14 3 1 437.76 73.68
 14 3 1 477.79 75.62
 14 3 -1 536.62 70.76
 -14 3 -1 438.67 78.93
 -14 3 1 418.47 71.47
 -14 -3 -1 405.82 70.55
 -14 -3 1 593.49 88.58
 14 3 -1 540.34 80.74
 -14 -3 -1 524.72 77.25
 -14 -3 1 652.36 80.36
 14 -3 1 390.8 76.74
 14 -3 1 396.74 83.14
 -14 3 -1 388.13 70.86
 -14 -3 1 543.5 75.65
 14 3 1 470.46 79.84
 14 -3 -1 447.94 85.97
 14 -3 -1 420.34 88.94
 -15 3 -1 5.46 13.36
 -15 3 -1 13.15 11.64
 15 -3 1 8.25 10.31
 15 3 -1 12.41 10.69
 -15 -3 1 22.22 22.2
 15 -3 -1 10.41 17.01
 15 -3 1 -33.96 24.44
 15 3 1 20.2 17.17
 15 3 1 5.74 16.22
 -15 -3 -1 -3.26 11.23
 -15 -3 1 11.24 11.28
 15 -3 -1 17.58 21.88
 -15 -3 -1 0.79 8.75
 -15 3 1 15.54 18.23
 -15 -3 1 -6.08 10.56
 -16 -3 -1 159.3 48.29
 -16 3 -1 118.73 42.78
 16 -3 1 142.51 51.24
 -16 -3 1 180.03 45.92
 -16 3 -1 151.52 49.18
 -16 -3 1 190.43 54.2
 -16 -3 1 170.59 44.7
 16 -3 -1 139.02 54.88
 16 3 1 160.96 46.04
 16 3 1 109.08 38.88
 16 3 -1 155.76 45.46
 16 -3 1 97.3 36.31
 16 -3 -1 141.73 53.15
 -16 3 1 93.63 36.98
 -16 -3 -1 168.93 51.31
 16 3 -1 179.68 52.21
 17 3 1 15.29 11.81
 -17 -3 1 -6.49 11.52
 17 -3 1 19.66 24.46
 -17 -3 -1 9.1 17.12
 -17 3 -1 17.7 4.66
 17 -3 -1 1.09 23.27
 17 3 -1 -2.44 15.14
 -17 -3 1 -7.14 12.06
 17 -3 1 -11.68 11.75
 -17 3 -1 13.84 5.9
 17 -3 -1 54.61 35.69
 17 3 -1 9.51 12.65
 -17 3 1 -2.26 11.72
 17 3 1 18.17 21.82
 -18 -3 -1 25.69 20.33
 -18 3 -1 11.1 10.36
 -18 3 -1 -0.39 4.13
 18 3 -1 -1.99 6.74
 -18 -3 -1 -0.47 5.28
 -18 3 -1 0.15 5.63
 -18 -3 1 -4.58 7.24
 18 3 -1 6.05 4.74
 -18 3 1 8.07 7.63
 -18 3 -1 6.61 11.06
 -18 -3 1 12.55 9.51
 18 3 1 4.59 7.89
 -18 -3 1 -7.83 8.62
 -18 3 1 -5.02 6.06
 18 3 -1 1.91 21.49
 -18 3 -1 -1.93 5.71
 -18 3 1 -6.88 6.58
 18 3 -1 8.69 8.89
 -18 3 -1 0.96 10.42
 -18 3 1 -11.36 14.12
 18 3 1 -8.38 14
 18 3 1 -5.28 12.32
 -18 3 1 3.44 4.07
 18 3 1 3.99 6.91
 18 3 1 -3.15 8.4
 18 3 1 -32.31 22.42
 -18 -3 1 15.5 11.88
 18 3 1 5.03 6.39
 -18 3 1 -11.26 8.73
 -18 -3 1 -14.33 8.53
 18 3 -1 6.19 9.46
 -18 -3 -1 3.33 7.75
 -18 -3 1 51.42 29.9
 -18 3 1 -20.74 11.11
 18 -3 -1 -3.65 18.58
 18 3 -1 18.17 16.53
 -18 -3 -1 -5.54 8.49
 -18 3 1 -13.39 9.21
 18 -3 1 -74.6 41.11
 18 3 1 11.52 16.1
 -18 3 -1 -14.64 15.85
 18 3 -1 16.84 21.49
 18 -3 -1 22.74 32.24
 -18 3 -1 -8.05 5.84
 -18 -3 -1 -0.98 6.1
 -18 -3 -1 5.1 8.34
 18 -3 1 -0.94 15.55
 -19 3 -1 8.41 9.78
 19 -3 1 -36.23 17.48
 19 3 1 7.94 18.31
 -19 -3 -1 18.52 21.76
 -19 -3 -1 12.03 9.06
 19 -3 1 24.33 18.94
 -19 3 -1 30.34 17.49
 19 3 1 -6.94 13.76
 -19 3 1 1.17 5.43
 -19 3 -1 -3.22 6.98
 -19 -3 -1 -7.92 15.19
 -19 3 1 8.39 4.99
 -19 3 -1 8.31 11.4
 -19 -3 -1 3.4 10.15
 -19 3 1 0.3 6.05
 19 3 1 -1.86 10.99
 19 3 1 13.57 8.12
 19 3 1 23.59 16.01
 19 3 -1 6.77 5.59
 19 -3 -1 17.85 28.15
 -19 3 -1 8.89 3.35
 19 3 1 0.55 10.16
 19 -3 -1 2.14 5.71
 -19 3 -1 28.9 22.83
 19 3 -1 -4.89 9.29
 -19 3 1 2.84 5.9
 -19 -3 1 6.93 6.26
 19 3 -1 15.59 16.76
 -19 3 -1 9.8 10.38
 -19 -3 1 8.43 4.17
 -19 -3 -1 8.85 9.53
 -19 3 1 21.43 11.83
 -19 -3 1 15.68 10.42
 -19 -3 1 43.8 28.64
 19 -3 -1 59.18 36.92
 19 3 -1 4.57 7.34
 19 3 -1 26.54 20.75
 19 3 1 -43.42 26.81
 19 3 1 0.12 13.33
 19 3 -1 13.6 11.68
 -19 -3 -1 8.63 7.59
 -19 -3 1 4.31 3.43
 19 -3 1 36.5 30.21
 -19 3 1 3.45 6.07
 -20 -3 -1 75.02 21.06
 -20 3 -1 80.41 24.74
 20 3 -1 39.05 17.13
 -20 -3 -1 81.53 23
 20 3 1 26 15.76
 20 3 -1 57.64 21.35
 20 3 1 64.18 19.86
 -20 3 -1 58.94 19.32
 20 3 1 63.65 20.14
 -20 -3 -1 67.13 22.57
 20 3 -1 45.5 16.51
 -20 3 -1 40.42 20.61
 -20 3 1 62.78 19.21
 -20 -3 1 48.17 16.79
 -20 -3 1 78.02 22.8
 20 3 -1 47.71 20.58
 -20 -3 -1 53.72 18.14
 20 3 1 53.78 22.11
 20 -3 -1 59.27 25.43
 -20 3 1 66.44 21.59
 -20 3 1 58.7 18.2
 -20 -3 -1 94.2 26.03
 -20 -3 1 84.89 22.55
 -20 3 -1 52.28 18.49
 20 3 1 62.02 24.25
 -20 3 1 80.38 22.45
 -20 3 -1 59.24 21.22
 -20 3 -1 71.85 23.44
 20 -3 1 74.37 26.35
 20 3 1 78.48 28.99
 20 3 -1 110.21 38.38
 -20 3 1 53.91 15.72
 -20 -3 1 66.74 20.38
 -20 3 1 63.3 19.47
 -21 -3 -1 8.25 10.74
 21 -3 -1 -3.05 7.22
 -21 -3 1 1.03 3.94
 -21 3 -1 8.57 7.61
 -21 3 -1 10.15 8.52
 21 3 1 15.5 12.44
 21 3 1 17.29 10.95
 21 -3 -1 3.47 10.78
 21 3 1 16.14 18.38
 -21 3 1 0.88 6.13
 -21 3 -1 28.2 15.65
 -21 3 -1 11.05 11.42
 -21 3 1 19.23 11.67
 -21 -3 -1 26.61 15.24
 -21 -3 -1 8.5 8.92
 21 -3 1 14.16 12.51
 -21 -3 1 13.78 9.72
 21 3 -1 16.56 11.62
 21 3 1 -4.85 6.62
 -21 3 1 18.15 10.51
 21 3 -1 15.06 12.49
 21 -3 1 2.01 7.6
 -21 -3 1 16.45 10.31
 -21 3 1 3.27 7.45
 21 3 -1 27.09 16.84
 21 3 1 18.41 4.7
 -21 3 -1 12.32 7.42
 21 3 1 23.2 13.04
 -21 3 -1 18.63 13.34
 21 3 -1 30.58 18.48
 21 3 -1 3.13 6.48
 -21 -3 1 9.21 2.3
 -21 -3 -1 17.38 8.25
 -21 3 1 21.06 12.2
 -21 3 1 19.58 9.64
 -21 -3 -1 29.47 13.29
 22 -3 1 9.34 3.12
 -22 -3 -1 14.8 11.95
 -22 -3 1 11.22 7.61
 -22 3 1 2.13 5.45
 22 3 1 -15.35 14.13
 -22 -3 1 6.06 3.87
 -22 -3 -1 15.18 10.29
 22 3 -1 10.16 10.44
 22 3 1 17.51 7.84
 -22 3 1 14.69 7.09
 22 3 1 4.31 8.04
 -22 3 -1 12.9 12.33
 22 3 1 -3.86 14.71
 -22 -3 -1 10.19 8.66
 22 3 -1 0.68 2.37
 -22 -3 -1 9.95 10.71
 -22 -3 -1 4.05 3.71
 -22 3 -1 10.87 11.07
 22 3 -1 -3.48 7.44
 22 3 1 13.73 11.53
 -22 3 1 6.06 7.32
 -22 3 1 8.52 9.56
 -22 3 1 11.79 10.97
 22 -3 -1 11.11 12.88
 22 3 -1 10.51 11.01
 22 -3 -1 1.91 13.02
 -22 3 -1 17.72 13.37
 22 -3 1 17.76 14.82
 -22 3 -1 8.08 8.15
 22 3 1 2.13 4.98
 -22 -3 1 2.53 6.48
 -22 3 -1 12.48 12.03
 -22 -3 1 10.97 11.02
 22 3 -1 11.66 11.8
 -22 3 1 -1.96 7.89
 -23 -3 -1 -3.36 11.7
 23 3 1 1.69 4.71
 -23 3 1 27.27 15.19
 -23 3 1 13.72 9.95
 23 -3 -1 -5.57 14.04
 23 -3 1 6.63 7.51
 -23 -3 -1 7.82 8.62
 23 3 1 13.96 13.08
 -23 -3 1 4.27 3.86
 -23 3 1 11.95 6.24
 -23 3 -1 21.13 12.81
 -23 -3 -1 2.3 3.48
 -23 -3 1 13.98 10.66
 23 3 1 18.39 13
 23 -3 -1 -2.6 3.39
 23 3 1 7.18 4.85
 -23 -3 -1 19.78 10.99
 23 3 -1 12.38 10.56
 -23 -3 -1 9.3 5.04
 -23 3 1 18.43 12.59
 23 -3 1 12.86 9.22
 -23 3 1 35.27 17.45
 23 3 -1 7.62 7.85
 23 3 -1 0.94 5.09
 -23 3 -1 8.79 9.23
 -23 -3 1 8.56 7.47
 23 3 -1 8.49 7.78
 23 3 1 23.59 17.01
 -23 3 -1 9.25 9.04
 -23 -3 1 16.29 7.83
 -23 3 -1 12.74 8.31
 23 3 -1 9.83 11.7
 -24 -3 -1 1.15 5.42
 24 3 1 -8.46 11.02
 -24 3 1 5 2.76
 24 -3 -1 -5.09 10.45
 24 -3 1 5.37 5.64
 24 3 1 -0.18 8.07
 24 -3 1 -6.69 13.61
 24 3 -1 -0.33 4.31
 -24 -3 -1 -3.4 5.62
 -24 3 -1 9.89 6.29
 -24 3 1 -4.32 6.92
 -24 3 -1 -3.84 9.56
 -24 -3 1 12 10.96
 24 3 1 1.48 4.68
 -24 3 1 -6.89 2.47
 -24 3 -1 -1.93 8.27
 -24 3 -1 8.68 8.21
 24 3 -1 -10.86 12.83
 -24 3 1 -3.46 9.14
 24 3 1 11.1 14.43
 -24 3 -1 4.01 6.95
 24 3 1 17 13.22
 -24 3 1 -3.94 9.46
 -24 -3 1 -0.78 4.57
 24 3 -1 8.55 10.33
 -24 -3 -1 13.14 12.07
 -24 -3 -1 4.51 1.65
 24 3 -1 5.8 6.96
 -24 -3 1 7.99 8.58
 24 3 -1 1.95 6.28
 -24 -3 1 16.03 12.14
 24 -3 -1 3.36 8
 -24 -3 -1 9.31 11.23
 -25 -3 -1 -11.25 11.31
 -25 3 1 3.74 7.79
 25 -3 -1 -12.19 11.06
 -25 3 1 -8.52 8.79
 25 3 1 4.06 3.78
 -25 3 1 -5.35 3.41
 -25 -3 -1 -0.87 6.24
 25 3 -1 7.42 8.45
 -25 3 1 -7.19 12.25
 25 3 1 0.56 5.51
 -25 -3 1 -3.71 9.39
 -25 3 -1 -0.24 4.14
 -25 -3 1 -0.47 5.18
 25 -3 -1 -0.08 10.48
 25 -3 1 -11.09 14.67
 -25 -3 1 2.38 8.26
 -25 3 -1 -3.28 8.8
 25 3 -1 5.15 6.25
 25 3 -1 -8.33 12.13
 25 3 1 -22.39 16.81
 25 3 -1 -7.35 12.68
 -25 3 -1 6.21 7.97
 -25 -3 1 -9.48 5.64
 -25 -3 -1 -3.11 4.74
 -25 3 -1 2.91 4.99
 25 3 -1 3.32 8.22
 25 3 1 -13.61 8.44
 -25 -3 -1 5.9 6.97
 -25 3 -1 -10.14 13.41
 -26 3 1 1.04 4.44
 26 3 -1 -0.35 9.71
 26 3 1 9.15 7.31
 26 -3 1 4.55 6.98
 -26 3 -1 5.66 8.65
 -26 -3 1 3.54 5.15
 26 -3 -1 8.94 9.27
 26 3 1 -4.76 11.73
 -26 3 -1 3.47 6.84
 26 3 -1 8.48 6.92
 -26 3 1 6.2 6.52
 26 3 1 14.93 12.15
 26 3 -1 -3.57 8.43
 -26 -3 1 -11.05 10.33
 -26 3 -1 3.59 5.95
 -26 -3 -1 -4.97 8.94
 26 3 1 -0.07 12.69
 -26 3 1 -2.85 10.44
 -26 3 -1 1.86 3.86
 26 3 -1 1.08 5.5
 -26 -3 -1 9.27 9.53
 26 3 -1 7.81 11.04
 26 -3 -1 3.95 6.19
 -26 3 -1 -2.5 3.86
 -26 -3 -1 -0.66 8.9
 -26 -3 1 3.43 5.18
 -26 3 1 -17.87 13.71
 -26 -3 1 9.99 5.26
 -26 -3 -1 12.9 10.09
 26 -3 1 0.45 5.28
 -27 -3 1 0.33 3.81
 -27 -3 -1 13.1 13.9
 -27 -3 -1 1.02 7.87
 -27 3 1 -16.13 10.75
 27 3 -1 -3.45 6.92
 -27 3 1 -1.97 2.07
 -27 3 1 -6.59 7.69
 27 3 -1 -6.19 8.23
 27 -3 1 5.79 5.1
 -27 -3 1 -2.99 6.38
 27 -3 -1 -0.28 6.88
 -27 -3 1 -4.67 4.71
 -27 3 -1 1.78 5.82
 -27 3 -1 -1.28 2.81
 27 3 -1 6.18 11.09
 -27 -3 -1 -4.22 10.1
 -27 3 -1 -0.97 4.51
 27 3 1 -2.82 8.34
 27 3 -1 1.72 8.39
 27 3 1 10.36 6.3
 -27 -3 1 2.4 6.15
 27 3 -1 1.21 6.79
 -27 3 -1 11.36 11.28
 27 -3 1 -10.31 9.08
 27 -3 -1 16.29 13.53
 -27 -3 -1 1.78 2.24
 27 3 1 4.74 3.9
 27 -3 1 3.06 6.65
 27 3 1 0.79 3.73
 -28 3 -1 14.77 9.6
 28 -3 -1 13.42 13.97
 28 3 -1 10.71 3.14
 -28 -3 -1 38.8 15.39
 28 -3 1 21.23 12.6
 -28 3 1 25.35 13.45
 28 3 1 6.39 7.42
 -28 -3 1 18.6 12.16
 -28 3 -1 27.99 14.25
 -28 3 1 17.63 5.62
 28 -3 -1 9.76 9.84
 -28 -3 1 19.86 12.15
 28 -3 -1 2.7 4.74
 28 3 1 19.1 14.09
 28 3 -1 -2.21 13.69
 28 3 1 13.13 10.57
 28 3 -1 5.88 5.54
 -28 -3 1 11.83 10.12
 28 -3 1 1.86 4.3
 -28 -3 1 7.22 6.87
 28 3 1 9.73 6.64
 28 3 -1 9.74 8.07
 -28 -3 -1 22 13.15
 28 3 -1 18.9 12.71
 -28 -3 -1 30.94 14.91
 -28 3 -1 19.94 11.69
 -28 3 -1 9.97 4.64
 -28 3 1 23.3 11.84
 -28 -3 -1 13.83 14.17
 28 -3 1 18.12 9.74
 29 3 1 -6.35 7.06
 -29 -3 1 9.76 9.3
 29 3 1 9.02 11.67
 -29 3 1 -3.77 6.31
 29 3 -1 -2.3 2.06
 -29 3 -1 15.21 10.53
 29 -3 -1 -5.44 8.47
 29 3 -1 11.08 10.26
 -29 3 1 -3 6.76
 29 3 -1 12.91 12
 -29 3 -1 -3.34 8.25
 29 -3 -1 -3.86 3.92
 29 -3 -1 -10.8 9.67
 29 -3 1 -12.53 11.34
 -29 -3 -1 10.65 8.17
 -29 -3 -1 -0.88 4.51
 -29 -3 1 0.18 6.01
 -29 3 1 1.33 5.54
 -29 -3 -1 2.02 5.56
 29 3 1 5 8.77
 29 -3 -1 -2.66 5.24
 -29 -3 -1 -12.17 11.54
 29 -3 1 -7.61 11.84
 29 3 -1 -10.72 10.11
 -29 -3 1 -8.31 2.22
 29 3 1 -1.05 10.69
 -29 3 -1 3.65 4.49
 29 3 -1 9.75 9.76
 29 -3 1 -1.97 6.22
 -29 -3 1 2.54 6.68
 -29 3 -1 10.46 10.09
 30 3 1 -7.06 8.76
 30 3 -1 3.39 3.88
 -30 3 -1 -3.61 5.86
 -30 -3 -1 2.76 6.96
 -30 3 -1 -18.56 13.71
 30 3 1 0.67 5.02
 30 -3 -1 3.34 3.51
 -30 -3 1 -0.2 6.67
 30 -3 -1 5.15 5.1
 30 -3 -1 13.27 9.21
 -30 3 -1 -1.44 4.23
 30 -3 1 3.03 7.9
 30 3 1 -5.43 4.4
 -30 -3 1 15.23 11.05
 -30 3 -1 4.89 2.95
 30 3 -1 2.72 4.36
 30 3 -1 -0.98 4.91
 -30 3 1 0.35 6.03
 -30 -3 -1 -10.33 9.72
 -30 3 1 3.72 6.43
 -30 -3 1 -14.04 9.01
 30 3 -1 8.72 7.12
 30 -3 1 -8.45 7.65
 -30 3 1 6.63 7.64
 30 -3 1 -1.09 3.9
 30 -3 -1 0.41 3.51
 30 3 1 -1.15 4.57
 31 3 -1 11.15 5.81
 31 -3 1 0.09 3.4
 -31 3 1 17.3 10.66
 31 -3 -1 3.93 4.19
 31 3 1 -11.05 9.07
 -31 -3 -1 4.1 4.54
 -31 -3 1 4.38 2.33
 31 3 1 2.09 3.5
 31 -3 -1 10.41 6.47
 31 3 -1 1.87 6.13
 -31 3 -1 11.88 4.99
 -31 -3 -1 9.7 6.02
 31 -3 -1 -5.23 7
 31 3 1 14.67 8.23
 31 3 -1 -21.57 9.79
 -31 -3 1 -7.23 7.78
 31 3 1 2.73 7.72
 -31 -3 1 7.92 7.32
 31 -3 1 2.11 2.15
 0 -4 -1 10.37 6.2
 0 4 1 -2.03 4.81
 0 4 -1 8.51 8.38
 0 4 1 -0.44 1.76
 0 4 -1 2.75 5.59
 0 4 1 -5.77 6.28
 0 -4 1 -2.82 6.67
 0 -4 -1 -3.83 5.22
 0 4 -1 3.86 4.12
 0 4 1 4.14 8.64
 0 -4 1 6.05 5.36
 0 -4 -1 -3.13 5.17
 -1 -4 -1 3.46 3.53
 1 -4 -1 12.69 2.86
 -1 -4 1 17.08 12.34
 -1 -4 -1 11.49 7.07
 1 4 -1 19.94 9.92
 1 -4 1 19.53 13.29
 1 4 1 12.45 11.06
 -1 4 1 18.64 14.39
 -1 4 1 7.57 3.95
 -1 -4 -1 17.64 6.54
 -1 -4 1 18.06 8.35
 1 4 1 20.78 11.57
 -1 4 1 17.71 6.85
 1 -4 -1 17.17 9.58
 1 4 -1 20.4 9.27
 -1 4 1 15.59 11.11
 1 4 1 12.25 8.12
 -1 4 -1 20.36 7.66
 -1 4 -1 18.14 10.56
 -1 4 -1 20.6 11.18
 -1 4 -1 18.71 10.95
 1 4 -1 12.2 10.81
 -1 -4 -1 15.22 10.41
 -1 4 -1 9.83 9.26
 1 -4 -1 13.02 8.51
 -1 4 1 21.38 15.86
 2 -4 -1 701.02 69.37
 -2 4 1 697.42 71.2
 -2 4 1 682.45 54.22
 2 -4 1 660.67 72.9
 2 -4 -1 733.29 67.6
 2 4 -1 697.01 65.25
 -2 4 1 789.07 54.8
 -2 4 -1 618.46 67.71
 -2 -4 1 711.5 75.81
 -2 -4 -1 649.03 64.8
 2 4 1 734.06 68.09
 -2 -4 -1 707.18 64.66
 2 -4 -1 618.24 59.97
 2 4 1 700.81 71.9
 -2 4 -1 806.92 50.83
 -2 4 -1 816.75 79.78
 2 4 -1 669.52 62.25
 -2 4 -1 623.26 66.85
 -2 4 1 592.49 66.76
 2 4 1 723.57 64.53
 -2 4 -1 620.21 69.96
 -2 -4 -1 690.34 62.63
 -2 -4 1 730.11 55.06
 -2 -4 -1 413.3 20.45
 2 4 -1 875.75 59.82
 -2 4 1 618.98 68.19
 3 -4 1 107.17 11.28
 -3 4 -1 158.84 36.12
 3 -4 -1 133.34 15.71
 3 -4 -1 138.26 31.83
 -3 4 -1 178.46 38.43
 -3 -4 -1 156.12 31.49
 3 -4 -1 160.87 35.71
 -3 4 -1 165.73 35.59
 -3 -4 1 173.99 13.92
 -3 4 -1 158.62 36.71
 -3 4 1 194.14 30.23
 3 4 1 162.45 32.81
 3 4 1 187.81 32.42
 3 4 -1 180.1 33.1
 3 4 1 174.15 36.72
 -3 -4 -1 160.94 30.01
 3 4 -1 203.08 29.64
 -3 -4 -1 139.13 29.39
 -3 -4 1 183.96 37.55
 -3 -4 1 186.11 28.66
 -3 4 1 159.9 26.98
 -3 4 1 123.1 31.51
 3 4 -1 158.48 29.43
 -3 4 1 126.65 32.34
 3 4 1 170.78 29.01
 -3 4 1 165.06 34.39
 3 -4 1 134.27 30
 3 -4 1 154.03 31.57
 -4 4 1 278.71 37.35
 4 -4 1 251.65 42.06
 4 4 1 309.02 48.07
 -4 4 -1 235.68 44.85
 4 -4 -1 222.98 43.05
 -4 4 1 192.82 39.57
 4 4 -1 227.61 37.33
 -4 4 -1 232.67 44.66
 4 -4 -1 228.5 44.47
 4 -4 1 231.56 35.57
 -4 4 1 190.13 40.47
 -4 4 -1 252.84 47.04
 -4 -4 -1 264.46 43.04
 -4 -4 -1 263.15 37.45
 -4 4 -1 218.05 42.84
 4 4 1 199.8 34.1
 4 4 1 212.88 37.65
 -4 -4 -1 213.86 39.7
 4 4 -1 257.55 36.72
 4 4 1 255.89 36.94
 -4 -4 1 272.69 44.53
 4 4 1 207.5 23.85
 4 4 -1 289.27 37.55
 4 -4 1 198.1 35.04
 4 -4 -1 283.97 30.72
 -4 -4 -1 210.84 22.88
 -4 -4 1 267.7 35.86
 5 4 -1 -0.21 6.11
 5 4 1 -0.54 6.49
 -5 -4 -1 0.59 9.12
 5 -4 -1 9.28 7.32
 5 4 1 5.03 9.16
 -5 -4 1 7.14 7.32
 5 -4 1 5.26 7.56
 -5 4 -1 0.25 7.73
 -5 4 1 -1.7 4.33
 5 4 -1 5.7 5.85
 5 -4 -1 2.34 7.64
 -5 4 -1 5.39 4.49
 -5 -4 1 11.66 12.37
 -5 4 -1 4.23 9.15
 -5 4 -1 -1.68 4.6
 5 -4 -1 4.47 9.75
 -5 -4 -1 7.2 7.52
 -5 -4 -1 7.87 6.12
 -5 4 1 8.33 5.07
 -5 -4 -1 9.25 6.33
 -5 4 1 8.76 9.34
 5 4 1 1.56 3.7
 5 -4 1 -2.26 4.79
 5 4 -1 4.83 5.95
 5 4 1 -1.98 2.63
 -6 4 -1 1654.08 128.35
 -6 -4 -1 2156.64 93.57
 -6 4 1 2079.77 114.25
 6 -4 -1 2116.06 116.77
 6 4 1 2298.52 136.79
 -6 4 -1 1749.04 127.61
 -6 4 1 1618.18 124.27
 6 4 -1 2153.06 112.63
 6 4 -1 2224.99 104.88
 -6 -4 -1 2156.08 130.67
 6 -4 1 1762.12 102.82
 -6 4 -1 1402.22 112.66
 6 4 1 1464.87 102.18
 6 4 1 2209.7 104.94
 -6 -4 -1 2138.64 106.8
 -6 -4 -1 1690.59 116.38
 6 4 -1 1948.25 115.39
 6 -4 1 1900.51 104.58
 -6 4 1 1802.72 125.39
 -6 -4 1 1983.74 123.79
 -6 -4 1 2202.13 110.56
 6 -4 -1 1666.53 139.23
 -7 4 -1 4.92 7.64
 7 -4 1 3.57 7.26
 -7 -4 -1 11.18 8.35
 -7 4 1 2.06 7.5
 7 -4 1 11.82 8.92
 7 4 -1 3.1 4.13
 7 4 -1 14.62 7.51
 -7 -4 -1 7.26 9.29
 -7 -4 1 -0.18 7.4
 -7 4 -1 5.8 8.97
 7 -4 -1 4.41 11.01
 7 4 1 -0.67 2.28
 7 4 -1 2.03 5.38
 -7 -4 1 9.92 9.84
 7 4 1 6.36 5.2
 7 4 1 4.3 8.78
 -7 4 1 6.81 12.13
 -7 4 1 11.87 10.73
 7 4 1 7.76 2.64
 -7 -4 -1 17.61 10.67
 7 -4 -1 5.7 12.03
 7 -4 1 2.86 7.08
 -7 -4 -1 13.74 11.35
 -8 -4 1 1960.47 112.35
 -8 4 1 1472.16 107.23
 -8 -4 1 1775.25 119.46
 -8 -4 -1 1918.15 106
 -8 4 1 1640.39 122.06
 -8 -4 -1 1490.15 114.28
 8 -4 -1 1808.47 127.91
 8 -4 1 1754.46 102.39
 8 4 1 1429.51 105.92
 8 -4 1 1474.61 116.77
 8 4 -1 1803.81 112.88
 8 4 -1 1731.38 115.58
 -8 -4 -1 1854.54 134.48
 -8 4 -1 1280.33 115.74
 8 4 1 1645.51 105.91
 8 -4 -1 1305.86 133.64
 8 4 1 1815.14 124.63
 8 -4 1 1702.33 104.47
 -8 -4 -1 2082.78 113.85
 -8 4 1 1863.14 117.88
 8 4 -1 2230.73 110.59
 -8 4 -1 1566.47 126.89
 -8 4 1 1515.77 127.71
 8 4 -1 2207.75 105.94
 -9 -4 -1 61.4 25.44
 9 4 -1 82.73 26.65
 9 4 1 70.66 20.61
 -9 -4 -1 108.5 34.81
 -9 4 -1 73.66 26.92
 9 4 -1 103.1 22.51
 -9 -4 1 97.32 27.9
 -9 4 1 64.02 25.69
 9 -4 -1 71.1 36.5
 9 -4 -1 87.17 29.28
 9 4 1 76.87 25.47
 9 4 1 88.67 25.43
 -9 4 1 97.68 31.54
 9 -4 1 48.32 24.42
 -9 4 1 90.47 26.87
 9 -4 1 95.97 26.2
 -9 -4 -1 48.24 20.06
 -9 -4 -1 105.31 27.04
 9 -4 1 99.39 24.57
 9 4 -1 109.87 23.52
 -9 4 -1 75.07 29.04
 -9 -4 -1 98.67 25.39
 -9 4 1 66.45 22.5
 -9 -4 1 102.91 27.13
 9 4 -1 97.55 27.02
 -10 4 1 622.92 80.69
 10 4 -1 871.38 72.78
 -10 -4 -1 797.54 80.19
 10 -4 1 664.58 70.27
 10 -4 -1 671.71 89.45
 -10 -4 -1 619.86 78.59
 -10 4 1 550.29 80.42
 -10 -4 1 804.93 78.67
 -10 -4 1 692.05 77.89
 -10 4 1 510.36 67.83
 -10 4 1 792.67 80.49
 10 4 1 621.66 70.82
 10 -4 -1 463.78 86.12
 -10 -4 -1 599.47 84.62
 10 4 -1 639.59 74.62
 -10 4 -1 468.55 73.24
 10 4 1 540.57 70.78
 10 -4 1 543.3 79.33
 10 4 -1 867.14 67.94
 -10 4 -1 543.63 78.57
 10 4 -1 710.22 77.76
 -10 -4 -1 480.83 64.16
 11 -4 -1 0.18 14.36
 11 4 1 5.91 4.75
 11 4 -1 11.22 6.98
 11 -4 1 -17.96 15.17
 -11 -4 -1 2.31 3.77
 -11 -4 -1 13.99 15.63
 -11 4 1 6.78 10.18
 -11 -4 1 16.51 10.36
 -11 4 1 9.93 7.92
 -11 4 -1 20.78 17.71
 11 4 1 31.58 19.18
 11 4 -1 12.26 7.37
 11 -4 -1 10.7 9.12
 11 4 -1 9.16 10.82
 -11 4 -1 19.59 18.23
 -11 -4 -1 14.3 11.81
 -11 -4 1 11.33 5.49
 -11 4 1 0.78 16.56
 -11 4 1 8.21 11.88
 -11 -4 -1 27.69 19.03
 -12 4 -1 342.2 66.25
 12 4 1 359.93 62.16
 -12 4 1 283.07 55.21
 -12 4 1 343.59 66.54
 -12 -4 1 462.93 66.32
 -12 -4 -1 218.78 44.25
 -12 4 -1 244.27 54.13
 -12 -4 -1 318.25 67.2
 12 -4 1 321.39 67.29
 -12 -4 -1 335.53 63.04
 12 -4 1 333.06 74.81
 12 4 1 284.07 56.68
 -12 -4 -1 347.15 60.72
 12 4 -1 393.2 62.71
 12 -4 -1 350.47 69.39
 12 -4 -1 287.87 72.6
 -12 -4 1 441.97 64.19
 13 -4 -1 52.94 27.51
 -13 4 -1 40.02 22.26
 -13 -4 -1 14.25 12.51
 -13 4 1 28.13 19.57
 -13 -4 1 38.12 21.05
 13 4 1 44.06 25.25
 -13 -4 -1 41.38 20.24
 13 -4 1 24.58 23.54
 -13 4 -1 25.77 17.69
 13 4 1 41.81 23.1
 -13 4 1 26.53 14.62
 13 4 -1 42.1 21.37
 -13 -4 1 44.02 20.86
 13 -4 -1 38.27 24.78
 13 -4 1 7.55 10.24
 -14 -4 -1 99.66 41.09
 -14 -4 1 85.39 29.87
 14 4 1 50.99 26.52
 14 -4 -1 48.57 28.62
 -14 -4 1 92.07 29.15
 -14 4 -1 51.26 22.34
 14 -4 -1 58.3 26.13
 -14 4 1 55.62 23.29
 -14 -4 -1 100.45 37.44
 14 -4 1 98.4 46.38
 14 4 -1 77.21 29.81
 -14 4 -1 79.53 31.58
 14 -4 1 22.88 16.59
 -14 4 1 64.69 28.64
 14 4 1 42.14 24.13
 -15 -4 1 100.48 33.3
 -15 4 -1 57.4 28.61
 15 4 1 71.49 30.32
 -15 -4 1 78.35 26.93
 15 4 1 49.92 21.13
 15 4 -1 129.48 42.55
 -15 4 -1 97.19 41.05
 15 -4 1 43.46 32.88
 -15 4 1 63.9 29.89
 15 -4 -1 49.29 34.77
 15 -4 1 97.1 43.16
 15 -4 -1 113.28 47.22
 -15 -4 1 117.23 41.06
 -15 -4 -1 114.74 39.65
 -16 -4 1 1127.65 136.51
 16 -4 -1 712.94 129.51
 -16 4 1 673.61 99.15
 16 -4 1 592.67 112.63
 16 -4 -1 833.53 130.07
 -16 -4 1 996.85 115.52
 -16 4 -1 793.53 114.45
 -16 4 -1 732.12 108.72
 -16 -4 -1 818.71 115.48
 16 -4 1 790 121.9
 16 4 1 703.65 103.72
 16 4 1 741.09 111.98
 -16 -4 1 1035.04 111.56
 16 4 -1 926.11 116.62
 -17 -4 -1 6.03 12.31
 17 4 1 12.3 15.76
 17 -4 -1 43.81 36.78
 -17 4 1 13.54 9.7
 -17 -4 -1 10.47 9.81
 -17 4 1 3.28 3.45
 17 4 -1 27.49 13.73
 17 -4 1 34.9 31.24
 -17 4 -1 29 22.36
 17 4 -1 15.21 11.05
 17 4 -1 6.6 8.69
 17 4 -1 6.72 4.56
 -17 4 -1 13.62 9
 -17 -4 1 16.47 18.72
 -17 4 -1 1.3 10.24
 17 4 -1 9.13 9.94
 17 4 1 2.69 7.68
 17 4 1 11.6 15.66
 -17 4 -1 14.05 9.88
 -17 -4 1 13.36 8.93
 -17 4 1 11.51 18.34
 -17 -4 -1 14.86 7.51
 -17 4 -1 2.33 6.9
 -17 -4 1 7.12 7.46
 17 -4 1 17.87 13.22
 17 4 1 8.44 16.26
 -17 4 1 -2.94 6.13
 17 4 1 11.81 10.2
 -17 4 1 9.96 3.5
 -17 -4 1 -1.64 7.06
 17 -4 -1 11.89 16.25
 17 4 1 6.86 6.04
 -17 4 -1 7.95 12.97
 17 4 -1 35.22 27.95
 17 4 1 4.27 14.31
 -17 -4 1 -1.92 6.74
 -18 -4 1 956.94 76.82
 -18 4 1 651.8 64.29
 -18 4 -1 408.95 62.07
 18 4 -1 975.04 84.9
 18 4 -1 755.46 76.06
 -18 4 1 709.33 63.84
 -18 4 1 789.64 71.89
 -18 4 -1 746.34 68.8
 -18 4 -1 843.03 124.88
 -18 4 -1 655.67 62.33
 -18 -4 -1 970.92 73.42
 18 4 1 711.45 73.93
 18 4 -1 921.26 82.85
 -18 -4 -1 974.8 129.55
 -18 -4 1 933.91 69.94
 -18 4 1 552.96 59.85
 -18 -4 -1 829.36 69.65
 18 4 1 665.37 110.13
 -18 4 -1 763.31 119.32
 18 4 -1 1326.47 127.27
 18 4 1 890.65 108.06
 -18 -4 -1 980.25 79.2
 -18 4 -1 607.55 62.03
 18 4 1 716.92 109.22
 18 -4 1 759.42 128.85
 18 4 -1 928.92 123.39
 18 4 -1 823.04 72.96
 18 4 1 825.97 82.75
 18 4 1 776.55 75.64
 -18 -4 1 801.71 69.56
 -18 4 -1 740.94 74.08
 -18 4 1 685.86 65.98
 -18 -4 -1 858.52 75.69
 -18 -4 1 1050.6 139.96
 -18 4 1 743.55 117.26
 -18 -4 1 1074.36 129.41
 18 -4 1 530.91 110.15
 -18 4 1 815.85 70.61
 18 -4 -1 571.23 109.44
 18 4 1 556.47 63.86
 18 4 1 855.75 85.48
 18 -4 -1 712.47 137.49
 -18 -4 1 868.96 70.09
 -18 4 -1 670.63 77.8
 19 4 1 24.3 21.45
 -19 4 1 -1.54 8.79
 -19 4 -1 8.36 6.33
 -19 4 -1 4.89 4.86
 -19 4 1 5.91 2.57
 19 4 -1 16.76 11.76
 -19 -4 -1 5.25 3.97
 -19 4 -1 -4.64 9.55
 -19 4 1 7.37 9.37
 -19 -4 1 1.52 5.17
 -19 -4 -1 15.2 10.62
 19 -4 -1 4.83 10.67
 19 4 1 7.08 3.88
 -19 4 -1 -3.12 7.91
 -19 4 -1 6.86 4.03
 19 4 1 25.55 15.76
 19 4 1 2.12 7.2
 -19 -4 -1 8.67 6.98
 -19 -4 1 2.09 6.6
 19 4 1 0.18 6.25
 -19 4 1 -3.37 8.37
 19 4 1 -3.14 11.64
 19 4 -1 3.67 7.35
 19 4 -1 1.09 9.29
 -19 4 -1 -6.42 5.1
 19 4 -1 11.74 10.49
 19 4 -1 9.48 6.3
 -19 4 -1 2.94 4.31
 -19 4 1 1.91 2.86
 19 4 1 -1.37 15.12
 -19 -4 1 7.47 7.52
 -19 4 1 7.72 8.08
 -19 -4 1 4.73 7.18
 -19 4 -1 -15.48 10.29
 -19 -4 -1 7.48 4.34
 -19 -4 -1 -4.95 8.66
 20 4 1 693.98 80.85
 -20 4 -1 590.15 64.93
 -20 -4 1 790.28 70.52
 20 4 -1 667.5 73.28
 20 4 -1 674.73 75.85
 -20 -4 -1 706.11 68.08
 -20 4 -1 599.08 69.64
 -20 4 1 489.81 57.93
 -20 4 -1 648.92 65.03
 -20 4 1 619.34 66.88
 20 4 1 669.09 95.81
 -20 -4 -1 900.53 82.03
 20 -4 -1 493.42 70.82
 -20 -4 1 779.67 68.57
 -20 4 -1 630.31 66.24
 20 4 1 559.51 66.98
 20 4 -1 879.22 112.62
 -20 -4 -1 682.63 70.69
 20 4 1 538.11 67.15
 -20 4 1 702.03 69.31
 -20 4 1 646.41 67.09
 -20 4 -1 395.57 68.83
 20 4 1 603.76 70.33
 -20 4 1 624.73 65.16
 -20 4 1 618.52 62.25
 -20 -4 -1 885.74 76.97
 20 4 -1 601.3 68.91
 -20 4 -1 654.98 76.62
 20 4 -1 616.62 65.4
 -20 -4 1 662.43 66.13
 -20 -4 1 831.15 74.36
 -20 4 -1 615.9 72.36
 20 4 1 608.44 73.73
 -20 -4 -1 506.49 57.38
 21 4 1 8.33 2.55
 -21 4 -1 9.91 9.47
 21 4 -1 16.88 10.54
 -21 -4 -1 9.45 4.38
 -21 4 -1 12.8 10.54
 -21 4 1 14.95 12.05
 21 -4 -1 30.31 20.9
 -21 -4 -1 13.08 9.97
 -21 4 1 14.8 10.81
 -21 -4 1 23.01 10.9
 -21 -4 -1 11.82 9.18
 -21 -4 -1 32.31 15.89
 21 4 -1 30.58 19.63
 21 4 1 14.29 7.64
 21 4 -1 28.03 15.27
 21 4 1 17.2 11.6
 21 4 1 10.63 10.05
 -21 4 1 16.25 10.95
 -21 4 1 15.8 11.8
 21 4 1 4.27 3.07
 -21 4 -1 9.14 2.86
 -21 -4 1 13.9 8.85
 21 4 -1 13.95 7.61
 -21 4 1 17.97 13.2
 -21 -4 1 11.24 9.18
 -21 4 -1 20.1 11.59
 21 4 -1 10.27 7.05
 -21 4 -1 25.51 13.03
 21 -4 1 2.41 2.85
 -21 4 1 7.58 3.44
 -21 -4 1 9.03 8.53
 21 4 1 3.83 11.11
 -21 -4 -1 17.58 8.35
 -21 4 -1 17.97 10.46
 -22 4 1 445.69 54.34
 -22 -4 -1 655.1 66.66
 -22 4 -1 353.3 51.29
 22 -4 -1 254.97 50.16
 22 4 1 359.48 70.53
 -22 -4 1 485.41 55.94
 -22 -4 1 479.41 58.71
 22 4 1 335.04 53.42
 -22 4 1 379.52 52.14
 22 4 -1 399.63 54.14
 -22 4 1 403.88 54.09
 -22 4 -1 370.26 54.42
 -22 -4 -1 423.22 54.16
 22 4 1 385.79 56.27
 -22 -4 -1 376.39 55.16
 22 -4 1 308.61 53.62
 22 4 -1 441.39 78.18
 -22 -4 -1 600.05 66.81
 22 -4 -1 378.43 61.99
 -22 4 -1 430.18 56.07
 22 4 -1 380.54 56.65
 -22 4 -1 366.2 55.51
 22 4 1 368.43 56.3
 22 4 -1 378.88 55.26
 22 4 -1 398.58 61.07
 22 4 1 413.63 59.8
 -22 -4 1 387.72 51.68
 -22 -4 -1 386.17 56.19
 22 4 1 342.75 56.87
 -22 -4 1 432.82 55.41
 -22 4 -1 440.09 55.57
 -22 4 1 323.95 45.74
 -22 4 -1 367.66 56.34
 23 4 1 8.14 10.9
 -23 4 1 -0.43 6.58
 -23 -4 -1 -0.2 7.59
 -23 4 -1 -3.68 9.43
 -23 -4 -1 -2.82 9.04
 23 4 1 -4.89 5.52
 -23 4 1 -5.73 8.47
 -23 -4 -1 -1.89 7.1
 23 4 -1 -11.98 10.51
 23 4 -1 -1.87 5.76
 -23 -4 1 -3.71 7.72
 -23 -4 1 13.35 8.96
 -23 -4 -1 -1.17 5.08
 23 4 -1 5.4 8.18
 -23 4 -1 -0.31 4.62
 23 4 1 6.8 9.95
 23 -4 -1 3.28 4.82
 23 4 1 6.17 9.18
 23 -4 -1 -9.02 15.89
 -23 4 1 1.59 2.96
 23 4 1 -4.47 6.02
 -23 -4 1 -7.38 10.99
 -23 4 1 5.31 2.2
 -23 -4 -1 0.93 5.07
 -23 4 -1 -1.93 2.28
 -23 -4 1 -2.86 5.38
 23 -4 1 -3.43 6.79
 23 4 -1 4.91 7.46
 -23 4 -1 4.47 9.45
 23 4 1 -18.32 16.29
 23 4 -1 -5.9 3.4
 -23 4 -1 5.95 3.62
 -24 -4 -1 27.76 14.59
 -24 -4 -1 19.96 12.74
 -24 4 -1 48.67 20.7
 24 -4 1 20.19 12.99
 24 4 1 50.85 20.43
 -24 -4 -1 34.12 14.98
 24 4 -1 19.62 11.47
 24 4 -1 15 7.83
 24 4 1 20.47 14.25
 24 4 1 4.64 7.59
 -24 4 -1 22.96 13.67
 24 -4 -1 8.74 9.06
 24 4 -1 24.87 16.69
 -24 -4 -1 35.3 17.94
 24 4 -1 14.01 11.43
 -24 -4 1 29.13 15.67
 24 4 1 40.91 16.14
 -24 -4 1 29.42 12.97
 24 4 -1 14.79 11.84
 24 4 1 27.36 10.89
 24 -4 -1 32.43 16.23
 -24 4 1 33 15.4
 -24 4 1 9.41 8.57
 -24 4 -1 36.17 18.59
 -24 4 1 28.65 16.04
 -24 4 -1 25.78 14.36
 24 4 1 24.41 16.62
 -24 -4 -1 29.73 14.8
 -24 -4 1 39.26 16.75
 -24 4 -1 44.69 18.58
 -24 -4 1 35.7 14.52
 -24 4 1 28.89 12.47
 25 4 1 12.02 10.6
 25 -4 -1 0.41 8.33
 -25 -4 1 13.66 10.63
 25 -4 1 3.36 9.8
 -25 -4 1 9.82 11.73
 -25 -4 -1 11.63 11.2
 25 4 -1 -4.5 6.88
 -25 -4 -1 10.83 3.29
 25 4 -1 10.25 7.92
 -25 4 -1 16.82 7.24
 -25 -4 1 14.86 10.91
 25 4 1 15.31 11.32
 25 4 1 -1.77 13.6
 -25 -4 1 28.11 15.65
 -25 4 -1 22.03 15.17
 -25 -4 -1 29.54 12.75
 25 4 1 8.19 5.98
 -25 4 1 19.54 11.66
 -25 -4 -1 12.88 8.71
 25 4 1 12.03 10.5
 25 4 -1 19.39 11.37
 -25 4 -1 8.63 7.98
 25 -4 -1 12.28 12.66
 -25 -4 -1 -9.05 10.53
 25 4 -1 8.9 8.05
 25 4 -1 10.6 5.49
 -25 4 1 8.28 2.24
 25 4 1 -7.11 10.71
 -25 4 -1 10.48 10.38
 -25 4 1 15.69 9.9
 -26 4 1 160.46 33.4
 26 -4 -1 80 24.54
 26 4 -1 46.74 17.58
 26 4 1 123.82 29.33
 -26 4 -1 129.19 30.06
 -26 -4 1 164.54 33.49
 -26 4 -1 124.81 30.22
 -26 4 1 147.58 30.64
 26 4 -1 98.94 27.63
 -26 -4 -1 134.8 30.24
 26 -4 -1 58.1 21.81
 26 4 -1 91.62 23.25
 -26 -4 -1 118.59 31.46
 26 4 1 83.05 24.84
 26 -4 1 67.3 21.78
 26 4 1 62.45 25.76
 26 -4 1 63.5 23.18
 26 4 -1 66.74 25.69
 26 4 -1 88.9 25.5
 -26 4 -1 174.88 35.83
 -26 -4 -1 236.93 40.27
 -26 -4 -1 150.57 30.92
 -26 4 -1 173.26 33.79
 -26 -4 1 133.17 30.04
 26 4 1 101.63 29.14
 -26 -4 1 138.16 30.29
 26 4 1 62.23 21.3
 -26 -4 -1 132.05 29.41
 -26 4 1 142.64 31.39
 -26 -4 1 139.69 32.94
 27 4 -1 6.33 7.15
 -27 -4 -1 7.37 3.84
 -27 -4 -1 -0.27 7.83
 -27 -4 -1 1.14 8
 -27 -4 1 1.03 3.05
 27 -4 1 -1.09 7.93
 27 -4 -1 14.07 12.25
 27 4 1 1.14 10.11
 -27 4 1 3.96 2.97
 -27 4 -1 9.13 10.18
 -27 -4 -1 9.32 10.8
 27 4 1 -5.02 11.46
 27 4 1 -6.74 9.88
 -27 4 1 2 2.82
 -27 4 -1 4.78 2.93
 -27 -4 1 -5.4 4.42
 27 -4 1 -2.93 3.75
 27 4 -1 -1.47 10.35
 27 4 -1 -0.76 2.9
 27 4 -1 2.36 8.75
 27 4 1 8.08 9.7
 -27 4 1 7.64 6.95
 -27 -4 1 -9.19 8.72
 27 -4 1 -7.36 8.54
 27 -4 -1 -2.53 5.32
 -27 -4 1 -3.68 7.38
 27 4 -1 0.6 6.83
 -27 4 1 17.19 13.24
 -27 4 -1 -0.24 10.86
 -27 4 -1 5.32 10.03
 28 -4 1 152.05 29.66
 28 4 -1 97.96 22.36
 28 4 -1 107.39 25.94
 28 -4 -1 112.5 26.67
 28 4 1 116.08 31.95
 -28 4 1 252.02 37.25
 28 4 1 172.67 34.88
 28 4 1 156.85 30.71
 -28 4 -1 239.13 39.17
 28 -4 -1 97.9 23.48
 -28 4 -1 283.49 41.41
 28 -4 1 118.88 27.63
 -28 4 -1 224.92 37.29
 -28 -4 -1 304.3 44.68
 -28 -4 1 270.46 40.87
 -28 4 -1 316.98 43
 -28 -4 1 280.66 44
 28 4 -1 180.85 33.29
 -28 -4 1 283.86 40.87
 -28 -4 -1 270.13 41.63
 -28 4 1 255.99 39.61
 28 4 -1 155.83 30.72
 28 -4 1 106.45 27.39
 -28 -4 1 231.2 37.65
 28 4 1 160.87 34.64
 28 4 -1 149.8 31.19
 -28 4 1 235.55 37.29
 -29 4 -1 -2.71 3.19
 -29 -4 1 -9.77 11.35
 29 -4 1 -1.82 6.22
 29 -4 1 11.97 9.03
 29 4 -1 -12.89 9.74
 -29 4 -1 2.35 4.92
 29 -4 -1 -1.11 7.63
 -29 4 1 7.32 7.55
 29 -4 1 10.11 4.43
 29 4 1 7.52 8.36
 -29 -4 1 1.33 3.31
 -29 4 1 3.29 5.74
 29 4 1 -3.82 4.81
 29 4 -1 -1.71 7.33
 29 4 -1 3.82 4.12
 -29 -4 1 -0.42 6.08
 29 4 -1 0.41 3.27
 29 4 1 3.42 8.26
 29 -4 -1 -9.38 11.46
 29 4 1 -7.71 7.13
 29 -4 -1 5.58 6.97
 29 4 -1 -3.51 10.53
 -29 4 -1 -10.45 6.39
 -29 4 -1 -11.92 9.05
 -29 -4 -1 1.45 5.75
 29 -4 -1 -12.87 7.01
 -29 -4 -1 -24.49 11.54
 -29 4 1 2.23 7.77
 -29 -4 1 1.14 3.74
 30 -4 -1 72.46 17.59
 -30 -4 -1 165.76 30.95
 30 4 -1 115.31 25.03
 -30 4 1 128.05 22.5
 30 4 -1 55.33 14.6
 30 4 1 67.94 17.4
 30 -4 -1 79.6 18.1
 30 4 1 101.76 24.61
 30 -4 1 69.63 17.17
 -30 -4 -1 159.47 28.69
 30 -4 -1 52.05 14.42
 30 4 -1 78.79 20.26
 30 -4 -1 46.31 15.04
 -30 4 -1 152.58 27.83
 -30 4 1 198.81 30.91
 30 4 1 92 24.49
 -30 -4 1 182.1 30.83
 30 -4 1 61.79 15.63
 30 4 1 59.16 16.5
 30 -4 1 65.76 15.57
 30 4 -1 73.42 18.24
 -30 -4 1 122.64 24.66
 -30 -4 1 147.99 26.28
 -31 4 -1 18.33 7.65
 31 -4 1 17.28 8.16
 31 -4 1 12.71 7.66
 31 -4 -1 -4.48 3.79
 31 4 -1 10.65 6.66
 31 -4 -1 0.45 3.98
 31 4 1 -0.41 4.79
 -31 -4 1 21.45 9.61
 31 4 1 9.78 6.6
 -31 -4 -1 9.17 2.14
 -31 4 1 28.6 11.37
 -31 -4 -1 8.3 5.44
 0 5 -1 0.26 4.79
 0 -5 1 -5.44 7.08
 0 5 -1 5.79 10.12
 0 5 1 9.83 11.19
 0 -5 -1 -0.94 2.36
 0 5 1 0.8 2.53
 0 -5 -1 -4.68 7.89
 0 5 1 1.69 3.02
 0 5 1 -3.69 5.11
 0 -5 1 0.65 2.14
 0 -5 -1 3.51 4.78
 0 5 -1 3.72 4.12
 1 5 1 76.12 22.76
 -1 -5 1 104.67 22.62
 1 -5 -1 101.97 24.51
 -1 -5 1 101.08 32.73
 -1 5 1 94.76 27.51
 -1 5 1 72.82 25.59
 1 -5 1 104.46 32.56
 1 -5 -1 92.2 24.09
 1 -5 1 95.1 20.91
 -1 -5 -1 74.08 21.58
 1 5 1 93.63 29.28
 -1 -5 -1 97.15 18.07
 -1 -5 -1 105.7 27.54
 -1 5 1 90.09 30.27
 1 5 -1 72.84 24.65
 -1 5 -1 88.87 27.51
 -1 5 -1 95.44 21.73
 -1 -5 -1 96.34 25.26
 1 5 -1 107.6 24.07
 1 5 -1 86.57 26.14
 1 5 1 73.03 25.48
 -1 5 1 101.12 23.94
 1 -5 -1 94.55 26.53
 -1 5 -1 72.15 25.79
 1 5 1 93.03 23.76
 2 5 1 -5.44 2.59
 -2 5 -1 -3.58 5.27
 -2 -5 1 1.95 2.9
 -2 5 1 3 1.27
 -2 5 -1 -2.28 8.43
 -2 5 -1 8.23 11.31
 2 -5 -1 1.03 7.24
 -2 -5 1 3.92 3.93
 -2 5 1 4.82 3.2
 2 -5 -1 2.7 4.57
 -2 -5 1 -0.99 8.18
 -2 5 1 -2.99 5.7
 -2 -5 -1 7.12 13.2
 -2 5 1 2.57 7.21
 2 5 -1 -0.15 5.31
 -2 5 -1 -0.25 4.71
 -2 5 1 -10.19 13.73
 2 5 -1 -0.11 8.6
 2 5 1 1.38 5.66
 2 5 -1 -1.72 9.69
 -2 -5 -1 4.38 9.95
 2 5 1 6.25 11.52
 2 5 1 1.55 3.23
 2 -5 -1 9.27 8.73
 -2 -5 -1 2.06 6.04
 2 -5 1 1.99 3.79
 -2 5 -1 0.81 7.42
 3 5 -1 157.83 34.23
 -3 5 1 162.17 30.2
 -3 -5 -1 151.2 33.22
 3 -5 -1 143.71 37.32
 -3 5 -1 149.4 36.12
 -3 -5 1 169.65 30.61
 -3 -5 -1 169.02 32.53
 3 -5 -1 130.74 34.98
 -3 5 1 141.72 38.55
 -3 5 -1 166.51 41.35
 3 5 -1 211.74 34.58
 3 5 1 165.31 40.13
 3 5 1 170.33 32.58
 -3 5 -1 150.72 39.61
 -3 -5 -1 147.35 33.05
 -3 5 -1 139.59 27.6
 -3 5 -1 99.69 31.99
 3 5 -1 155.64 35.4
 -3 5 1 153.32 29.37
 3 -5 -1 150.84 31.24
 -3 5 1 134.13 35.21
 3 5 1 161.34 34.97
 3 -5 1 157.92 37.67
 -3 5 1 149.31 36.01
 3 5 1 134.14 31.73
 -3 -5 1 134.1 37.19
 4 5 1 244.79 39.93
 -4 -5 -1 254.17 44.05
 -4 -5 1 264.5 51.42
 -4 5 1 164.12 40.61
 4 -5 -1 231.15 46.14
 4 -5 -1 217.8 48.27
 -4 5 1 261.06 39.54
 4 5 1 207.12 40.88
 -4 5 1 276.15 42.16
 4 5 1 263.07 43.89
 -4 5 -1 169.16 39.89
 -4 -5 1 251.59 38.84
 -4 -5 -1 189.49 40.51
 4 -5 1 229.76 44.11
 4 5 -1 221.02 42.39
 4 5 -1 286.8 41.87
 -4 5 -1 219.27 46.16
 4 -5 1 232.87 39.36
 -4 5 1 181.93 42.98
 4 -5 1 197.49 39.62
 -4 -5 -1 245.78 38.6
 -4 5 -1 192.06 44.98
 4 5 1 209.22 46.12
 -4 5 -1 227.75 49.9
 4 5 -1 256.24 41.04
 5 -5 1 23.46 15.01
 -5 5 -1 8.38 7.35
 5 -5 -1 12.32 14.96
 -5 5 1 14.83 8.79
 -5 5 -1 9.43 8.06
 -5 5 1 18.05 10.29
 -5 5 -1 11.32 12.5
 -5 -5 -1 9.51 9.23
 5 5 1 16.72 11.25
 -5 5 1 15.11 14.52
 -5 -5 -1 20.59 12.24
 -5 -5 1 16.58 10.51
 5 5 1 16.24 7.95
 5 5 -1 20.27 11.81
 -5 -5 -1 15.13 10.79
 5 5 -1 11.69 7.74
 5 5 -1 16.49 8.78
 -5 5 -1 19.65 16.49
 5 -5 -1 18.21 13.21
 -5 -5 1 11.92 15.7
 5 5 1 25.46 12.8
 5 5 1 8.57 7.38
 5 -5 1 14.78 8.09
 -6 -5 -1 457.33 65.34
 -6 5 1 373.9 64.46
 6 5 -1 502.88 57.26
 -6 5 1 474.23 59.69
 -6 -5 -1 403.72 59.75
 -6 -5 1 471.69 56.27
 6 5 1 473.64 70.61
 -6 5 1 368.81 61.61
 6 5 1 442.65 60.98
 -6 5 -1 393.14 66.13
 6 5 1 343.32 53.01
 6 5 1 500.71 59.34
 6 -5 -1 396 66.32
 -6 5 -1 394.08 64.67
 6 5 -1 494.16 58.81
 6 -5 -1 352.63 67.96
 -6 -5 1 485.7 69.04
 6 5 -1 415.95 59.06
 6 -5 1 445.42 53.94
 -6 5 -1 367.26 63.34
 -6 -5 -1 514.15 56.01
 6 -5 1 406.52 54.3
 -7 5 1 101.17 31.3
 -7 5 -1 103.51 35.44
 7 -5 1 119.53 33.71
 -7 5 1 113.4 29.72
 -7 -5 -1 110.09 34.69
 -7 -5 -1 139.33 29.94
 -7 -5 1 123.18 29.77
 -7 -5 1 125.35 34.35
 -7 5 1 106.71 34.62
 -7 5 -1 109.86 34.12
 7 5 1 107.51 22.42
 7 5 1 121.8 34.28
 7 5 -1 105.77 29.75
 7 -5 -1 97.19 39
 7 5 1 121.28 35.44
 7 -5 1 115.02 27.57
 7 -5 1 128.55 28.97
 7 5 -1 110.53 28.52
 -7 -5 -1 107.91 31.22
 7 5 1 98.82 30.46
 7 5 -1 163.9 33.14
 -8 -5 -1 515.08 73.95
 8 -5 -1 529.4 92.64
 -8 5 1 648.71 84.98
 8 5 -1 599.48 69.91
 -8 -5 1 697.78 84.5
 -8 5 -1 523.85 79.05
 -8 5 -1 623.62 86.57
 8 5 1 674.12 84.15
 8 5 1 419.42 63.28
 -8 -5 -1 721.03 67.79
 8 -5 1 670.95 67.18
 -8 -5 1 671.67 73.66
 8 -5 1 592.22 65.17
 -8 5 1 500.28 78.23
 -8 -5 -1 626.64 82.2
 8 5 1 535.51 58.36
 8 5 -1 830.15 73.69
 -8 5 1 605.36 72.25
 8 -5 1 564.87 73.48
 8 5 -1 658.04 76.82
 9 5 -1 19.66 11.76
 -9 5 1 16.81 6.69
 9 -5 -1 36.12 23.17
 -9 -5 -1 17.95 14.51
 9 5 1 15.95 8.86
 -9 -5 -1 21.05 8.18
 -9 5 -1 25.92 17.24
 9 -5 1 4.14 11.64
 -9 -5 -1 12.17 14.07
 -9 5 -1 19.73 13.01
 -9 5 1 25.78 19.47
 -9 -5 1 26.67 15.85
 9 5 1 20.3 15.8
 9 5 -1 23.62 13.46
 -9 -5 1 27.3 16.79
 9 5 1 18.22 9.78
 9 -5 1 17.93 8.9
 -9 -5 -1 26.84 15.27
 -9 5 1 23.93 15.14
 9 5 -1 26.8 13.44
 10 -5 1 160.48 45.45
 10 5 -1 202.28 44.6
 -10 5 1 226.83 47.17
 -10 5 -1 166.76 44.75
 10 5 1 192.8 39.36
 -10 -5 -1 207.55 50.46
 10 5 -1 222.37 44.79
 -10 5 1 230.24 53.98
 10 -5 -1 128.54 46.72
 -10 -5 1 227.38 50.25
 10 5 1 164.26 41.4
 -10 -5 -1 161.23 41.32
 -10 5 1 171.84 40.37
 -10 5 1 164.83 46.82
 -10 -5 1 264.69 49.31
 -10 5 -1 173.91 48.79
 -10 -5 -1 185.01 45.1
 11 5 1 68.14 28.76
 11 5 -1 85.48 28.42
 -11 -5 -1 84.22 31.09
 -11 5 1 74.21 32.92
 -11 -5 1 101.71 33.33
 -11 -5 -1 65.59 33.7
 11 5 1 73.48 27.52
 -11 5 1 64.89 28.9
 -11 -5 1 94.09 30.49
 -11 5 -1 73.2 33.61
 11 -5 1 48.45 26.51
 -11 5 1 46.52 20.29
 11 5 -1 105.15 34.01
 11 -5 -1 65.96 30.74
 -11 -5 -1 52.84 18.52
 -11 5 -1 67.06 29.67
 11 -5 1 67.71 29.34
 12 -5 -1 4.43 9.03
 -12 5 1 5.63 13.24
 12 5 1 5.42 5.33
 -12 5 -1 11.32 16.7
 -12 -5 -1 6.31 10.42
 -12 5 1 -10.46 13.79
 12 -5 1 1.56 13.05
 -12 5 -1 -8.88 9.25
 12 5 -1 2.03 6.1
 -12 -5 -1 6.46 8.26
 -12 -5 1 4.52 7.32
 -12 -5 1 -1.5 10.73
 12 5 1 22.39 18.1
 12 -5 1 0.11 9.17
 12 5 -1 4.85 4.71
 -12 -5 -1 3.15 9.76
 13 -5 -1 103.25 50.94
 -13 5 -1 78.66 33.26
 13 5 -1 105.34 36.7
 13 5 1 64.98 28.59
 -13 -5 -1 102.83 43.86
 -13 5 -1 68.5 30.14
 13 5 1 57.14 28.82
 -13 -5 -1 50.97 25.19
 -13 -5 1 108.19 32.67
 13 -5 1 113.83 42.16
 13 -5 1 53.26 29.48
 -13 -5 1 96.03 32.69
 -13 5 1 80.34 34.45
 -13 -5 -1 107.38 38.74
 13 5 -1 111.7 33.86
 -13 5 1 68.23 26.74
 -14 -5 -1 36.08 22.21
 14 -5 1 16.27 10.36
 -14 5 -1 32.77 22.66
 -14 5 -1 41.99 24.84
 14 -5 1 22.84 12.07
 14 5 1 27.29 16.79
 -14 -5 -1 22.9 24.98
 -14 -5 1 58.04 28.3
 -14 5 1 42.64 25.73
 14 5 -1 27.39 16.39
 -14 -5 1 22.46 14.85
 14 5 1 35.36 15.1
 -14 5 1 27.33 19.19
 14 -5 -1 13.29 18.09
 14 5 -1 46.8 20.42
 15 5 -1 -18.13 15.91
 15 5 1 79.09 33.99
 15 5 1 34.2 22.04
 -15 -5 1 65.96 26.45
 -15 5 -1 85 39.7
 -15 -5 1 88.05 34.91
 15 -5 -1 27.65 13.11
 -15 5 1 61.41 29.31
 -15 -5 -1 83.07 35.51
 -15 -5 1 71.95 29.72
 -15 5 1 24.4 8.06
 15 -5 1 67.51 34.98
 15 -5 1 35.63 25.42
 15 5 -1 105.02 39.83
 -15 5 -1 65.82 32.84
 -16 5 -1 19.41 10.21
 -16 5 -1 44.27 18.99
 -16 -5 1 49.39 17.72
 -16 5 1 23.58 13.8
 -16 5 -1 30.47 21.8
 16 5 1 6.91 12.82
 -16 5 1 37.41 13.27
 -16 -5 -1 33.89 15.2
 -16 5 -1 32.16 14.87
 -16 5 1 30.6 15.02
 16 -5 1 63.03 38.41
 16 5 1 41.56 19.19
 -16 -5 1 38.87 21.57
 16 5 -1 28.77 22.3
 -16 -5 1 28.12 16.4
 -16 5 -1 29.5 10.28
 -16 5 -1 32.97 27.66
 16 5 -1 38.19 16.64
 -16 -5 -1 25.36 21.19
 16 5 1 27.86 12.53
 -16 -5 1 38.4 11.9
 -16 -5 1 53.94 29.13
 -16 5 1 31.3 9.91
 -16 5 -1 30.92 14.95
 16 -5 1 35.75 30.84
 -16 5 -1 -1.27 6.93
 16 5 -1 36.39 13.76
 -16 5 1 -35.6 24.23
 -16 5 1 44.74 16.54
 16 5 1 26.58 12.59
 16 5 1 28.59 13.29
 16 -5 -1 -2.97 19.65
 16 5 -1 44.58 16.62
 -16 -5 -1 34.98 16.72
 -16 -5 1 28.17 11.71
 16 5 -1 57.45 30.17
 16 5 -1 52.15 23.47
 16 5 1 4.6 6.65
 17 5 -1 -4.92 10.49
 -17 5 1 -8.73 12.64
 -17 5 1 0.91 18.22
 17 5 1 10.25 11.38
 -17 -5 1 -4.09 10.92
 -17 5 -1 3.45 17.15
 -17 5 -1 0.84 3.13
 -17 5 1 -10.76 6.99
 17 5 1 9.84 8.89
 -17 5 -1 -7.99 1.73
 17 5 -1 -10.57 15.57
 -17 -5 1 10.59 9.8
 17 5 1 3.6 5.92
 -17 5 1 1.29 7.46
 17 5 -1 -6.36 7.69
 17 5 1 -10.98 8.69
 17 5 -1 5.46 4
 -17 5 -1 -1.78 2.12
 -17 -5 1 15.07 21.24
 17 5 -1 -11.78 8.15
 -17 -5 -1 -2.15 9.58
 -17 -5 1 16.46 10.22
 17 5 1 -5.44 9.62
 17 5 1 -2.31 12.29
 -17 5 -1 5.78 7.68
 -17 -5 -1 3.06 3.94
 -17 5 -1 -1.68 6.12
 17 -5 1 -4.22 16.69
 -17 -5 -1 0.26 4
 17 5 -1 5.22 16.06
 -17 -5 -1 0.18 4.6
 -17 5 1 4.13 2.38
 17 5 -1 -17.51 16.81
 17 5 -1 6.68 10.74
 -17 -5 1 -2.83 8.99
 -17 5 1 2.81 4.62
 17 5 -1 2.34 3.96
 -17 5 -1 1.79 6.09
 -17 5 -1 -8.24 10.19
 -17 5 1 3.36 2.86
 17 -5 -1 4.09 10.3
 17 -5 1 13.18 10.45
 -17 5 -1 -3.39 6.43
 -17 -5 1 2.91 6.21
 -17 -5 -1 15.77 8.9
 18 -5 1 79.77 41.23
 -18 -5 -1 153.95 30.14
 -18 -5 1 124.53 26.23
 -18 -5 -1 94.02 24.24
 18 5 1 74.01 17.68
 -18 5 -1 72.25 22.08
 18 5 -1 131.55 31.52
 18 5 -1 93.03 25.82
 18 5 1 89.35 23.33
 -18 5 1 118.94 34.79
 -18 -5 1 121.03 25.29
 -18 -5 1 137.01 29.38
 18 5 -1 103.53 25.48
 -18 -5 -1 134.14 29.79
 18 5 -1 119.5 27.95
 -18 5 -1 117.02 31.56
 -18 -5 -1 60.91 20.24
 -18 5 1 79.09 20.3
 18 5 1 102.75 27.31
 -18 5 -1 104.73 26.52
 18 5 1 100.58 35
 18 5 -1 141.74 34.46
 18 5 1 64.1 22.86
 -18 5 1 122.28 29.6
 -18 5 -1 114.22 47.83
 -18 5 -1 91.48 23.3
 -18 5 -1 97.71 28.33
 -18 5 1 100.9 25.06
 -18 5 1 105.97 26.31
 18 5 -1 108.87 26.59
 -18 -5 -1 119.66 29.23
 -18 -5 1 108.9 26.08
 18 5 -1 185.29 47.11
 -18 5 -1 28.86 19.87
 -18 5 1 103.31 25.94
 -18 5 -1 97.97 26.11
 19 5 1 32.91 15.68
 19 5 1 40.65 17.19
 -19 -5 1 59.02 18.43
 -19 5 1 47.48 16.25
 -19 5 1 65.01 21.54
 19 5 1 36.78 18.54
 19 5 -1 38.57 17.45
 -19 5 -1 26.96 14.66
 -19 5 -1 46.86 17.72
 -19 5 1 30.41 12.92
 -19 -5 1 47.98 16.45
 19 5 -1 38.4 16.73
 19 5 -1 41.8 16.47
 -19 -5 -1 53.54 16.6
 -19 5 1 59.67 25.84
 -19 -5 -1 49.02 19.14
 -19 -5 -1 68.96 20.75
 -19 -5 -1 42.75 16.44
 -19 5 -1 59.35 19.5
 19 5 -1 48.44 20.13
 -19 5 -1 41.42 20.34
 -19 -5 1 47.66 15.1
 -19 5 1 26.2 11.02
 -19 5 -1 42.93 17.43
 19 5 -1 46.49 20.19
 19 5 1 31.36 17.31
 -19 5 1 46.9 17.94
 -19 5 -1 40.51 16.36
 19 5 -1 56.08 25.17
 -19 -5 -1 48.05 18.13
 19 5 1 39.57 17.35
 -19 -5 1 42.72 15.5
 -20 5 -1 350.94 52.66
 -20 5 -1 374.61 52.82
 20 5 -1 474.92 66.72
 -20 -5 1 467.99 53.11
 -20 5 -1 366.69 51.79
 -20 -5 -1 392.22 54.19
 20 5 -1 366.2 52.47
 -20 -5 1 358.61 50.13
 20 5 1 312.69 51.91
 20 5 1 307.18 49.37
 -20 5 -1 397.87 51.54
 20 5 -1 390.86 51.2
 20 5 -1 393.46 56.86
 -20 -5 1 528.83 60.62
 -20 -5 -1 520.88 57.44
 -20 5 1 328.89 48.73
 20 5 -1 472.57 75.9
 -20 5 -1 369.51 55.61
 -20 5 1 583.35 77.78
 -20 -5 1 402.64 49.89
 -20 -5 -1 296.54 47.28
 -20 5 1 288.68 43.1
 -20 5 -1 375.54 60.74
 -20 5 1 358.94 48.18
 -20 -5 -1 395.74 51.65
 20 5 1 280.38 50.13
 -20 5 1 385.42 53.35
 20 5 1 335.75 67.12
 20 5 -1 329.04 49.15
 20 5 1 339.2 51.91
 -20 -5 -1 515.05 60.75
 -21 5 -1 -6.95 4.98
 21 5 -1 12.2 10.43
 -21 -5 -1 9.78 8.73
 -21 -5 -1 12.73 9.71
 -21 -5 1 -0.99 4.35
 -21 5 1 3.07 7.6
 -21 5 1 -4.08 9
 -21 5 -1 -1.51 4.03
 21 -5 -1 -2.77 14.84
 21 5 -1 -4.51 4.12
 21 5 -1 -2.33 6.2
 21 5 1 1 7.2
 -21 -5 -1 6.93 8.16
 21 5 1 1.14 9.65
 -21 5 -1 -9.83 12.18
 -21 -5 -1 16.06 10.87
 21 5 -1 14.51 11.77
 21 5 -1 2.55 5.12
 21 5 1 0.84 6.75
 -21 5 -1 1.41 6.95
 -21 5 -1 4.44 6.18
 -21 5 1 14.35 10.91
 -21 -5 1 -1.45 6.86
 -21 5 1 -4.85 8.38
 -21 -5 1 13.94 9.78
 -21 -5 1 -1.32 2.59
 21 5 1 12.48 12.87
 21 5 -1 -2.98 10.01
 21 5 1 0.8 4.22
 -21 -5 -1 7.51 8.46
 -22 -5 -1 194.25 35.87
 22 5 -1 118.9 28.54
 -22 5 -1 124.73 30.94
 -22 5 -1 188.66 36.39
 -22 -5 -1 134.43 31.88
 -22 5 1 137.8 32.69
 22 5 1 128.73 34.63
 -22 -5 -1 104.06 26.5
 -22 5 -1 122.3 30.8
 -22 5 -1 120.16 31.47
 22 5 -1 166.14 46.58
 -22 -5 -1 130.22 30.43
 22 -5 -1 100.99 28.58
 22 5 -1 107.37 29.61
 -22 5 -1 166 35.07
 22 5 -1 121.31 33.21
 -22 5 -1 99.43 29.57
 22 5 1 100.73 30.08
 -22 -5 1 156.55 33.34
 -22 -5 1 126.8 29.61
 22 5 1 110 28.47
 22 5 1 81.35 31.46
 -22 5 1 118.18 28.93
 22 -5 -1 76.17 25.32
 22 -5 1 88.36 26.7
 -22 -5 1 151.59 30.42
 22 5 -1 78.6 24.56
 -22 5 1 137.05 30.28
 -22 -5 1 187.37 36.74
 22 5 1 101.06 26.86
 -23 5 -1 12.9 10.62
 23 5 -1 14.15 14.14
 23 5 -1 -0.49 3.19
 23 -5 -1 -2.27 7.88
 23 5 1 -5.67 8.33
 -23 -5 -1 -8.74 10.64
 -23 5 -1 0.09 3.23
 -23 -5 1 3.33 5.67
 -23 5 1 2.49 4.71
 23 5 -1 -1.65 7.15
 23 5 1 11.36 10.73
 -23 -5 1 -1.26 3.9
 23 5 -1 7.25 6.18
 -23 -5 1 0.68 5.91
 -23 5 1 2.86 5.95
 23 5 1 -5.7 5.9
 23 5 1 -2.36 9.61
 -23 -5 -1 6.35 9.81
 -23 -5 -1 0.32 9.15
 -23 5 1 1.76 5.58
 23 5 -1 -3.24 8.2
 23 -5 1 14.46 3.94
 -23 5 -1 16.75 15.99
 -23 5 -1 6.33 5.75
 -23 -5 1 11.06 6.77
 23 -5 -1 16.66 14.5
 23 5 1 -2.37 7.32
 -23 -5 1 3.04 5.85
 -23 -5 -1 14.09 12.34
 -23 5 -1 4.11 4.73
 -24 -5 1 8.46 8.79
 24 5 -1 0.54 7.76
 -24 5 -1 12.81 13.29
 -24 -5 -1 9.72 10.83
 24 5 -1 0.95 7.73
 -24 -5 -1 26.67 14.54
 24 5 1 1.5 7.74
 -24 -5 1 -1.4 7.3
 -24 5 1 3.56 7.8
 -24 5 -1 2.94 4.74
 -24 5 -1 3.98 5.7
 -24 -5 1 2.12 1.91
 -24 5 1 4.21 5.61
 24 -5 1 3.81 8.38
 24 5 -1 -4.74 12.85
 24 5 1 1.04 4.58
 24 -5 -1 -4.65 8.27
 24 5 1 0.13 5.74
 24 5 -1 11.55 10.37
 -24 5 -1 2.4 6.82
 -24 5 1 -1.11 8.69
 24 -5 -1 -2.18 6.55
 24 5 1 -0.17 5.45
 24 5 -1 5.62 11.06
 -24 -5 -1 4.86 6.16
 -24 -5 1 -2.27 8.78
 -24 -5 -1 6.11 8.42
 24 5 1 2.01 3.89
 -25 -5 -1 -10.61 11.61
 -25 -5 -1 3.56 7.99
 -25 5 1 -5.66 9.54
 25 -5 -1 -5.09 12.4
 -25 -5 1 0.06 1.89
 25 -5 -1 10.56 9
 25 5 -1 -6.95 12.79
 -25 5 1 -5.65 7.41
 25 5 1 -21.96 12.96
 25 -5 1 26.49 15.15
 25 5 -1 -1.9 3.06
 25 5 1 0.1 12.55
 -25 5 1 -4.3 5.45
 -25 -5 -1 1.72 7.28
 25 5 1 -1.75 6.22
 25 5 -1 0.1 7.29
 -25 -5 1 -1.37 6.47
 25 5 -1 2.21 6.63
 -25 5 -1 1.06 7.59
 -25 5 -1 0.53 6.48
 -25 5 1 6.57 5.56
 25 5 1 2.98 5.91
 -25 5 -1 -0.79 4.95
 -25 -5 -1 2.25 4.74
 -25 -5 1 -5.82 10.22
 25 5 -1 6.14 8.14
 -25 -5 1 -0.31 7.23
 25 5 1 -9.67 13.22
 26 5 -1 12.34 12.96
 -26 5 1 6.93 3.07
 26 5 1 1.47 10.16
 26 5 -1 -4.3 9.26
 -26 5 1 8.87 8.53
 -26 5 1 1.77 5.19
 -26 5 -1 3.91 4.25
 26 -5 1 1.55 7.39
 26 -5 -1 -5.47 7.1
 -26 -5 -1 -5.01 5.78
 -26 5 -1 4.58 2.22
 -26 5 1 -4.91 11.46
 -26 -5 -1 2.02 5.46
 26 5 1 -1.73 6.41
 26 5 -1 15.38 13.02
 -26 -5 1 2.51 6.85
 -26 -5 1 -5.23 6.61
 -26 -5 1 -4.72 7.39
 26 5 -1 -5.55 8.87
 -26 -5 1 3.1 8.81
 -26 -5 -1 0.64 4.23
 26 5 -1 -10.34 11.32
 -26 5 -1 -0.64 11.48
 26 -5 1 -3.7 9.69
 26 5 1 -8.03 9.25
 26 5 1 8.53 7.39
 26 -5 -1 -6.42 8.4
 26 5 1 26.64 18.71
 -27 5 1 37.42 14.49
 27 5 -1 32.64 13.9
 27 -5 -1 24.69 12.41
 -27 -5 -1 37.86 16.02
 -27 5 1 44.12 16.44
 27 -5 1 36.35 15.53
 -27 -5 -1 49.52 18.81
 -27 5 1 62.11 22.22
 27 5 1 21.27 8.11
 27 5 -1 18.61 13.48
 27 5 1 45.15 15.69
 -27 -5 1 51.81 19.13
 27 5 -1 23.8 13.97
 -27 5 -1 57.23 20.37
 27 -5 1 1.96 7.94
 -27 5 -1 63.79 20.05
 27 5 1 8.76 8.36
 27 5 -1 23.03 11.86
 -27 5 1 31.02 12.11
 27 -5 -1 12.07 5.79
 27 5 1 32.26 15.32
 -27 -5 1 45.9 16.29
 27 -5 1 9.21 3.19
 -27 -5 1 58.66 19.96
 27 5 -1 44.59 15.28
 -27 -5 -1 35.95 13.8
 -27 5 -1 44.86 15.01
 -27 -5 1 25.63 11.96
 -28 5 1 20.03 12.2
 28 5 -1 6.07 5.53
 28 -5 -1 -8.54 6.92
 28 -5 1 14.55 9.75
 28 5 -1 -1.78 5.74
 28 5 1 10.37 8.57
 -28 5 1 17.18 10.02
 -28 -5 -1 12.01 6.77
 28 -5 1 7.17 8.07
 28 5 1 -2.6 7.51
 -28 -5 1 9.54 9.52
 28 -5 1 -5.6 7.41
 28 5 -1 -6.67 8.63
 -28 5 -1 -2.94 8.04
 -28 -5 1 10.23 6.69
 28 5 1 -3.71 5.91
 -28 5 -1 11.96 2.54
 28 -5 -1 10.87 8.96
 -28 -5 -1 1.34 2.43
 -28 -5 1 5.23 7.86
 28 5 -1 -8.24 13.75
 28 5 -1 2.24 12.37
 -28 -5 1 12.61 9.52
 -29 -5 1 -4.38 10.82
 29 5 -1 -28.02 15.42
 -29 -5 1 7.65 6.17
 -29 -5 -1 3.74 3.66
 -29 -5 1 13.59 8.59
 29 -5 -1 -2.78 2.84
 29 -5 1 -3.36 5.26
 29 5 1 11.43 5.42
 29 5 -1 -5.4 4.85
 29 5 1 -14.54 15.4
 29 -5 -1 11.25 8.15
 -29 -5 1 -7.59 8.16
 29 -5 -1 11.62 9.3
 -29 -5 -1 3.22 3.11
 29 5 -1 8.99 7.88
 29 5 1 -0.17 6.97
 29 5 -1 -0.57 7.81
 -29 5 1 10.03 8.47
 -29 5 -1 2.75 5.58
 -29 5 1 -2.49 9.06
 29 -5 1 0.47 3.94
 -30 -5 -1 94.39 21.1
 -30 5 -1 106.7 21.7
 -30 -5 1 102.64 21.88
 30 5 -1 52.47 16.01
 30 -5 1 50.17 15.06
 30 5 -1 17.05 8.96
 30 5 1 27.92 12.32
 30 -5 -1 27.76 11.46
 30 5 1 30.67 12.17
 -30 -5 -1 79.75 20.61
 -30 -5 1 103.17 23.69
 30 5 1 56.5 17.04
 30 -5 -1 19.84 7.79
 30 5 -1 37.35 10.91
 30 -5 1 38.55 13.3
 -30 5 1 136.14 24.55
 30 -5 -1 46.79 14.15
 -30 -5 1 86.6 21.06
 0 -6 -1 6.48 3.51
 0 6 1 1.32 8.54
 0 6 -1 2.91 4.12
 0 -6 1 -0.17 11.07
 0 -6 -1 -0.79 3.24
 0 -6 1 -0.67 2.75
 0 6 -1 -2.33 9.77
 0 6 -1 9 5.28
 0 6 1 -0.99 4.5
 0 -6 -1 1.86 4.58
 0 6 1 4.25 3.22
 0 6 1 -0.81 4.3
 -1 6 1 21.29 16.15
 1 6 -1 6.81 5.08
 -1 -6 1 13.33 7.61
 1 -6 -1 11.88 6.94
 1 -6 1 20.15 10.75
 1 6 1 11.01 12.72
 -1 6 1 11.36 12.61
 -1 -6 -1 10.16 7.97
 1 6 -1 7.72 5.01
 1 6 1 13.2 7.91
 1 -6 -1 13.2 9.08
 -1 -6 -1 18.36 13.52
 -1 6 -1 7.76 8.29
 1 -6 -1 24.15 11.54
 -1 6 -1 13.43 13.01
 1 6 1 12.75 13.71
 -1 6 -1 24.12 11.93
 1 6 1 5.18 7.28
 -1 -6 -1 17.91 11.83
 -1 6 1 4.08 3.96
 1 6 -1 20.21 13.09
 -1 -6 1 14.08 14.41
 -1 6 1 14.09 10.89
 1 -6 1 33.42 21.43
 2 -6 -1 308.77 51.13
 2 6 -1 297.78 51.26
 -2 -6 -1 304.14 48.38
 -2 -6 -1 293.05 48.47
 2 -6 -1 312.02 55.66
 -2 6 -1 312.68 57.91
 -2 6 -1 215.09 47.43
 2 6 -1 343.56 48.42
 -2 6 1 227.07 52.06
 2 -6 1 257.63 53.4
 -2 -6 1 318.24 45.27
 -2 6 1 218.63 48.19
 -2 -6 1 258.68 56.53
 2 6 1 340.54 50.93
 -2 6 1 329.28 49.66
 2 6 -1 265.71 50.29
 2 6 1 260.47 50.43
 2 6 1 226.84 45.28
 2 -6 1 344.89 47.46
 -2 6 1 277 51.56
 -2 6 -1 292.84 42.2
 2 -6 -1 295.17 53.52
 2 6 1 264.84 57.09
 -2 -6 -1 256.65 49.62
 -3 6 -1 75.6 28.3
 3 -6 -1 77.62 23.28
 -3 6 -1 43.63 26.18
 3 6 1 64.45 23.23
 3 6 1 82.98 26.91
 -3 -6 1 67.52 20.3
 3 -6 -1 61.41 24.67
 -3 -6 -1 82.38 29.28
 3 6 -1 72.09 25.23
 -3 -6 -1 103.5 26.43
 3 6 -1 62.17 24.71
 3 6 1 86.67 25.69
 3 -6 -1 61.83 23.79
 -3 6 -1 90.64 31.19
 3 -6 1 61.59 24.14
 3 6 1 65.51 27.18
 -3 6 1 52.24 25
 -3 6 1 75.62 23.78
 -3 6 1 64.15 27.48
 -3 6 -1 73.33 20.8
 -3 -6 1 73.75 29.6
 -3 6 1 73.6 26.93
 -3 -6 -1 72.58 24.01
 3 6 -1 108.8 28.51
 4 6 -1 33.01 19.49
 -4 -6 -1 37.13 17.8
 -4 6 1 28.45 18.71
 4 6 -1 40.39 16.7
 4 -6 -1 40.52 18.9
 4 6 1 28.44 17.91
 4 6 1 28.13 16.5
 4 -6 -1 33.12 19.57
 4 -6 1 26.98 14.09
 -4 6 1 29.81 16.69
 -4 -6 -1 55.93 19.56
 -4 6 1 29.5 15.67
 -4 -6 -1 42.43 18.92
 4 6 -1 43.75 18.35
 4 6 1 33.74 21.09
 -4 6 -1 24.9 16.76
 -4 6 -1 25.09 13.16
 4 6 1 40.4 18.52
 -4 -6 1 17.63 14.39
 -4 6 -1 52.34 25.44
 4 -6 1 41.23 20.58
 -4 -6 1 43.37 15.1
 4 -6 -1 30.18 13.68
 4 -6 1 41.18 19.09
 -4 6 1 33.02 20.12
 -4 6 -1 13.66 14.54
 5 6 -1 -2.62 7.27
 5 6 -1 3.29 13.49
 -5 6 1 7.4 6.83
 -5 -6 -1 9.84 14.41
 -5 6 1 -2.27 5.71
 -5 -6 -1 5.44 11.49
 -5 -6 1 5.32 9.83
 5 6 1 -4.81 18.5
 5 -6 -1 -4.51 13.72
 5 -6 1 8.93 7.91
 -5 -6 1 -7.74 10.14
 5 -6 1 -12.24 11.35
 -5 6 1 0.18 4.89
 5 6 1 21.6 13.9
 5 -6 1 -16.18 10.65
 -5 -6 -1 -1.73 10.78
 5 6 -1 4.94 9.28
 -5 6 -1 9.67 3.89
 5 6 1 4.64 11.52
 5 -6 -1 0.29 13.04
 5 -6 -1 -22.03 13.43
 -5 6 1 -20.62 12.69
 -5 6 -1 -0.52 7.59
 5 6 1 -1.17 5.58
 -5 6 -1 -3.89 11.16
 6 -6 1 120.94 32.3
 -6 6 -1 130.85 41.78
 6 -6 -1 118.15 41.67
 6 -6 -1 96.47 34.86
 6 6 -1 155.26 37.12
 -6 -6 1 131.11 32.58
 -6 -6 -1 169.14 34.17
 -6 6 1 153.76 37.04
 -6 6 -1 91.94 33.03
 -6 -6 -1 144.54 37.89
 6 -6 1 90.81 29.63
 -6 6 1 102.76 36.32
 -6 -6 -1 114.54 34.65
 -6 6 -1 129.76 41.5
 -6 6 1 114.65 39.32
 -6 -6 1 144.2 41.74
 6 6 1 132.77 39.87
 6 6 1 179.59 40.97
 6 6 1 92.29 28.7
 6 6 -1 118.71 34.93
 6 6 -1 149.19 37.32
 6 -6 1 170.65 34.55
 6 -6 1 146.86 36.15
 7 6 1 27.5 14.74
 -7 -6 1 41.67 24.53
 7 -6 -1 33.69 20.78
 -7 -6 -1 68.08 22.01
 7 -6 1 49.19 17.76
 -7 -6 1 33.71 16.51
 7 -6 1 43.98 24.1
 -7 -6 -1 29.94 18.87
 -7 6 -1 60.33 29.3
 7 6 -1 63.92 23.88
 -7 6 1 41 19.35
 7 6 1 47.94 22.07
 -7 6 1 34.51 21.93
 -7 6 1 39.18 21.2
 -7 -6 -1 39.28 15.11
 7 6 -1 51.04 23.48
 -7 6 -1 48.67 23.42
 7 6 1 53.17 23.01
 7 6 -1 41.82 17.86
 7 -6 -1 38.63 23.71
 -8 6 -1 22.13 19.64
 -8 -6 -1 19.83 9.28
 8 -6 -1 28.64 21.01
 -8 6 1 6.13 11.72
 -8 6 1 20.37 20.28
 -8 6 -1 19.62 16.61
 8 6 -1 26.67 16.33
 8 -6 -1 12.02 16.14
 -8 6 1 22.63 17.12
 8 -6 1 20.62 11.94
 -8 -6 -1 31.32 23.06
 8 6 1 22.35 15.76
 -8 -6 1 24.75 12.39
 -8 -6 1 25.28 18.73
 8 -6 1 16.72 14.23
 8 6 1 22.97 17.01
 8 6 1 -0.64 9.93
 8 6 -1 27.61 16.92
 8 6 -1 21.85 16.32
 9 -6 1 3.85 8.75
 -9 6 1 -4.43 7.01
 -9 -6 -1 -0.31 6.47
 -9 -6 1 8.4 8.65
 9 6 1 -0.47 10.05
 9 -6 -1 -2.51 15.12
 9 6 -1 8.95 8.76
 -9 6 1 12.53 17.11
 9 6 -1 1.81 10.67
 -9 6 -1 -6.44 8.47
 -9 -6 -1 0.14 12.57
 9 -6 -1 -1.7 6.25
 -9 -6 1 -3.25 13.92
 -9 6 1 -7.78 14.87
 -9 -6 -1 3.12 8.84
 9 6 1 9.85 12.11
 -9 6 -1 16.24 19.94
 -10 6 1 166.7 51.78
 -10 -6 1 220.16 54.14
 -10 6 1 149 41.64
 -10 6 -1 132.72 44.45
 -10 -6 -1 151.86 45.48
 -10 6 1 165.8 47.05
 10 -6 -1 174.75 60.25
 -10 -6 -1 167.87 47.14
 10 6 1 212.31 54.26
 10 6 -1 224.34 49.69
 -10 6 -1 211.14 57.03
 10 -6 1 177.34 47.7
 10 6 1 143.96 41.33
 10 -6 -1 222.08 61.97
 -10 -6 -1 87.52 29.28
 -10 -6 1 199.37 46.01
 10 6 -1 213.74 48.79
 -11 -6 1 84.32 31.49
 11 6 -1 44.82 19.55
 11 6 1 47.44 23.84
 -11 6 -1 31.95 22.05
 11 -6 1 41.39 27.1
 -11 -6 1 38.24 21.33
 11 -6 -1 28.78 6.38
 11 6 -1 74.63 30.93
 11 6 1 65.1 31.1
 -11 6 1 78.98 34.58
 -11 -6 -1 14.09 11.65
 -11 6 1 62.57 31
 -11 -6 -1 48.35 25.23
 -11 -6 -1 42.71 20.39
 -11 6 -1 42.47 29.32
 11 -6 1 51.2 25.71
 -11 6 1 31.81 16.74
 12 6 -1 107.89 36.65
 -12 -6 -1 77.55 29.94
 12 -6 -1 89.5 46.77
 12 -6 1 26.08 16.36
 -12 6 1 83.45 32.42
 12 -6 1 85.75 40.6
 -12 6 -1 46.62 24.27
 -12 -6 1 108.1 35.14
 12 6 1 63.36 27.16
 12 6 1 93.63 35.76
 -12 -6 -1 64.96 27.17
 -12 6 1 97.77 37.92
 -12 6 -1 95.31 40.21
 -12 -6 1 109.91 39.6
 -12 -6 -1 67.75 32.5
 12 6 -1 125.21 38.98
 13 6 1 -1.89 9.03
 -13 6 1 30.52 20.84
 -13 -6 -1 3.48 12.2
 13 6 1 -4.62 19.66
 -13 -6 -1 0.69 15.63
 -13 -6 1 7.5 11.31
 -13 6 -1 11.5 14.14
 13 -6 1 -7.49 11.12
 -13 6 1 9.37 18.31
 13 -6 1 -32.4 25.3
 -13 -6 1 -2.35 9.87
 13 -6 -1 -8.23 17.35
 13 6 -1 -5.65 12.71
 -13 -6 -1 6.92 12.04
 -13 6 -1 27.71 22.36
 13 6 -1 3.15 14.23
 14 -6 1 73.99 32.36
 -14 -6 -1 39.94 26.31
 -14 6 1 66.29 32.1
 -14 -6 1 144.98 43.2
 14 -6 1 67.03 33.01
 -14 6 -1 15.8 11.14
 -14 -6 -1 77.68 35.51
 -14 -6 1 113.8 40.09
 14 6 1 72.74 34.49
 -14 6 -1 96.61 38.39
 14 6 -1 144.18 44.21
 14 6 1 101.65 41.69
 -14 6 1 72.65 27.75
 -14 6 -1 98.77 39.2
 14 -6 -1 42.82 34.85
 14 6 -1 153.77 46.25
 15 6 1 12.41 10.97
 15 6 -1 -28.12 20.56
 15 6 -1 26.85 12.73
 15 6 1 7.64 2.97
 15 -6 1 -10.86 25.39
 15 6 1 29.22 27.05
 15 6 1 -0.68 7.17
 15 -6 -1 -2.98 11.38
 -15 6 1 16.74 14.76
 -15 -6 1 67.8 30.3
 -15 6 -1 23.08 13.04
 15 6 1 9.1 3.65
 15 6 1 -1.08 6.09
 -15 6 -1 6.66 6.14
 15 6 -1 27.38 11.96
 15 6 1 9 9.22
 15 6 -1 32.74 14.85
 15 6 -1 20.09 15.82
 -15 -6 -1 7.17 19.73
 15 -6 1 27.1 27.24
 -15 6 -1 17.86 11.62
 -15 6 1 26.7 16.39
 -15 6 -1 17.32 9.36
 15 6 1 5.84 12.91
 -15 6 -1 16.55 20.1
 -15 -6 1 33.37 12.83
 -15 -6 1 7.59 5.39
 -15 6 1 12.21 9.19
 15 6 -1 26.68 17.79
 15 6 -1 16.06 9.07
 -15 6 1 35.38 18.96
 -15 6 1 13.92 9.64
 -15 6 1 11.21 11.89
 15 6 -1 20.43 18.06
 -15 -6 -1 18.37 10.16
 -15 -6 -1 5.71 5.51
 -15 6 -1 8.34 8.57
 -15 -6 1 27.07 17.19
 -15 6 -1 1.69 7.17
 -15 6 1 10.34 2.72
 -15 6 -1 14.56 14.63
 -16 6 1 -1.39 5.3
 16 6 -1 25.18 9.56
 -16 6 -1 18.84 11.66
 -16 6 -1 25.62 15.17
 16 -6 -1 22.95 29.38
 -16 -6 1 27.54 12.11
 -16 6 -1 11.57 4
 16 6 1 14.42 6.28
 -16 -6 1 33.5 13.95
 16 6 1 -1.89 17.04
 -16 6 -1 24.3 12.51
 16 6 1 3.52 2.35
 16 6 -1 29.09 13.94
 16 6 -1 25.23 11.59
 -16 -6 -1 40.64 31.33
 16 6 1 2.89 11.05
 -16 6 1 12.04 3.24
 16 6 -1 38.34 19.46
 -16 -6 1 53.14 31.1
 -16 6 1 13.58 7.89
 -16 6 1 24.42 13.05
 -16 -6 1 18.16 14.62
 16 6 -1 24.37 21.87
 -16 -6 1 3.74 10.27
 16 6 -1 11.47 7.17
 -16 6 -1 21.11 19.97
 -16 6 1 24.24 11.19
 16 6 -1 23.66 13.22
 -16 -6 -1 1.84 8.02
 16 6 1 7.67 9
 16 6 1 7.92 4.11
 16 6 1 25.88 15.78
 -16 6 1 24.07 14.12
 16 6 -1 29.11 14.8
 16 -6 -1 21.51 27.52
 -16 -6 -1 20.64 11.67
 -16 -6 -1 14.06 8.95
 16 -6 1 21.91 21.14
 -16 6 -1 13.05 4.58
 16 -6 1 17.64 33.33
 -16 -6 1 14.64 9.96
 17 -6 1 -0.16 2.57
 -17 6 1 17.37 10.17
 17 6 -1 26.76 13.32
 17 6 1 13.47 8.36
 -17 6 -1 28.85 21.58
 17 6 1 22.72 16.8
 -17 -6 1 23.02 13.77
 17 6 -1 15.63 9.09
 -17 -6 -1 21.36 10.99
 -17 -6 -1 25.03 13.38
 -17 -6 1 23.95 11.95
 17 6 -1 10.04 9.13
 -17 -6 -1 39.58 14.57
 -17 -6 1 7.53 14.08
 17 6 -1 45.08 21.11
 -17 6 -1 7.64 3.63
 -17 -6 1 15.84 8.83
 17 6 -1 23.85 12.19
 17 6 1 27.03 9.42
 -17 6 -1 58.1 33.69
 -17 6 -1 29.87 16.52
 17 6 1 21.28 14.88
 -17 6 -1 14.8 7.8
 -17 6 -1 21.05 11.69
 17 6 1 25.23 13.45
 17 6 -1 4.39 8.78
 -17 6 1 33.12 16.3
 -17 6 1 20.14 10.73
 -17 -6 1 16.59 10.56
 17 6 -1 16.62 11.63
 -17 6 1 31.15 15.63
 -17 6 1 25.03 7.71
 17 6 1 34.64 21.46
 -18 6 -1 335.48 48.63
 18 6 -1 404.18 49.6
 18 6 -1 359.33 51.13
 18 6 -1 495.98 74.55
 -18 6 1 470.83 70.88
 -18 6 -1 310.47 53.99
 18 6 1 394.8 70.11
 -18 6 -1 338.81 48.73
 18 6 -1 485.4 63.88
 -18 -6 1 376.35 50.1
 -18 -6 -1 485.05 54.76
 -18 -6 -1 348.36 50.48
 18 6 1 315.82 48.94
 -18 6 1 358.21 50.12
 -18 6 1 368.18 49.09
 -18 -6 1 468.69 55.15
 18 6 -1 432.81 58.13
 -18 6 1 357.3 49.4
 -18 6 -1 289.72 46.76
 -18 6 -1 347.74 60.86
 -18 -6 -1 377.96 49.63
 -18 6 1 353.56 51.15
 -18 -6 1 467.19 51.62
 18 6 -1 445.99 57.93
 18 6 1 310.8 50.1
 -18 -6 1 398.77 50.58
 18 6 1 380.73 53.35
 18 6 1 300.48 54.7
 18 6 -1 440.17 54.29
 18 6 1 377.05 57.09
 -19 -6 1 75.04 21.96
 19 6 -1 45.97 18.07
 -19 -6 -1 61.45 20.74
 19 6 -1 81.41 22.79
 -19 -6 -1 61.94 20.48
 19 6 -1 79.48 24.73
 19 6 1 44.19 18.99
 19 6 -1 64.19 21.21
 -19 6 -1 44.35 16.11
 19 6 -1 87.47 23.21
 -19 -6 -1 34.19 10.57
 19 6 1 43.94 16.98
 19 6 -1 95.16 33.64
 -19 6 -1 71.13 23.37
 19 6 1 38.29 17.86
 19 6 1 26.6 10.37
 19 6 1 40.3 16.96
 -19 6 -1 87.27 25.04
 -19 -6 1 81.4 21.64
 -19 6 -1 84.29 29.2
 -19 6 1 75.44 30.39
 -19 -6 1 105.23 27.1
 -19 -6 1 62.41 19.83
 -19 -6 -1 107.05 26.21
 -19 6 1 56.95 21
 19 6 -1 64.27 21.61
 -19 6 1 60.71 22.22
 -19 6 1 65.52 19.98
 20 6 -1 107.52 31.42
 -20 -6 -1 57.5 19.67
 20 6 -1 96.98 25.28
 -20 -6 1 94.73 26
 20 6 1 68.02 30.99
 -20 6 -1 45.72 17.1
 -20 -6 1 117.34 28.51
 -20 6 -1 68.8 22.49
 -20 6 1 97.37 27.43
 -20 6 1 85.83 24.94
 -20 6 1 100.55 34.65
 20 6 1 69.49 23.9
 20 6 -1 77.62 24.73
 -20 6 1 61.66 21.71
 20 6 1 64.91 22.95
 -20 -6 -1 64.02 20.41
 20 6 -1 87.33 33.2
 -20 -6 1 90.94 24.74
 20 6 -1 73.96 23.24
 20 6 1 54.24 21.48
 20 6 1 63.84 20.41
 20 6 -1 80.62 24.43
 -20 -6 -1 55.83 21.01
 -20 -6 1 92.26 24.03
 -20 6 -1 72.16 21.74
 -20 6 1 109.32 31.92
 -20 6 -1 70 22.34
 20 6 -1 99.58 27.01
 -20 -6 -1 137.3 29.29
 -20 6 -1 93.92 29.77
 -20 -6 -1 47.45 20.54
 21 6 1 3.7 2.54
 21 6 -1 12.1 9.85
 -21 -6 1 -7.62 7.27
 -21 -6 -1 5.33 9.38
 -21 6 1 -7.31 8.07
 -21 6 1 -0.24 4.14
 -21 -6 -1 10.43 13.21
 21 6 1 -12.94 16.76
 21 6 -1 6.27 5.5
 21 6 -1 4.53 4.39
 -21 6 -1 0.14 4.91
 -21 -6 1 7.7 1.95
 21 6 -1 -2.61 6.75
 21 6 -1 8.22 8.11
 21 6 1 1.7 6.09
 21 6 -1 6.95 11.13
 -21 6 -1 14.42 2.76
 -21 6 -1 4.04 5.65
 21 6 -1 16.01 13.94
 -21 6 -1 4.95 9.07
 -21 -6 -1 9.9 9.7
 -21 6 1 3.4 9.86
 -21 6 1 1.04 3.16
 -21 6 -1 -15.54 11.8
 -21 -6 1 3.63 3.44
 -21 -6 1 21.3 15.84
 21 6 1 8.93 7.25
 -21 6 1 8.62 8.83
 -21 -6 -1 27.26 15.33
 21 6 1 -2.59 2.75
 -21 -6 -1 13.47 10.63
 22 -6 1 60.37 21.94
 -22 6 1 125.85 35.8
 -22 -6 -1 102.18 26.96
 -22 -6 -1 83.67 27.53
 -22 6 -1 94.27 26.97
 -22 6 1 132.76 30.54
 22 6 1 74.66 24.39
 22 6 1 102.89 27.86
 -22 6 1 108.65 28.06
 -22 6 1 124.21 31.41
 -22 6 -1 112.71 28.3
 22 6 -1 111.27 28.48
 -22 6 -1 137.76 37.77
 -22 -6 1 163.06 33.46
 22 6 -1 129.85 39.69
 -22 -6 1 163.06 31.54
 22 6 -1 93.23 26.93
 -22 6 1 146.96 38.49
 22 6 -1 105.76 27.14
 22 6 1 93.09 26.57
 22 6 1 81.61 24.46
 22 6 -1 104.82 29.7
 22 6 1 70 29.8
 -22 -6 1 106.3 28.87
 -22 6 -1 176.74 35.18
 -22 6 -1 118.52 30.7
 -22 -6 -1 85.6 26.54
 -22 -6 1 102.54 28.33
 22 6 -1 125.06 35.63
 23 -6 1 -6.04 9.68
 -23 -6 1 8.01 8.19
 23 6 1 3.06 6.63
 -23 6 -1 8 5.93
 -23 6 1 -9.58 8.72
 -23 6 -1 5.58 10.27
 -23 -6 1 -13.66 10.5
 -23 6 -1 4.34 5.33
 -23 -6 -1 -2.61 7.36
 -23 6 1 -3.61 8.09
 23 6 -1 0.6 2.61
 23 6 1 1.42 12.12
 -23 -6 -1 4.9 7.76
 23 6 1 3.86 10.77
 23 6 1 15.98 8.68
 23 6 -1 -16.32 14.78
 -23 6 1 9.63 9.65
 23 6 1 -7.88 8.86
 -23 6 -1 3.79 7.38
 23 6 -1 -4.74 5.01
 -23 -6 1 -3.87 4.41
 -23 -6 1 -8.19 8.7
 23 6 -1 3.48 6.16
 23 6 -1 12.31 14.42
 -23 6 1 0.41 4.13
 23 -6 -1 3.37 3.95
 -23 -6 1 -2.6 9.56
 -23 -6 -1 5.35 2.5
 23 6 -1 12.58 11.11
 24 6 -1 24.12 17.85
 -24 -6 1 26.62 10.39
 -24 -6 1 15.14 11.36
 -24 -6 -1 29.52 15.94
 24 6 1 13.05 5.12
 -24 -6 1 47.96 16.72
 24 6 1 24.24 11.87
 -24 6 -1 27.74 11.06
 24 6 -1 29.21 11.53
 24 -6 1 -2.54 7.09
 -24 6 1 31.06 15.1
 -24 6 -1 27.77 15.2
 24 -6 -1 18.02 6.31
 -24 6 1 48.02 17.98
 24 6 -1 17.61 12.57
 24 6 -1 23.96 15.82
 -24 -6 1 40.01 16.65
 -24 6 -1 34.72 15.82
 24 6 1 23.67 15.98
 -24 6 1 26.41 14.42
 24 6 1 21.49 13.06
 -24 -6 -1 42.99 16.97
 24 6 -1 7.07 8.33
 -24 -6 1 37.18 15.43
 -24 -6 -1 12.72 7.98
 24 6 1 16.63 11.74
 25 6 -1 17.06 13.05
 -25 -6 1 2.65 8.83
 -25 -6 -1 3.39 3.64
 25 6 -1 9.23 6.42
 -25 6 -1 22.71 15.71
 25 6 1 17.49 12.27
 -25 6 1 13.09 9.63
 -25 6 -1 12.74 8.22
 25 6 -1 5.22 2.46
 25 -6 -1 2.57 6.19
 25 6 -1 -0.18 8.54
 -25 -6 1 15.59 9.11
 25 -6 1 17.98 8
 25 6 1 13.86 14.33
 -25 6 1 -4.12 10.64
 -25 -6 1 16.88 11.33
 -25 -6 -1 8.62 6.53
 -25 6 1 -1.84 8.81
 25 6 1 6.11 3.28
 -25 -6 1 13.3 10.04
 -25 -6 -1 0.09 3.04
 25 6 1 12.15 5.87
 25 6 1 10.15 9.69
 -26 6 1 23.65 10.52
 -26 -6 1 14.7 9.81
 26 -6 -1 24.75 13.83
 26 6 1 19.88 10.64
 26 6 -1 7.16 8.18
 -26 6 -1 30.85 16.01
 -26 -6 1 18.51 7.41
 -26 6 1 29.87 14.04
 26 6 -1 -4.06 14.86
 -26 -6 -1 10.42 6.46
 26 6 1 12.96 8.98
 26 6 -1 18.13 13.34
 26 -6 1 11.77 4.54
 26 6 -1 17.85 14.12
 -26 6 1 -2.2 9.69
 26 6 1 1.66 4.9
 -26 -6 -1 19.65 12.94
 -26 -6 1 18.89 9.23
 26 6 1 3.4 8.44
 -26 -6 1 20.39 9.33
 -26 -6 -1 24.03 13.51
 26 6 1 28.23 18.54
 -27 -6 -1 5 2.74
 -27 -6 1 10.61 6.9
 -27 6 1 10.27 7.52
 27 6 -1 -0.73 6.26
 27 -6 1 4.45 3.68
 27 6 1 6.5 3.66
 27 6 1 0.07 4.3
 -27 -6 -1 13.96 9.75
 27 -6 1 0.7 4
 27 -6 -1 -3.04 6.87
 27 6 -1 6.38 7.48
 27 6 -1 1.27 3.73
 27 6 1 6.73 6.19
 27 6 1 -2.2 5.85
 -27 6 1 3 4.26
 -27 -6 1 -0.78 4.27
 -27 -6 1 -1.27 3.5
 -27 -6 1 5.41 5.08
 27 6 1 12.15 15.3
 -27 6 -1 11.24 7.46
 -27 -6 -1 3.23 2.13
 27 6 -1 -0.33 4.67
 -28 -6 -1 15.79 8.43
 28 6 -1 6.78 6.66
 28 -6 1 7.21 3.37
 28 6 1 26.04 11.03
 28 6 -1 27.91 12.68
 28 -6 1 20.19 9.1
 28 -6 -1 3.81 2.4
 -28 6 1 28.16 13.86
 -28 -6 1 21.67 6.58
 -28 6 -1 30.39 12.33
 -28 -6 1 30.5 13.29
 -28 6 1 23.14 9.18
 28 6 1 3.01 8.23
 -28 -6 -1 25.73 12.61
 28 6 -1 13.1 8.53
 -28 -6 -1 25.74 9.49
 28 6 1 8.3 9.59
 28 6 -1 1.85 9.94
 28 -6 -1 5.39 4.65
 -28 -6 1 30.96 13.8
 -28 -6 1 22.07 10.08
 29 -6 1 1.24 3.57
 -29 -6 1 4.06 4.8
 -29 -6 1 18.29 11.46
 -29 6 1 4.93 8.42
 29 -6 -1 -0.1 2.62
 -29 6 -1 2.11 3.99
 29 -6 -1 -1.36 3.6
 -29 -6 1 10.69 5.9
 29 6 -1 -2.61 3.74
 -29 6 1 0.15 3.67
 29 6 -1 0.97 5.18
 29 6 -1 -6.06 7.23
 29 -6 -1 -3.89 5.3
 29 -6 1 4.05 3.82
 29 6 1 3.65 6.75
 -29 -6 -1 -6.38 10.29
 -29 -6 -1 4.37 3.91
 29 6 1 -3.17 4.93
 -29 -6 1 -9.46 9.48
 29 6 1 -11.22 10.11
 30 -6 1 29.47 11
 30 6 1 13.92 4.72
 30 -6 -1 16.85 7.9
 -30 6 -1 73.25 17.22
 -30 -6 -1 62.66 17.65
 30 6 -1 37.11 13.4
 -30 -6 -1 74.37 17.76
 30 6 1 38.61 13.65
 30 6 1 15.71 6.09
 0 7 -1 10.09 13.5
 0 7 1 -7.87 9.44
 0 7 -1 4.55 6.14
 0 7 1 -23.05 14.25
 0 7 1 5.53 6.89
 0 -7 -1 7.71 11.41
 0 -7 1 -11.72 9.77
 0 -7 -1 -5.93 8.23
 0 -7 1 4.39 5.21
 0 7 1 -3.03 6.29
 0 7 -1 0.87 1.6
 0 -7 -1 -1.66 7.76
 1 -7 -1 4.6 4.54
 1 -7 -1 2.45 6.36
 -1 7 1 7.69 10.95
 -1 7 -1 -1.9 5.02
 -1 -7 -1 6.05 13.29
 1 -7 1 -18.69 15.45
 -1 7 1 4.1 7.16
 1 7 1 -6.8 13.87
 1 -7 1 -1.15 8.94
 -1 7 -1 -0.1 6.57
 1 7 1 0.43 13.72
 1 7 1 0.72 11.29
 -1 -7 1 -13.77 10.63
 1 7 1 -1.67 4.09
 -1 7 1 3.57 12.33
 -1 -7 -1 12.49 15.08
 1 7 -1 4.76 11.41
 1 7 -1 -22.52 13.42
 -1 -7 1 -11.75 12.4
 1 7 -1 -3.33 9.09
 1 -7 -1 -3.66 5.47
 -1 -7 -1 -0.29 6.67
 -1 7 1 -1.87 4.45
 -2 7 -1 242.69 58.32
 2 -7 -1 588.98 71.57
 -2 7 1 597.72 74.43
 -2 -7 -1 733.76 80.94
 2 7 -1 558.75 67.77
 2 7 1 469.43 79.9
 2 -7 -1 638.39 81.8
 2 7 -1 500.88 76.47
 -2 7 1 511.87 83.3
 -2 -7 -1 563.68 78.91
 -2 -7 1 665.2 74.25
 2 7 1 416.41 65.96
 2 -7 1 484.95 80.3
 -2 -7 1 478.18 79.15
 -2 7 1 468.46 76.57
 -2 7 1 537.34 79.07
 -2 7 -1 613.7 87.75
 2 7 -1 409.81 68.05
 2 7 1 576.02 72.13
 2 7 1 530.14 77.32
 2 -7 1 648.68 72.42
 -2 -7 -1 640.03 76.87
 3 -7 -1 54.58 24.93
 3 -7 -1 68.15 23.88
 3 7 1 46.51 22.39
 -3 7 1 48.7 25.62
 -3 7 -1 23.76 16.08
 3 7 -1 36.59 19.54
 -3 -7 -1 66.51 24.79
 -3 -7 -1 70.26 24.68
 -3 7 1 72.24 25.86
 3 -7 1 42.08 23.54
 3 7 -1 64.63 21.9
 -3 -7 -1 85.68 28.35
 3 -7 1 67.39 24.35
 3 7 1 69.69 24.71
 -3 7 -1 63.9 29.97
 3 7 1 42.71 23.37
 3 7 1 49.46 20.94
 3 7 -1 36.54 19.43
 -3 7 1 56.5 29.04
 -3 -7 1 75.22 24.36
 -3 -7 1 66.77 29.46
 -3 7 1 39.09 24.12
 -4 -7 -1 3269.27 166.81
 4 7 1 1977.18 147.67
 4 -7 1 2088.42 164.36
 4 -7 -1 2841.7 158.42
 4 -7 1 2896.01 156.03
 4 7 -1 2750.35 158.33
 -4 7 1 2177.62 168.88
 4 7 1 2306.2 183.57
 4 -7 -1 2471.47 173.2
 -4 7 1 2270.45 178.79
 -4 -7 1 2809.4 157.44
 -4 -7 -1 2275.03 163.42
 4 -7 -1 2823.47 199.9
 4 7 -1 2196.75 155.8
 4 7 1 2955.16 181.06
 4 7 -1 2496.15 169.87
 -4 7 1 2811.55 167.36
 4 7 1 2858.49 164.73
 4 -7 1 2811.65 180.29
 -4 -7 1 2389.98 183.46
 -4 7 -1 2579.97 187.87
 -4 7 -1 2817.41 198.63
 -4 -7 -1 2882.04 172.72
 5 -7 1 167.76 43.29
 5 7 -1 141.33 38.39
 5 7 1 145.83 38.75
 -5 7 -1 170.18 49.25
 -5 7 1 134.98 43.03
 5 -7 -1 144.43 46.69
 5 7 1 102.75 33.09
 -5 7 1 138.91 35.16
 -5 -7 -1 136.1 41.09
 5 -7 -1 165.47 37.31
 -5 7 -1 151.34 45.03
 5 7 -1 134.02 33.95
 -5 7 1 93.11 34.75
 5 7 1 135.06 43.34
 -5 -7 1 98.93 39.02
 5 -7 1 69.02 29.84
 5 7 -1 137.65 38.28
 -5 -7 -1 124.92 37.09
 -5 -7 1 119.08 30.98
 5 -7 -1 138.73 43.26
 6 -7 -1 2372.95 180.05
 6 -7 -1 2627.26 156.3
 -6 -7 1 2575.26 158.85
 6 -7 1 2580.33 163.6
 6 -7 1 1970.82 155.89
 6 7 1 2868.19 172.59
 -6 7 -1 2305.65 181.84
 -6 7 1 2152.14 174.35
 6 7 -1 2394.21 168.87
 6 7 -1 2618.54 161.75
 6 -7 1 2586.61 161.38
 6 -7 -1 2433.86 201.98
 6 7 -1 2558.23 164.85
 -6 7 1 2040.43 169.43
 -6 7 -1 2384.16 191.48
 -6 -7 1 2040.26 171.77
 6 7 1 2475.72 192.44
 -6 7 -1 2742.3 200.99
 6 7 1 1701.85 138.92
 -6 -7 -1 2645.12 179.77
 -6 -7 -1 2678.9 176.88
 7 7 -1 138.92 38.5
 -7 7 1 132.8 43.93
 7 -7 1 130.83 35.7
 -7 -7 -1 126.08 38.86
 7 7 -1 141.26 42.12
 7 7 -1 141.64 38.55
 -7 -7 -1 160.63 43.65
 -7 -7 1 195.36 45.46
 -7 7 -1 142.39 46.35
 7 7 1 92.01 30.59
 7 -7 -1 125.03 34.69
 7 -7 -1 145.79 46.99
 -7 7 -1 149.41 45.79
 7 7 1 109.94 35.2
 7 7 1 191.06 46.31
 7 -7 1 191.99 42.86
 7 -7 -1 152.82 53.74
 -7 7 1 104.41 42.05
 -7 -7 1 147.34 47.46
 8 7 1 675.04 91
 8 7 1 542.92 87.76
 -8 -7 -1 431.41 75.47
 -8 7 1 505.62 85.96
 -8 7 1 491.19 85.4
 8 7 -1 624.97 83.03
 -8 -7 1 540.05 89.31
 8 -7 -1 592.04 94.56
 -8 -7 -1 458.94 83.34
 -8 7 -1 511.03 87.8
 -8 7 -1 622.31 99.84
 -8 -7 -1 732.09 99.35
 8 7 -1 612.84 87.1
 -8 -7 1 614.43 82.38
 8 -7 -1 535.67 75.3
 8 -7 -1 521.79 99.46
 8 -7 1 573.82 80.08
 8 7 1 401.54 68.53
 9 -7 1 -18.37 14.9
 9 7 1 -3.95 14.79
 -9 7 1 1.23 4.02
 9 7 -1 7.55 10.69
 -9 7 -1 -8.29 16.8
 -9 -7 -1 -13.69 23.73
 9 7 -1 -10.79 11.59
 9 -7 -1 0.08 9.35
 -9 7 -1 10.35 4.32
 -9 -7 1 7.37 14.74
 -9 -7 -1 -6.62 19.4
 9 -7 -1 -14.61 22.72
 9 7 1 8.92 12.27
 -9 7 1 8.86 9.79
 -9 -7 1 2.11 8.41
 -9 -7 -1 -0.69 7.75
 10 7 1 206.52 51.75
 10 -7 -1 394.96 83.79
 -10 -7 1 401.61 70.43
 -10 7 1 317.21 74.5
 10 7 -1 395.96 72.62
 -10 -7 1 424.72 79.85
 10 -7 1 255.84 65.58
 -10 7 -1 315.49 73.42
 -10 7 -1 406.04 82.61
 -10 7 1 372.39 76.19
 10 -7 1 391.03 72.76
 10 7 1 421.7 74.06
 10 -7 -1 313.63 84.01
 -10 -7 -1 207.44 54.49
 10 7 -1 339.44 65.8
 -10 -7 -1 303.52 67.39
 -10 -7 -1 348.91 70.56
 -11 -7 -1 4.68 4.67
 11 7 -1 21.77 11.61
 -11 -7 -1 -10.02 12.38
 -11 -7 1 9.53 15.72
 11 -7 -1 44.5 37.06
 11 -7 -1 -4.32 23.3
 11 7 1 5.68 9.7
 -11 -7 1 16.11 19.88
 -11 7 1 0.65 5.5
 11 7 1 43.71 22.55
 -11 7 -1 13.82 13.35
 -11 -7 -1 6.23 12.56
 -11 7 1 32.87 31.11
 11 7 -1 4.62 6.1
 11 -7 1 -2.95 24.08
 -11 7 -1 14.94 15.58
 11 -7 1 -0.83 10.28
 -12 7 1 93.26 41.44
 12 7 -1 102.59 38.59
 12 7 1 119.49 43.2
 -12 -7 -1 47.93 23.84
 -12 -7 1 89 37.24
 -12 -7 -1 108.6 43.14
 -12 -7 1 150.79 49.15
 12 7 1 93.43 37.77
 12 7 -1 147.19 43.31
 12 -7 1 70.21 34.41
 -12 -7 -1 126.91 46.36
 -12 7 -1 81.22 37.3
 12 -7 -1 72.35 37.78
 12 -7 1 79.28 34.57
 12 -7 -1 76.83 41.42
 -12 7 -1 103.62 42.01
 -13 7 -1 3.35 18.3
 13 7 -1 37.46 23.24
 13 7 1 9.06 8.49
 13 7 -1 20.41 7.91
 -13 -7 -1 9.47 11.44
 13 7 1 -6.15 9.03
 -13 7 -1 23.35 12.26
 -13 -7 -1 9.01 9.74
 -13 7 1 8.35 7.04
 -13 7 1 17.2 9.81
 13 7 1 14.72 8.74
 13 7 1 6.36 5.65
 13 7 -1 25.39 13.66
 13 -7 1 13.41 20.32
 13 7 1 1.41 7
 13 7 -1 17.67 11.42
 -13 -7 -1 6.8 6.16
 -13 7 -1 20.15 13.14
 13 -7 -1 36.7 29.92
 -13 7 1 12.09 10.56
 -13 -7 1 51.32 29.26
 -13 7 -1 19.81 14.77
 -13 7 -1 9.71 8.98
 13 7 -1 20.18 12.39
 -13 7 1 26.11 13.96
 -13 -7 1 4.38 6.99
 13 7 -1 43.47 17.45
 13 7 1 34.67 18.13
 -13 7 1 9.92 5.6
 13 7 1 14.58 8.64
 13 7 -1 9.83 11.63
 13 -7 -1 -15.98 20.05
 14 7 1 569.9 68.74
 -14 7 1 525.66 58.35
 14 -7 -1 507.62 101.88
 -14 -7 -1 508.7 102.37
 -14 7 -1 668.37 115.52
 -14 7 1 732.39 77.22
 -14 7 -1 578.88 62.44
 14 7 -1 734.5 65.92
 -14 -7 1 658.42 101.87
 14 7 1 573.06 60.92
 -14 7 -1 472.79 56.82
 14 7 -1 873.1 73.14
 14 7 1 486.94 56.21
 -14 7 -1 596.96 63.36
 14 7 -1 835.41 69.82
 14 -7 1 384.01 89.99
 -14 -7 1 615.89 56.9
 -14 -7 1 595.92 100.48
 14 7 1 606.73 77.05
 -14 -7 -1 643.26 102.23
 -14 7 -1 492.48 95.92
 -14 7 1 667.85 66.91
 14 7 -1 898.7 120.4
 -14 7 1 627.6 63.26
 14 7 1 643.54 105.76
 -14 7 1 827.53 93.42
 14 7 1 421.84 86.13
 -14 7 -1 579.32 78.4
 14 7 -1 891.53 89.48
 14 7 -1 751.12 106.27
 -14 -7 -1 573.73 62.05
 -14 7 1 460.13 93
 14 7 1 491.82 69.55
 14 7 1 626.84 65.7
 14 -7 -1 567.77 122.22
 14 7 -1 843.38 77.08
 14 7 1 560.75 65.07
 15 7 1 26.28 16.18
 15 7 -1 45.97 18.38
 -15 -7 -1 22.03 13.02
 -15 7 -1 44.07 17.13
 15 7 -1 32.92 10.89
 15 7 1 26.8 13.43
 15 7 1 15.4 10.75
 15 -7 1 27.89 21.16
 15 -7 -1 22.45 21.68
 -15 -7 1 21.71 18.87
 -15 7 1 38.21 16.12
 15 7 1 81.57 38.85
 15 7 -1 36.33 14.67
 -15 7 -1 35.68 16.11
 -15 7 1 28.44 17.14
 -15 7 1 34.9 15.41
 15 7 -1 30.71 12.96
 15 7 1 44.5 20.3
 15 -7 -1 28.46 27.61
 15 7 -1 77.11 34.22
 -15 -7 -1 7.67 4.25
 -15 7 -1 24.2 15.32
 -15 7 -1 8.59 9.73
 15 7 1 33.36 16.93
 -15 7 1 19.57 8.36
 15 7 1 23.66 14.57
 -15 7 1 39.81 23.15
 -15 -7 -1 27.6 14.93
 15 7 -1 37.89 19.37
 -15 7 -1 51.37 35.22
 15 7 1 28.15 14.35
 -15 -7 1 31.01 12.95
 -15 -7 1 46.88 24.17
 -16 -7 -1 236.52 40.73
 16 7 1 254.81 48.73
 16 7 -1 412.55 65.94
 16 7 -1 364.38 48.31
 16 7 -1 355.16 48.78
 -16 7 -1 299.74 46.13
 -16 -7 1 331.07 43.81
 16 7 1 243.72 41.48
 16 7 -1 330 47.56
 16 7 1 269.79 46.51
 -16 7 1 346.41 62.8
 -16 7 -1 270.09 44.43
 16 7 -1 357.65 47.72
 -16 7 1 356.2 56.6
 -16 7 -1 291.48 44.88
 16 7 1 269.84 43.57
 -16 7 -1 307.79 58.27
 16 7 1 242.54 49.45
 -16 7 1 342.28 48.56
 -16 -7 -1 246.51 41.24
 -16 7 1 263.87 42.21
 16 7 -1 339.22 51.17
 16 7 1 253.84 51.72
 16 7 1 261.27 42.15
 -16 7 1 290.19 43.54
 -16 -7 1 311.09 46.68
 -17 -7 -1 54.3 20.36
 -17 -7 1 61.65 21.49
 -17 7 1 103.87 29.51
 17 7 -1 105.66 27.08
 -17 -7 -1 46.07 19.3
 17 7 -1 92.82 23.98
 -17 7 1 80.31 24.03
 17 7 1 54.48 18.7
 17 7 -1 109.02 27.17
 -17 7 -1 96.16 26.55
 -17 7 -1 69.43 23.92
 17 7 -1 77.74 22.19
 -17 7 -1 74.41 22
 -17 7 1 100.5 26.88
 17 7 1 56.32 19.68
 17 7 1 75.22 23.4
 -17 7 1 101.39 33.77
 17 7 -1 123.96 31.81
 -17 -7 1 115.55 26.84
 -17 -7 1 77.38 22.63
 17 7 1 62.66 19.77
 17 7 1 85.3 28.52
 -17 7 -1 83.39 30.29
 17 7 -1 129.23 37.04
 17 7 1 60.4 20.62
 -17 7 1 73.46 19.66
 -18 7 -1 369.99 52.55
 18 7 1 337.64 61.59
 18 7 -1 545.18 62.33
 -18 7 1 390 51.46
 -18 7 -1 390.67 53.19
 -18 7 -1 369.71 62.66
 -18 -7 1 455.81 53.84
 18 7 -1 540.26 67.8
 -18 7 1 435.97 56.2
 18 7 1 311.72 47.04
 -18 7 1 438.7 65.23
 18 7 -1 412.16 53.22
 -18 7 -1 326.09 49.81
 -18 7 1 512.83 74.92
 18 7 -1 495.4 59.19
 -18 -7 1 393.34 51.86
 -18 -7 1 374.87 52.6
 18 7 -1 523.14 76.27
 18 7 1 317.7 50.4
 18 7 -1 448.86 57.86
 -18 -7 -1 384.83 54.33
 18 7 1 357.74 52.69
 -18 -7 -1 347.99 49.62
 18 7 1 382.25 57.98
 19 7 -1 81.29 25.12
 -19 7 1 80.56 23.31
 -19 7 -1 55.02 18.84
 -19 7 -1 51.6 17.79
 19 7 1 57.3 21.95
 -19 -7 1 72.32 22.34
 19 7 1 59.1 25.59
 -19 -7 1 74.35 25.48
 19 7 -1 78.7 29.25
 19 7 1 66.8 20.24
 19 7 -1 70.18 22.76
 -19 -7 -1 67.02 23.03
 19 7 -1 71.3 23.23
 -19 -7 -1 55.06 20.39
 -19 7 -1 61.59 21.59
 19 7 1 52.09 20.18
 19 7 -1 76.85 23.59
 -19 7 1 100.19 30.51
 -19 -7 1 70.06 21.32
 -19 7 1 70.49 22.88
 -19 7 -1 53.53 20.97
 19 7 1 54.9 21.66
 -19 7 1 73.13 28.88
 -19 -7 1 92.53 24.05
 19 7 -1 67.2 20.61
 -20 -7 1 127.83 29.69
 -20 7 -1 97.11 27.34
 20 7 -1 168.84 36.22
 -20 7 1 152.56 32.24
 20 7 -1 165.4 36.58
 20 7 -1 170.24 36.21
 20 7 -1 173.01 44.74
 -20 -7 -1 103.12 29.37
 20 7 -1 177.91 41.62
 -20 7 -1 135.14 32.66
 20 7 -1 125.15 30.08
 20 7 1 127.72 33.71
 -20 7 1 159.63 38.44
 -20 -7 -1 115.51 25.52
 -20 -7 1 208.89 37.89
 -20 7 1 152.41 39.64
 -20 7 1 137.77 32.56
 -20 -7 1 167.2 33.38
 20 7 1 135.81 32.42
 -20 7 -1 141.13 37.74
 20 7 1 74.36 28.79
 -20 7 -1 137.81 32.51
 -20 -7 -1 108.33 28.03
 20 7 1 90.37 26.71
 20 7 1 98.94 28.68
 -20 -7 1 146.76 31.77
 -21 -7 1 6.02 7.21
 -21 7 1 6.14 9.13
 -21 7 1 30.27 13.58
 -21 -7 -1 5.06 6.86
 -21 -7 1 6.94 6.18
 -21 -7 -1 1.04 7.12
 21 7 1 7.38 11.1
 -21 -7 -1 11.11 8.73
 -21 7 -1 14.48 8.04
 21 7 1 7.07 8.54
 -21 7 -1 -5.62 10.95
 21 7 -1 2.5 4.65
 -21 7 -1 4.6 7.08
 21 7 -1 3.58 13.76
 -21 -7 1 16.21 10.98
 -21 7 1 11.42 11.01
 -21 -7 1 11.45 11.32
 21 7 -1 10.86 9.29
 21 7 -1 3.86 3.29
 21 7 -1 8.57 4.15
 -21 7 -1 10.65 10.18
 21 7 1 5.21 4.28
 -21 -7 -1 25.6 17.13
 -21 7 1 20.35 12
 21 7 1 22.89 15.61
 21 7 1 -1.45 3.57
 21 7 -1 35.55 22.6
 -22 7 -1 9.41 4.63
 -22 7 1 13.51 8.78
 22 7 -1 17.88 6.74
 22 -7 -1 -4.03 14.99
 -22 7 1 12.64 10.82
 22 7 -1 -5.72 7.64
 -22 7 -1 -3.34 6.1
 -22 -7 1 -4.36 10.42
 22 7 -1 1.77 3.93
 22 7 1 -1.78 8.88
 -22 7 -1 12.35 10.98
 22 7 1 9.01 10.59
 -22 -7 1 15.36 10.42
 -22 7 1 6.29 4.01
 22 7 -1 9.16 7.19
 -22 -7 1 2.49 8.18
 -22 -7 -1 14.76 10.8
 -22 -7 -1 15.16 9.56
 -22 -7 -1 14.56 14.4
 22 7 1 -4.23 7.71
 -22 7 1 -5 14.3
 -22 7 -1 16.01 12.73
 -22 -7 -1 12.24 9.06
 22 7 1 -12.72 13.18
 22 7 -1 10.94 13.24
 22 7 1 12.38 11.45
 -22 -7 1 3.51 6.66
 22 7 -1 2.89 2.71
 -23 -7 1 -5.14 7.7
 -23 -7 -1 43.45 18.01
 23 7 1 -5.1 6.39
 -23 -7 1 7.04 7.13
 -23 -7 1 5.94 5.83
 -23 -7 -1 -7.21 10.44
 23 7 1 -3.32 2.82
 23 7 1 -9.82 10.68
 -23 7 -1 -0.77 7.07
 23 7 -1 7.27 10.79
 23 7 1 13.65 11.05
 23 7 1 11.39 10.37
 23 7 -1 -2.24 3.42
 23 7 -1 1.1 10.49
 -23 -7 -1 7.05 6.75
 -23 7 1 -0.1 8.86
 -23 -7 -1 -1.37 8.37
 23 7 -1 -0.85 7.01
 23 7 -1 2.63 3.66
 -23 7 -1 13.5 9.11
 -23 7 -1 5.67 8.28
 -23 7 1 -2.13 8.67
 23 -7 -1 0.3 6.85
 -23 -7 1 7.14 6.39
 -23 7 1 -3.79 10.91
 -24 -7 1 -8.04 9.44
 -24 7 -1 -1.34 5.43
 -24 -7 -1 5.89 6.42
 24 7 -1 -3.21 6.15
 -24 7 -1 -14.21 13.96
 24 7 -1 -1.19 6.05
 -24 -7 -1 0.61 5.24
 -24 7 1 -1.42 3.12
 24 7 1 -2.6 3.6
 24 7 -1 8.71 10.09
 -24 -7 -1 -8.04 8.6
 24 7 1 4.77 11.88
 24 -7 -1 14.54 11.33
 -24 7 1 8.67 10.06
 24 7 1 -1.07 7.85
 24 7 1 -1.24 8.04
 -24 7 1 0.26 4.61
 -24 -7 1 15.84 10.73
 -24 -7 1 2.58 2.84
 -24 -7 1 -0.46 3.91
 24 7 1 -1.77 5.01
 -24 -7 1 13.5 10.66
 24 7 -1 -8 10.38
 25 -7 -1 -3.39 8
 25 7 1 6.54 3.98
 -25 7 1 6.79 6.8
 25 -7 1 -15.83 12.16
 -25 -7 1 1.22 4
 -25 -7 -1 11.89 9.49
 -25 -7 1 22.99 14.72
 25 7 1 7.88 4.25
 25 7 1 -0.24 6.4
 25 7 -1 7.1 5.04
 -25 -7 1 22.26 10.56
 25 7 -1 6.83 8.82
 25 7 -1 5.74 8.33
 25 7 -1 6.49 4.17
 25 7 1 5.91 7.09
 -25 -7 1 4.5 4.13
 -25 7 1 -2.95 8.68
 -25 7 -1 9.82 8.39
 -25 -7 -1 7.46 5.67
 -25 7 1 11.98 9.13
 25 7 1 -7.45 9.73
 -25 -7 -1 -3.75 2.65
 -25 -7 1 4.91 7.32
 -26 7 -1 -0.48 10.22
 26 7 1 -5.03 4.64
 -26 7 1 -9.14 14.5
 26 7 1 -3.57 3.69
 -26 7 1 -6.73 9.06
 -26 -7 -1 -7.46 7.07
 26 7 -1 -10.6 10.93
 26 7 1 -5.01 6.29
 -26 -7 1 2.77 2.09
 26 -7 -1 14.7 7.89
 26 -7 1 -2.66 3.28
 -26 -7 1 10.44 10.89
 26 7 1 6.89 10.71
 -26 7 1 -2.75 2.71
 26 7 -1 -1.62 5.6
 -26 -7 -1 2.23 4.19
 26 7 -1 -2.27 8.07
 26 7 -1 -5.97 5.45
 -26 -7 1 2.5 6.28
 -26 -7 1 -3.44 5.38
 26 7 1 -3.8 4.8
 -26 -7 -1 -3.38 3.31
 -27 -7 1 15.24 7.92
 -27 -7 1 22.66 11.16
 27 7 -1 2.22 5.99
 27 -7 1 9.44 8.52
 27 7 1 1.41 3.51
 -27 7 1 8.83 7.16
 27 7 -1 1.14 5.18
 27 -7 -1 9.83 8.77
 27 7 1 16.18 9.28
 -27 -7 -1 7.6 8.34
 -27 -7 -1 5.52 5.91
 27 -7 1 -4.09 7.46
 -27 -7 -1 2.27 7.46
 27 7 -1 -5.14 9.52
 -27 7 -1 12.34 7.43
 27 7 1 -2.63 9.38
 -27 -7 1 1.39 3.57
 27 7 1 1.93 6.87
 27 7 -1 10 9.43
 -27 -7 1 16.27 10.88
 27 7 1 10.04 7.38
 28 7 1 4.86 7.03
 28 7 1 5.29 2.35
 -28 7 1 16.97 7.14
 -28 -7 -1 22.13 10.12
 28 7 -1 28.86 14.59
 28 -7 -1 -1.15 6.36
 28 -7 1 0.95 3.83
 28 7 1 4.36 3.01
 28 7 -1 3.9 4.23
 -28 -7 1 14.82 7.81
 28 -7 1 12.42 8.7
 -28 -7 -1 20.89 10.57
 -28 -7 1 20.31 9.28
 28 -7 -1 17.73 11.32
 -28 7 -1 21.37 11.33
 28 7 1 -2.13 9.69
 28 7 1 2.18 6.5
 -28 -7 -1 5.44 6.35
 -28 -7 1 22.93 9.24
 29 7 1 24.59 12.52
 29 -7 -1 -0.98 4.99
 29 7 1 8.1 6.35
 29 7 1 3.67 5.97
 29 -7 1 12.07 7.16
 29 7 -1 -11.61 5.94
 -29 -7 -1 -7.29 9.05
 -29 -7 -1 -10.25 8.83
 29 7 -1 2.68 5.54
 29 -7 -1 -1.79 4.4
 -29 7 -1 -6.43 7.64
 -29 -7 1 5.65 5.12
 0 8 1 -2.8 12.69
 0 -8 1 6.11 6.61
 0 -8 -1 10.55 13.67
 0 8 1 1.48 3.48
 0 8 -1 12.37 16.62
 0 -8 -1 1.09 4.59
 0 -8 1 0.34 2.11
 0 8 1 -18.93 14.4
 0 8 1 -4.3 15.6
 0 8 -1 -8.82 19.54
 1 -8 -1 108.8 35.92
 -1 -8 -1 103.62 31.46
 -1 8 1 67.92 31.85
 -1 -8 1 101.61 31.7
 -1 8 1 115.66 39.35
 -1 -8 -1 115.52 37.25
 1 8 1 77.34 30.25
 1 8 1 75.2 30.97
 1 -8 1 67.4 32.53
 1 8 -1 120.81 40.83
 1 -8 -1 129.7 41.08
 1 -8 1 129.39 35.95
 -1 8 -1 116.42 43.84
 1 8 -1 30.73 19.69
 1 8 1 119.42 34.5
 -1 8 1 103.28 34.43
 1 8 1 59.42 26.88
 -1 -8 1 57.92 27.52
 -1 8 1 77.3 32.09
 -2 -8 -1 7.17 12.12
 2 8 1 -6.59 18.07
 -2 -8 1 3.39 5.19
 2 8 -1 7.43 13.58
 -2 8 1 -1.66 8.07
 -2 8 1 4.14 7.06
 2 -8 1 6.03 7.7
 -2 -8 -1 13.83 11.2
 2 -8 -1 1.2 12.93
 -2 -8 1 11.45 14.21
 -2 8 1 11.8 15.59
 -2 8 1 -8.73 19.57
 2 -8 -1 -6.86 19.07
 2 8 1 -37.42 23.91
 -2 -8 -1 -4.57 8.54
 -2 8 -1 7.05 19.31
 2 -8 1 6.05 9.5
 2 8 -1 -0.59 4.17
 2 8 1 -24.93 16.44
 2 8 1 14.58 11.96
 3 8 1 75.52 30.26
 3 -8 1 38.48 22.02
 3 8 1 79.06 29.48
 -3 -8 -1 72.03 28.05
 3 8 1 41.03 23.76
 3 -8 1 70.38 24.85
 -3 -8 1 29.85 20.02
 -3 -8 1 105.42 33.33
 3 -8 -1 54.23 25.57
 -3 8 1 50.02 24.69
 3 8 -1 49.07 22.59
 -3 8 1 23.51 16.91
 -3 8 1 47.91 22.71
 3 8 1 64.94 32.55
 -3 8 1 45.83 24.04
 3 8 -1 9.69 13.88
 3 -8 -1 58.43 26.51
 -3 -8 -1 38.51 19.58
 -3 8 -1 63.58 28.11
 3 8 -1 66.89 30.28
 -4 8 1 4.84 8.22
 4 -8 1 1.03 3.9
 -4 -8 -1 -0.87 5.17
 4 -8 -1 9.86 3.63
 4 8 -1 29.38 16.33
 4 8 1 0.72 2.89
 -4 -8 1 19.14 4.69
 4 8 1 9.29 14.38
 4 8 -1 9.5 3.24
 -4 -8 -1 -6.98 5.76
 -4 -8 1 -3.21 16.67
 -4 8 1 20.13 22.67
 -4 8 -1 16.86 20.87
 4 -8 1 17.7 15.37
 4 8 -1 0.84 6.38
 4 8 1 17.25 16.37
 -5 -8 -1 80.01 31.42
 -5 8 -1 124.89 42.92
 -5 8 -1 88.53 33.9
 5 8 -1 50.64 21.76
 -5 8 1 72.89 36.92
 5 -8 -1 79.66 34.37
 -5 8 1 80.75 35.97
 -5 -8 1 73.21 22.44
 5 -8 1 67.35 31.05
 5 8 1 71.33 29.25
 -5 -8 -1 106.74 39.1
 -5 -8 1 46.33 26.99
 5 8 -1 28.98 15.31
 5 8 1 89.5 36.34
 5 8 -1 70.42 28.89
 5 -8 1 96.96 35.87
 5 8 1 51.91 23.16
 -6 8 -1 27.14 22.99
 -6 8 1 26.33 25.13
 6 -8 1 10.02 10.89
 6 8 -1 11.15 12.25
 -6 -8 -1 10.15 13.47
 -6 8 1 17.81 19.46
 6 8 1 26.14 18.2
 6 8 1 -0.26 12.69
 6 8 1 27.15 17.26
 6 -8 -1 23.96 18.35
 -6 -8 1 18.58 18.76
 -6 8 -1 49.64 30.3
 -6 -8 -1 42.66 24.34
 6 8 -1 6.31 3.79
 -6 -8 1 16.84 6.43
 -7 8 -1 106.03 42
 7 8 -1 86.77 30.42
 7 8 1 90.83 35.67
 7 8 -1 125.02 41.79
 -7 -8 1 60.38 33.26
 7 8 1 139.78 43.62
 -7 -8 -1 113.49 39.37
 -7 8 1 107.95 42.55
 7 8 1 104.27 39.69
 -7 -8 -1 89.09 32.62
 -7 -8 -1 22.16 12.57
 7 -8 -1 132.69 49.89
 7 -8 -1 91.75 34.21
 -7 -8 1 85.26 29.28
 -7 8 1 79.88 34.93
 8 8 1 77.02 29.61
 8 8 -1 75.82 30.02
 -8 8 1 114.8 47.59
 8 -8 -1 83.69 37.39
 8 8 1 126.22 40.29
 -8 -8 1 104.44 33.27
 8 -8 1 79.87 35.07
 -8 8 1 115.16 45.64
 -8 -8 -1 95.56 37.25
 8 8 -1 133.22 44.15
 -8 -8 1 82.26 34.12
 -8 -8 -1 101.15 37.87
 -8 8 -1 88.65 36.82
 -8 -8 -1 89.78 38.22
 8 -8 -1 88.75 36.34
 9 8 -1 102.69 36.78
 9 8 -1 116.27 40.21
 9 -8 1 68.71 32.15
 9 8 1 124.93 41.65
 -9 -8 -1 100.26 44.28
 -9 -8 -1 121.15 44.51
 -9 8 1 79.8 38.86
 -9 8 -1 87.97 41.32
 -9 -8 -1 80.98 38.43
 9 -8 -1 119.96 44.91
 9 -8 -1 81.28 40.13
 -9 -8 1 113.51 39.18
 -9 8 1 94.3 40.12
 9 8 1 75.82 25.54
 -9 -8 1 67.39 33.75
 10 8 1 243.64 42.98
 -10 8 1 197.31 58.75
 -10 8 1 281.71 46.81
 10 -8 -1 179.92 62.95
 10 8 -1 276.03 65.73
 -10 8 -1 244.14 64.85
 -10 -8 -1 318.28 70.79
 -10 -8 1 235.32 57.41
 10 8 -1 178.13 50.69
 -10 8 -1 301.76 75.98
 -10 -8 1 170.64 54.3
 10 8 1 262.89 39.18
 10 8 -1 281.4 40.83
 -10 -8 -1 235.43 61.48
 10 -8 1 204.22 63.12
 -10 8 1 283.49 52.05
 10 8 1 198.12 41.8
 10 -8 -1 236.86 65.28
 -10 8 -1 258.39 42
 -10 8 -1 238.5 48.62
 -10 8 1 216.51 62.39
 10 8 1 267.91 65.29
 10 8 1 236.23 58.35
 -10 -8 -1 175.14 55.51
 -10 8 1 277.04 41.41
 10 8 -1 307.89 43.78
 11 -8 -1 9.86 10.01
 -11 8 -1 36.59 19.78
 -11 -8 1 4.55 7.88
 -11 8 1 32.81 15.52
 -11 -8 -1 -3.76 18.8
 11 8 -1 32.28 28.6
 11 8 -1 21.97 11.75
 11 8 1 14.6 13.4
 11 8 1 31.78 13.18
 -11 8 -1 40.41 30.1
 11 -8 -1 41.6 25.96
 -11 -8 -1 2.75 11.12
 -11 8 -1 -31.66 24.09
 -11 8 -1 19.68 11.47
 11 8 1 46.08 29.16
 11 8 -1 22.84 11.18
 -11 8 1 40.74 18.18
 11 8 1 23.28 12.75
 11 -8 1 16.09 14.87
 11 8 -1 24.05 10.89
 -11 8 1 23.37 16.17
 11 8 1 16.82 11.26
 11 8 -1 18.52 9.16
 -11 8 1 36.62 27.79
 -11 -8 -1 25.38 17.15
 11 8 -1 27.8 23.58
 11 8 -1 27.15 13.01
 -11 -8 1 5.59 4.32
 11 8 1 20.23 10.24
 -11 8 1 37.31 18.21
 12 8 1 54.98 16.5
 12 8 -1 93.38 24.17
 12 8 1 59.64 30.29
 12 8 1 69.73 25.61
 -12 8 1 74.38 24.26
 12 8 -1 72.19 33.24
 12 8 1 57.57 29.82
 -12 -8 1 67.93 33.82
 12 8 1 75.98 23.44
 -12 8 -1 92.81 24.36
 12 8 -1 107.11 26.34
 -12 -8 -1 32.08 19.15
 -12 8 1 72.92 22.34
 12 8 1 57.03 22.14
 -12 -8 1 34.95 13.31
 12 8 -1 80.98 22.18
 -12 -8 -1 77.84 35.62
 -12 -8 1 25.91 18.23
 -12 8 -1 25.66 24.28
 -12 8 1 58.37 31.31
 12 8 -1 90.91 28.51
 12 -8 -1 60.76 35.41
 -12 8 -1 96.4 45.04
 -12 -8 -1 67.6 31.83
 -12 8 -1 68.13 25.3
 12 8 -1 103.05 41.58
 12 -8 1 33.47 10.35
 -12 8 1 87.01 30.55
 12 8 -1 78.73 25.22
 -12 8 1 59.34 19.77
 12 8 -1 94.35 23.96
 12 -8 -1 40.02 31.24
 13 8 1 -37 24.07
 13 -8 -1 28.99 22.6
 -13 -8 -1 48.51 30.65
 13 8 -1 -18.7 17.24
 13 -8 1 6.62 12.23
 -13 8 -1 -9.77 14.1
 -13 -8 -1 3.12 16.54
 -13 8 1 2.21 17.47
 13 8 1 10.08 7.33
 -13 -8 -1 7.01 15.76
 13 8 -1 6.09 2.21
 13 8 -1 5.74 5.34
 -13 -8 1 35.29 23.25
 13 8 1 2.32 3.2
 13 8 1 11.13 8.42
 13 8 -1 -0.02 4.62
 -13 8 -1 8.72 10.35
 13 8 -1 8.96 11.39
 -13 8 1 0.14 13.74
 13 -8 -1 2.15 9.89
 13 8 1 1.37 10.55
 -13 8 1 6.56 7.91
 -13 -8 1 -5.66 10.14
 -13 8 1 -2.16 3.6
 13 8 1 2.76 6.86
 13 8 -1 1.08 8.57
 -13 -8 1 -6.99 6.95
 -13 8 1 3.86 2.34
 13 8 1 10.56 7.12
 -13 8 1 -3.49 9.1
 -13 8 -1 16.03 12.93
 13 8 -1 6.85 6.14
 -13 8 -1 1.75 5.75
 -14 -8 -1 3.88 9.18
 14 8 -1 -10 10.39
 -14 -8 1 14.22 10.47
 14 8 -1 1.91 3.47
 -14 8 1 7.41 8.43
 14 8 1 13.81 12.6
 14 8 -1 18.83 12.69
 14 8 -1 0.75 5.36
 14 8 -1 2.9 11.34
 -14 8 -1 11.57 7.64
 14 8 1 -11.09 13.47
 14 8 1 15.23 11.64
 14 8 1 7.88 4.76
 14 8 1 2.96 10.6
 -14 8 1 1.04 8.48
 -14 8 1 0.17 6.03
 -14 8 -1 9.42 7.57
 -14 8 1 3.94 8.27
 14 8 1 7.3 3.25
 14 8 1 -3.6 6.13
 -14 8 -1 14.43 12.6
 -14 8 1 -29.14 13.85
 14 8 -1 -2.23 11.43
 -15 8 -1 13.31 11.72
 -15 8 1 17.91 11.94
 -15 8 -1 11.81 11.03
 15 8 1 30.69 17.42
 15 8 1 6.93 6.29
 15 8 1 19.49 12.32
 -15 8 1 16.4 8.35
 -15 8 1 15.02 12.38
 -15 -8 1 6.18 4.12
 -15 -8 -1 10.5 6.88
 15 8 -1 7.67 7.53
 15 8 -1 16.73 11.3
 15 8 -1 19.56 10.58
 15 8 1 -4.45 10.95
 15 8 1 11.26 10.54
 -15 8 -1 26.81 13.29
 15 8 1 19.92 8.85
 15 8 -1 15.01 9.72
 -15 8 1 6.78 2.91
 15 8 1 15.7 8.66
 15 8 -1 29.52 13.46
 -15 8 1 20.95 14.34
 -15 -8 -1 8.84 5.86
 15 8 -1 11.67 10.62
 16 8 -1 29.63 15.86
 16 8 1 24.39 14.05
 -16 8 -1 11.91 13.4
 -16 8 -1 18.04 13.17
 16 8 1 20.69 13.21
 16 8 1 38.2 17.25
 -16 8 1 25 14.72
 -16 8 1 20.75 15.39
 -16 8 -1 18.86 13.35
 -16 -8 -1 12.59 6.31
 -16 -8 -1 5.71 5.48
 -16 8 1 40.42 17.19
 16 8 -1 48.04 18.31
 -16 8 1 24.86 16.11
 16 8 -1 13.71 7.81
 16 8 1 18.16 11.5
 16 8 -1 35.96 19.93
 16 8 -1 26.4 12.39
 16 8 1 24.78 13.32
 -16 -8 1 19.65 8.7
 16 8 1 18.72 9.58
 -16 8 1 24.84 12.56
 16 8 -1 36.42 16.14
 -17 -8 1 73.35 24.08
 17 8 1 54.99 17.65
 -17 8 -1 74.85 23.47
 17 8 -1 105.92 26.76
 17 8 -1 135.92 31.47
 17 8 1 90.19 24.22
 17 8 -1 122.18 28.28
 17 8 -1 125.31 30.13
 17 8 1 76.28 24.61
 -17 8 -1 90.87 26.04
 17 8 1 79.66 24.5
 -17 8 1 87.46 26.88
 -17 8 1 100.29 27.27
 -17 8 1 119.97 32.12
 -17 -8 -1 67.78 21.72
 -17 -8 -1 77.45 23.35
 -17 -8 1 105.67 26.26
 17 8 -1 113.83 33.83
 -17 8 1 110.63 34.24
 17 8 1 97.72 29.46
 17 8 -1 82.2 26.33
 -17 8 -1 78.58 26.8
 17 8 1 92.92 26.46
 -17 -8 1 69.65 22.63
 18 8 1 178.38 35.08
 18 8 -1 224.76 40.87
 18 8 -1 212.53 38.94
 18 8 1 171.68 34.91
 18 8 -1 269.55 43.88
 -18 8 1 203.82 41.04
 -18 8 1 248.87 48.02
 18 8 1 180.25 39.24
 18 8 1 166.98 32.81
 18 8 1 139.34 36.2
 -18 8 1 180.84 35.35
 18 8 -1 223.86 40.48
 -18 8 -1 159.79 35.18
 -18 -8 -1 159.39 34.9
 18 8 -1 274.37 53.7
 -18 8 -1 165.84 35.1
 -18 8 -1 161.32 40.54
 18 8 1 189.67 41.87
 -18 8 1 206.6 49.73
 -18 -8 -1 169.35 36.06
 -18 -8 1 269.25 40.32
 -18 -8 1 167.2 34.89
 -18 -8 1 147.64 34.58
 18 8 -1 236.18 45.15
 -19 -8 1 44.67 19.12
 -19 8 -1 52.4 19.25
 -19 -8 1 51.28 18.89
 19 8 -1 102.3 29.32
 19 8 -1 69.35 24.08
 -19 -8 1 76.22 21.94
 -19 8 1 63.17 23.03
 -19 8 1 82.79 28.7
 -19 8 -1 50.34 21.21
 19 8 -1 76.3 24.16
 19 8 1 70.54 21.76
 19 8 1 54.71 17.88
 -19 8 1 71.48 26.14
 -19 -8 -1 29.31 14.67
 19 8 -1 74.22 28.92
 19 8 1 37.74 17.59
 -19 8 -1 33.2 13.22
 19 8 1 44.27 21.16
 -19 8 1 55.5 20.13
 19 8 -1 76.76 23.68
 19 8 1 44.54 19.8
 -19 -8 -1 49.65 20.11
 -20 -8 -1 83.53 26.78
 -20 8 1 97.15 32.73
 -20 8 -1 117.68 30.5
 -20 -8 1 141.63 29.73
 -20 -8 -1 65.6 22.19
 20 8 1 81.01 22.99
 -20 8 -1 96.62 32.88
 20 8 -1 131.32 37.4
 20 8 1 70.76 27.64
 20 8 -1 130.25 30.74
 20 8 -1 111.91 28
 -20 8 1 129.74 30.65
 20 8 1 87.09 25.83
 -20 8 1 108.14 26.7
 20 8 1 102.58 26.42
 -20 8 -1 100.06 25.61
 -20 -8 1 102.2 28.46
 20 8 -1 162.55 33.89
 20 8 1 59.19 21.48
 -20 8 1 142.92 36.5
 20 8 -1 143.5 34.53
 -20 -8 1 88.24 25.39
 -20 -8 -1 70.96 18.47
 -21 -8 1 -4.52 7.97
 -21 -8 -1 -24.49 11.29
 -21 8 1 -11.28 15.24
 -21 -8 -1 -1.66 3.72
 -21 8 -1 2.23 6.69
 -21 8 -1 0.85 3.73
 21 8 1 -0.24 7.75
 21 8 1 2.42 2.77
 -21 8 1 3.92 7.06
 21 8 -1 2.15 6.36
 21 8 1 8.75 15.37
 21 8 1 7.69 7.67
 -21 8 1 2.1 3.26
 21 8 -1 -3.13 8.77
 -21 8 1 -5.72 7.61
 21 8 -1 1.43 11.42
 -21 -8 1 5.33 8.25
 21 8 -1 -1.74 6.59
 -21 -8 -1 2.22 5.04
 -21 -8 -1 -5.58 8.41
 -21 -8 1 -6.55 9.28
 21 8 1 4.71 9.12
 -22 8 1 120.35 32.37
 -22 -8 -1 15.92 8.22
 22 -8 -1 49.07 18.64
 -22 8 1 121.05 27.58
 22 8 -1 102.21 27.61
 22 8 1 72.58 23.19
 -22 8 -1 96.08 25.37
 22 8 1 85.67 21.62
 -22 -8 1 83.23 25.39
 22 8 1 55.88 21.38
 22 8 1 76.2 21.9
 -22 8 -1 88.32 27.61
 22 8 -1 95.32 26.41
 22 8 -1 101.35 31.85
 -22 8 1 127.48 31.53
 -22 8 1 104.82 33.03
 -22 -8 1 132.55 27.61
 22 8 1 69.52 22.82
 -22 -8 -1 68.88 23.57
 -22 -8 -1 55.48 16.7
 -22 -8 1 85.12 26.64
 22 8 -1 140.01 31.8
 -22 -8 -1 66.5 21.98
 -23 -8 -1 12.66 7.69
 23 -8 -1 13.05 6.48
 23 8 1 9.06 7.71
 23 8 1 5.72 3.57
 23 8 -1 10.09 5.51
 -23 8 -1 16.7 15.98
 -23 8 -1 15.25 12.18
 23 8 -1 11.72 6.7
 -23 8 1 15.38 8.95
 23 8 1 -6.03 14.52
 23 8 -1 9.34 6.34
 23 8 1 6.1 2.68
 -23 -8 -1 11.98 7.38
 -23 -8 -1 5.25 10.88
 -23 -8 1 44.33 19.42
 -23 -8 -1 16.28 11.5
 -23 8 1 25.5 16.34
 -23 -8 1 20.41 12.14
 -23 -8 1 27.96 13.17
 23 8 -1 19.84 9.45
 23 8 1 12.25 6.17
 -24 -8 1 32.2 18.13
 -24 -8 1 24.68 13.68
 -24 8 -1 18.6 13.75
 24 8 -1 29.11 14.91
 -24 -8 1 30.94 15.65
 24 8 1 31.06 14.4
 -24 8 -1 21.73 12.79
 24 -8 -1 8.93 2.39
 24 8 -1 -0.9 6.14
 -24 -8 -1 14.62 8.88
 -24 -8 -1 0.25 3.68
 24 8 -1 20.58 10.43
 24 8 -1 11.61 8.72
 -24 8 1 24.57 13.28
 -24 8 1 27.15 13.24
 24 8 1 33.31 14.91
 24 8 1 10.88 6.08
 -24 -8 1 26.78 10.51
 24 8 1 10.23 8.68
 -24 -8 -1 6.49 4.96
 24 8 1 -2.41 7.64
 -25 -8 1 10.05 8.35
 -25 8 -1 5.43 9.47
 -25 -8 1 14.75 7.9
 25 8 -1 3.77 9.01
 25 8 1 15.41 8.72
 -25 -8 -1 12.51 11.12
 -25 -8 -1 6.43 4.89
 -25 -8 1 5.72 8.05
 -25 8 1 11.48 8.84
 25 8 1 17.59 13.03
 -25 8 1 9.79 9.75
 25 8 -1 7.27 9.12
 25 8 1 6.25 9.39
 25 -8 -1 -5.96 7.99
 25 8 1 5.59 3.67
 25 8 1 1.26 5.59
 -25 -8 -1 8.2 4.02
 -25 8 -1 14.98 13.05
 -25 -8 1 13.21 9.85
 25 8 -1 8.35 4.68
 25 8 1 10.05 8.84
 -26 -8 1 55.76 19.22
 26 -8 -1 39.56 13.72
 26 8 1 24.9 10.77
 26 8 1 21.51 9.47
 26 8 1 39.05 14.55
 -26 8 -1 70.09 20.15
 -26 -8 -1 41.99 15.97
 -26 8 1 82.83 19.45
 -26 -8 -1 29.72 12.89
 26 8 -1 33.74 19.39
 -26 -8 1 49.36 14.63
 26 8 1 21.26 8.77
 26 8 -1 48.64 18.09
 -26 -8 1 49.12 16.69
 26 8 -1 51.86 16.44
 -26 -8 -1 52.42 17.14
 26 8 1 13.3 7.23
 -27 -8 1 -5.87 6.4
 -27 -8 -1 4.1 5.54
 27 8 1 -6.98 7.93
 27 8 1 -6.08 11.42
 27 8 -1 8.57 10.2
 -27 -8 1 6.97 6.13
 27 8 1 -4 4.89
 -27 -8 1 3.64 5.32
 27 8 1 -0.53 5.02
 27 -8 1 -1.54 4.21
 27 -8 -1 -3.26 2.58
 -27 8 1 -5.17 7.34
 -27 8 -1 6.28 5.27
 27 8 -1 8.45 9.32
 -27 -8 -1 -1.79 5
 -27 -8 -1 2.89 6.78
 27 8 1 -0.28 2.37
 -28 -8 -1 75.2 19.54
 28 -8 -1 37.68 11.89
 28 8 1 17.92 6.87
 -28 8 -1 96.17 20.22
 -28 -8 -1 82.38 18.12
 -28 -8 1 74.65 17.8
 28 -8 1 11.67 6.1
 28 8 -1 40.09 15.44
 28 8 1 48.63 17.76
 28 8 -1 25.04 10.79
 0 9 1 -60.51 29.82
 0 9 1 -0.14 7.62
 0 -9 -1 -3.37 18.65
 0 9 1 0.81 3.9
 0 9 -1 31.82 30.1
 0 -9 1 -38.61 25.42
 -1 -9 1 46.62 25.49
 1 9 -1 79.76 38.27
 1 9 1 65.06 31.67
 -1 9 1 89.2 39.72
 -1 9 1 78.35 36.48
 -1 9 -1 97.52 42.81
 -1 -9 -1 95.81 35.6
 1 9 1 74.94 35.62
 1 -9 -1 69.52 33.75
 -1 9 1 48.49 25.13
 1 -9 -1 88.02 34.63
 1 -9 1 57.01 30.73
 1 9 1 45.09 26.45
 1 9 1 122.7 41.41
 -2 9 -1 150.43 53.07
 -2 9 1 87.31 41.78
 2 -9 -1 158.93 47.26
 2 -9 -1 81.27 29.68
 -2 -9 -1 168 50.95
 -2 9 1 86.07 37.08
 -2 -9 1 61.84 34.74
 -2 9 1 77.88 35.3
 2 9 1 134.08 40.64
 2 -9 1 76.2 36.31
 2 9 -1 146.37 50.14
 2 9 1 120.27 43.58
 2 9 1 97.82 38.73
 2 9 1 108 38.7
 3 9 1 11.61 10.32
 3 9 -1 26.52 22.34
 -3 -9 -1 12.79 10.68
 3 -9 1 12.95 14.35
 3 9 1 5.64 5.34
 3 -9 1 -29.35 21.97
 3 -9 -1 15.25 11.2
 3 9 1 20.61 13.96
 3 -9 -1 6 16.61
 -3 -9 1 9.93 8.5
 -3 9 1 2 5.79
 -3 9 -1 0.1 13.29
 -3 9 1 14.88 21.71
 4 9 1 77.04 35.48
 -4 9 1 57.32 33.91
 -4 9 1 45.81 28.7
 4 -9 1 47 26.62
 -4 -9 1 38.05 26.82
 4 -9 -1 73.55 29
 4 9 -1 84.7 36.28
 -4 9 -1 119.5 44.85
 4 -9 -1 86.32 39.4
 4 9 1 32.21 22.3
 4 9 1 84.16 33.25
 4 -9 1 12.1 14.67
 -4 -9 -1 89.78 36.51
 -5 9 1 6.18 12.15
 -5 -9 1 26.56 21.47
 5 9 1 42.93 25.14
 -5 9 -1 21.05 25.34
 5 -9 -1 10.99 12.81
 5 -9 1 83.83 34.6
 5 9 -1 42.45 28.07
 5 9 1 31.44 23.64
 -5 -9 -1 31.07 27
 -5 9 1 35.97 24.79
 5 9 1 13.92 17.12
 6 -9 1 24.35 6.95
 -6 -9 1 30.09 20.76
 6 -9 -1 86.56 38.38
 -6 -9 -1 40.63 21.54
 6 9 1 84.99 39.35
 -6 9 1 47.67 27.41
 6 9 1 45.17 18.07
 6 9 -1 32.77 16.12
 6 9 1 43.43 13.11
 6 9 -1 62.65 19.47
 -6 9 1 78.38 24.52
 -6 9 1 61.09 18.58
 6 9 -1 55.24 21.19
 -6 9 1 76.34 38.49
 6 9 -1 37.85 22.82
 6 9 1 17.2 26.01
 6 9 1 57.63 29.43
 -6 -9 -1 25.16 24.44
 -6 9 -1 78.59 40.58
 -7 9 1 15.01 8.97
 -7 -9 -1 22.47 22.74
 7 9 -1 -4.59 9.79
 7 9 -1 48.56 26.19
 7 9 -1 14.04 10.09
 7 9 -1 14.44 8.05
 7 9 1 8.7 6.17
 -7 9 1 -0.05 19.96
 7 -9 -1 12.45 13.37
 -7 9 1 25.31 13.42
 7 9 1 23.22 13.42
 7 9 1 11.31 6.29
 -7 9 1 19.6 15.33
 7 9 -1 22.6 11.19
 7 9 1 15.57 11.21
 7 -9 1 12.45 15.03
 7 9 1 37.86 28.75
 -7 -9 -1 17.88 13.72
 7 9 -1 0.78 15.19
 7 9 -1 12.31 3.77
 -7 -9 1 14.86 21.16
 7 9 1 13.68 9.61
 -7 9 -1 15.96 16.51
 7 9 1 -11.76 16.15
 -7 9 -1 20.19 10.37
 -7 9 1 11.98 6.55
 8 9 1 107.53 31.73
 8 -9 1 106.33 38.65
 -8 9 1 113.8 28.34
 -8 9 1 207.98 41.12
 8 9 -1 192.14 35.18
 8 9 -1 113.03 38.95
 8 9 -1 200.17 37.3
 8 9 1 196.08 33.44
 -8 9 1 116.7 46.45
 8 -9 -1 219.44 58.41
 8 9 1 167.66 36.58
 8 9 -1 164.75 33.89
 -8 -9 -1 235.4 60.51
 -8 -9 -1 85.31 37.7
 8 9 1 215.6 58.72
 -8 -9 1 153.89 53.14
 8 9 1 154.97 34.1
 -8 9 1 215.99 46.72
 8 9 1 178.01 54.06
 8 9 1 124.48 29.79
 -8 9 -1 202.2 36.58
 -8 9 -1 197.21 36.38
 -8 9 1 184.29 58.28
 8 9 1 143.92 30.09
 -8 9 1 210.26 37.21
 -8 9 -1 170 39.59
 8 9 -1 220.87 36.26
 8 9 -1 183.77 56.06
 8 9 -1 173.9 40.4
 8 9 -1 158.6 34.48
 -8 9 -1 160.09 57.83
 9 9 1 82.47 21.5
 9 -9 -1 110.16 46.11
 9 9 1 93.64 38.59
 9 -9 1 48.63 25.56
 9 9 -1 98.26 37.05
 -9 9 -1 111 28.22
 -9 9 -1 124.83 29.27
 -9 -9 -1 65.44 30.41
 -9 9 -1 58.69 35.97
 9 9 1 110.53 30.4
 9 9 -1 97.5 24.4
 -9 9 1 98.59 30.29
 -9 9 1 101.25 25.87
 9 9 1 107.65 28.35
 9 9 1 88.47 36.22
 9 9 1 75.63 23.48
 9 9 -1 101 26.25
 -9 -9 1 52.52 31.09
 9 9 -1 91.58 29.57
 9 9 -1 94.82 39.75
 -9 9 1 89.97 25.68
 9 9 -1 104.45 27.77
 -9 9 -1 81.4 25.77
 -9 -9 -1 68.57 35.32
 9 9 1 98.36 23.89
 -9 9 1 80 38.6
 9 9 1 75.49 26.15
 9 9 -1 117.25 27.87
 9 9 -1 130.22 28.71
 10 9 -1 270.57 42.37
 -10 9 1 238.97 46.09
 10 9 1 210.59 36.76
 -10 9 1 213.4 37.91
 10 9 -1 192.84 57.53
 10 9 -1 241.24 40.43
 -10 9 -1 232.29 40.68
 10 9 1 167.38 36.54
 10 9 -1 113.06 40.21
 10 9 -1 199.83 36.08
 10 9 1 159.91 35.63
 -10 9 -1 160.92 58.57
 -10 9 1 270.12 54.83
 10 9 -1 240.46 48.73
 10 9 1 182.79 38.79
 -10 -9 -1 180.29 55.39
 -10 -9 1 93.42 39.8
 -10 9 1 179.89 58.66
 10 9 -1 245.74 38.46
 10 9 -1 283.94 43.15
 -10 -9 -1 73.88 38.18
 -10 9 -1 188.54 42.81
 10 -9 -1 195.4 58.44
 10 9 1 218.15 38.83
 -10 9 -1 196.83 35.92
 10 9 1 242.67 64.44
 10 -9 1 102.82 45.43
 11 9 -1 13.47 11.72
 11 9 1 17.23 10.5
 -11 9 1 21.25 13.96
 -11 9 -1 15.28 13.86
 11 9 1 27.5 17.86
 11 9 -1 18.42 9.98
 -11 9 1 30.98 17.25
 11 9 -1 32.1 15.29
 11 9 -1 25.23 11.8
 -11 9 -1 8.06 2.41
 11 9 1 26.48 15
 11 9 1 5.27 4.19
 11 9 1 26.93 17.65
 -11 9 1 26.2 20.55
 11 9 -1 35.42 16.15
 -11 -9 -1 13.9 16.94
 12 9 -1 130.22 28.82
 12 9 1 94.33 24.84
 -12 9 1 121.58 29.71
 12 9 1 129.7 33.31
 12 9 -1 147.83 30.85
 -12 9 1 121.32 37.79
 12 9 -1 140.33 31.73
 -12 9 -1 112.22 28.67
 12 9 1 110.97 28.69
 -12 9 1 106.64 31.07
 -12 9 -1 102.6 33.39
 12 9 -1 136.06 33.44
 12 9 1 104.18 29.08
 12 9 -1 159.96 31.57
 -13 -9 1 13.39 6.64
 13 9 -1 4.5 7.79
 13 9 1 -0.18 8.29
 -13 9 -1 13.73 9.13
 -13 9 1 27.37 14.06
 13 9 -1 5.31 7.76
 13 9 -1 7.94 10.27
 13 9 1 10.77 10.71
 -13 9 1 14.33 9.58
 13 9 1 16.51 8.22
 13 9 -1 21.5 13.25
 13 9 -1 6.56 11.23
 13 9 -1 18.43 12.04
 -13 9 1 12.08 10.66
 -13 9 -1 9.38 5.18
 14 9 1 -2.31 6.17
 14 9 -1 14.17 6.48
 -14 9 1 11.63 9.76
 -14 -9 -1 -15.38 13.52
 -14 9 -1 -7.11 14.16
 -14 -9 1 5.73 5.03
 14 9 -1 -1.01 10.3
 14 9 -1 -2.18 7.45
 14 9 -1 9.82 9.6
 14 9 -1 -1.14 4.21
 -14 9 1 5.95 4.47
 14 9 1 1.39 6.24
 -14 9 1 -7.98 7.41
 -14 9 1 -14.42 15.46
 14 9 1 8.43 7.75
 -14 9 -1 -10.39 9.5
 14 9 -1 -5.71 10.95
 -15 9 1 40.63 17.7
 15 9 -1 78.14 23.67
 15 9 -1 73.01 24.61
 -15 -9 -1 35.06 13.78
 -15 9 -1 66.74 21.19
 15 9 -1 88.72 25.17
 -15 9 1 66.45 21.36
 15 9 1 58.55 20.76
 15 9 1 51.52 18.28
 -15 9 1 46.71 17.86
 15 9 -1 68.79 21.16
 15 9 1 58.11 19.58
 15 9 1 43.47 16.29
 -15 -9 -1 22.99 9.81
 15 9 -1 70.06 22.06
 -15 9 1 42.89 24.07
 -15 9 -1 47.56 22.77
 -15 -9 1 39.92 16.65
 15 9 -1 55.49 21.03
 16 9 -1 261.43 48.6
 -16 -9 -1 91.04 25.91
 16 9 -1 239.51 40.99
 16 9 1 160.82 38.28
 16 9 1 172.5 36.75
 -16 9 1 199.97 38.4
 16 9 1 142.72 33.74
 -16 -9 1 141.1 32.1
 -16 9 1 215.79 44.89
 -16 9 1 173.65 42.6
 -16 9 -1 164.25 35.55
 -16 9 -1 160.67 41.09
 16 9 1 165.57 36.42
 16 9 1 114.33 29.69
 16 9 -1 248.74 41.4
 16 9 1 196.58 37.67
 16 9 -1 225.79 39.12
 -16 -9 1 133.73 29.09
 16 9 -1 214.58 39.42
 -16 -9 -1 133.52 29.5
 16 9 -1 219.87 42.76
 -17 9 -1 2.75 11.11
 17 9 -1 -1.33 8.38
 17 9 -1 8.44 6.92
 -17 -9 -1 6.09 9.32
 17 9 1 -0.59 8.82
 -17 9 1 -1.82 8.09
 -17 9 -1 -3.12 9.4
 -17 -9 -1 1.91 3.23
 17 9 -1 8.01 9.5
 17 9 -1 5.88 9.69
 17 9 -1 -9.48 10.28
 -17 9 1 14.22 13.37
 17 9 1 3.65 3.64
 17 9 1 1.28 8.99
 17 9 1 0.15 9.05
 -17 9 1 9.89 12.11
 17 9 -1 0.31 6.52
 17 9 1 -5.43 12.29
 -17 -9 1 4.44 4.62
 -17 -9 1 11.47 10.37
 17 9 1 -23.02 12.77
 -18 -9 1 164.79 35.29
 18 9 1 225.94 39.12
 -18 9 1 257.95 43.05
 18 9 1 268.32 50
 18 9 -1 320.45 47.49
 -18 9 1 302.08 51.67
 18 9 1 174.68 36.62
 18 9 -1 353.48 58.41
 -18 -9 -1 201.25 37.59
 18 9 1 219.57 41.08
 18 9 -1 310.96 46.15
 18 9 1 263.03 43.22
 18 9 -1 346.4 48.88
 -18 9 1 270.09 56.25
 -18 9 -1 197.6 47.63
 -18 9 -1 247.31 43.4
 -18 -9 1 254.52 41.42
 -18 -9 -1 170.97 34.6
 18 9 -1 292.16 48.36
 18 9 1 222.23 43.05
 18 9 -1 286.73 46
 -18 -9 1 230.9 41.25
 -19 -9 1 -12.27 10.22
 -19 9 1 -2.66 7.75
 19 9 1 4.82 3.57
 19 9 -1 -7.06 6.69
 19 9 1 8.36 11.35
 -19 9 -1 1.08 7.55
 19 9 -1 0.6 5.62
 19 9 -1 -23.61 12.79
 -19 -9 -1 13.36 10.06
 -19 -9 1 9.37 8.78
 -19 -9 1 6.26 7.77
 19 9 1 7.8 15.73
 19 9 1 -8.78 9.9
 -19 9 1 -3.76 10.21
 19 9 1 -0.26 9.94
 19 9 -1 2.28 5.69
 19 9 1 -2.32 4.47
 -19 -9 -1 -1.16 6.69
 19 9 -1 -11.07 11.43
 -19 9 -1 -1.96 3.68
 -19 9 1 12.12 15.48
 20 9 1 124.22 30.77
 -20 9 -1 140.17 32.93
 20 9 1 79.82 23.7
 20 9 1 138.86 28.24
 -20 9 1 127.51 34.45
 -20 -9 1 89.46 26.29
 20 9 -1 169.44 35.49
 20 9 -1 173.55 41.82
 -20 -9 -1 83.55 22.64
 -20 9 1 153.04 37.09
 20 9 1 67.24 17.35
 20 9 -1 194.03 37.09
 -20 -9 -1 103.29 28.45
 -20 9 1 139.44 30.93
 20 9 1 98.35 27.56
 -20 -9 1 125.59 29.14
 -20 -9 -1 55.52 20.12
 -20 -9 1 129.91 32.19
 20 9 -1 168.95 36.08
 -20 -9 -1 72.56 22.23
 -20 9 -1 136.74 37.14
 -21 -9 -1 -4.16 6.68
 -21 9 1 -3.56 10.68
 -21 -9 -1 4.38 8.35
 -21 9 1 1.64 4.86
 21 9 1 5.07 5.43
 21 9 1 12.83 10.1
 21 9 -1 -2.86 2.69
 21 9 -1 -3.19 8.35
 21 9 -1 5.43 2.43
 21 9 1 -0.64 3
 21 9 1 -2 1.88
 21 9 -1 0.56 5.98
 -21 9 1 0.27 6.79
 -21 9 -1 3.59 8.29
 -21 -9 1 -12.91 7.26
 -21 -9 1 0.36 4.57
 -21 -9 -1 9.69 8.5
 -21 9 -1 9.05 3.67
 -21 -9 -1 -21.74 17.55
 -21 -9 1 5.4 7.72
 21 9 1 -2.86 10.29
 -22 -9 -1 35.66 14.34
 22 9 -1 80.34 24.54
 22 9 1 35.96 17.04
 -22 -9 -1 35.53 13.88
 22 9 -1 98.88 25.78
 22 9 -1 72.58 22.28
 22 9 1 35.05 15.72
 -22 9 1 68.12 20.75
 22 9 1 42.79 18.2
 -22 9 -1 72.94 23.59
 -22 9 1 64.6 19.38
 -22 -9 1 71.3 19.07
 22 9 -1 76.56 25.72
 -22 -9 1 52.76 21.01
 -22 9 -1 57.42 24.45
 22 9 1 37.66 15.98
 -22 -9 1 33.71 17.95
 -22 -9 -1 48.29 17.95
 22 9 1 64.25 16.94
 -22 -9 -1 33.43 11.42
 23 9 1 11.01 8.8
 -23 9 -1 3.89 5.34
 23 9 -1 -0.32 3.61
 -23 -9 -1 -0.46 2.28
 23 9 1 1.87 4.32
 23 9 -1 19.77 10.81
 -23 -9 1 -1.39 6.27
 23 9 -1 1.74 5.67
 -23 -9 1 6.16 7.08
 -23 9 1 19.13 9.97
 -23 -9 -1 14.51 10.63
 23 9 1 -12.31 14.09
 -23 9 -1 -11.77 12.92
 23 9 1 0.64 9.29
 -23 9 1 14.62 10.63
 23 9 1 -18.98 16.54
 -23 -9 1 6.91 2.97
 23 9 -1 6.7 7.3
 -23 -9 -1 15.55 7.39
 -23 -9 -1 3.83 8.18
 23 9 1 1.52 10.44
 -24 -9 -1 3.91 5.94
 -24 9 1 18.14 10.24
 -24 -9 -1 -2.78 5.81
 24 9 -1 9.73 7.77
 24 9 1 -8.37 9.05
 24 9 1 -5.03 6.81
 -24 9 -1 26.69 14
 -24 9 -1 13.56 8.69
 24 9 1 13.79 13.51
 -24 -9 1 21.2 12.77
 -24 9 1 23.8 13.16
 -24 -9 1 7.48 7
 24 9 1 1.19 3.85
 -24 -9 -1 12.76 10.21
 24 9 -1 19.14 11.03
 -24 -9 1 -0.49 4.89
 -24 -9 1 14.31 5.72
 24 9 1 5.17 4.85
 -24 -9 -1 13.62 8.69
 24 9 1 31.67 15.93
 24 9 -1 1.79 3.24
 -25 -9 1 -2.07 5.38
 -25 -9 1 15.85 8.51
 -25 9 -1 10.42 6.93
 25 9 1 8.18 4.24
 -25 -9 1 0.76 4.76
 -25 -9 -1 -3.88 8.88
 25 -9 -1 30.23 11.9
 -25 9 1 20.49 9.67
 25 9 1 12.08 7.36
 25 9 -1 21.37 11.61
 -25 -9 -1 10.45 3.1
 25 9 1 19.19 9.28
 -25 -9 -1 27.08 13.91
 25 9 1 14.89 7.43
 25 9 1 -2.11 4.2
 25 9 1 23.45 12.04
 -25 9 -1 19.69 11.25
 25 9 -1 19.99 10.7
 -25 -9 1 19.73 12.36
 -26 9 -1 2.59 4.91
 -26 -9 -1 -1.58 6.29
 -26 9 1 6.28 5.49
 26 9 1 9.1 9.22
 26 9 -1 6.32 6.65
 26 9 1 22.31 14.94
 26 -9 1 -4.82 8.01
 26 9 1 2.53 5.94
 -26 -9 -1 3.58 5.84
 -26 -9 1 14.01 8.41
 -26 -9 -1 13.11 9.63
 26 9 -1 8.3 7.82
 26 -9 -1 -6.18 6.07
 -26 -9 1 0.9 4.72
 -26 -9 1 -6.99 6.67
 26 9 1 0.98 6.84
 -27 -9 -1 18.79 9.5
 27 -9 -1 7.38 4.22
 -27 9 -1 22.84 10.39
 27 9 -1 4.09 2.7
 27 9 -1 22.33 12.51
 -27 -9 1 16.77 8.32
 0 10 -1 -20.12 11.62
 0 10 -1 -2.22 7.39
 0 10 1 -2.45 25.74
 0 10 1 -42.09 26.68
 0 10 -1 -6.3 12.25
 0 10 1 3.23 14.17
 0 -10 -1 -49.19 28.31
 0 10 1 -1.58 2.94
 0 10 1 7.08 8.42
 0 10 1 -3.37 9.9
 0 10 1 -7.2 10.95
 0 10 1 -2.8 4.53
 0 -10 1 -43.96 28.5
 0 10 -1 48.23 33.07
 0 10 -1 -1.89 6.01
 1 10 -1 23.64 13.66
 1 10 -1 15.64 7.91
 1 10 -1 13.78 11.02
 1 10 -1 12.69 15.78
 -1 10 1 9.55 9.49
 1 10 1 9.76 8.49
 1 10 -1 3.36 4.41
 1 10 1 11.37 9.64
 1 10 1 -27.16 21.03
 -1 -10 -1 13.98 12.67
 1 -10 1 15.68 19.78
 1 10 1 -47.17 28.31
 -1 -10 1 -1.92 17.53
 -1 10 1 10.55 6.66
 -1 10 -1 -41.89 28.84
 1 10 1 15.37 10.86
 -1 10 -1 2.17 6.67
 1 10 1 -19.95 19.34
 -1 10 -1 9.02 9.62
 -1 10 1 12.48 9.33
 -1 10 1 5.69 2.57
 -1 10 1 42.95 35.61
 1 10 1 -6.25 8.41
 1 -10 -1 4.69 19.65
 -1 10 -1 1.56 3.37
 -1 10 1 -1.61 11.62
 -1 10 -1 3.13 5.44
 -1 10 1 9.23 7.83
 1 10 1 9.04 9.12
 -2 10 -1 36.56 18.16
 2 10 1 38.07 15.57
 -2 10 1 34.77 17.39
 -2 10 -1 49.1 16.78
 2 -10 1 86.61 40.21
 -2 10 -1 53.12 19.14
 2 10 -1 42.97 16.6
 2 10 -1 51.61 22.67
 2 10 -1 22.6 9.07
 2 10 -1 38.07 16.86
 2 -10 -1 29.5 14.67
 2 -10 1 15.06 16.66
 -2 10 1 43.58 17.31
 -2 10 -1 48.35 22.02
 2 10 -1 43.33 28.72
 2 10 1 -52.99 29.9
 2 10 1 44.22 17.95
 -2 10 1 51.01 27.9
 -2 -10 1 20.02 19.64
 2 10 1 13 10.41
 -2 10 -1 57.14 29.76
 2 10 1 27.52 14.37
 2 10 1 45.09 16.34
 -2 10 1 53.33 19.58
 2 10 1 44.9 16.43
 -2 10 1 58.55 30.31
 2 10 -1 37.83 20.03
 -2 -10 -1 52.9 30.93
 3 10 -1 44.45 21.5
 3 10 1 35.5 13.66
 -3 10 -1 25.72 11.43
 3 10 1 39.44 29.46
 -3 -10 -1 21.84 6.23
 -3 10 -1 8.03 4.55
 -3 10 1 27.14 13.92
 3 -10 1 66.4 34.44
 3 10 1 18.33 12.26
 -3 10 -1 45.55 36.2
 -3 10 -1 24.8 14
 3 10 -1 20.16 9.05
 3 10 -1 18.84 11.62
 3 10 1 16.88 8.78
 -3 10 1 2.96 19.23
 3 10 1 30.47 15
 3 -10 1 -24.52 21.15
 -3 10 1 23 12.36
 3 10 -1 19.9 11.64
 3 -10 -1 35.56 23.8
 -3 10 1 15.87 3.45
 -3 10 1 12.12 8.73
 3 10 -1 18.88 9.76
 -3 -10 1 22.24 11.96
 -3 10 -1 26.35 13.33
 3 10 -1 28.3 18.12
 3 10 1 18.27 18.43
 3 10 1 28.47 13.19
 4 10 -1 593.89 75.52
 4 10 1 647.68 74.33
 4 10 -1 562.5 70.46
 -4 10 -1 709.45 124.16
 4 10 1 646.38 64.23
 -4 -10 1 371.31 85.85
 4 10 -1 581.08 61.63
 4 10 1 587.88 60.11
 -4 10 -1 683.96 68.27
 4 10 -1 638.59 66.49
 4 10 -1 757.1 74.62
 -4 10 1 665.43 68.25
 -4 -10 -1 383.31 89.31
 -4 -10 -1 743.03 112.97
 4 10 -1 555.69 60.98
 4 10 1 661.28 68.1
 4 -10 -1 709.54 106.88
 4 -10 1 637.76 109.02
 -4 10 -1 613.58 71.8
 -4 10 -1 535.28 65.79
 -4 10 1 622.74 72.63
 -4 10 1 779.87 83.64
 4 -10 -1 568.09 91.37
 4 10 -1 708.57 117.02
 4 10 -1 669.61 71.13
 -4 10 1 519.65 96.74
 -4 10 -1 750.64 73.17
 -4 10 -1 501.36 70.76
 4 10 1 594.46 73.06
 4 10 1 535.18 96.22
 5 10 1 37.17 20.83
 5 10 -1 45.18 19.27
 -5 10 -1 30.41 15.8
 5 10 -1 39.98 16.5
 5 10 -1 43.81 16.92
 -5 10 -1 32.72 17.3
 -5 10 1 36.5 18.51
 -5 10 -1 58.95 21.85
 5 10 1 46.49 22.84
 -5 10 -1 13.91 12.01
 5 10 -1 32.89 16.39
 5 10 1 28.18 13.28
 -5 -10 -1 30.21 19.73
 5 10 1 54.26 18.93
 -5 10 1 23.71 23.24
 -5 10 -1 31.12 17.98
 5 -10 -1 25.96 7.93
 5 10 -1 39.39 19.03
 5 10 -1 37.27 13.13
 5 10 -1 37.18 16.71
 -5 -10 1 41.79 28.18
 -5 10 1 47.59 22.15
 -5 -10 -1 20.63 13.94
 -5 10 1 54.74 20.83
 5 10 -1 40.9 26.47
 -5 10 -1 97.7 43.69
 5 10 1 42.72 16.54
 5 10 1 42.47 16.02
 -5 10 1 34.22 17.44
 5 -10 -1 52.85 31.22
 -6 10 -1 629.13 72.26
 -6 10 1 690.01 76.14
 6 10 -1 811.68 94.87
 6 10 -1 673.3 78.82
 -6 10 -1 748.67 73.4
 6 10 1 671.66 73.12
 -6 10 -1 853.8 79.68
 6 10 1 659.74 75.26
 6 10 1 670.02 71.86
 6 -10 -1 583.63 96.61
 -6 10 1 785.61 74.39
 -6 10 1 904.56 90.01
 6 -10 -1 720.26 106.97
 -6 -10 -1 808.73 118.26
 6 10 1 668.32 63.65
 6 10 1 713.6 82.73
 -6 -10 -1 397.48 91.15
 6 10 -1 637.18 63.99
 -6 10 1 797.63 90.73
 6 10 -1 784.66 74.08
 -6 10 1 593.96 105.03
 6 10 -1 729.4 72.9
 6 10 -1 749.78 118.55
 -6 10 -1 591.45 68.32
 -6 10 -1 651.03 80.76
 -6 -10 1 513.81 97.12
 7 10 1 11.89 10.62
 7 10 -1 18.26 11.94
 7 -10 -1 59.94 36.46
 -7 10 -1 0.9 4.58
 -7 10 -1 10.01 5.69
 -7 10 1 14.96 9.59
 -7 10 -1 12.66 10.77
 7 10 -1 11.36 6.31
 7 10 1 26.97 15.97
 -7 10 1 7.68 6.83
 7 10 -1 -5.05 9.54
 7 10 1 9.03 9.42
 7 10 -1 -7.73 11.54
 7 10 -1 11.45 10.47
 -7 10 1 10.24 2.97
 7 10 1 14.79 9.82
 -7 10 -1 -0.74 8.36
 -7 10 1 12.77 13.5
 7 10 1 16.37 11.84
 -7 10 -1 19.79 11.91
 7 10 1 12.73 11.62
 8 10 -1 237.54 42.11
 8 10 1 196.89 37.55
 -8 10 -1 187.59 42.27
 8 10 1 150.86 37.68
 8 10 -1 160.76 33.07
 -8 10 -1 240.36 41.47
 -8 10 -1 234.67 42.38
 8 10 -1 212.72 46.28
 -8 10 1 221.46 40.15
 8 10 -1 236.27 40.08
 -8 10 1 160.37 34.14
 8 10 1 230.86 37.55
 8 10 1 174.87 37.87
 -8 10 1 214.62 47.16
 8 10 1 191.9 39.52
 -8 10 -1 150.82 32.68
 8 10 -1 221.39 40.82
 -8 10 1 267.15 49.96
 9 10 -1 22.04 14.57
 9 10 1 16.03 9.92
 -9 10 1 19.19 11.8
 9 10 -1 16.43 13.91
 9 10 1 18.6 9.56
 -9 10 -1 33.77 16.42
 9 10 -1 29.43 14.76
 9 10 -1 7.08 5.65
 9 10 1 7.49 7.24
 9 10 1 16.28 8.04
 -9 10 -1 23.76 13.59
 -9 10 1 13.88 8.11
 -9 10 1 37.02 21.31
 9 10 -1 18.78 10.12
 9 10 1 8.75 7.44
 -9 10 -1 6.24 9.7
 10 10 -1 72.52 27.27
 10 10 -1 67.32 21.08
 10 10 1 62.06 22.02
 -10 10 1 86.52 25.89
 10 10 -1 58.09 21.54
 10 10 -1 110.98 28.4
 -10 10 1 66.85 27.74
 -10 10 1 74.47 24.6
 -10 10 -1 78.1 24.51
 10 10 -1 69.91 22.77
 -10 10 -1 55.68 23.67
 10 10 1 61.72 21.41
 10 10 1 48.41 22.18
 -10 10 -1 101.81 27.36
 10 10 1 69.29 22.06
 11 10 1 18.41 12.15
 11 10 -1 -0.72 6.15
 11 10 1 14.46 10.06
 -11 10 -1 22.04 13.67
 -11 10 1 20.48 15.12
 11 10 -1 25.32 14.8
 -11 10 1 11.9 6.87
 11 10 -1 12.51 11.29
 11 10 1 26.51 15.42
 -11 10 1 21.01 17.21
 -11 10 -1 8.19 9.26
 11 10 -1 9.59 6.27
 11 10 -1 8.04 8.78
 12 10 -1 -6.82 8.26
 -12 10 1 6.43 4.56
 -12 10 1 7.05 10.24
 12 10 -1 3.33 7.74
 12 10 1 7.72 6.71
 12 10 -1 8.79 8.36
 12 10 1 7.18 6.98
 12 10 -1 -4.62 4.08
 12 10 1 -20.88 12.15
 -12 10 -1 3.6 6.7
 -12 10 -1 -18.84 14.23
 -12 10 1 7.21 11.27
 -13 10 -1 3.56 5.55
 -13 -10 -1 -6.37 7.58
 13 10 -1 3.55 2.7
 -13 10 1 -1.43 8.97
 13 10 1 2.54 6.17
 13 10 -1 1.01 2.85
 13 10 -1 -5.68 8.09
 -13 10 -1 3.69 3.45
 -13 10 1 0.18 5.93
 -13 10 1 -6.12 12.18
 13 10 -1 4.22 2.71
 13 10 1 8.31 9.6
 13 10 1 6.19 6.46
 -14 -10 -1 19.93 12.24
 -14 10 1 42.36 20.55
 -14 10 1 34.25 14.8
 14 10 -1 59.39 20.01
 -14 10 -1 43.31 17.62
 -14 10 1 32.49 16.84
 14 10 -1 69.99 23.31
 14 10 -1 57.2 21.66
 -14 10 -1 21.36 10.44
 14 10 -1 41.26 16.82
 14 10 1 40.31 18.76
 14 10 1 22.14 10.95
 14 10 1 41.65 16.84
 15 10 -1 -22.22 12.21
 -15 -10 -1 -12.32 9.39
 15 10 -1 9.92 9.15
 15 10 -1 1.94 4.24
 15 10 1 -2.01 11.53
 15 10 -1 -2.81 4.41
 -15 10 1 15.6 12.5
 15 10 1 2.61 3.13
 -15 10 -1 -3.53 6.96
 -15 10 1 -2.52 8.99
 -15 10 -1 0.55 10.17
 -15 -10 1 0.37 2.33
 -15 10 1 0.46 3.45
 -15 -10 -1 -2.24 8.23
 15 10 -1 0.49 3.27
 15 10 1 -1.46 10.06
 -16 -10 1 121.02 26.77
 16 10 -1 189.47 41.07
 -16 10 -1 185.19 38.31
 -16 10 1 181.17 39.15
 16 10 -1 229.42 39.38
 -16 -10 -1 133.37 30.81
 16 10 -1 290.07 45.32
 16 10 -1 264.22 46.07
 16 10 1 176.27 38.41
 -16 10 -1 123.05 36.68
 16 10 -1 215.52 41.25
 16 10 1 174.79 35.68
 -16 -10 1 96.09 25.3
 -16 10 1 187.26 36.5
 -16 10 1 191.65 46.31
 -16 -10 -1 117.67 26.44
 16 10 1 170.8 37.03
 17 10 -1 9.64 8.64
 17 10 -1 19.59 11.87
 -17 10 -1 17.05 12.85
 17 10 -1 22.58 12.44
 17 10 -1 22.84 12.01
 17 10 1 14.58 12.55
 -17 10 1 22.84 11.47
 -17 -10 1 10 9.36
 -17 10 -1 27.3 15.81
 -17 -10 -1 1.53 5.02
 -17 10 1 29.23 15.92
 -17 10 1 14.81 3.19
 -17 -10 -1 11.31 6.39
 17 10 -1 21.6 11.12
 -17 -10 1 -0.85 4.12
 17 10 1 16.41 11.67
 -17 -10 1 11.95 9.82
 17 10 1 8.5 5.34
 -18 -10 1 88.72 26.74
 -18 10 1 205.34 37.84
 18 10 -1 262.44 42.19
 -18 10 1 176.69 39.05
 18 10 -1 252.81 41.42
 -18 10 -1 186.99 36.57
 -18 10 1 177.89 42.96
 -18 -10 1 140.86 33.29
 18 10 1 152.82 34.28
 18 10 -1 229.83 48.58
 -18 -10 -1 106.31 27.24
 -18 10 -1 143.01 39.04
 18 10 1 170.29 35.48
 18 10 -1 245.31 41.22
 -18 -10 1 97.95 22.48
 18 10 1 169.17 31.37
 -18 -10 -1 122.5 29.41
 18 10 -1 259.33 42.38
 19 10 -1 2.81 5.7
 -19 -10 1 -7.58 10.19
 19 10 1 0.58 9.53
 -19 10 1 2.26 6.24
 -19 -10 1 7.3 5.43
 -19 10 1 0.22 5.87
 -19 -10 -1 -0.69 6.88
 19 10 1 -2.54 8.78
 -19 10 -1 -8.91 8.75
 19 10 -1 -10.47 12.75
 19 10 -1 -0.9 2.69
 19 10 -1 -1.01 6.78
 -19 10 -1 1.32 6.7
 19 10 -1 -11.95 11.98
 -19 -10 -1 -3.52 8.28
 -19 -10 1 -5.94 7.34
 -19 10 1 -1.22 6.53
 19 10 1 28.86 18.74
 19 10 1 1.35 5.15
 -20 -10 1 33.52 15.17
 -20 -10 -1 46.08 18.15
 20 10 -1 95.18 26.34
 -20 -10 -1 18.03 10.04
 -20 10 1 53.81 17.37
 -20 10 -1 83.53 23.96
 20 10 -1 84.95 23.98
 -20 10 1 64.95 22.35
 20 10 1 43.56 14.42
 -20 10 1 72.22 27.3
 -20 -10 1 36.07 15.67
 20 10 1 69.86 20.13
 20 10 1 42.47 18.77
 -20 10 -1 57.16 22.41
 20 10 1 32.89 15.86
 20 10 -1 105.48 26.73
 20 10 -1 94.06 24.56
 20 10 1 63.41 20.39
 20 10 -1 75.71 26.32
 -20 -10 -1 34.66 12.17
 -20 -10 1 28.43 14.6
 -20 -10 -1 34.82 13.46
 20 10 1 59.07 22.17
 -21 -10 1 11.24 6.64
 -21 -10 -1 10.59 10.45
 -21 10 -1 -35.02 14.97
 21 10 1 -6.45 9.24
 -21 10 1 -0.22 6.16
 21 10 1 -0.87 5.96
 21 10 -1 3.18 6.83
 21 10 1 0.62 5.1
 21 10 -1 -5.63 8.35
 -21 -10 1 11.39 9.26
 21 10 1 3.23 6.8
 -21 -10 -1 -1.4 8.78
 -21 10 -1 5.98 10.39
 -21 -10 -1 -3.11 2.83
 21 10 1 -3.09 8.01
 -21 -10 1 -6.55 6.38
 -21 10 1 -6.44 8.54
 21 10 1 -1.77 7.85
 -21 -10 -1 2.65 4.08
 21 10 -1 1.67 4.67
 22 10 1 67.68 17.7
 -22 -10 1 30.81 14.2
 -22 -10 -1 59.85 20.72
 22 10 1 51.15 20.54
 22 10 -1 76.89 22.29
 -22 -10 1 48.72 19.06
 22 10 -1 96.19 24.04
 -22 10 1 37.09 11.83
 22 10 1 63.43 19.93
 22 10 1 30.42 12.55
 -22 -10 -1 33.42 14.32
 -22 10 -1 29.36 11.88
 -22 10 1 66.29 19.38
 -22 10 -1 72.27 21.68
 22 10 1 36.66 7
 -22 -10 1 43.59 15.77
 -22 -10 -1 15.78 4.1
 22 10 1 47.25 15.08
 22 10 -1 69.98 20.97
 -22 -10 -1 16.6 3.36
 -23 -10 1 3.04 9.26
 -23 10 -1 19.72 13.32
 23 10 1 13.79 7.45
 23 10 -1 3.47 2.14
 -23 10 1 -3.32 6.79
 -23 10 -1 -1.33 6.94
 -23 -10 1 -7.73 6.83
 23 10 1 19.7 10.58
 23 10 -1 10.64 10.51
 -23 10 1 4.97 7.55
 -23 -10 -1 5.57 8.02
 23 10 1 0.67 7.19
 -23 -10 -1 -2.77 4.35
 23 10 -1 8.88 10.5
 23 10 1 5.07 7.22
 -23 -10 1 -2.5 4.98
 23 10 1 5.32 5.69
 -23 -10 -1 11.55 8.9
 -23 -10 1 4.86 4.51
 -23 -10 -1 -8.85 8.81
 23 10 1 -0.1 6.8
 -24 -10 -1 2.09 6.1
 -24 -10 -1 8.85 8.2
 24 10 -1 4.54 3.8
 -24 10 1 3.46 4.07
 -24 10 -1 3.61 5.28
 -24 -10 1 6.33 6.25
 -24 -10 1 4.04 7.98
 24 10 1 -9.27 16.29
 -24 -10 1 -6.67 3.85
 24 10 1 14.84 11.78
 24 10 1 2.65 1.66
 -24 10 -1 -0.37 4.43
 24 10 1 -12.2 7.47
 24 10 -1 0.07 4.45
 24 10 1 1.39 5.93
 -24 -10 -1 14.69 10.02
 -24 -10 -1 12.97 10.32
 24 10 1 -15.31 11
 -25 -10 1 -9.47 6.86
 25 10 1 9.28 6.26
 25 10 1 7.44 8.98
 25 10 -1 -2.8 8.14
 -25 -10 1 4.94 5.88
 -25 10 -1 5.75 10.23
 25 10 -1 7.16 8.93
 -25 10 -1 3.02 3.07
 -25 -10 -1 -5.93 5.36
 25 10 1 -3.75 4.86
 -25 10 1 7.55 4.98
 -25 -10 1 -0.31 4.42
 -25 -10 -1 -4.49 5.68
 -25 -10 -1 -1.2 2.83
 0 11 -1 3.2 2.66
 0 11 -1 6.33 10.93
 0 11 1 -4 5.4
 0 11 -1 -4.49 11.4
 0 11 1 2.77 5.04
 0 11 -1 10.67 11.8
 0 11 1 2.21 4.99
 0 11 1 -1.4 9.45
 1 11 1 -3.01 5.45
 -1 11 -1 -0.6 7.76
 1 11 -1 2.82 6.62
 1 11 -1 -3.25 10.68
 1 11 1 -4.38 11.18
 -1 11 -1 -0.94 3.02
 1 11 -1 1.54 6.32
 1 11 1 -10.47 13.79
 -1 11 1 -13.2 12.17
 -1 11 -1 9.24 11.6
 1 11 1 1.39 3.82
 1 11 -1 -21.97 12.38
 -1 11 -1 13.38 10.38
 -1 11 1 -1.19 5.55
 -1 11 1 -4.28 5.73
 -1 11 1 2.69 5.6
 1 11 1 8.4 9.44
 -2 11 1 19.32 12.68
 2 11 1 15.79 12.02
 2 11 1 26.25 17.23
 -2 11 -1 10.94 7.32
 -2 11 1 24.98 15
 -2 11 1 10.63 4.21
 -2 11 -1 18.85 10.39
 2 11 1 17.06 12.64
 2 11 1 25.39 11.82
 2 11 -1 8.99 4.32
 2 11 -1 34.19 18.07
 -2 11 -1 22.4 10.7
 2 11 -1 17.76 11.59
 2 11 1 20.04 10.94
 -2 11 -1 15.02 11.82
 2 11 -1 24.22 17.78
 -3 11 1 37.13 13.46
 -3 11 -1 68.36 22.82
 3 11 -1 52.9 18.83
 3 11 1 53.13 21.34
 -3 11 -1 66.83 21.52
 -3 11 -1 63.18 23.69
 3 11 1 45.01 19.84
 -3 11 1 60.02 24.1
 -3 11 1 69.7 22.28
 3 11 1 54.3 19.24
 3 11 -1 73.96 25.76
 3 11 1 81.25 24.95
 -3 11 -1 42.72 15.32
 3 11 -1 62.47 21.42
 3 11 -1 54.32 21.8
 3 11 1 65.42 23.48
 4 11 1 2.42 3.4
 -4 11 -1 -2.88 6.76
 -4 11 -1 3.27 6.54
 4 11 -1 8.9 9.08
 4 11 -1 1.77 6.02
 4 11 1 7.26 6.27
 -4 11 -1 6.85 3.64
 -4 11 1 10.64 10.08
 -4 11 1 9.17 9.73
 4 11 -1 7.72 5.78
 -4 11 -1 14.3 10.41
 4 11 1 3.11 7.18
 4 11 1 11.87 11.16
 4 11 -1 7.74 7.62
 4 11 -1 -0.42 6
 4 11 1 8.47 2.24
 -4 11 1 13.73 10.2
 5 11 -1 -3.96 6.92
 5 11 1 1.45 12.95
 -5 11 1 14.19 9.52
 -5 11 1 14.31 10.75
 5 11 1 18.12 16.09
 -5 11 -1 14.87 9.35
 -5 11 1 2.51 6.9
 -5 11 -1 8.91 9.68
 5 11 -1 5.38 5.22
 -5 11 -1 -0.69 5.04
 5 11 -1 18.59 14.97
 5 11 1 11.71 10.16
 5 11 -1 16.96 11.29
 5 11 1 10.21 7.81
 -5 11 -1 12.08 8.89
 5 11 1 -6.67 11.75
 -5 11 1 -1.54 9
 -5 11 -1 6.72 9.36
 6 11 -1 79.19 23.13
 -6 11 -1 100.43 28.82
 -6 11 -1 66.88 23.3
 6 11 1 98.13 28.72
 6 11 1 87.42 24.91
 -6 11 -1 117.34 30.22
 6 11 1 70.24 25.38
 -6 11 1 100.77 29.72
 6 11 1 83.34 21.29
 -6 11 -1 99.09 27.36
 6 11 -1 65.04 25.34
 6 11 -1 118.62 29.58
 -6 11 1 94.27 29.82
 -6 11 1 86.23 29.99
 -6 11 -1 72.9 26.27
 -6 11 1 112.97 29.4
 6 11 -1 57.08 22.43
 6 11 1 63 21.92
 7 11 -1 12.05 12.86
 7 11 1 9.41 7.82
 -7 11 -1 23.42 13.75
 -7 11 -1 10.96 10.42
 7 11 1 1.48 3.03
 -7 11 1 5.5 1.99
 7 11 -1 14.55 10.74
 -7 11 1 1.91 4.15
 7 11 -1 14.16 11.48
 7 11 -1 6.36 2.55
 -7 11 -1 25.36 15.85
 7 11 1 15.38 12.87
 7 11 1 4.94 9.67
 -7 11 -1 10.87 11.46
 7 11 1 -6.1 12.56
 7 11 -1 -0.84 8.93
 -7 11 1 11.42 13.49
 -7 11 -1 -14.89 12.45
 -7 11 1 11.74 9.9
 8 11 1 7.72 9.03
 -8 11 1 26.95 15.84
 -8 11 -1 29.67 13.17
 8 11 -1 31.71 17.53
 8 11 1 27.52 12.26
 8 11 1 9.7 6.94
 8 11 -1 14.41 7.28
 -8 11 -1 24.94 14.56
 8 11 1 23.14 13.88
 -8 11 1 31.31 16.14
 8 11 -1 25.08 13.41
 8 11 -1 11.98 9.11
 8 11 1 33.31 15.31
 8 11 -1 24.59 15.27
 -8 11 -1 19.85 13.31
 8 11 1 1.29 8.89
 -8 11 -1 20.48 14.21
 -8 11 1 20.76 14.96
 -8 11 -1 20.46 15.07
 -8 11 1 30.07 17.29
 9 11 -1 10.4 7.38
 -9 11 1 1.29 9.01
 -9 11 -1 6.96 6.62
 -9 11 1 6.79 4.52
 9 11 1 7.91 8.83
 9 11 -1 6.52 7.92
 9 11 1 7.48 4.45
 9 11 -1 8.87 8.36
 -9 11 -1 16.81 14.29
 9 11 -1 1.25 6.67
 -9 11 -1 5.96 9.27
 9 11 1 10.58 6.91
 -9 11 1 20.42 13.98
 -9 11 -1 1.07 6.43
 -9 11 1 9.5 6.85
 9 11 1 10.12 10.37
 9 11 1 12.56 11.57
 9 11 1 4.36 4.62
 10 11 1 -3.19 14.66
 -10 11 1 -1.87 6.46
 -10 11 -1 -2.3 4.26
 -10 11 1 -1.01 7.59
 10 11 -1 6.2 9.27
 10 11 -1 4.39 7.53
 10 11 1 2.12 5.76
 10 11 1 -4.05 13.13
 10 11 -1 -5.19 10.24
 -10 11 1 13.09 11.89
 10 11 1 8.28 8.31
 -10 11 -1 7.83 11.22
 10 11 -1 6.65 3.08
 10 11 1 8.45 10.6
 10 11 -1 2.3 9.23
 11 11 -1 -17.89 16.76
 11 11 -1 -4.71 10.04
 -11 11 1 -17.95 11.55
 11 11 1 10.68 11.86
 11 11 -1 1.97 5.6
 11 11 -1 1.91 4.71
 11 11 -1 -2 6.06
 11 11 1 0.18 2.76
 -11 11 -1 -2.93 3.05
 11 11 1 16.08 12.93
 -11 11 1 -2.65 3.99
 11 11 1 3.83 6.87
 -11 11 -1 -1.76 9.85
 -11 11 1 -4.97 14.2
 11 11 1 7.79 6.35
 12 11 -1 8.91 9.17
 12 11 -1 1.62 14.31
 -12 11 -1 15.35 11.56
 -12 11 1 7.87 4.67
 12 11 -1 7.05 5.54
 12 11 -1 13.06 10.16
 12 11 1 8.43 11.28
 -12 11 1 7.45 6.21
 12 11 1 13.33 8.49
 12 11 -1 9.44 9.19
 12 11 1 7.21 2.63
 12 11 1 3.91 3.66
 -12 -11 -1 2.21 6.74
 -12 11 -1 6.44 8.81
 -12 11 1 21.73 16.68
 -13 -11 -1 6.77 6.27
 13 11 1 6.6 6.19
 -13 11 1 2.7 7.56
 13 11 -1 11.4 3.91
 -13 11 -1 -3.63 7.46
 13 11 -1 5.96 5.53
 13 11 -1 -1.92 13.03
 -13 11 -1 -3.48 8.22
 13 11 1 0.81 6.16
 -13 11 1 7.86 8.45
 -13 11 1 -7.34 11.53
 13 11 -1 3.21 3.94
 13 11 1 -1.31 5.82
 13 11 1 -1.99 9.74
 -14 -11 -1 -9.25 9.69
 -14 11 -1 3.84 10.51
 14 11 1 7.87 3.78
 14 11 -1 3.09 5.59
 -14 11 -1 10.79 10.77
 14 11 1 -6.52 8.37
 14 11 -1 1.06 4.72
 -14 11 1 2.36 7.04
 -14 -11 -1 -1.01 4.83
 14 11 1 0.81 7.08
 14 11 -1 6.63 9.23
 -14 11 1 17.33 14.65
 -14 11 1 3.76 6.64
 14 11 -1 4.95 4.94
 14 11 1 4.14 8.73
 -15 -11 -1 9.53 13.51
 -15 11 1 6.22 5.7
 -15 11 -1 5.79 6.83
 15 11 -1 9.25 4.09
 15 11 -1 3.97 2.41
 15 11 -1 19.24 11.28
 15 11 -1 16.21 10.08
 -15 11 -1 21.69 17.96
 15 11 1 8.59 3.68
 15 11 1 1.35 3.35
 -15 11 1 22.2 14.01
 -15 11 1 14.74 9.33
 -15 -11 -1 5.25 7.24
 -15 -11 1 -5.6 5.59
 15 11 1 -4.46 14.24
 -16 11 -1 -1.68 6.04
 -16 -11 -1 5.11 8.24
 -16 -11 1 8.91 5.18
 -16 -11 -1 4.05 5.4
 -16 11 1 3.47 3.1
 16 11 1 3.65 4.07
 16 11 1 2.56 3.1
 -16 11 -1 -3.31 12.04
 16 11 -1 0.88 6.94
 16 11 -1 9.68 9.35
 -16 11 1 -4.35 8.12
 16 11 -1 11.47 8.86
 -16 11 1 6.48 6.34
 16 11 -1 13.19 11.71
 16 11 1 -10.1 14.84
 -17 -11 1 3.08 8.89
 17 11 -1 13.57 11.79
 -17 -11 -1 -1.03 2.65
 -17 11 1 3.41 5.33
 -17 11 1 -3.22 9.65
 -17 11 1 0.43 7.36
 17 11 1 -6.44 10.2
 -17 11 -1 13.06 12.37
 17 11 -1 0.82 6.37
 17 11 1 -3.05 4.18
 -17 11 -1 6.6 12.76
 17 11 1 -1.9 6.36
 17 11 -1 -10.63 10.01
 17 11 -1 0.16 6.09
 -17 -11 -1 -0.49 4.78
 -17 -11 1 -3.49 8.99
 -18 -11 1 14.95 14.76
 -18 -11 -1 10.57 7.68
 18 11 -1 26.5 14.53
 18 11 -1 40.34 15.71
 -18 11 -1 16.44 13.36
 18 11 -1 29.41 12.61
 18 11 1 24.14 11.52
 -18 11 1 9.96 6.25
 18 11 1 19.26 12.78
 -18 11 1 -1.66 7.75
 18 11 -1 36.67 16.88
 -18 11 -1 20.25 11.56
 -18 11 1 12.99 9.8
 -18 -11 -1 10.47 9.74
 18 11 1 13.24 8.15
 -18 -11 1 0.43 5.43
 -19 11 1 -7.33 7.63
 -19 -11 -1 -16.73 14.2
 19 11 -1 -7.15 7.86
 19 11 -1 9.38 5.3
 -19 -11 -1 -15.85 12.65
 -19 11 -1 -2.85 10.16
 19 11 -1 7.32 7.54
 -19 11 -1 14.88 16.91
 19 11 1 6.04 7.81
 19 11 -1 9.77 2.94
 -19 11 1 6.35 6.56
 -19 -11 1 2.87 10.82
 -19 11 1 -9.52 11.15
 19 11 1 1.98 4.11
 -19 -11 -1 -20.52 12.46
 -19 -11 1 2.94 2.78
 19 11 1 7.21 10.03
 20 11 -1 -11.57 10.68
 -20 -11 -1 -8.4 7.26
 20 11 1 -6.89 7.54
 -20 11 -1 2.22 6.83
 -20 11 1 5.32 5.77
 -20 -11 -1 1.54 3.53
 20 11 -1 -1.97 6.69
 -20 11 1 4.33 6.56
 -20 11 -1 -0.88 9.02
 20 11 1 12.06 12.27
 -20 -11 -1 17.25 15.18
 -20 -11 -1 -6.61 8.21
 -20 -11 1 -5.99 6.19
 20 11 -1 17.93 10.05
 20 11 -1 -11.3 11.31
 -20 -11 1 -2.7 2.87
 20 11 1 -7.18 6.88
 -21 -11 -1 -3.97 10.25
 -21 -11 -1 -3.71 7.39
 -21 -11 -1 17.59 12.58
 -21 11 1 3.16 5.19
 -21 11 -1 3.76 2.02
 21 11 1 7.31 6.13
 21 11 -1 14.28 10.48
 -21 -11 1 1.25 6.64
 -21 -11 -1 -8.15 8.86
 21 11 1 -6.34 6.02
 -21 11 1 -2.94 5.64
 -21 11 -1 4.09 9.63
 -21 -11 1 -10.2 7.74
 21 11 -1 -3.66 8.66
 21 11 1 -6.95 5.93
 -22 -11 1 -15.22 8.41
 -22 -11 -1 4.91 6.08
 -22 11 1 -6.82 5.29
 22 11 1 2.12 4.33
 -22 -11 -1 7.11 4.72
 -22 11 1 5.3 7.6
 -22 -11 -1 -2.18 4.12
 22 11 1 -2.61 3.54
 -22 11 -1 -5.2 8.7
 22 11 -1 -2.34 6.56
 -22 11 -1 -2.67 5.79
 -22 -11 -1 1.45 6.97
 22 11 -1 -4.54 3.78
 -22 -11 1 3.36 3.12
 -23 -11 -1 7.46 5.76
 -23 11 -1 -8.56 9.55
 -23 -11 -1 2.61 3.15
 -23 11 1 4.84 3.22
 -23 -11 1 2.07 2.83
 -23 -11 1 -3.54 5.79
 23 11 1 8.92 7.16
 -23 11 -1 -3.23 5.15
 23 11 -1 -5.35 8.23
 -23 -11 -1 -0.71 3.95
 23 11 -1 -10.49 8.49
 23 11 1 0.1 4.7
 -23 -11 -1 -4.3 5.09
 -23 -11 1 -18.07 11.78
 -24 11 -1 -0.67 3.29
 -24 -11 -1 -6.17 6.71
 24 11 -1 -12.08 11.02
 -24 -11 1 -3.42 6.88
 -24 -11 -1 -4.62 5.31
 24 11 -1 -1.27 5.62
 -24 -11 1 5.36 5.92
 0 12 1 0.43 3.71
 0 12 1 -0.73 4.45
 0 12 1 -4 7.13
 0 12 -1 3.31 5.92
 0 12 1 6.93 9.18
 0 12 -1 -1.81 5.38
 0 12 -1 4.15 4.86
 0 12 -1 -4.88 8.17
 -1 12 -1 -4.24 5.33
 1 12 1 1.75 5.46
 1 12 -1 -1.36 4.45
 1 12 -1 1.9 7.83
 1 12 1 -3.9 1.65
 1 12 1 -9.04 9.29
 -1 12 1 3.86 3.32
 1 12 -1 0.23 9.49
 -1 12 -1 -3.61 10.04
 -1 12 -1 6.09 5.83
 -1 12 1 3.14 7.53
 -1 12 -1 2.35 5.31
 1 12 1 8.92 8.07
 -1 12 1 -2.45 6.79
 1 12 -1 2.08 4.26
 2 12 -1 89.62 29.31
 2 12 -1 75.09 27.64
 -2 12 -1 104.58 30.61
 2 12 -1 105.75 29.32
 2 12 1 93.35 26.76
 2 12 1 77.06 28.7
 -2 12 -1 104.72 28.5
 2 12 1 79.18 27.86
 -2 12 -1 41.75 12.86
 -2 12 1 87.91 29.58
 -2 12 1 108.93 28.71
 2 12 1 82.55 24.25
 -2 12 1 77.22 25.85
 -2 12 -1 77.56 24.93
 2 12 -1 93.43 24.97
 3 12 -1 -37.9 19.04
 -3 12 -1 14.94 12.85
 -3 12 -1 22.09 14.37
 3 12 -1 2.74 5.22
 -3 12 -1 8.57 10.9
 3 12 -1 10.72 11.35
 -3 12 1 2.33 2.5
 3 12 1 3.34 3.79
 3 12 -1 14.54 14.99
 3 12 1 9.12 8.26
 -3 12 1 9.55 8.03
 -3 12 1 9.78 12.5
 -3 12 -1 13.82 11.85
 3 12 1 4.4 5.77
 4 12 -1 332.75 57.46
 -4 12 -1 327.73 53.95
 -4 12 1 287.82 50.95
 -4 12 1 328.7 51.12
 -4 12 1 373.64 60.48
 4 12 1 336.04 58.4
 -4 12 -1 422.81 59.26
 -4 12 -1 394.21 54.9
 4 12 -1 320.81 58.68
 4 12 -1 298.38 46.54
 -4 12 -1 253.83 46.91
 4 12 1 349.5 50.98
 4 12 1 264.02 51.7
 5 12 -1 0.4 6.44
 5 12 1 12.59 12.2
 -5 12 -1 3.74 5.51
 5 12 -1 5 5.16
 5 12 -1 -5.62 5.1
 -5 12 1 -3.98 15.23
 5 12 1 6.3 6.73
 -5 12 -1 6.54 8.01
 -5 12 1 -3.16 7.7
 -5 12 -1 8.63 4.34
 -5 12 1 4.04 3.04
 5 12 1 4.73 8.12
 -5 12 -1 9.57 10.13
 6 12 1 273.37 51.65
 -6 12 1 291.75 51.17
 -6 12 1 358.63 58.51
 -6 12 -1 404.34 55.35
 6 12 -1 271.48 44.89
 6 12 1 331.55 48.88
 -6 12 -1 231.26 43.21
 -6 12 1 346.79 52.39
 6 12 1 204.72 46.08
 -6 12 -1 356.14 53.81
 6 12 -1 222.57 46.87
 -6 12 -1 288.6 48.75
 -6 12 1 273.82 50.39
 -6 12 -1 330.41 58.77
 6 12 1 422.24 57.7
 7 12 -1 1.48 7.24
 7 12 -1 -0.21 8.51
 -7 12 -1 0.4 6.49
 7 12 1 -10.11 15.15
 -7 12 -1 5.99 7.15
 -7 12 1 14.9 15.84
 -7 12 -1 20.19 17.09
 -7 12 1 23.56 10.3
 -7 12 -1 1.15 5.04
 -7 12 1 12.34 9.11
 7 12 1 7.57 9.87
 -7 12 1 8.72 10.81
 7 12 1 6.26 4.87
 7 12 -1 6.52 7.53
 -7 12 -1 1.58 2.72
 7 12 1 -0.81 4.22
 -8 12 -1 77.68 25.42
 -8 12 1 109.66 28.36
 -8 12 -1 107.72 29.43
 -8 12 -1 147.79 32.51
 8 12 -1 91.08 26.11
 -8 12 1 106.28 34.24
 -8 12 -1 57.16 19.74
 8 12 -1 114.9 29.05
 -8 12 1 111.34 29.56
 8 12 1 49.84 21.69
 -8 12 1 83.69 25.55
 8 12 1 121.77 30.11
 8 12 1 93.9 27.13
 -8 12 -1 95.93 31.39
 8 12 1 27.3 4.49
 8 12 -1 58.2 23.15
 -9 12 -1 25.29 14.46
 -9 12 -1 12.01 10.02
 -9 12 1 12.04 4.23
 -9 12 -1 7.36 3.89
 9 12 -1 18.32 11.86
 9 12 -1 12.32 4.45
 -9 12 1 11.98 8.25
 9 12 1 17.55 12.16
 -9 12 -1 7.9 4.4
 9 12 -1 15.67 10.49
 9 12 1 17.88 4.08
 9 12 1 27.57 16.77
 9 12 1 12.79 6.7
 -9 12 1 7.75 10.87
 -9 12 1 9.54 8.12
 10 12 1 0.93 5.57
 -10 12 1 7.42 4.21
 -10 12 1 2.42 6.16
 10 12 1 1.62 4.29
 -10 12 -1 3.94 5.85
 10 12 -1 4.03 4.92
 10 12 1 1.06 6.81
 -10 12 1 4.14 15.46
 -10 12 -1 5.96 4.97
 10 12 -1 18.46 11.6
 10 12 -1 4.88 3.52
 -11 12 1 -3.05 8.6
 11 12 -1 -9.55 13.21
 -11 12 -1 4.22 5.4
 -11 12 1 -1.39 7.37
 11 12 1 0.9 6
 11 12 -1 -16.66 11.32
 11 12 -1 8.84 7.03
 -11 12 1 2.04 3.65
 11 12 1 4.64 2.16
 -11 -12 -1 -11.44 9.87
 -11 12 -1 6.73 9.88
 11 12 1 -32.53 17.55
 11 12 1 -5.35 10.28
 -12 -12 -1 -9.97 7.74
 12 12 -1 -0.61 13.09
 12 12 -1 3.42 4.81
 12 12 -1 -2.55 3.24
 -12 12 1 -1.52 4.59
 -12 12 -1 2.21 4.08
 12 12 1 10.62 12.13
 12 12 -1 2.79 4.95
 12 12 1 20.53 13.96
 -12 12 1 -0.11 7.42
 -12 12 1 2.45 5.51
 12 12 1 -1.55 4
 -12 12 -1 -1.95 8.17
 -13 -12 -1 3.94 9.9
 13 12 -1 0.46 4.33
 13 12 1 -3.17 9.94
 13 12 1 14.21 10.51
 -13 12 1 -2.95 7.03
 -13 -12 -1 -6.16 10.52
 13 12 -1 0.97 3.8
 -13 12 -1 0.83 7.25
 13 12 -1 10.89 8.79
 13 12 -1 5.22 6.41
 -13 12 1 -2.13 8.46
 13 12 1 -4.81 6.24
 -13 12 1 10.42 12.34
 -13 12 -1 -0.21 11.44
 13 12 -1 26.88 16.15
 14 12 1 98.86 26.41
 14 12 1 86.44 24.96
 -14 -12 -1 32.36 14.11
 -14 12 -1 98.54 25.86
 14 12 -1 89.25 24.62
 -14 12 -1 74.99 27.62
 14 12 -1 115.51 29.26
 -14 -12 1 51.23 17.23
 -14 12 1 72 23.15
 -14 12 1 92.35 30.05
 -14 -12 -1 45.98 17.59
 14 12 -1 89.79 26.44
 -14 12 1 53.64 19.14
 14 12 -1 140.03 32.04
 14 12 1 103.5 27.06
 -15 -12 -1 14.83 10.78
 15 12 1 -4.66 7.64
 -15 -12 -1 -6.07 8.84
 -15 12 -1 -2.07 9.72
 -15 12 -1 -12.05 16.6
 15 12 -1 -0.57 9.07
 15 12 -1 -1.82 9.61
 -15 12 1 3.93 9.42
 15 12 1 4.52 3.9
 15 12 -1 4.59 3.76
 -15 12 1 4.38 7.99
 -15 12 1 6.14 6.68
 -15 -12 1 -7.79 9.51
 15 12 1 7.91 8.65
 -16 12 1 126.28 28.14
 -16 -12 1 50.51 16.86
 16 12 -1 135.24 28.65
 16 12 1 99.35 26.3
 -16 -12 -1 79.58 21.16
 -16 12 -1 112.73 27.15
 16 12 -1 203.02 36.63
 16 12 -1 180.74 34.23
 16 12 1 119.55 27.06
 -16 12 -1 88.99 28.32
 -16 12 1 69.04 21.4
 -16 12 1 126.9 34.22
 -16 -12 -1 56.09 17.96
 -16 -12 1 51.92 16.75
 16 12 1 115.84 28.29
 -17 -12 1 -13.38 13.07
 -17 -12 -1 2.78 4.24
 17 12 -1 -5.24 8.38
 -17 -12 1 -3.99 5.8
 17 12 1 2.07 2.53
 -17 12 1 -29.68 14.5
 -17 12 -1 1.14 12.64
 17 12 1 2.72 6.23
 17 12 1 8.79 9.8
 -17 12 1 4.41 7.73
 -17 12 -1 4.53 5.16
 17 12 -1 -15.5 11.83
 -17 -12 -1 -5.49 9.2
 17 12 -1 -0.83 6.13
 -18 -12 -1 -5.77 7.64
 18 12 -1 8.38 2.17
 -18 12 1 23.27 13.44
 -18 12 -1 11.87 9.35
 18 12 1 24.16 13.98
 -18 -12 1 -6.32 7.01
 -18 12 1 8.18 7.67
 18 12 -1 10.1 7.77
 18 12 1 4.42 4.64
 18 12 -1 16.14 10.19
 -18 -12 -1 -8.88 9.47
 -18 -12 1 -0.92 8.66
 -18 12 -1 23.09 10.16
 19 12 -1 9 8.05
 -19 -12 1 9.28 10.46
 -19 12 -1 -2.11 8.66
 -19 -12 1 -3.16 6.38
 -19 -12 -1 4.69 5.11
 -19 -12 -1 -4.1 7.77
 -19 12 1 -3.71 8.18
 19 12 -1 -18.88 13.03
 -19 12 -1 5.02 9.25
 -19 12 1 10.22 6.08
 19 12 1 16.93 9.92
 19 12 1 9.76 11.34
 19 12 -1 -3.85 8.68
 -19 -12 -1 4.33 6.05
 -19 -12 -1 -4.91 6.79
 -20 -12 -1 24.68 12.43
 20 12 1 16.66 8.76
 -20 -12 -1 2.68 3.76
 20 12 -1 44.94 15.48
 -20 12 1 6.48 5.08
 -20 12 -1 16.47 8.53
 -20 -12 1 -4.39 4.68
 20 12 1 23.26 12.31
 -20 -12 -1 15.34 8.06
 20 12 -1 11.69 9.4
 -20 12 -1 50.38 16.88
 20 12 -1 26.55 10.64
 -20 12 1 23.77 9.91
 -20 -12 1 8.71 4.14
 20 12 -1 22.57 12.49
 -21 -12 -1 6.67 6.18
 -21 -12 -1 14.39 9.06
 21 12 -1 8.84 9.01
 -21 12 -1 10.83 9.74
 21 12 1 -5.61 3.18
 -21 -12 1 -15.02 12.66
 -21 12 1 12.63 9.55
 -21 -12 -1 -0.28 6.27
 21 12 -1 -1.61 4.75
 -21 12 1 8.52 6.6
 -21 12 -1 4.67 10.43
 -21 -12 1 0.22 4.43
 21 12 1 -9.03 6.55
 -22 -12 -1 4.68 1.62
 -22 -12 1 -0.93 4.64
 -22 -12 1 2.03 3.24
 22 12 1 5.41 6.45
 -22 12 -1 3.11 2.52
 -22 -12 1 -1.25 5.61
 -22 -12 -1 -0.42 4.32
 0 13 -1 2.06 8.31
 0 13 1 -5.75 6.53
 0 13 -1 -2.88 13.29
 0 13 1 -3.29 6.21
 0 13 1 -7.72 8.36
 0 13 -1 -9.67 13.97
 0 13 -1 -3.6 7.94
 0 13 1 9.83 11.29
 -1 13 -1 15.79 12.6
 1 13 1 24.57 12.31
 1 13 -1 3.87 5.36
 -1 13 1 13.56 8.66
 1 13 1 12.84 13.48
 -1 13 -1 -3.1 7.67
 1 13 1 7.11 2.98
 1 13 1 14.59 14.8
 1 13 -1 17.66 13.32
 -1 13 -1 9.42 4.72
 1 13 -1 5.14 2.41
 -1 13 -1 10.66 9.39
 -1 13 1 2.45 6.08
 1 13 -1 12.32 4.79
 -1 13 1 1.89 2.71
 -2 13 -1 63.65 21.08
 -2 13 1 81.41 26.06
 2 13 -1 85.55 24.09
 2 13 1 98.26 25.8
 -2 13 1 80.85 27.76
 2 13 1 87.24 29.76
 -2 13 -1 123.83 33.32
 -2 13 1 100.2 26.89
 -2 13 -1 55.38 19.97
 -2 13 -1 122 31.12
 2 13 -1 48.03 19.38
 2 13 1 67.46 24.51
 2 13 -1 53.68 21.11
 -3 13 -1 19.85 12.59
 3 13 1 -4.17 11.36
 -3 13 1 7.15 5.97
 3 13 1 10.27 8.12
 -3 13 1 0.43 10.5
 -3 13 -1 14.25 12.43
 3 13 -1 -4.85 9.11
 -3 13 -1 10.25 10.54
 -3 13 1 6.26 8.33
 3 13 -1 2.16 11.7
 3 13 1 8.03 10.22
 3 13 -1 14.1 8.16
 -3 13 -1 19.87 14.7
 4 13 1 26.22 13.3
 4 13 -1 22.99 12.88
 -4 13 1 26.06 13.57
 -4 13 -1 40.96 16.89
 4 13 -1 25.98 14.93
 4 13 -1 26.41 18.37
 4 13 1 28.88 13.48
 -4 13 1 27.25 15.59
 4 13 1 22.51 9.67
 -4 13 -1 14.33 10.58
 -4 13 1 24.13 14.64
 -4 13 -1 45.81 21.29
 -4 13 -1 19.65 8.24
 -5 13 -1 39.22 14.28
 5 13 1 36.82 14.8
 5 13 -1 55.78 20.22
 -5 13 -1 69.78 23.24
 -5 13 1 48.14 18.9
 5 13 1 58.57 22.92
 5 13 1 35.62 16.6
 -5 13 1 46.97 19.6
 -5 13 -1 61.4 23.15
 5 13 -1 24.17 13.14
 -5 13 -1 51.7 20.68
 -5 13 1 68.27 23.25
 6 13 1 13.44 12.1
 6 13 1 13.77 9.06
 -6 13 1 11.93 10.57
 6 13 -1 14.11 9.79
 6 13 1 4.14 5.91
 -6 13 1 15.04 4.83
 -6 13 -1 31.49 15.47
 -6 13 -1 9.1 7.67
 -6 13 -1 8.04 3.02
 -6 13 1 4.64 3.73
 6 13 -1 7.69 4.29
 -6 13 -1 21.72 7.81
 -7 13 -1 59.89 22.34
 7 13 1 23.37 15.87
 7 13 1 49.79 20.16
 -7 13 -1 61.64 22.23
 -7 13 -1 38.88 15.45
 -7 13 1 53.62 19.63
 7 13 1 22.48 12.93
 -7 13 -1 25.57 12.15
 -7 13 1 25.79 8.59
 7 13 -1 37.35 15.87
 -7 13 1 38.36 17.08
 -7 13 -1 30.94 16.7
 7 13 -1 37.28 17.8
 7 13 1 65.97 21.03
 8 13 1 204.57 43.31
 -8 13 -1 262.65 44.38
 -8 13 -1 302.4 45.31
 8 13 -1 219.22 38.83
 8 13 1 263.36 46.75
 -8 13 -1 164.33 36.05
 -8 13 1 235.67 43.18
 -8 13 1 204.79 41.58
 -8 13 1 178.49 36
 -8 13 1 257.81 48.35
 -8 13 -1 190.02 37.46
 8 13 -1 138.33 35.24
 -8 13 -1 180.6 40.09
 8 13 1 311.86 47.76
 9 13 1 50.85 19.88
 -9 13 -1 68.67 25.42
 -9 13 1 42.03 17.05
 9 13 -1 45.19 18.71
 9 13 1 74.92 22.11
 -9 13 1 56.4 20.31
 -9 13 1 71.35 23.59
 -9 13 1 70.1 24.16
 9 13 1 57.06 20.54
 -9 13 -1 20.39 8.75
 9 13 -1 26.91 12.17
 -9 13 -1 77.92 24.33
 10 13 1 130.86 34.9
 -10 13 -1 135.6 30.53
 10 13 -1 134.62 29.31
 -10 13 1 125.8 32.81
 10 13 -1 75.78 24.94
 10 13 1 157.84 33.21
 10 13 1 175.79 36.66
 -10 13 1 119.24 31.87
 -10 13 1 131.03 30.8
 -10 13 -1 130.28 33.23
 11 13 -1 9.71 9.32
 11 13 1 5.58 7.24
 11 13 1 -4.31 7.74
 -11 13 -1 -5.53 9.06
 -11 13 1 10.9 13.97
 -11 13 1 -0.47 3.99
 11 13 -1 6.85 6.38
 -11 13 -1 -1.62 11.93
 11 13 1 -1.22 8.7
 -11 13 1 0.75 9.86
 11 13 -1 2.35 3.91
 -12 -13 1 15.95 8.22
 12 13 -1 4.52 5.6
 -12 13 1 10.16 9.51
 12 13 1 11.97 12.26
 -12 13 1 7.78 5.16
 -12 13 -1 11.09 6.23
 12 13 -1 26.15 11.85
 12 13 1 19.74 14.87
 -12 13 1 12.28 5.58
 12 13 -1 20.6 19.18
 -12 13 -1 17.18 8.81
 -12 -13 -1 6.75 3.42
 13 13 1 -5.61 10.82
 -13 13 1 1.58 6.07
 13 13 -1 9.66 10.05
 -13 13 -1 -3.52 8.75
 13 13 -1 -2 6.68
 -13 13 1 3.17 2.5
 13 13 1 0.12 2.25
 -13 13 -1 3.02 5.21
 -13 -13 -1 -3.54 6.48
 -13 -13 1 3.74 2.72
 -14 13 1 0.74 6.76
 14 13 -1 3.65 3.66
 -14 -13 1 -11.23 4.59
 14 13 -1 10.89 9.73
 14 13 1 -3.02 8.63
 14 13 1 0.76 2.36
 -14 13 -1 -2.12 9.7
 -14 13 -1 2.99 3.53
 -14 -13 -1 3.4 7.11
 -14 13 1 -1.47 4.65
 -15 13 -1 18.06 8.65
 -15 13 -1 11.38 5.29
 -15 -13 1 -0.21 6.5
 15 13 1 21.91 12.3
 15 13 -1 20.71 11.78
 -15 13 1 -2.17 10.82
 15 13 1 15.41 9.9
 15 13 -1 15.32 9.88
 -15 -13 -1 -3.99 7.32
 -15 13 1 15.7 8.46
 -15 -13 1 16.39 9.62
 16 13 -1 134.04 28.1
 16 13 1 100.31 25.57
 -16 -13 1 59.47 16.11
 -16 13 -1 140.48 28.44
 16 13 -1 143.43 28.7
 -16 13 1 90.69 23.02
 -16 13 -1 97.29 26.77
 -16 13 1 149.35 28.58
 16 13 1 144.76 31.54
 -16 -13 1 19.78 10.57
 -16 -13 -1 40.37 12.25
 -17 13 -1 2.68 6.36
 17 13 -1 11.17 8.3
 -17 13 1 -4.27 9.75
 -17 -13 1 9.04 8.17
 17 13 1 -4.06 7.38
 -17 13 1 4.2 5.87
 17 13 1 -0.71 9.31
 -17 13 -1 1.02 4.62
 17 13 -1 4.93 6.01
 -17 -13 -1 9.74 6.69
 -17 -13 -1 6.36 6.25
 -17 -13 1 1.94 6.06
 18 13 1 275.38 37.8
 -18 -13 1 19.01 6.79
 -18 13 -1 278 36.53
 18 13 -1 286.83 36.46
 18 13 -1 248.9 35.95
 -18 13 1 272.36 35.76
 -18 13 -1 180.36 34.15
 -18 13 1 151.23 28.36
 -18 -13 -1 57.83 19.66
 18 13 1 178.83 30.75
 -18 -13 -1 56.13 16.84
 -18 -13 1 79.06 18.09
 -18 -13 -1 89.31 19.3
 -19 -13 1 13.37 6.76
 -19 -13 -1 -6.68 8
 -19 -13 -1 -4.5 6.18
 19 13 -1 5.19 4.41
 -19 13 1 12.37 6.15
 -19 13 -1 0.49 4.02
 19 13 -1 -4.95 6.37
 19 13 1 16.28 4.85
 -19 13 1 -0.63 7.61
 19 13 1 22.29 9.77
 -19 13 -1 5.03 2.1
 -19 -13 -1 4.55 6.05
 -19 -13 1 -0.08 1.93
 -20 -13 1 3.57 8
 -20 13 -1 128.58 22.54
 20 13 1 45.1 13.32
 -20 13 -1 127.07 26.6
 20 13 1 125.12 22.48
 -20 -13 -1 67.2 15.92
 0 14 -1 8.86 7.5
 0 14 1 -1.32 8.51
 0 14 -1 5.44 9.62
 0 14 1 5.29 11.43
 0 14 -1 -2.94 2.62
 -1 14 1 21.35 15.48
 1 14 -1 10.82 9.58
 -1 14 -1 30.41 16.47
 1 14 -1 21.53 13.1
 -1 14 -1 18.01 12.58
 -1 14 1 22.49 11.49
 1 14 1 32.49 17.89
 1 14 1 16.09 10.06
 -1 14 -1 19.51 14.44
 1 14 -1 13.72 14.18
 -1 14 -1 19.43 13.35
 -1 14 1 18.16 9.56
 1 14 1 22.77 12.29
 -2 14 1 3.71 7.81
 2 14 -1 13.68 10.1
 2 14 -1 12.79 9.06
 2 14 1 18.48 11.11
 -2 14 -1 7 2.52
 -2 14 1 9.38 8.65
 -2 14 1 12.76 10.74
 -2 14 -1 12.7 8.07
 -2 14 -1 9.69 3.34
 2 14 -1 1.91 3.91
 -2 14 -1 0.2 7.87
 2 14 1 23.69 16.19
 2 14 1 12.88 12.48
 -3 14 1 12.8 15.31
 3 14 -1 -0.55 9.56
 -3 14 -1 2.77 5.73
 3 14 1 -4.56 8.43
 -3 14 1 7.31 10.08
 -3 14 1 8.45 10.82
 -3 14 -1 -5.71 11.12
 -3 14 -1 5.68 10.94
 -3 14 -1 3.47 8.36
 3 14 1 3.98 5.37
 3 14 -1 0.95 1.72
 3 14 1 -14.12 9.96
 4 14 -1 -9.83 10.23
 4 14 -1 -4.03 7.51
 4 14 1 -2.43 5.89
 -4 14 -1 -8.46 13.64
 -4 14 -1 2.39 8.62
 -4 14 1 12.95 11.81
 4 14 1 -7.22 10.97
 -4 14 1 -15.14 14.51
 -4 14 -1 -5.72 6.76
 4 14 1 10.87 11.52
 -4 14 -1 7.97 10.69
 -4 14 1 -1.32 10.49
 5 14 -1 -2.85 5.61
 -5 14 1 -5.31 7.65
 -5 14 1 6.18 7.28
 5 14 -1 5.27 7.32
 5 14 1 -3.73 8.1
 5 14 1 -5.98 14.08
 -5 14 -1 -1.98 7.71
 -5 14 -1 -3.78 6.42
 -5 14 -1 -3.77 10.45
 -5 14 1 -3.62 2.98
 -5 14 -1 1.86 5.66
 5 14 1 3.29 4.4
 -6 14 -1 -2.74 12.62
 6 14 -1 0.51 8.98
 -6 14 1 5.76 8.44
 -6 14 -1 3.46 9.35
 6 14 1 -0.16 6.53
 -6 14 -1 -4.56 8.82
 -6 14 1 0.07 5.73
 6 14 -1 2.12 7.02
 -6 14 -1 -5.88 8.57
 -6 14 1 7.8 6.84
 6 14 1 0.25 7.32
 -7 14 -1 11.81 9.72
 7 14 -1 15.54 10.26
 7 14 1 16.58 8.86
 -7 14 1 12.67 10.5
 -7 14 1 9.29 9.73
 -7 14 -1 12.01 7.06
 -7 14 -1 7.72 4.45
 -7 14 -1 20.69 8.45
 7 14 -1 15.4 14.23
 -7 14 1 6.66 5.94
 7 14 1 15.34 7.46
 8 14 1 -8.39 15.79
 -8 14 1 17 12.14
 -8 14 -1 5.49 3.43
 8 14 1 -0.31 3.95
 -8 14 -1 -2.84 5.48
 -8 14 1 3.58 6.63
 8 14 -1 2.07 2.48
 -8 14 -1 8.27 8.23
 -8 14 1 2 6.12
 8 14 -1 -4.12 11.55
 9 14 1 12.31 10.25
 9 14 1 13.11 4.31
 -9 14 1 7.98 10.37
 -9 14 -1 17.9 8.78
 -9 14 -1 3.26 7.14
 9 14 -1 15.05 9.62
 -9 14 1 8.08 6.01
 9 14 -1 3.41 11.6
 -9 14 1 14.62 8.4
 10 14 -1 8.05 10.06
 10 14 -1 7.1 2.6
 -10 14 1 4.8 4.63
 10 14 1 -4.73 6.58
 -10 14 -1 -3.01 6.02
 10 14 1 1.04 4.3
 -10 14 1 12 8.17
 -10 14 -1 14.54 9.9
 -11 14 1 5.71 6.05
 11 14 -1 20.58 12.89
 11 14 1 23.89 15.91
 -11 14 -1 3.48 2.47
 11 14 -1 8.05 5.31
 11 14 1 13.91 11.71
 -11 14 -1 0.09 3.45
 -11 14 1 6.18 9.8
 -11 -14 -1 6.41 5.72
 12 14 -1 26.1 14.09
 -12 14 1 3.6 2.8
 -12 14 1 -3.65 10.66
 -12 -14 -1 -0.6 6.23
 -12 14 -1 5.53 6.44
 12 14 1 5.36 5.08
 12 14 -1 7.76 6.62
 -12 14 -1 8.46 6.27
 -13 14 -1 2.17 9.5
 -13 14 1 12.37 7.53
 13 14 -1 -4.71 7.93
 13 14 1 7.42 8.01
 -13 14 -1 4.07 1.67
 -13 -14 1 -2.62 8.99
 -13 14 1 -4.68 7.79
 -13 -14 -1 -3.04 5.27
 -14 -14 1 6.03 7.29
 14 14 -1 9.51 6.55
 -14 14 1 1.32 4.79
 -14 14 1 0.3 3.46
 -14 -14 -1 -10.75 8.87
 -14 14 -1 4.13 4.35
 -14 14 -1 8.98 10.11
 14 14 1 1.5 2.49
 -15 -14 1 3.23 4.82
 15 14 -1 35.89 12.94
 15 14 1 27.6 11.47
 -15 14 -1 40.04 15.14
 -15 14 1 28.69 12.33
 -15 14 -1 23.76 9.59
 -15 14 1 37.3 13.98
 -15 -14 -1 9.9 4.9
 16 14 -1 1.89 1.53
 -16 -14 -1 -0.85 4.72
 -16 14 1 7.05 8.41
 -16 14 1 6.35 4.32
 -16 -14 -1 -4.66 5.03
 -16 -14 -1 0.59 3.56
 -16 14 -1 11.75 3.96
 -16 -14 1 8.75 8.76
 -16 14 -1 15.08 9.31
 16 14 1 -0.6 4.77
 -17 -14 1 -3.99 8.97
 -17 -14 -1 -6.39 8.55
 17 14 1 0.26 4.27
 -17 14 1 0.63 3.77
 -17 14 -1 5.1 5.11
 -17 14 -1 7.36 9.43
 -17 -14 -1 0.59 4.09
 0 15 -1 8.09 4.45
 0 15 1 1.42 5.69
 0 15 -1 10.15 10.36
 0 15 1 -6.48 5.65
 -1 15 -1 12.15 4.03
 1 15 -1 3.6 6.02
 -1 15 1 6.98 10.45
 1 15 -1 -3.86 6.63
 1 15 1 9.06 6.99
 -1 15 1 2.44 8.32
 1 15 1 0.56 6.17
 -1 15 -1 3.31 5.87
 2 15 1 9.84 8.36
 2 15 1 21.43 11.23
 -2 15 1 40.46 17.75
 2 15 -1 39.22 15.38
 -2 15 1 14.25 5.96
 -2 15 -1 16.5 7.06
 2 15 -1 15.12 5.47
 -2 15 -1 25.69 11.91
 -2 15 -1 30.14 14.19
 2 15 1 32.14 13.5
 -3 15 -1 -18.27 15.32
 3 15 -1 16.87 12.59
 -3 15 1 -6.85 7.66
 3 15 1 4.22 3.71
 -3 15 -1 -12.81 12.31
 3 15 -1 -2.93 7.52
 3 15 1 6.24 7.68
 -3 15 1 0.83 7.88
 3 15 1 3.23 6.48
 -3 15 -1 1.44 2.96
 -4 15 -1 74.12 20.64
 4 15 1 68.66 21.68
 -4 15 1 88 22.02
 -4 15 -1 143.48 27.53
 4 15 1 112.25 24.45
 -4 15 1 100.58 26.76
 -4 15 -1 119.67 27.52
 4 15 -1 69.2 21.57
 -4 15 1 73.23 22.22
 4 15 -1 126.39 27.54
 -4 15 -1 61.33 19.99
 5 15 -1 24.65 13.04
 5 15 1 20.47 11.5
 -5 15 1 2.83 11.6
 5 15 -1 18.93 10.59
 -5 15 -1 13.46 9.88
 5 15 1 21.92 12.1
 -5 15 1 10.11 4.17
 -5 15 1 16.87 9.13
 -5 15 -1 31.01 13.15
 -5 15 -1 20.68 11.35
 -5 15 -1 -0.56 7.74
 6 15 -1 26.08 13.29
 6 15 1 15.27 9.84
 -6 15 1 47.19 16.59
 -6 15 1 38.26 16.23
 6 15 -1 46.51 15.44
 -6 15 1 63.84 20.58
 -6 15 -1 69.95 20.29
 -6 15 -1 53.24 14.46
 6 15 1 59.95 18.25
 -6 15 -1 31.85 14.41
 -6 15 -1 19 5.95
 7 15 1 10.49 7.85
 -7 15 1 11.88 11.27
 7 15 1 -0.57 3.55
 -7 15 1 -12.43 8.15
 7 15 -1 -10.9 7.85
 7 15 -1 1.85 11.48
 -7 15 -1 -2.39 5.43
 -7 15 1 -4.2 5.69
 -7 15 -1 4.5 4.56
 8 15 -1 10.84 7.04
 8 15 1 70.72 20.87
 -8 15 1 43.53 14.98
 -8 15 1 71.57 20
 8 15 -1 65.74 18.17
 8 15 1 91.69 22.81
 -8 15 1 51.93 16.92
 -8 15 -1 69.04 18.23
 9 15 1 -10.57 10.49
 9 15 -1 -4.06 5.83
 9 15 1 6.26 4.01
 -9 15 -1 -2.17 7.57
 -9 15 1 5.53 7.54
 9 15 -1 3.78 8.1
 -9 15 1 -3.75 5.84
 -9 -15 -1 -4.71 7.09
 10 15 -1 25.92 16.59
 10 15 1 45.04 16.06
 -10 15 -1 51.72 17.12
 -10 15 1 36.29 13.36
 10 15 -1 51.42 16.37
 -10 -15 -1 10.49 7.41
 -10 15 1 13.94 5.23
 10 15 1 12.77 3.39
 -11 -15 1 -7.42 6.25
 11 15 -1 3.83 4.52
 11 15 1 4.29 4.51
 -11 15 1 4.77 3.06
 -11 15 -1 -1.61 2.26
 11 15 -1 -9.03 6.23
 -11 15 1 5.99 2.09
 -11 -15 -1 7.14 5.28
 -12 15 -1 6.32 5.55
 12 15 -1 8.32 5.82
 12 15 1 0.96 4.02
 -12 15 -1 1.72 6.82
 -12 15 1 -0.73 2.53
 -12 15 1 0.51 3.25
 -12 -15 1 3.56 5.52
 -12 -15 -1 3 4.69
 13 15 -1 -3.8 4.86
 13 15 1 0.89 3.79
 -13 15 1 3.12 5.78
 -13 -15 1 -0.96 5.69
 -13 15 -1 0.69 3.92
 -13 15 1 6.25 7.69
 14 15 -1 17.9 9.11
 14 15 1 -0.59 3.6
 -14 15 1 11.81 6.42
 0 16 1 1.49 5.48
 0 16 1 -9.53 11.8
 0 16 -1 -12.77 9.13
 0 16 -1 -18.4 9.75
 -1 16 -1 14.72 10.98
 1 16 1 13.82 10.36
 -1 16 -1 16.94 10.51
 1 16 -1 3.12 7.36
 -1 16 1 14.34 9.13
 -1 16 1 -1.39 7.54
 1 16 -1 18.86 13.18
 -2 16 1 12.16 6.14
 2 16 -1 8.89 6.92
 2 16 1 -4.11 9.58
 -2 16 1 6.88 5.55
 2 16 -1 20.88 9.87
 -2 16 -1 24.49 11.81
 -2 16 -1 9.97 5.59
 3 16 1 10.12 7.55
 3 16 -1 1.72 9.56
 -3 16 1 -2.11 3.47
 3 16 -1 8.88 5.71
 -3 16 1 11.9 9.78
 -3 16 -1 6.17 7.53
 -3 16 -1 11.93 8.42
 4 16 -1 43.51 16.85
 4 16 1 57.32 18.13
 -4 16 -1 82.62 17.66
 4 16 -1 92.5 21.23
 4 16 1 63.63 14.63
 -4 16 1 62.02 18.55
 -4 16 -1 68.84 21.17
 -4 16 1 73.11 19.01
 -5 16 -1 0.44 4.78
 5 16 -1 -16.66 11.22
 5 16 1 2.95 2.79
 -5 16 1 9.34 3.86
 -5 16 1 -5.5 5.45
 5 16 -1 -3.42 6.76
 5 16 1 0.12 7.04
 -6 16 -1 17.83 13.15
 6 16 1 35.28 14.63
 -6 16 1 -0.48 3.74
 6 16 -1 23.97 15.4
 6 16 -1 47.68 14.83
 6 16 1 26.46 9.97
 -6 16 1 16.41 4.93
 7 16 -1 -1.18 11.21
 7 16 1 -3.02 4.86
 7 16 1 -13.77 10.37
 -7 16 1 -5.71 8.85
 7 16 -1 10.29 8.58
 8 16 -1 57.62 14.93
 -8 16 1 34.49 13.36
 9 16 -1 22.44 9.6
 0 0 2 2798.42 120.47
 0 0 -2 2668.73 112.61
 0 0 2 2903.76 113.21
 1 0 2 1349.19 86.06
 1 0 -2 1550.88 65.1
 1 0 -2 1497 84.86
 -1 0 -2 1480.69 54.04
 -1 0 2 1568.29 85.65
 1 0 2 1594.13 81.99
 1 0 -2 1509.5 56.89
 1 0 2 1402.47 89.04
 2 0 2 2250.58 96.42
 2 0 -2 1911.02 97.37
 -2 0 -2 2147.19 67.75
 -2 0 -2 2026.17 85.21
 2 0 -2 2216.15 65.87
 -2 0 -2 1838.08 95.42
 -2 0 2 2064.71 101.21
 2 0 2 2013.51 110.58
 2 0 2 2295.53 86.48
 2 0 -2 2234.99 68.58
 -3 0 2 274.22 37.86
 -3 0 -2 224.92 23.67
 3 0 2 264.45 28.36
 -3 0 -2 179.49 30.88
 -3 0 -2 231.52 33.23
 3 0 -2 262.26 24.37
 -3 0 -2 223.89 27.06
 3 0 2 196.17 35.51
 3 0 -2 190.39 36.32
 3 0 2 218.73 36.4
 -4 0 2 44.82 16.07
 4 0 2 48.05 12.17
 4 0 -2 30.12 15.37
 -4 0 -2 58.7 17.13
 -4 0 -2 43.19 11.32
 4 0 -2 50.22 11.94
 -4 0 -2 38.42 15.49
 -4 0 -2 46.9 13.28
 4 0 2 47.96 17.09
 4 0 2 38.1 14.68
 -4 0 -2 64.76 19.91
 5 0 -2 18.97 7.24
 -5 0 -2 26.75 14.32
 -5 0 -2 12.1 5.89
 -5 0 -2 12.57 10.19
 5 0 2 14.14 11.87
 -5 0 2 11.17 6.87
 5 0 2 26.97 9.81
 5 0 2 13.45 10.56
 5 0 -2 16.44 12.48
 -5 0 -2 24.98 9.56
 -5 0 -2 22.85 11.52
 -6 0 -2 19.48 9.94
 6 0 2 24.72 14.23
 6 0 2 17.97 12.26
 -6 0 -2 12.75 9.53
 -6 0 2 30.64 10.56
 6 0 -2 32.5 16.34
 -6 0 -2 25.74 11.44
 6 0 2 33.08 9.61
 6 0 -2 27 10.23
 -6 0 2 19.69 10.5
 6 0 2 24.37 13.06
 -6 0 -2 24.26 12.65
 6 0 -2 -1.23 5.37
 -7 0 -2 29.71 10.55
 7 0 2 34.54 16.31
 7 0 2 36.55 18.89
 -7 0 2 36.02 15.61
 -7 0 2 31.06 10.93
 7 0 -2 24.3 12.43
 7 0 -2 44.73 18.25
 -7 0 -2 24.22 11.32
 7 0 2 25.68 12.35
 -7 0 -2 27.11 13.51
 -7 0 -2 25.92 9.46
 7 0 2 33.45 13.05
 -8 0 2 406.21 39.27
 8 0 2 382 57.44
 -8 0 -2 337.54 52.03
 8 0 -2 527.21 53.62
 -8 0 2 390.99 54.2
 8 0 -2 453.49 60.37
 8 0 2 460 50.91
 -8 0 -2 377.07 44.35
 -8 0 -2 389.65 60.54
 -8 0 -2 326.12 41.43
 8 0 2 347.27 58.31
 8 0 2 398.47 60.8
 -9 0 -2 263.88 47.77
 9 0 -2 345.84 56.18
 -9 0 -2 202.21 44.26
 -9 0 2 300.3 47.98
 9 0 -2 374.11 48.34
 9 0 2 268.78 48.51
 -9 0 -2 260.15 39.48
 9 0 2 345.89 44.55
 9 0 2 274.96 54.24
 9 0 2 271.41 52.94
 -10 0 -2 3345.35 178.41
 10 0 -2 4370.91 206.38
 10 0 2 4155.52 163.45
 -10 0 2 4373.61 178.78
 -10 0 -2 3274.18 151.62
 10 0 2 3599.99 207.39
 -10 0 2 4517.34 161.45
 -10 0 -2 3301.54 190.18
 -10 0 2 3829.41 177.18
 10 0 -2 3953.03 201.43
 10 0 2 3886.38 198.27
 10 0 2 3410.26 200.22
 10 0 -2 4628.25 177.09
 11 0 2 26.86 21.43
 11 0 2 21.06 12.21
 -11 0 -2 16.85 16.68
 -11 0 -2 15.98 13.88
 -11 0 2 21.51 16.68
 -11 0 -2 4.11 5.5
 11 0 2 1.26 10.78
 11 0 2 31.53 20.85
 11 0 -2 14.83 12.34
 -11 0 2 27.45 15.02
 11 0 -2 14.82 12.47
 11 0 -2 33.33 19.49
 -12 0 2 587.3 84.25
 -12 0 -2 474.82 78.05
 12 0 -2 651.71 86.58
 -12 0 -2 521.84 68.96
 12 0 -2 535.83 67.95
 -12 0 -2 434.54 74.05
 -12 0 2 639.07 76.97
 12 0 2 570.09 84.06
 12 0 -2 662.34 88.41
 12 0 2 442.2 79.84
 12 0 2 455.06 79.84
 -13 0 -2 95.57 35.79
 13 0 2 48.33 27.6
 13 0 2 67.4 30.77
 -13 0 2 69.46 27.25
 -13 0 -2 103.02 34.23
 13 0 2 66.45 29.46
 13 0 -2 116.57 40.16
 13 0 2 91.44 38.27
 -13 0 -2 68.53 27.66
 -13 0 2 115.44 39.57
 13 0 -2 91.27 32.96
 14 0 2 463.58 83.97
 14 0 -2 457.32 80.71
 -14 0 -2 471.73 73.64
 14 0 2 275.75 64.31
 -14 0 -2 404.68 77.28
 14 0 2 475.15 90.75
 -14 0 2 437.74 69.6
 -14 0 2 501.68 84
 14 0 -2 393.7 82.49
 14 0 2 349.16 75.75
 15 0 2 190.89 61.5
 15 0 -2 175.94 52.73
 -15 0 2 205.46 55.14
 -15 0 -2 174.37 51.03
 -15 0 2 188.9 47
 15 0 -2 186.77 58.62
 15 0 2 232.07 67.83
 -15 0 -2 213.72 52.77
 -16 0 2 463.35 76.39
 16 0 -2 633.87 100.22
 -16 0 -2 615 97.04
 -16 0 2 517.93 93.85
 16 0 -2 649.29 108.85
 -16 0 -2 547.74 97.59
 16 0 2 546.49 104.78
 -17 0 -2 60.79 31.08
 -17 0 -2 31.2 14.66
 17 0 -2 27.72 24.07
 -17 0 2 12.74 6.53
 -17 0 -2 31.92 11.17
 17 0 2 74.97 43.97
 -17 0 2 29.19 11.43
 17 0 -2 26.27 14.22
 -18 0 -2 40.94 18.9
 18 0 -2 37.14 20.2
 -18 0 2 45.45 28.75
 -18 0 2 30.69 13.36
 -18 0 -2 41.46 20.02
 -18 0 -2 25.46 12.37
 -18 0 -2 16.1 9.35
 18 0 -2 39.47 16.74
 -18 0 2 14.8 6.04
 -18 0 -2 18.86 23.25
 18 0 -2 29.88 29.37
 18 0 -2 17.39 17.64
 18 0 2 20.04 7.57
 -18 0 -2 17.84 7.47
 18 0 2 27.46 12.39
 18 0 2 53.39 19.18
 -18 0 -2 34.23 16.59
 18 0 2 26.51 13.32
 -18 0 2 44.32 13.45
 -18 0 -2 50.21 18.66
 -18 0 2 30.39 12.86
 18 0 2 19.58 4.04
 19 0 -2 73.3 24.12
 -19 0 -2 75.92 24.86
 -19 0 -2 62.3 20.16
 -19 0 -2 65.7 36.98
 -19 0 -2 65.79 23.58
 19 0 -2 8.52 4.11
 -19 0 -2 69.78 23.46
 -19 0 -2 71.48 20.11
 19 0 2 71.18 25.82
 19 0 -2 67.5 23.39
 -19 0 2 67.41 20.47
 -19 0 -2 55.59 19.33
 -19 0 2 58.64 18.76
 -19 0 2 88.55 21.61
 -19 0 -2 69.28 24.32
 19 0 -2 63.66 38.57
 -19 0 2 79.94 20.33
 19 0 2 60.34 38.11
 19 0 2 79.98 30.45
 19 0 2 48.51 25.6
 19 0 2 80.4 21.42
 20 0 2 150.72 34.11
 -20 0 -2 175.05 34.63
 -20 0 -2 136.74 31.46
 -20 0 -2 133.53 34.56
 20 0 -2 117.35 30.76
 -20 0 -2 116.74 34.33
 -20 0 -2 132.45 31.94
 20 0 -2 129.87 34.9
 20 0 2 124.49 33.97
 -20 0 2 170.52 32.64
 -20 0 -2 185.14 40.24
 20 0 -2 123.26 31.4
 20 0 2 53.67 17.59
 20 0 2 125.02 34.69
 -20 0 2 123.65 27.92
 -20 0 2 126.75 28.69
 -20 0 -2 125.86 31.63
 -20 0 2 117.6 24.35
 -21 0 -2 203.21 44.78
 21 0 2 83.82 31.18
 -21 0 -2 155.09 34.41
 21 0 -2 99.65 27.98
 21 0 -2 96.35 30.61
 -21 0 -2 133.16 29.37
 21 0 -2 52.62 20.46
 21 0 2 94.39 30.72
 -21 0 -2 140.48 34.69
 -21 0 2 122.47 30.07
 -21 0 -2 120.57 35.54
 21 0 2 87.75 32.44
 21 0 2 191.86 40.95
 -21 0 2 121.44 26.92
 -21 0 -2 131.87 31.51
 -21 0 2 108.99 26.83
 -21 0 2 123.52 28.02
 -22 0 2 266.66 42.49
 22 0 2 308.95 49.14
 22 0 -2 188.83 41.84
 22 0 -2 188.12 36.9
 -22 0 -2 256.03 47.68
 22 0 2 201.52 43.83
 -22 0 -2 233.65 52.05
 22 0 2 203.16 46.63
 -22 0 -2 318.18 56.39
 22 0 -2 193.58 44.9
 -22 0 2 260.21 41.88
 -22 0 -2 276.49 50.41
 22 0 2 210.67 48.95
 -22 0 -2 286.68 49.48
 -22 0 2 255.55 39.58
 -22 0 -2 256.74 44.89
 22 0 -2 204.1 38.73
 -22 0 2 232.87 38.92
 -23 0 -2 4.58 10.76
 -23 0 -2 15.52 11.62
 23 0 2 -0.14 7.51
 -23 0 -2 12.47 11.12
 -23 0 -2 7.51 3.47
 -23 0 2 0.7 6.38
 23 0 -2 5.71 3.39
 23 0 2 3.81 9.04
 23 0 -2 -1.25 5.28
 23 0 -2 4.9 8.38
 23 0 2 19.19 14.98
 23 0 2 -5.4 14.21
 -23 0 -2 1.17 2.72
 -23 0 2 5.96 3.1
 -23 0 2 4.89 4.03
 -23 0 2 8.4 6.74
 23 0 -2 7.5 6.8
 24 0 -2 264.46 43.12
 -24 0 -2 358.44 55.47
 -24 0 -2 385.97 55.72
 -24 0 2 310.99 44.32
 -24 0 -2 368.74 53.87
 24 0 2 205.8 41.5
 24 0 2 226.16 48.38
 -24 0 2 293.07 47.77
 24 0 -2 192.81 39.68
 24 0 -2 191.81 43.48
 24 0 -2 248.29 48.52
 24 0 2 249.94 52.4
 -24 0 -2 344.88 54.57
 24 0 2 295.44 55.09
 -24 0 2 281.15 44.91
 -24 0 2 289.92 45.07
 -25 0 2 21.91 8.46
 -25 0 -2 24.92 14.13
 25 0 -2 22.47 14.22
 25 0 -2 14.06 9.78
 25 0 2 24.59 14.23
 -25 0 -2 28.43 17.4
 25 0 2 0.23 10.75
 -25 0 2 34.08 14.49
 -25 0 -2 37.05 15.9
 25 0 -2 4.56 5.36
 -25 0 -2 28.19 15.95
 25 0 2 35.78 20.31
 25 0 2 12.52 8.85
 25 0 -2 8.54 8.58
 -25 0 2 25.77 14.37
 -25 0 2 17.67 10.75
 -26 0 2 103.45 23.81
 -26 0 2 150.35 31.65
 26 0 -2 90.98 23.11
 -26 0 -2 165.89 35.81
 26 0 2 103.21 30.11
 -26 0 -2 142.67 29.92
 26 0 2 78.15 25.43
 26 0 -2 98.49 27.83
 26 0 -2 119.16 30.45
 26 0 2 58.03 18.07
 -26 0 2 184.08 35.09
 26 0 2 63.32 20.24
 26 0 2 140.05 37.27
 -26 0 -2 178.89 39.77
 26 0 -2 80.88 25.82
 -26 0 2 130.29 27.93
 -26 0 -2 193.6 40.77
 -27 0 2 14.48 10.21
 27 0 -2 4.51 5.19
 27 0 2 14.97 15.84
 -27 0 2 29.32 13.96
 27 0 2 -3.47 11.95
 27 0 -2 16.13 12.03
 -27 0 -2 19.88 8.84
 -27 0 -2 21.7 9.76
 -27 0 2 32.14 13.6
 -27 0 -2 24.09 14.91
 27 0 -2 5.73 6.58
 27 0 2 4.26 5.34
 -27 0 -2 24.71 13.01
 27 0 2 3.71 12.35
 27 0 2 8.46 3.33
 -27 0 2 23.36 14.95
 -28 0 2 73.41 18.35
 -28 0 -2 109.13 29.13
 -28 0 -2 55.22 22.48
 -28 0 2 66.08 19.37
 28 0 -2 62.13 21.44
 28 0 -2 23.09 10.93
 -28 0 -2 89.12 24.41
 28 0 2 40.36 17.42
 28 0 2 52.71 20.92
 28 0 2 38.07 14.96
 -28 0 2 99.32 25.04
 28 0 2 32.74 13.49
 28 0 2 30.98 13.39
 28 0 -2 23.51 12.39
 -28 0 2 65.66 18.83
 -28 0 -2 89.43 22.56
 29 0 2 13.36 10.82
 -29 0 2 17.95 9.07
 -29 0 -2 8.67 7.74
 29 0 -2 21.94 11.09
 -29 0 -2 14.51 5.32
 29 0 -2 18.78 12.24
 29 0 2 9.61 8.75
 -29 0 -2 13.45 7.45
 29 0 -2 18.09 12.69
 -29 0 2 22.51 10.15
 -29 0 2 23.31 9.7
 -29 0 2 32.56 15.03
 -29 0 -2 12.24 6.16
 -29 0 -2 17.29 10.57
 29 0 2 3.56 10.04
 -30 0 2 1.99 3.04
 30 0 -2 19.87 6.95
 30 0 -2 4.87 6.29
 -30 0 2 32.56 14.01
 30 0 -2 6.89 4.63
 30 0 2 15.89 8.7
 30 0 2 6.11 7.66
 -30 0 -2 8.92 4.61
 -30 0 -2 21.52 12.63
 30 0 2 16.13 7.11
 -30 0 -2 28.31 13.68
 -30 0 2 16.46 6.56
 -30 0 -2 18.08 5.42
 -31 0 2 2.94 4.36
 -31 0 -2 0.34 5.28
 31 0 -2 9.51 5.71
 31 0 -2 8.91 6.7
 31 0 2 12.87 9.29
 31 0 -2 14.96 9.78
 31 0 2 -2.01 8.39
 31 0 2 3.94 3.39
 -31 0 -2 26.07 13.26
 -31 0 2 14.47 5.51
 -31 0 2 26.91 12.22
 0 1 2 1385.11 84.82
 0 -1 -2 1449.85 78.13
 0 1 -2 1247.52 69.23
 0 -1 -2 1256.9 79.03
 0 1 -2 1350.73 76.91
 0 -1 2 1436.56 78.16
 0 1 -2 1316.01 78.55
 0 -1 2 1288.38 86.75
 0 -1 -2 1474.76 89.47
 0 -1 2 1180.78 80.1
 0 1 -2 1496.05 83.71
 1 -1 -2 23.22 11.74
 1 1 2 24.74 11.89
 -1 1 2 9.33 7.68
 -1 1 -2 32.68 10.71
 -1 -1 2 21.83 10.88
 1 1 2 26.12 12.81
 -1 -1 -2 29.74 12.31
 1 1 -2 18.55 9.99
 1 1 -2 24.49 11.32
 -1 -1 -2 31.65 10.16
 1 1 -2 31.98 11.39
 -1 -1 -2 24.16 11.57
 1 -1 2 29.41 10.3
 1 -1 -2 16.1 9.62
 -1 1 -2 24.4 9.9
 -1 1 -2 27.26 11.46
 -1 1 2 24.12 12.38
 1 -1 2 16.43 9.53
 1 -1 -2 26.59 12.32
 -1 -1 2 28.08 10.94
 1 1 -2 27.32 12.06
 -1 -1 2 27.28 13.12
 1 -1 2 17.49 10.28
 -1 1 -2 16.73 9.78
 1 1 2 21.07 7.79
 1 1 -2 25.39 10.45
 -2 1 -2 151.22 23.63
 2 1 -2 139.96 20.05
 2 1 -2 85.4 25.26
 2 1 2 154.68 26.25
 2 -1 -2 120.98 26.66
 -2 -1 2 146 27.71
 -2 1 -2 132.89 25.01
 2 1 2 125.58 27.22
 -2 -1 -2 116.05 25.61
 2 1 2 131.47 27.14
 2 -1 2 151.21 23.53
 -2 1 -2 157.59 30.48
 -2 -1 2 145.14 29.4
 2 1 -2 132.39 22.03
 2 1 -2 137.98 22.54
 2 -1 -2 117.51 24.96
 -2 -1 2 164.12 28.56
 -2 1 2 139.1 28.13
 -2 -1 -2 139.06 21.73
 -2 -1 -2 135.09 27.66
 -2 1 -2 116.66 21.88
 2 -1 2 127.77 27.19
 2 -1 2 125.48 27.33
 -2 1 2 152.43 25.69
 -3 1 -2 306.39 20.52
 3 1 2 349.46 47.45
 3 1 -2 444.51 40.19
 3 -1 2 350.01 46.3
 -3 1 -2 416.94 41.49
 -3 -1 2 415.39 45.4
 3 1 2 395.81 49.94
 3 1 -2 333.56 43.26
 -3 1 -2 406.12 47.42
 -3 -1 -2 361.08 37.16
 3 -1 2 403.75 36.73
 -3 1 2 391.37 47.46
 -3 -1 2 459.73 48.55
 3 -1 -2 444.68 50.32
 -3 -1 -2 407.23 47.88
 3 -1 2 360.19 49.31
 -3 -1 -2 400.28 47.62
 -3 1 -2 453.98 52.79
 -3 -1 -2 381.67 35.18
 3 1 -2 383.18 36.48
 3 -1 -2 339.97 40.59
 -3 -1 -2 376.92 36.85
 -3 1 -2 367.07 39.51
 -3 1 2 458.07 43.6
 3 1 2 448.99 45.29
 -4 -1 -2 75.68 21.77
 -4 1 2 93.86 18.69
 -4 1 2 105.33 19.67
 -4 -1 2 95.37 21.4
 4 -1 -2 83.39 22.45
 4 -1 2 104.99 18.52
 4 1 -2 123.67 19.97
 4 1 -2 91.72 23.61
 4 1 2 103.17 22.09
 -4 -1 -2 93.9 20.04
 -4 -1 -2 85.76 22.85
 4 -1 -2 63.27 8.26
 -4 1 -2 83.86 23.14
 4 -1 2 86.42 22.61
 -4 1 -2 70.52 20.84
 -4 -1 2 94.2 22.76
 4 1 2 96.2 25.45
 -4 1 2 96.32 24.34
 -4 -1 -2 94.48 15.88
 4 1 -2 117.77 20.69
 4 -1 -2 71.15 18.7
 4 1 2 74.89 22.58
 -4 1 -2 116.67 22.85
 -4 1 -2 92.44 13.91
 4 -1 2 71.98 22.01
 -5 1 -2 300.92 38.32
 5 -1 -2 212.18 19.99
 -5 1 2 257.56 31.41
 -5 -1 -2 211.91 36.6
 5 1 -2 249.22 39.38
 5 -1 -2 203.61 42.03
 5 -1 2 212.64 20.23
 5 -1 2 200.11 37.52
 -5 1 2 260.1 40.5
 -5 1 -2 216.39 24.61
 -5 -1 -2 204.98 36.01
 -5 -1 -2 286.61 38.33
 5 1 -2 295.2 31.76
 -5 -1 -2 240.14 24.66
 5 -1 -2 257.56 38.69
 -5 -1 2 226.82 36.68
 -5 1 -2 237.26 41.58
 -5 1 2 249.62 31.28
 -5 -1 2 238.86 34.17
 5 1 -2 305.96 34.44
 5 1 2 219.03 41.96
 5 -1 2 196.97 38.42
 5 1 2 244.64 40.11
 5 1 2 219.11 32.84
 5 1 2 221.36 40.86
 6 1 2 7.77 6.91
 -6 -1 2 4.63 5.46
 -6 1 2 7.73 6.78
 -6 1 2 6.57 5.81
 6 -1 -2 0.09 2.85
 6 -1 2 6.76 5.87
 -6 -1 -2 6.59 2.36
 6 1 2 8.43 5.78
 -6 -1 -2 5.1 9.51
 6 1 -2 13.21 8.2
 -6 -1 -2 6.84 6.75
 6 1 2 7.52 8.3
 -6 1 2 6.02 3.69
 -6 -1 2 9.74 7.94
 6 -1 -2 7.64 10.62
 -6 1 -2 0.13 7.39
 -6 1 -2 1.76 2.47
 6 1 2 1.2 2.52
 6 1 -2 6.05 2.4
 -6 -1 -2 1.37 1.97
 -6 1 -2 8.08 4.99
 6 -1 2 5.99 2.59
 6 1 -2 9.3 7.9
 -6 1 -2 16.12 9.49
 -6 -1 -2 5.01 8.98
 6 -1 2 -1.33 4.42
 -7 1 2 73.08 16.68
 -7 1 2 69.28 14.9
 -7 -1 -2 52.61 17.86
 -7 -1 2 71.92 19.37
 7 1 2 64.64 24.8
 7 -1 2 59.55 22.84
 7 1 2 57.15 20.68
 7 1 -2 79.93 23.76
 7 -1 2 58.94 21.48
 7 -1 2 53.53 11.82
 -7 -1 -2 57.31 13.7
 -7 1 -2 34.78 20.73
 7 1 -2 64.15 15.98
 -7 -1 2 70.24 22.36
 7 -1 -2 62.14 24.23
 7 1 -2 80.45 21.93
 7 1 2 79.4 21.58
 7 -1 2 53.08 20.2
 7 -1 -2 67.06 21.89
 -7 1 2 73.69 19.84
 -7 -1 -2 40.38 13.71
 -7 -1 -2 52.69 20.62
 -7 1 -2 53.3 18.9
 -7 -1 -2 70.23 23.71
 -7 1 2 59.29 20.89
 -7 1 -2 64.08 20.84
 7 1 2 44.73 20.66
 8 -1 2 7.32 9.64
 8 -1 2 1.06 2.53
 8 1 2 -0.87 7.59
 -8 1 -2 4.12 2.64
 8 1 2 9.16 3.44
 8 -1 2 10.47 7.32
 -8 -1 2 1.97 3.86
 8 1 2 1.56 3.44
 -8 1 2 6.07 9.56
 -8 1 -2 1.07 10.13
 -8 -1 2 0.11 4.62
 8 1 2 -0.34 7.73
 -8 1 -2 9.86 5.48
 8 -1 -2 2.27 5.44
 -8 -1 -2 4.12 3.31
 -8 1 2 0.84 7.79
 8 -1 -2 -3.44 5.57
 -8 -1 -2 0.38 5.32
 -8 1 -2 -0.79 6.76
 -8 -1 -2 -0.51 9.46
 8 -1 2 4.91 8.47
 8 1 -2 -1.34 7.63
 -8 -1 -2 -2.1 5.47
 8 1 -2 4.45 5.47
 -9 -1 -2 95.1 24.63
 9 -1 2 62.63 26.72
 9 -1 2 92.93 28.69
 -9 1 -2 81.73 29.91
 9 1 2 102.05 26.96
 9 -1 -2 114.66 33.3
 9 -1 -2 98.74 29.47
 9 -1 2 67.82 24.15
 -9 1 2 77.45 26.08
 -9 -1 -2 96.47 30.33
 9 1 2 88.03 27.45
 9 1 2 86.01 30.13
 -9 -1 2 90.61 26.19
 -9 -1 2 96.91 21.65
 9 1 -2 92.13 27.78
 -9 1 -2 85.87 26.03
 -9 1 2 100.39 28.52
 9 -1 -2 72.77 27.83
 -9 -1 -2 86.61 25.3
 -9 1 2 85.46 23.3
 9 1 2 75.64 31.34
 -9 1 -2 95.99 25.05
 -10 1 2 16.5 12.39
 10 -1 2 16.41 18.89
 10 1 2 8.23 11.96
 -10 -1 -2 21.31 13.91
 10 -1 2 11.94 13.72
 -10 1 2 11.66 9.6
 10 1 2 12.39 6.56
 10 -1 -2 12.1 13.29
 -10 1 -2 11.93 9.3
 -10 1 -2 9.56 8.44
 10 1 -2 9.07 9.22
 -10 1 -2 9.19 9.64
 10 -1 -2 13.12 15.16
 -10 1 2 26.6 15.26
 -10 -1 2 14.17 3.98
 -10 -1 -2 8.5 8.76
 10 -1 -2 10.29 13.07
 -10 1 2 15.47 13.06
 10 1 2 11.67 9.99
 -10 -1 -2 22.25 18.49
 10 1 2 2.76 7.55
 10 -1 2 14.27 13.7
 11 1 2 43.68 22.86
 11 -1 2 38.89 23.35
 11 1 2 51.17 24.38
 -11 1 -2 41.45 22.44
 11 1 2 36.31 17.42
 11 -1 -2 50.75 27.92
 -11 -1 -2 41.67 21.93
 -11 1 -2 32.44 18.54
 11 1 -2 51.16 23.82
 -11 1 -2 33.22 17.48
 11 -1 -2 44.3 24.43
 -11 -1 2 54 22.29
 -11 -1 -2 31.43 17.22
 -11 1 2 34.4 19.9
 11 -1 -2 53.25 25.81
 11 1 2 35.92 20.02
 -11 1 2 32.24 14.45
 -11 -1 -2 40.42 24.41
 11 -1 2 38.43 24.08
 -11 1 2 35.11 15.89
 11 -1 2 34.19 17.48
 12 -1 2 843.54 96.73
 -12 1 2 806.77 89.05
 -12 -1 -2 618.16 88.4
 12 -1 2 718.15 98.66
 -12 1 2 767.21 85.58
 -12 -1 -2 759.74 91.95
 12 -1 -2 814.54 104.81
 12 1 2 868.08 107.65
 -12 1 -2 627.78 89.98
 -12 1 2 675.91 93.9
 -12 -1 -2 679.29 92.24
 12 1 2 508.02 76.58
 12 -1 -2 763.88 93.03
 12 1 -2 856.97 94.56
 12 -1 2 711.89 100.41
 12 1 2 722.58 97.97
 12 -1 -2 675.64 107
 12 1 2 620.62 98.78
 12 1 2 763.24 89.65
 -12 -1 2 850.21 91.23
 13 1 2 64.62 31.69
 13 1 2 104.86 38.11
 13 1 2 77.62 25.52
 -13 -1 -2 74.97 31.47
 -13 1 -2 70.65 30.18
 -13 -1 -2 94.79 36.34
 -13 -1 -2 102.16 32.86
 13 -1 -2 81.95 36.03
 -13 1 2 81.11 29.64
 13 -1 -2 88.82 34.46
 13 -1 -2 78.84 33.78
 13 1 -2 100.87 34
 -13 -1 2 81.21 27.32
 13 -1 2 120.46 39.76
 -13 1 2 91.37 33.67
 13 -1 2 69.15 32.31
 13 -1 2 93.3 34.65
 14 -1 -2 536.97 86.41
 -14 -1 -2 527.86 89.85
 14 1 2 546.02 93.84
 14 1 -2 715.02 94.15
 14 -1 -2 608.43 99.25
 14 -1 2 492.45 89.55
 -14 -1 -2 476.85 83.35
 14 -1 2 431.19 81.88
 -14 -1 2 627.57 85.11
 -14 1 2 478.78 82.07
 -14 -1 2 656.73 100.43
 -14 -1 -2 526.14 84.72
 -14 1 -2 469.16 84.46
 14 1 -2 677 97.63
 -14 1 2 595.14 79.91
 14 -1 -2 452.27 86.85
 14 1 2 508.25 100.1
 14 1 2 569.49 82.88
 14 -1 2 648.8 102.03
 15 1 2 224.72 62.19
 15 -1 2 215.07 60.32
 15 -1 -2 213.11 59.28
 -15 1 -2 195.05 55.7
 15 1 -2 259.55 59.22
 15 -1 2 168.36 53.32
 -15 -1 2 231.29 62.06
 -15 1 2 238.8 52.51
 -15 -1 -2 236.89 56.2
 -15 -1 2 201.05 48.81
 -15 -1 -2 219.34 58.57
 -15 1 2 191.31 52.41
 15 -1 2 241.82 64.79
 15 1 -2 244.13 62.48
 15 -1 -2 221.37 64.68
 16 1 2 64.68 34.75
 16 -1 2 66.79 35.45
 16 -1 2 9.91 7.27
 -16 1 -2 55.12 29.2
 -16 1 2 44.73 25.26
 -16 -1 2 92.22 41.18
 -16 1 2 81.86 37.27
 -16 -1 2 66.05 27.05
 16 -1 -2 69.52 35.21
 16 -1 2 51.01 29.35
 -16 -1 -2 68.93 30.66
 16 -1 -2 54.38 25.57
 -16 -1 -2 53.97 30.17
 16 1 -2 69.24 28.45
 17 -1 2 21.86 9.24
 -17 -1 2 31 14.22
 -17 -1 -2 37.9 20.07
 -17 1 -2 18.85 16.73
 17 -1 2 52.71 35.9
 -17 1 2 79.01 37.64
 17 -1 -2 48.05 28.64
 -17 1 -2 37.53 13.85
 17 1 -2 42.09 25.94
 -17 1 -2 20.56 10.08
 -17 -1 -2 71.79 36.84
 -17 -1 2 76.43 39.34
 -17 1 -2 25.43 24.35
 -17 1 2 25.62 11.75
 17 1 2 62.84 26.02
 17 1 2 28.62 14.98
 -17 1 -2 12.71 4.73
 -17 -1 -2 38.98 15.48
 -17 1 2 24.24 10.07
 17 1 -2 39.24 18.11
 -17 -1 2 38.39 22.53
 17 1 -2 30.75 15.98
 -17 -1 -2 30.43 12.79
 -17 1 -2 43.03 20.63
 17 -1 -2 41.12 28.11
 -17 -1 2 26.35 13.11
 17 1 2 34.35 30.51
 -18 -1 2 26.97 12.83
 18 1 2 30.07 12.88
 -18 1 -2 31.2 15.07
 18 -1 -2 33.32 31.47
 -18 1 -2 11.91 7.15
 18 1 -2 39.24 16.76
 -18 -1 -2 31.96 15.99
 -18 1 -2 12.66 8.23
 -18 -1 -2 18.85 5.99
 -18 -1 -2 16.55 8.19
 18 1 -2 11.49 7.9
 -18 1 2 25.33 11.89
 18 1 -2 26.32 19.22
 -18 -1 -2 31.97 16.29
 18 1 2 47.31 28.11
 18 1 -2 32.11 18.82
 18 -1 2 14.16 9.2
 -18 -1 -2 26.24 19.17
 -18 1 -2 31.36 26.02
 -18 1 -2 22.69 11.66
 -18 -1 -2 28.66 14.42
 18 -1 -2 14.47 4.65
 18 1 2 18.77 11.54
 18 1 2 12.01 4.26
 18 -1 2 31.28 14.14
 -18 -1 2 29.18 13.59
 18 -1 -2 34.81 16.35
 18 1 -2 23.48 13.28
 -18 -1 2 21.29 10.47
 -18 -1 2 18.12 9.34
 -18 1 -2 3.09 17.94
 18 1 2 18.42 11.36
 -18 -1 -2 29.03 12.79
 -18 -1 2 14.51 5.73
 18 1 2 7.52 11.8
 18 1 -2 30.41 17.09
 -18 1 2 21.67 11.6
 -18 1 2 20.03 10.67
 -18 1 -2 45.8 19.56
 -18 1 2 10.02 2.72
 -18 -1 2 34.4 14.47
 -18 -1 -2 29.39 18.65
 -18 1 -2 18.63 11.74
 18 -1 -2 29.54 34.02
 18 -1 2 -8.43 19.2
 -18 1 2 5.51 10.08
 -19 1 2 102.41 24.62
 -19 1 -2 62.79 24.14
 -19 1 -2 116.75 29.88
 -19 -1 -2 116.35 29.2
 -19 1 2 121.24 25.98
 -19 -1 2 110.61 25.93
 -19 -1 2 105.46 27.12
 -19 1 -2 88.22 26.02
 19 -1 -2 83.3 24.29
 -19 -1 2 75.47 19.81
 19 1 -2 74.73 23.79
 19 1 -2 100.55 40
 -19 -1 -2 142.98 33.51
 19 1 -2 88.92 28.88
 -19 1 -2 155.13 56
 -19 -1 -2 140.44 32.42
 -19 1 -2 125.6 30.99
 -19 -1 -2 117.3 35.39
 -19 -1 2 98.2 25.31
 19 1 -2 102.9 28.35
 19 1 2 122.64 31.96
 19 -1 2 147.69 33.07
 19 -1 2 64.14 26.8
 -19 1 2 105.62 23.91
 -19 1 -2 124.81 33.84
 19 1 -2 66.86 23.38
 19 -1 -2 74.64 39.24
 19 -1 -2 63.34 25.4
 -19 1 -2 99.9 24.84
 19 1 2 88.34 32.22
 19 1 2 140.42 36.51
 -19 -1 2 94.28 21.96
 -19 -1 -2 152.91 32.35
 19 -1 -2 68.59 27.16
 19 1 2 96.11 29.06
 -19 1 -2 119.16 34.99
 19 1 -2 173.2 51.7
 -19 1 2 116.52 26.84
 19 -1 2 121.47 33.61
 19 1 2 121.85 33.38
 19 1 -2 94.9 26.08
 19 1 2 112.14 52.48
 -19 -1 -2 106.62 29.91
 19 -1 2 145.58 62.11
 -20 1 2 -8.13 8.78
 -20 -1 2 -7.24 12.67
 20 -1 2 4 9.28
 -20 -1 -2 3.59 2.46
 -20 -1 -2 -15.19 12.02
 20 1 2 12.62 12.35
 -20 -1 -2 5.63 9.55
 20 1 2 -9.76 4.4
 -20 1 -2 -37.63 18.68
 20 1 -2 -3.36 8.11
 20 1 -2 2.17 8.68
 20 1 2 14.52 14.07
 20 1 -2 7.27 9.85
 -20 -1 2 2.23 6.24
 20 -1 2 7.79 11.95
 -20 -1 2 7.3 10.13
 -20 -1 2 -1.57 5.47
 -20 1 -2 3.09 6.75
 20 1 -2 6.69 5.11
 20 -1 -2 8.93 7.68
 -20 1 -2 11.19 11.29
 -20 -1 -2 0.13 11.26
 20 1 2 -34.55 21.68
 20 -1 -2 2.24 10.62
 -20 -1 -2 -7.27 10.16
 20 1 -2 -11.82 19.89
 -20 1 -2 1.66 4.81
 20 1 2 10.24 12.73
 -20 -1 -2 1.13 5
 20 -1 2 11.79 7.46
 -20 -1 2 -2.57 4.05
 20 1 -2 -7.46 7.08
 -20 1 2 3.28 4.29
 -20 1 -2 1.01 5.23
 -20 1 -2 -0.09 4.04
 -20 1 2 3.33 6.35
 -20 1 -2 -3.4 10.16
 20 -1 2 13.19 11.7
 -20 1 2 -0.14 3.9
 21 1 -2 48.59 19.19
 -21 1 2 39.42 13.95
 21 1 2 62.07 23.1
 21 1 -2 49.39 22.24
 -21 1 -2 66.87 26.97
 -21 1 -2 45.54 19.33
 21 1 2 50.23 22.42
 21 1 2 38.97 19.83
 -21 1 -2 44.97 16.7
 21 -1 2 57.87 20.87
 -21 -1 2 54.37 19.82
 -21 -1 -2 53.5 20.38
 21 -1 2 28.65 12.01
 21 -1 2 38.26 18.44
 -21 1 2 40.74 15.12
 -21 1 -2 41.83 17.59
 21 1 -2 44.44 16.28
 21 -1 -2 39.27 17.74
 21 1 -2 52.43 27.63
 21 -1 -2 19.34 6.34
 21 1 2 57.71 21.18
 -21 1 2 47.88 19.68
 21 1 -2 26.48 12.36
 -21 -1 -2 42.23 18.93
 21 1 2 26.98 15.62
 -21 1 -2 30.6 16.7
 -21 1 2 40.53 15.11
 -21 1 -2 27.05 17.39
 -21 -1 -2 34.42 9.38
 -21 -1 2 41.99 14.79
 -21 1 -2 24.12 7.78
 21 1 -2 35.69 16.79
 -21 -1 -2 53.85 20.11
 21 -1 2 50.78 23.29
 -21 -1 -2 38.36 16.41
 -21 -1 2 39.43 17.08
 -21 -1 2 46.64 18.18
 -22 1 2 33.31 16.27
 -22 1 -2 54.07 22.46
 -22 -1 -2 57.28 21.07
 22 -1 2 27.35 17.25
 -22 -1 -2 36.95 18.61
 -22 -1 -2 48.36 21.61
 22 1 -2 13.56 9.05
 -22 -1 -2 36.5 17.54
 -22 1 -2 45.73 18.73
 22 1 -2 46.77 20.7
 -22 -1 -2 31.55 15.45
 22 1 2 32.9 17.31
 22 1 -2 27.37 16.55
 -22 -1 2 34.5 15
 -22 1 -2 19.51 13.39
 -22 1 -2 38.72 17.45
 -22 1 2 22.39 7.39
 22 1 2 39.5 20.23
 -22 1 2 31.46 13.9
 22 1 -2 41.82 23
 22 1 -2 25.84 12.84
 22 -1 -2 40.07 20.11
 22 -1 -2 32.54 17.83
 22 1 2 33.69 20.49
 22 1 2 65.94 24
 22 -1 -2 27.32 16.68
 22 1 -2 28.14 17.45
 -22 -1 2 30.26 14.75
 -22 1 -2 45.03 14.61
 22 -1 2 26.12 11.89
 22 -1 2 25.22 11.63
 -22 -1 2 43.31 19.07
 -22 1 2 37.14 16.99
 -22 -1 2 34.22 14.98
 -23 1 2 16.57 8.73
 -23 1 -2 16.35 12.3
 -23 -1 -2 74.66 24.13
 23 -1 -2 1.2 7.73
 23 1 -2 19.08 12.41
 23 -1 2 18.36 13.96
 23 1 2 -4.21 11.53
 23 1 -2 12.11 13.21
 -23 1 2 18.5 13.06
 -23 1 -2 16.95 11.2
 -23 1 -2 12.98 9.29
 23 1 2 5.06 7.14
 23 -1 2 47.59 24.73
 23 -1 -2 14.4 10.3
 23 1 2 -9.63 17.18
 23 1 -2 13.82 11.5
 23 -1 -2 17.97 13.61
 23 1 -2 10.08 5.49
 -23 1 -2 15.31 13.7
 -23 -1 2 10.97 7.75
 -23 -1 -2 19.92 13.53
 -23 -1 -2 16.97 9.89
 23 1 -2 23 13.39
 23 -1 2 15.58 14.86
 -23 -1 2 11.7 7.94
 -23 1 2 16.65 9.88
 -23 -1 2 7.63 9.91
 -23 1 -2 29.57 15.79
 -23 -1 2 20.62 12.82
 -23 -1 -2 4.96 2.05
 23 1 2 8.91 13.21
 -23 1 2 3.46 4.88
 24 -1 2 112.43 32.51
 24 1 -2 111.99 29.83
 24 -1 -2 82.73 27.11
 24 1 -2 163.29 41.22
 24 -1 2 117.62 35.95
 24 1 2 124.09 31.96
 -24 1 2 157.21 34.11
 -24 -1 -2 142.83 33.36
 -24 1 -2 197.92 45.5
 -24 -1 2 110.4 27.65
 -24 1 -2 152.21 36.03
 -24 -1 2 97.22 23.72
 24 -1 -2 61.91 20.96
 24 -1 -2 61.06 21.94
 24 1 -2 78.21 28.17
 24 1 2 104.66 31.63
 -24 -1 -2 138.39 36.29
 -24 -1 -2 179.56 38.65
 24 -1 2 97.95 32.09
 24 1 2 93.45 30.35
 -24 1 2 121.02 30.16
 24 -1 -2 85.61 27.23
 24 1 2 76.54 29.52
 -24 1 2 152.5 33.47
 24 1 -2 88.15 27.11
 -24 1 -2 144.94 34.71
 -24 -1 2 118.27 28.45
 -24 1 -2 143.32 35.19
 -24 -1 -2 149.96 32.62
 -24 1 2 105.25 26.07
 -24 1 -2 129.26 29.03
 -24 -1 2 141.93 32.64
 24 1 -2 68.14 24.06
 -25 1 2 25.56 14.82
 -25 1 -2 17.87 12.52
 -25 -1 -2 1.93 2.76
 25 1 2 3.85 2.99
 25 1 2 -0.31 5.95
 -25 1 -2 29.75 16.91
 25 -1 -2 7.13 10.4
 -25 -1 -2 1.64 4.44
 25 -1 -2 4.93 9.6
 25 1 2 3.42 11.39
 25 -1 2 21.49 18.21
 -25 -1 -2 6.41 3.32
 25 1 -2 -14.85 13.69
 25 1 2 15.33 14.32
 -25 1 -2 8.69 9.58
 -25 1 -2 30.37 16.18
 25 -1 -2 0.56 10.47
 25 1 -2 -8.49 9.62
 25 1 -2 5.9 8.03
 -25 -1 2 13.51 10.59
 25 1 -2 4.92 3.96
 -25 1 2 17.12 9.76
 -25 -1 2 8.05 6.36
 -25 1 -2 3.88 6.35
 -25 -1 -2 23.23 13.68
 25 1 2 13.42 11.01
 25 -1 2 0.48 6.21
 -25 1 2 16.42 10.39
 -25 -1 2 14.86 9.42
 -25 1 2 20.4 12.59
 -25 -1 2 18.04 12.7
 25 -1 -2 -1.97 4.57
 -26 1 -2 66.88 24.1
 -26 -1 2 50.19 16.54
 -26 1 -2 50.38 19.95
 -26 -1 -2 49.18 19.37
 26 -1 2 12.99 13.7
 26 -1 -2 36.17 18
 26 -1 -2 36.66 16.48
 26 1 -2 38.21 15.3
 26 1 2 54.22 23.94
 -26 1 2 49.1 15.67
 -26 -1 -2 60.81 21.65
 -26 -1 2 45.79 15.58
 26 1 2 30.38 18.09
 -26 -1 -2 65.62 23.41
 26 1 2 36.96 19.97
 -26 -1 -2 62.06 21.43
 26 -1 2 35.4 13.03
 26 1 -2 13.8 5.6
 26 -1 -2 21.56 15.66
 -26 1 -2 62.22 19.16
 26 1 2 36.43 11.89
 26 -1 -2 28.24 15.34
 26 -1 2 36.31 12.96
 26 1 -2 27.75 11.98
 -26 1 -2 53.95 20.16
 -26 1 2 32.58 11.64
 -26 1 2 55.52 18.88
 -26 -1 2 60.67 21.96
 -26 1 2 64.23 20.57
 -26 -1 2 61.31 20.28
 -27 1 -2 5.79 8.43
 -27 1 -2 10.09 6.33
 27 -1 -2 5.76 10.46
 -27 1 2 13.08 11.44
 -27 -1 2 4.8 6.11
 27 -1 -2 6.49 7.18
 -27 1 -2 8.16 3.39
 27 -1 -2 1.7 7.65
 27 -1 2 1.27 5.78
 27 1 2 -4.09 10.31
 27 1 2 3.07 7.81
 -27 -1 -2 16.16 10.03
 -27 -1 -2 19.37 12.06
 27 1 -2 7.32 10.87
 -27 1 -2 0.4 1.93
 27 -1 2 10.91 9.01
 27 1 2 10.71 8.6
 27 1 -2 18.55 13.15
 27 -1 -2 6.24 5.66
 27 1 -2 6.15 6.84
 27 1 2 11.98 12.77
 -27 -1 -2 17.55 14.19
 -27 -1 2 3.97 1.91
 -27 1 2 14.61 12.5
 27 -1 2 -0.56 6.02
 -27 -1 2 11.26 7.74
 -27 1 2 23.7 12.35
 -27 -1 -2 6.46 8.2
 27 -1 2 13.54 8.13
 -27 1 2 29.06 15.07
 -27 -1 2 19.83 12.43
 -28 1 2 31.24 11.61
 -28 -1 2 6.23 3.96
 28 1 2 26.57 12.11
 28 1 2 26.42 12.17
 28 1 -2 5.31 10.28
 28 -1 -2 -1.2 9.22
 28 -1 -2 14.75 8.53
 -28 -1 -2 23.95 14.13
 28 -1 -2 30.77 15.9
 28 -1 2 19.66 11.55
 28 1 -2 23.84 11.4
 -28 1 -2 36 16.62
 -28 -1 -2 39.51 15.18
 -28 -1 -2 27.62 14.83
 28 1 2 -0.5 9.78
 -28 1 -2 45.03 16.94
 28 1 -2 7.96 3.49
 -28 1 -2 36.12 14.87
 -28 -1 2 38.54 15.04
 28 1 2 39.76 17.91
 -28 1 -2 53.89 17.85
 -28 1 2 37.43 13.93
 -28 -1 2 33.37 12.07
 -28 1 -2 24.33 10.89
 28 -1 2 6.22 9.42
 28 -1 -2 20.15 13.12
 -28 -1 -2 41.45 17.64
 -28 1 2 47.19 16.82
 -28 1 2 34.75 13.69
 -28 -1 2 47.62 18.16
 28 -1 2 13.26 10.24
 28 -1 2 8.34 7.37
 -29 1 -2 32.29 15.2
 29 1 -2 20.87 10.6
 -29 1 2 29.64 11.64
 -29 -1 2 32.27 12.46
 29 -1 -2 26.25 11.92
 -29 -1 2 17.12 10
 29 1 -2 -3.87 10.93
 -29 1 -2 29.36 12.19
 -29 1 2 27.24 11.8
 29 -1 -2 30.67 15.31
 -29 1 2 44.18 15.69
 29 -1 2 15.92 9.77
 29 -1 2 15.86 9.49
 -29 1 -2 33.88 14.52
 -29 -1 -2 46.96 17.5
 29 1 2 -4.67 10.08
 29 -1 2 14.8 3.4
 -29 -1 -2 38.24 16.04
 29 -1 2 34.81 14.94
 29 1 2 27.01 12.88
 29 1 2 41.6 17.25
 -29 1 2 51.35 16.67
 29 -1 -2 10.52 5.38
 29 1 -2 27.74 12.39
 -29 -1 -2 27.31 13.87
 29 1 2 25.64 12.34
 -29 -1 -2 29.83 12.29
 -29 -1 2 27.95 11.48
 -29 -1 2 32.65 12.73
 -29 1 -2 45 18.71
 -30 1 -2 18.5 10.81
 -30 1 -2 2.41 7.7
 -30 -1 -2 -0.22 7.58
 30 1 -2 1.28 3.1
 30 -1 -2 -13.96 8.73
 -30 -1 -2 6.46 8.29
 -30 -1 -2 -1.77 7.35
 30 1 -2 -5.28 7.49
 30 1 2 8.2 10.7
 30 1 2 4.79 5.52
 -30 -1 -2 8.27 6.93
 30 1 -2 -0.75 6.45
 30 -1 2 2.17 6.71
 -30 -1 2 -13.66 8.18
 30 -1 -2 -16.92 11.88
 -30 1 2 -0.59 7.14
 -30 -1 2 3.48 2.72
 -30 -1 -2 -4.33 6.15
 30 1 2 3.51 3.2
 30 -1 2 13.57 9.56
 -30 1 -2 -5.7 9.58
 -30 1 2 5.37 7.9
 -30 -1 2 2.89 3.14
 30 -1 -2 -2.89 9.16
 -30 1 -2 -3.85 2.02
 30 -1 2 -8.93 8.2
 30 1 2 -14.33 10.52
 30 -1 2 -0.05 7.91
 -30 -1 2 7.32 8.11
 -30 1 2 2.39 5.39
 -31 -1 -2 12.71 9.2
 -31 1 2 17.84 10.01
 31 -1 -2 20.01 10.05
 -31 -1 2 26.11 10.42
 31 -1 2 4.39 5.67
 -31 -1 -2 25.54 8.33
 31 -1 -2 8.7 7
 31 1 -2 -3.2 6.64
 31 1 2 25.8 11.39
 31 -1 2 0.96 6.5
 -31 -1 -2 52.16 15.79
 31 1 2 11.2 6.1
 -31 -1 2 20.09 10.16
 31 1 -2 14.28 8.22
 31 -1 -2 2.04 2.72
 -31 1 2 31.86 12.69
 -31 1 -2 25.29 12.56
 -31 -1 2 28.77 11.92
 31 1 2 11.96 9.07
 -31 1 -2 26.53 11.29
 0 -2 2 81.15 23.23
 0 2 2 99.61 23.15
 0 2 -2 121.91 18.26
 0 -2 -2 69.3 19.36
 0 -2 -2 116.09 22.09
 0 -2 -2 97.45 25.24
 0 2 -2 84.24 19.1
 0 2 2 95.07 24.94
 0 -2 2 113.29 26.39
 0 -2 2 105.31 22.69
 0 2 -2 94.53 22.61
 0 2 -2 96.86 22.13
 -1 2 2 3.36 4.62
 1 2 2 -5 9.27
 1 -2 -2 0.25 5.12
 1 2 2 4.96 7.13
 1 -2 2 1.65 1.8
 -1 -2 2 2.4 2.02
 1 2 -2 5.7 5.35
 1 -2 -2 -6.93 8.25
 -1 2 -2 4.17 5.67
 -1 -2 -2 6.55 8.09
 1 2 -2 0.78 3.5
 1 2 -2 -1.64 2.88
 1 -2 -2 -1.46 3.71
 -1 -2 -2 0.75 4.72
 1 2 -2 3.93 6.55
 -1 2 -2 7.4 9.61
 1 -2 2 0.54 2.41
 1 2 2 -3.44 4.64
 -1 -2 2 -0.9 3.99
 -1 -2 -2 1.39 4.72
 -1 2 -2 1.09 3.63
 -1 2 -2 -3.6 3.86
 -1 2 2 0.74 4.48
 1 2 -2 3.57 8.1
 1 -2 2 -0.19 4.67
 -2 -2 -2 880.79 65.42
 2 -2 2 867.33 74.31
 -2 -2 2 1062.96 73.67
 -2 -2 -2 991.47 77.05
 -2 2 -2 1084.33 54.77
 2 -2 2 902.35 78.29
 -2 -2 -2 941.3 78.89
 2 -2 -2 905.66 70.53
 -2 2 2 1045.3 63.68
 -2 2 2 949.09 75.2
 -2 -2 2 944.38 76.77
 -2 2 -2 1030.2 82.19
 2 2 -2 1099.78 58.28
 2 -2 -2 1124.57 81.86
 2 -2 2 1029.31 65.04
 2 2 2 965.73 78.82
 -2 2 -2 1068.4 86.7
 -2 2 -2 972.67 76.59
 2 2 -2 1016.45 70
 2 2 -2 1007.14 71.4
 2 2 2 962.68 75.62
 -2 2 -2 1120.23 76.34
 2 2 2 1038.73 79.24
 2 2 -2 1014.68 67.51
 3 2 2 144.97 32.21
 -3 2 2 149.87 31.02
 -3 2 -2 177.83 23.79
 -3 -2 -2 131.44 29.71
 3 2 -2 184.41 33.01
 3 -2 -2 135.92 29.03
 -3 2 -2 157.86 34.63
 3 2 -2 179.86 31.53
 3 2 2 193.24 30.05
 -3 -2 -2 151.79 27.16
 -3 2 -2 189.77 32.31
 3 2 -2 183.31 22.56
 -3 -2 2 177.21 32.53
 -3 2 -2 151.66 32.27
 3 -2 2 173.95 24.1
 -3 -2 2 185.05 31.42
 -3 -2 -2 141.59 28.85
 3 -2 2 140.94 30.52
 -3 2 -2 143.85 30.69
 3 2 -2 172.62 29.13
 3 2 2 179.82 32.86
 3 -2 -2 136.41 29.57
 3 2 2 158.38 31.95
 -3 2 2 173.57 24.37
 3 -2 2 146.46 31.85
 -4 2 2 564.19 41.91
 -4 -2 -2 423.99 33.79
 -4 -2 -2 433.09 55.2
 4 2 -2 486.2 55.83
 4 -2 -2 463.52 55.36
 -4 -2 -2 452.21 54.36
 4 2 -2 529.29 53.27
 4 2 -2 625.5 38.74
 -4 2 -2 470.82 58.77
 4 -2 -2 503.71 57.71
 4 -2 2 403.24 53.05
 4 -2 2 472.2 37.92
 -4 2 -2 503.52 42.87
 -4 2 2 443.9 54.5
 -4 2 -2 511.97 65.18
 -4 -2 2 588.28 61.02
 4 2 -2 550.39 51.39
 -4 -2 -2 480.17 50.1
 -4 -2 2 479.78 54.79
 4 2 2 471.83 59.35
 4 -2 2 398.85 53.66
 4 2 2 471.87 53.91
 4 2 2 461.42 59.29
 -4 2 -2 553.79 56.73
 5 2 -2 1141.31 49.91
 -5 2 2 1062.74 65.15
 -5 -2 2 1069.01 82.99
 5 -2 2 887.56 79.86
 -5 2 -2 1102.94 84.98
 -5 2 -2 892.58 63.71
 -5 -2 -2 893.79 81.87
 5 2 -2 1106.58 83.92
 5 -2 -2 797.26 75.67
 -5 2 -2 853.07 81.71
 -5 -2 -2 854.31 40.32
 -5 -2 -2 949.67 72.89
 -5 -2 2 1130.8 84.02
 5 2 -2 1109.64 74.32
 -5 -2 -2 762.04 71.69
 -5 -2 -2 1063.98 61.8
 5 -2 -2 934.85 81.31
 5 2 2 894.81 85.7
 -5 2 -2 964.19 92.54
 -5 2 2 972.17 78.02
 5 -2 2 852.41 81.14
 5 -2 2 909.14 46.77
 5 2 2 897.9 85.55
 -5 2 2 1074.8 54.3
 5 2 2 1019.38 80.73
 6 2 2 27.43 14.4
 -6 2 2 37.88 11.59
 6 2 2 29 13.96
 -6 -2 2 47.09 17.75
 -6 2 2 27.8 12.24
 6 -2 2 32.01 15.39
 -6 -2 2 33.9 15.22
 -6 2 -2 23.12 14.6
 6 -2 -2 31.94 15.34
 -6 -2 -2 41.76 14.16
 -6 -2 -2 41.4 16.7
 -6 -2 -2 39.98 18.1
 6 2 -2 30.56 7.64
 -6 -2 -2 34.1 14.26
 -6 2 2 34.59 14.53
 6 2 2 25.47 13.05
 6 -2 -2 22.25 14.14
 -6 2 -2 51.64 22.4
 6 2 2 34.82 14.36
 -6 2 2 42.04 15.97
 6 2 -2 46.56 15.85
 -6 2 -2 26.8 13.56
 6 2 2 31.67 17.72
 6 2 -2 31.64 13.16
 -6 2 2 38.02 10.39
 6 -2 2 27.6 16.09
 7 2 2 71.51 23.23
 7 2 2 45.56 20.56
 7 -2 2 60.06 21.79
 -7 2 2 75.56 15.32
 -7 2 2 55.44 20.8
 7 -2 -2 63.91 24.55
 -7 -2 2 77.53 23.09
 -7 2 -2 65.75 22.19
 -7 -2 -2 79.44 22.58
 -7 -2 -2 63.67 24.38
 -7 2 -2 34.56 19.72
 -7 -2 -2 67.24 22.41
 7 2 2 74.55 21.08
 7 2 2 71.36 23.76
 -7 2 2 63.72 20.29
 -7 2 -2 68.67 23.41
 -7 -2 2 70.87 22.8
 7 2 -2 66.38 20.16
 7 -2 -2 49.56 20.93
 -7 2 2 58.87 22.42
 -7 2 2 74.07 23.24
 7 -2 2 54.85 20.87
 -7 -2 -2 60.56 19.02
 7 2 -2 83.05 20.93
 -7 2 -2 68.48 21.87
 7 2 2 72.26 26.76
 -8 -2 2 4.93 8.17
 8 2 2 3.35 8.25
 8 -2 2 -1.65 11.98
 -8 2 -2 5.54 4.73
 8 -2 2 7.92 4.37
 -8 2 -2 2.47 6.23
 -8 -2 -2 4.35 5.27
 8 -2 -2 8.97 8.58
 8 -2 -2 4.3 6.1
 -8 -2 -2 -1.7 12.26
 -8 -2 -2 0.23 5.33
 8 2 -2 -0.51 4.2
 8 2 2 15.09 15.18
 8 2 2 -0.31 5.2
 -8 -2 -2 8.69 13.01
 -8 2 2 11.69 12.05
 -8 2 2 -3.34 11.47
 -8 2 2 -0.65 9.91
 -8 2 2 -0.57 4.89
 -8 2 -2 4.54 8.73
 8 -2 -2 4.71 6.01
 8 2 -2 4.12 1.67
 -8 2 -2 11.44 13.35
 -8 -2 2 0.4 2.22
 8 2 2 4.47 8.12
 8 -2 2 12.69 10.37
 8 2 2 6.17 8.52
 -9 2 -2 112.34 35.8
 -9 -2 2 131.74 30.3
 9 -2 2 122.22 32.96
 -9 -2 -2 115.61 31.04
 9 2 2 116.51 31.01
 -9 2 2 142.15 35.28
 9 2 2 83.5 31.49
 9 -2 -2 127.23 43.79
 -9 -2 -2 121.56 32.61
 9 -2 -2 111.21 31.14
 -9 -2 -2 114.67 35.02
 9 2 -2 131.64 31.78
 9 -2 -2 114.26 35.36
 -9 2 -2 97.62 31.06
 -9 -2 -2 106.17 30.43
 -9 2 2 102.67 28.57
 9 2 2 111.4 31.49
 9 2 2 105.28 34.78
 -9 -2 2 111.68 29.96
 -9 2 -2 80.37 25.11
 -9 2 2 165.44 35.4
 -9 2 2 130.82 34.8
 9 -2 2 83.64 30.6
 9 2 2 105.82 26.2
 9 -2 2 117.56 34.07
 9 2 -2 124.29 28.67
 -10 -2 2 974.68 83.25
 -10 -2 -2 705.41 92.38
 10 -2 -2 854.96 98.17
 10 2 -2 1118.87 97.43
 10 -2 2 858.59 96.76
 -10 -2 -2 931.96 95.65
 -10 -2 -2 943.2 91.9
 10 2 2 851.95 87.67
 10 2 -2 1033.27 88.75
 -10 2 2 859.69 94.39
 10 -2 2 980.63 93.84
 -10 2 2 1078.21 93.15
 10 -2 2 719.35 92.43
 10 2 2 834.15 101.13
 -10 -2 2 951.64 90.8
 -10 2 2 969.89 100.45
 10 -2 -2 720.46 94.57
 10 2 2 844.53 106.3
 10 -2 -2 1066.35 109.44
 -10 2 -2 767.14 90.68
 10 2 2 918.14 98.65
 -10 2 -2 681.48 91.47
 -10 2 2 768 83.32
 11 2 2 52.74 16.35
 11 -2 2 34.67 21.29
 11 -2 2 61.16 22.93
 -11 2 2 57.07 22.99
 -11 -2 2 65.86 23.17
 11 -2 -2 38.72 21.37
 11 2 2 77.29 26.99
 11 2 -2 75.49 26.03
 11 -2 -2 57.28 29.75
 -11 -2 -2 68.09 25.47
 -11 2 -2 49.11 24.8
 -11 2 2 35.07 19.26
 -11 2 -2 62.21 27.89
 11 2 2 46.01 26.52
 -11 2 2 54.38 24.56
 -11 -2 -2 51.19 27.18
 11 2 -2 80.03 25.44
 -11 -2 -2 63.65 25.15
 11 -2 2 55.92 29.28
 11 -2 -2 56.73 25.87
 12 2 2 207.45 51.84
 -12 -2 -2 192.37 49.79
 -12 -2 -2 203.69 48.34
 12 2 2 178.79 42.64
 -12 2 2 230.88 48.84
 12 -2 -2 227.44 57.72
 12 2 2 206.33 56.49
 -12 -2 -2 233.59 50.43
 12 -2 2 244.87 49.26
 -12 2 -2 201.58 50.61
 12 -2 -2 285.85 62.66
 -12 -2 2 264 49.85
 -12 2 -2 214.38 54.33
 -12 2 2 245.41 55.02
 12 2 -2 313.52 55.49
 12 -2 -2 226.25 53.67
 -12 2 2 208.82 48.01
 12 -2 2 219.41 53.19
 12 -2 2 241.67 54.62
 -13 -2 -2 276.35 61.81
 13 2 -2 378.32 63.18
 13 -2 -2 256.99 64.3
 -13 2 -2 200.07 53.03
 -13 -2 -2 254.91 57.47
 -13 2 2 239.76 54.03
 -13 2 -2 270.93 61.01
 -13 -2 -2 367.03 64.42
 13 -2 2 316.63 64.96
 13 -2 -2 270.32 65.36
 -13 -2 2 363.67 62.82
 -13 2 2 315.97 63.92
 13 -2 -2 338.41 72.9
 13 2 2 286.39 65.46
 13 -2 2 262.22 62.48
 13 2 2 311.79 59.76
 14 -2 -2 131.87 43.88
 14 -2 2 133.86 49.69
 14 2 2 122.07 39.67
 14 2 -2 152.92 42.48
 -14 2 -2 116.64 43.31
 -14 -2 -2 104.49 38.14
 14 -2 2 42.35 26.58
 -14 2 -2 97.46 38.83
 14 -2 -2 117.73 48.5
 -14 -2 -2 125.18 42.76
 -14 -2 2 150.73 42.37
 14 -2 2 149.87 45.31
 -14 2 2 122.42 42.13
 14 -2 -2 139.55 51.58
 14 2 2 121.62 44.27
 15 -2 2 126.41 49.95
 15 2 -2 126.83 39.81
 -15 -2 -2 83.05 32.96
 15 2 2 112.16 40.95
 15 -2 -2 91.88 40.85
 -15 2 -2 99.68 40.27
 15 -2 2 98.11 40.37
 -15 -2 -2 107.34 41.44
 -15 2 -2 110.48 43.02
 -15 -2 2 114.15 37.71
 15 -2 -2 104.09 45.67
 15 -2 -2 70.72 32.42
 15 -2 2 69.95 35.75
 -15 -2 2 142.51 46.97
 -15 2 2 92.21 38.22
 15 2 2 83.58 40.92
 -16 2 -2 504.45 94.43
 16 -2 -2 534.72 111.08
 16 2 -2 683.14 95.2
 16 -2 2 413.91 90.17
 -16 -2 -2 789.41 107.54
 16 -2 2 665.02 109.36
 -16 -2 2 907.42 124.72
 -16 2 2 577.37 91.81
 -16 -2 2 698.88 97.29
 -16 2 -2 613.09 102.29
 16 -2 -2 607.6 116.12
 16 2 2 557.02 103.9
 16 -2 2 603.08 109.41
 16 -2 -2 602.03 105.13
 17 2 2 2.79 10.77
 17 2 2 21.54 14.53
 -17 2 2 13.75 8.74
 -17 2 -2 21.18 17.33
 -17 2 2 7.35 8.95
 -17 -2 -2 12.37 9.61
 17 2 2 0.33 30.14
 -17 2 -2 -34.24 25.25
 17 2 -2 4.58 10.7
 -17 2 -2 10.58 12.52
 -17 -2 2 29.94 23.91
 -17 -2 -2 -1.13 6.42
 17 2 2 10.1 21.28
 -17 2 2 3.75 8.34
 17 -2 -2 6.52 17.63
 -17 2 -2 1.02 4.14
 -17 -2 -2 6.45 3.9
 -17 2 -2 3.2 4.22
 -17 -2 2 13.16 8.89
 17 2 -2 15.86 11.29
 17 -2 -2 7.7 10.51
 -17 -2 -2 16.36 13.04
 17 2 -2 5.77 6.04
 17 -2 2 10.43 15.92
 17 -2 2 31.1 19.04
 17 2 2 7.24 5.03
 -17 -2 2 -2.67 19.96
 17 -2 -2 41.88 34.43
 -17 2 -2 21.81 15.49
 -17 2 2 11.82 6.36
 -17 2 2 20.31 11.28
 -17 2 -2 6.37 5.85
 17 2 2 11.84 9.72
 -17 -2 2 10.9 9.28
 17 2 -2 2.51 7
 18 2 2 13.09 11.88
 -18 -2 -2 -2.38 4.38
 -18 -2 -2 -6.99 10.09
 18 2 2 0.34 7.24
 18 2 -2 -44.24 25.53
 -18 -2 -2 20.46 7.07
 -18 -2 2 -30.53 24.16
 -18 2 -2 11.98 11.68
 -18 -2 -2 12.08 11.36
 18 2 -2 16.86 11.88
 18 2 -2 7.93 10.47
 -18 2 -2 8.01 6.89
 18 2 -2 10.03 9.91
 18 -2 -2 15.5 12.34
 18 2 2 -4.62 10.88
 18 -2 -2 8.82 5.51
 -18 -2 -2 4.34 2.83
 -18 2 2 2.75 7.61
 -18 2 -2 -2.4 11.03
 18 -2 2 1.27 6.28
 18 -2 2 -9.66 17.52
 -18 2 -2 -7.07 10.99
 18 -2 -2 -1.47 6.24
 18 2 -2 16.12 11.09
 18 2 2 -1.09 4.31
 -18 2 -2 -50.31 31.56
 -18 2 2 -6.97 7.88
 18 2 -2 5.07 6.51
 18 2 2 4.97 17.07
 -18 2 -2 -0.35 8.08
 -18 -2 -2 8.06 8.64
 -18 2 -2 -5.08 9.39
 -18 2 2 10.74 8
 18 -2 2 -7.14 20.54
 -18 -2 2 -2.24 6.58
 -18 -2 2 9.56 2.4
 18 2 -2 -2.52 14.61
 -18 -2 2 5.16 4.69
 -18 2 2 19.68 18.93
 18 -2 -2 -62.98 36.59
 -18 -2 2 -4.49 5.43
 -18 -2 2 8.5 8.79
 18 2 2 -10.02 14.8
 -18 2 2 -1.8 7.98
 -19 -2 2 18.99 9.99
 -19 2 -2 24.25 15.04
 -19 2 2 34.6 13.17
 19 2 2 -5.38 11.62
 -19 -2 2 27.75 13.05
 19 2 -2 32.48 16.67
 -19 2 -2 48.13 19.15
 -19 -2 -2 21.65 9.82
 -19 -2 -2 30.31 15.24
 -19 2 2 20.85 10.11
 -19 2 2 27.82 13.44
 -19 -2 -2 36.92 19.54
 19 2 2 13.18 9.43
 19 2 -2 33.3 17.14
 19 -2 2 39.14 14.37
 19 2 -2 27.35 14.49
 -19 -2 2 14.49 11.08
 19 2 2 34.93 14.58
 -19 -2 -2 18.76 8.42
 19 -2 -2 -2.95 10.44
 -19 2 -2 45.73 17.67
 19 -2 -2 63.41 37.56
 19 2 -2 83.23 33.03
 -19 -2 -2 37.18 16.85
 19 -2 -2 7.87 5.33
 -19 2 -2 23.3 11.74
 19 2 -2 26.35 10.9
 -19 -2 2 25.19 11.16
 19 2 2 12.76 7.74
 19 2 2 38.74 19.87
 -19 2 -2 39.12 19.98
 -19 -2 -2 40.08 20.29
 -19 2 2 22.52 10.5
 19 2 -2 51.14 21.98
 19 2 2 22.45 9.05
 -19 -2 2 21.06 11.17
 -20 -2 2 89.77 22.41
 20 2 2 110.32 30.62
 -20 2 2 110.46 25.81
 -20 -2 2 121.28 28.74
 -20 2 -2 98.29 24.79
 -20 -2 2 86.63 22.65
 -20 -2 -2 72.73 24.85
 20 2 -2 81.33 27.46
 20 2 2 84.91 24.73
 -20 2 -2 107.06 33
 -20 -2 -2 111.45 29.03
 20 2 2 61.74 26.02
 -20 -2 -2 122.11 30.35
 20 2 2 103.42 31.19
 20 2 -2 84 27.93
 20 2 -2 91.42 26.29
 20 -2 -2 67.16 23.21
 20 -2 2 69.65 24.99
 -20 2 -2 99.82 27.25
 20 -2 -2 70.33 26.77
 -20 -2 2 101.05 25.61
 20 2 -2 104.17 27.09
 -20 2 -2 84.59 26.82
 20 2 -2 146.54 42.52
 -20 -2 -2 96.96 27.24
 -20 2 -2 80.21 35.06
 -20 2 2 99.95 25.19
 20 2 -2 92.76 32.47
 20 2 2 110.81 33.49
 -20 2 -2 83.35 25.08
 -20 -2 2 97.29 25
 -20 2 2 95.76 24.92
 -20 2 2 96.57 25.79
 21 -2 2 69.62 25.04
 -21 2 -2 64.25 20.44
 -21 -2 2 62.93 19.86
 21 2 -2 63.99 22.11
 -21 -2 -2 48.82 20.55
 21 -2 2 64.13 25.66
 -21 2 -2 80.33 26.91
 -21 -2 -2 88.82 25.96
 -21 2 -2 65.09 24.82
 21 2 2 51.22 21.65
 21 -2 -2 23.49 12.82
 -21 -2 2 66.89 21.87
 -21 -2 -2 61 23.01
 21 2 -2 48.86 17.77
 -21 2 -2 61.58 25.63
 -21 -2 -2 82.94 26.18
 21 2 2 57.43 23.6
 21 -2 -2 43.29 17.51
 -21 -2 2 55.49 19.24
 21 2 -2 31.74 18.27
 21 2 2 46.14 24.24
 21 2 -2 86.86 33.16
 -21 2 -2 54.59 22.33
 -21 2 2 89.45 23.72
 -21 -2 2 95.51 25.02
 21 2 -2 33.01 16.93
 21 2 2 67.1 24.83
 21 2 -2 71.67 27.43
 21 2 2 30.72 15.84
 -21 -2 2 82.91 26.25
 -21 2 2 62.82 22.1
 -21 2 2 76.04 22.18
 -21 2 2 78.16 23.97
 -22 -2 2 122.34 30.96
 -22 -2 -2 91.4 27.11
 22 2 2 103.93 31.13
 -22 -2 -2 107.73 28.43
 22 -2 -2 62.43 21.32
 -22 2 -2 93.91 29.04
 -22 -2 2 101.16 26.83
 22 2 -2 85.86 25.34
 22 -2 2 76.1 26.88
 22 2 2 74.04 27.49
 22 2 -2 67.76 22.4
 -22 2 2 109.9 26.53
 -22 -2 2 103.96 27.43
 22 2 -2 156.96 48.12
 22 2 2 91.08 28.15
 -22 2 -2 130.74 31.93
 -22 2 -2 112.28 31.06
 -22 2 -2 129.12 33.42
 22 -2 -2 43.14 21.21
 -22 2 2 90.98 26.11
 -22 -2 -2 109.75 28.06
 -22 -2 -2 108.14 30.23
 22 2 -2 95.17 28.13
 -22 2 -2 101.77 31.54
 22 2 2 79.13 31.33
 -22 -2 2 105.69 23.66
 22 2 -2 91.07 30.34
 22 2 -2 101.98 29.19
 22 2 2 75.27 29.97
 22 -2 2 36.89 16.61
 -22 -2 2 76.21 23.87
 -22 2 2 100.35 26.59
 -22 2 2 120.41 29.3
 -23 2 -2 28 18.96
 23 -2 -2 32.78 13.26
 -23 -2 2 34.22 15.83
 -23 -2 -2 42.06 17.16
 23 2 -2 16.83 9.56
 23 2 -2 40.65 22.03
 23 -2 2 31.4 15.75
 -23 -2 -2 38.72 16.81
 -23 2 -2 31.59 13.23
 23 -2 2 20.32 14.45
 23 2 2 36.01 14.89
 23 2 2 44.68 20.19
 23 -2 -2 23.78 13.28
 -23 2 2 36.22 14.98
 -23 -2 -2 41.83 20.01
 23 2 2 55.8 22.53
 -23 2 -2 35.18 16.51
 23 2 2 17.55 15.74
 23 2 -2 23.5 12.61
 23 2 -2 25.48 16.81
 23 2 2 20.28 10.51
 -23 2 -2 39.69 16.52
 -23 2 2 53.2 20.33
 -23 -2 -2 37.6 16.22
 23 2 -2 34.32 15.41
 -23 2 2 32.17 12.27
 -23 -2 2 25.79 9.92
 23 2 -2 11.36 7.23
 23 2 2 24.16 16.57
 -23 -2 2 40.9 17.32
 -23 2 2 60.22 22.79
 -23 -2 2 33.99 15.39
 -24 2 -2 222.76 48.03
 24 -2 -2 108.13 33.87
 24 -2 2 148.58 38.02
 -24 -2 2 206.79 35.58
 24 2 2 255.55 45.83
 -24 -2 -2 209.4 40.66
 24 2 2 114.61 38.17
 -24 -2 2 165.23 33.8
 -24 -2 -2 259.23 46.34
 24 2 -2 185.43 37.66
 -24 2 2 192.6 36.69
 24 2 2 204.13 45.25
 24 2 -2 125.82 27.91
 24 -2 -2 130.03 34.94
 -24 2 2 198.22 35.86
 -24 -2 -2 250.67 46.58
 -24 -2 2 178.07 35.85
 -24 2 -2 209.92 43.72
 -24 2 2 206.4 38.46
 24 2 -2 142.88 34.29
 24 -2 -2 162.94 40.92
 24 2 -2 184.41 38.76
 24 2 -2 282.67 55.49
 -24 -2 2 239.35 42.92
 24 2 2 176.58 40.65
 -24 2 -2 213.63 42.11
 -24 -2 -2 220.82 40.29
 24 2 -2 204.31 42.88
 24 -2 2 176.18 40.48
 -24 2 2 220.68 40.92
 24 2 2 174.33 43.8
 -24 2 -2 225.78 39.68
 24 2 2 218.03 43.54
 25 -2 -2 2.22 9.32
 -25 2 2 2.3 6.29
 -25 -2 -2 -1.11 5.59
 -25 2 -2 -4.88 8.07
 25 -2 -2 -6.19 6.68
 25 -2 -2 -21.36 14
 25 2 2 -12.17 21.55
 -25 -2 2 9.63 9.16
 25 -2 2 3.26 3.78
 25 2 2 -2.14 10.65
 -25 -2 -2 -2.66 12.39
 -25 -2 -2 -5.72 8.68
 25 2 -2 2.01 5.68
 -25 2 2 -4.09 7.52
 25 2 -2 8.43 10.36
 25 2 -2 -4.79 2.35
 25 -2 -2 -1.99 8.98
 -25 2 2 -11.97 12.13
 25 2 2 7.59 11.72
 -25 2 -2 -3.51 5.4
 25 2 -2 -0.82 7.03
 25 2 2 -11.44 17.59
 25 -2 2 5.05 7.49
 25 2 -2 -9.02 16.28
 -25 2 -2 -0.58 9.91
 -25 2 2 2.46 3.8
 -25 -2 2 1.92 5.47
 25 2 2 6.67 3.41
 -25 -2 -2 4.7 8.44
 -25 2 -2 0.27 8.07
 25 2 -2 -1.48 7.18
 -25 -2 2 1.15 4.82
 -25 -2 2 1.12 3.92
 -26 2 2 147.43 31.2
 -26 2 2 111.12 27.82
 -26 2 -2 120.31 29.91
 -26 -2 -2 116.99 29.47
 26 2 2 58.44 21.94
 26 -2 -2 71.21 23.91
 -26 2 -2 120.16 29.96
 -26 -2 -2 108.28 31.06
 26 -2 -2 44.55 18.62
 -26 -2 2 104.24 22.7
 26 -2 -2 42.48 16.74
 26 2 -2 64.49 21.01
 26 -2 2 79.11 25.62
 -26 2 2 89.72 23.65
 -26 -2 -2 143.55 31.64
 -26 2 -2 117.67 30.29
 26 2 2 115.01 29.22
 26 2 2 62.77 23.46
 26 -2 2 36.02 14.52
 26 -2 -2 51.38 20.24
 -26 2 -2 118.07 29.48
 26 2 -2 86.04 25.15
 26 2 2 94.67 28.2
 26 2 -2 52.06 19.41
 -26 -2 -2 114.05 26.46
 26 2 -2 82.49 33.58
 26 2 2 70.98 23.38
 -26 2 2 121.59 30.04
 -26 -2 2 106.5 27.55
 26 2 -2 72.08 22.14
 -26 -2 2 107.03 26.52
 -26 -2 2 92.55 25.36
 -27 2 2 10.1 10.83
 -27 -2 2 15.28 9.99
 -27 2 -2 20.64 10.34
 -27 -2 2 7.26 6.33
 27 -2 2 10.36 12.24
 -27 2 2 20.18 7.14
 27 2 -2 5.19 8.05
 -27 -2 -2 28.17 14.82
 27 -2 2 16.37 14.98
 27 2 2 -6.08 5.43
 27 -2 2 -4.5 9.18
 -27 2 -2 6.15 5.24
 -27 -2 -2 19.19 12.22
 27 2 -2 12.6 10.96
 27 -2 -2 8.77 11.16
 -27 -2 -2 8.75 9.48
 -27 2 2 27.61 13.31
 -27 -2 -2 16.73 12.64
 27 2 -2 16.57 12.72
 27 -2 -2 1.64 7.79
 27 2 2 7.08 6.04
 27 2 2 15.21 12.4
 27 -2 -2 8.28 7.59
 27 -2 -2 -1.06 12.63
 27 -2 2 15.4 10.17
 -27 2 2 6.65 6.02
 27 2 -2 18.44 8.03
 -27 2 -2 26.94 14.18
 27 2 2 5.34 7.66
 -27 2 -2 12.06 11.18
 -27 -2 2 0.26 8.65
 -27 -2 2 16.09 4.28
 28 2 -2 19.34 10.61
 -28 -2 2 52.42 15.27
 -28 -2 -2 62.69 21.15
 28 2 2 26.8 14.15
 28 2 -2 6.2 6.54
 28 -2 2 20.35 11.2
 -28 2 2 44.28 16.5
 28 -2 2 17.31 7.58
 28 -2 -2 22.85 11.05
 28 2 -2 24.97 12.46
 28 -2 -2 6.59 3.71
 -28 -2 -2 62.04 18.82
 -28 2 -2 50.81 16.37
 -28 2 -2 45.27 18.99
 -28 -2 2 32.69 11.78
 -28 2 2 49.09 16.45
 28 -2 -2 17.77 10.94
 28 -2 2 24.04 15.26
 28 2 2 24.72 13.87
 -28 2 2 45.91 16
 -28 -2 2 37.44 13.77
 -28 2 -2 38.68 17.47
 28 2 2 28.4 16.57
 28 -2 -2 16.6 9.06
 28 -2 2 41.66 18.27
 -28 -2 -2 39.1 16.95
 28 2 2 26.18 9.96
 -28 -2 -2 61.21 20.99
 28 2 -2 8.06 2.25
 -28 2 2 59.91 18.34
 -28 -2 2 52.07 17.28
 -29 2 2 7.65 4.04
 -29 -2 2 19.21 7.55
 -29 -2 2 11.21 7.34
 -29 -2 -2 14.28 9.37
 29 2 2 20.8 5.98
 29 -2 -2 -2.01 7.85
 29 2 -2 7.3 5.12
 -29 -2 -2 16.77 10.52
 -29 2 2 18.93 10.68
 29 -2 -2 11.31 11.7
 -29 -2 -2 19.46 14.15
 29 -2 2 23.23 12.19
 29 2 2 13.72 9.82
 -29 -2 -2 3.06 7.25
 -29 2 -2 8.15 3.71
 -29 2 2 5.48 5.35
 29 2 -2 5.82 2.46
 29 2 2 15.96 9.88
 29 -2 -2 7.55 6.88
 29 -2 -2 6.99 8.55
 29 -2 2 2.05 9.27
 29 -2 2 6.6 4.48
 -29 -2 2 10.53 7.35
 -29 2 -2 19.34 11.95
 29 -2 2 2.95 6.21
 -29 2 -2 -0.13 9.64
 29 2 2 -5.08 9.26
 -29 -2 2 4.06 5.2
 -29 2 2 23.53 11.37
 -30 2 2 3.29 5.79
 -30 -2 2 7.96 7.43
 30 -2 -2 0.57 3.95
 30 -2 -2 8.85 5.56
 30 2 2 20.7 10.63
 -30 2 -2 8.17 4.63
 30 2 2 10.88 7.04
 -30 -2 2 11.53 5.89
 30 -2 2 0.72 6.41
 30 -2 -2 10.73 6.62
 -30 2 2 6.52 5.7
 -30 -2 -2 8.54 9.62
 30 -2 -2 -4.46 3.9
 30 -2 2 -0.73 10.96
 -30 -2 2 5.82 5.01
 -30 -2 -2 10.24 10.74
 -30 2 -2 18.56 11.15
 30 -2 2 -2.23 4.36
 -30 -2 -2 6.23 3.32
 -30 2 2 7.49 5.24
 -30 -2 2 2.83 5.94
 30 2 -2 -10.37 8.21
 30 2 2 -4.5 10.42
 30 -2 2 0.31 2.32
 -30 -2 -2 -1.33 6.72
 30 2 -2 4.32 4.6
 30 2 2 -2.05 3.77
 -31 -2 -2 13.33 7.31
 31 -2 -2 0.99 4.45
 -31 2 -2 11.81 6.93
 31 -2 -2 9.9 6.9
 31 2 2 2.39 4.27
 -31 -2 -2 9.9 7.16
 31 -2 2 7.74 4.4
 31 -2 2 5.49 4.4
 31 2 -2 7.06 5.39
 31 2 -2 7.76 5.61
 -31 2 -2 31.15 12.13
 31 2 2 0.85 4.04
 -31 2 2 10.42 6.88
 -31 -2 2 0.71 3.83
 0 3 2 2449.9 128.44
 0 3 -2 2292.42 49.49
 0 -3 -2 1957.75 119.72
 0 -3 -2 2589.7 104.9
 0 3 2 2274.03 125.41
 0 3 -2 2499.12 120.95
 0 3 -2 2587.14 135.73
 0 3 -2 2611.59 71.86
 0 -3 2 2150.76 129.21
 0 -3 -2 2092.77 121.21
 0 -3 2 2886.54 125.68
 0 3 2 2277.47 130.18
 0 3 2 1836.72 51.16
 0 3 -2 2329.04 125.89
 1 3 2 505.14 60.57
 1 -3 2 456.56 58.2
 -1 3 -2 292.92 15.14
 -1 3 -2 328.23 19.92
 -1 -3 -2 482.52 59.67
 -1 3 -2 572.94 66.95
 -1 -3 -2 573.34 45.59
 1 -3 -2 400.98 53.66
 -1 -3 2 601.89 59.61
 -1 -3 -2 508.57 55.86
 1 3 2 471.37 56.07
 -1 3 2 405.51 53.51
 1 3 -2 507.73 29.79
 -1 3 -2 491.21 56
 -1 -3 2 270.27 15.26
 1 3 -2 546.48 59.75
 -1 3 2 479.05 59.12
 -1 -3 2 447.46 58.3
 1 -3 -2 501.65 49.54
 -1 3 2 488.74 27.88
 1 -3 2 417.11 46.74
 1 -3 -2 396.98 52.86
 1 3 2 510.85 33.04
 1 -3 2 412.7 56.21
 1 3 -2 487.8 57.04
 -1 3 -2 483.63 58.92
 1 3 2 420.33 30
 -1 3 2 519.38 57.73
 -1 -3 -2 447.91 54.7
 1 3 -2 544.36 56.27
 1 3 2 526.08 55.9
 1 3 2 509.07 59.49
 -2 3 2 2595.21 125.74
 -2 -3 2 2407.07 137.17
 -2 -3 2 2446.63 125.18
 -2 -3 2 2343.39 65.03
 -2 3 -2 2503.26 126.66
 -2 3 -2 1477.3 41.93
 2 3 2 2383.87 125.51
 -2 -3 -2 2140.16 127.96
 2 -3 -2 2387.66 116.85
 2 -3 2 2125.18 126.17
 2 3 2 2198.45 122.06
 -2 -3 -2 2272.49 119.36
 -2 3 -2 2417.76 144.4
 -2 3 2 2410.73 100.54
 2 -3 -2 1888.18 119.55
 2 -3 -2 2200.95 125.01
 2 -3 2 2318.57 103.24
 -2 3 2 2476.77 77.91
 2 3 2 2245.18 126.45
 -2 3 2 2038 121.99
 -2 3 -2 2270.12 132.11
 2 3 -2 2273.31 120.78
 -2 3 -2 2503.84 143.21
 2 3 -2 2437.58 119.9
 2 3 2 2300.69 77.95
 2 -3 2 2024.93 121.35
 -2 -3 -2 2243.61 123.94
 2 3 2 2308.73 132.3
 -3 3 2 182.9 32.02
 3 -3 2 146.83 33.28
 3 3 2 121.62 29.17
 3 3 2 168.8 23.61
 3 3 2 150.45 33.02
 -3 -3 -2 147.94 33.51
 -3 -3 -2 142.03 32.43
 3 -3 -2 120.71 28.58
 -3 -3 2 154.53 32.34
 3 -3 2 140.24 23.3
 -3 3 -2 159.21 32.28
 -3 -3 2 188.48 22.15
 3 3 2 159.85 34.01
 -3 3 -2 146.33 35.43
 -3 -3 2 157.04 35.45
 3 -3 2 123.16 30.27
 -3 -3 -2 146.31 29.96
 -3 3 2 174.74 24.25
 -3 3 2 136.32 31.29
 -3 3 -2 149.52 33.44
 -3 3 -2 136.98 35.36
 3 3 -2 148.85 31.44
 -3 3 2 167.91 23.3
 3 3 -2 150 30.29
 3 -3 -2 154.79 33.79
 3 3 2 152.74 34.98
 4 3 -2 1255.66 86.01
 4 3 2 1127.83 99.31
 4 -3 2 936.73 84.57
 -4 -3 2 1284.98 103.18
 -4 -3 -2 994.89 91.44
 4 -3 -2 1189.04 97.42
 4 -3 -2 1134.45 94.58
 4 3 2 1240.85 92.87
 4 -3 2 1012.82 87.79
 -4 -3 -2 1014.1 83.32
 -4 -3 -2 1062.66 86.11
 -4 -3 2 1199.16 90.63
 4 3 2 1058.02 91.45
 -4 3 -2 1060.28 87.88
 -4 3 2 1266.53 71.9
 -4 3 2 1052.4 89.27
 4 -3 2 1149.24 64.1
 -4 3 -2 1098.4 101.81
 -4 -3 2 1476.13 70.01
 4 3 2 991.57 84.65
 -4 3 -2 1049.83 94.57
 4 3 -2 1177.42 85.7
 -4 3 2 1190.31 56.21
 4 3 2 1175.2 69.3
 -4 3 -2 1043.51 97.17
 5 -3 -2 57.47 21.28
 5 -3 2 54.51 20.14
 5 3 2 60.02 24.88
 5 -3 2 42.53 18.7
 5 3 -2 72.93 22.33
 -5 -3 2 68.66 21.92
 5 3 -2 74.44 21.87
 -5 -3 -2 77.63 24.33
 -5 3 2 72.36 19.34
 -5 3 -2 57.64 21.41
 -5 -3 2 101.93 20.2
 -5 -3 -2 62.42 24.05
 -5 -3 -2 68.7 22.66
 5 -3 -2 51 21.39
 -5 3 -2 74.11 23.68
 -5 3 -2 63 22.75
 5 3 2 81.51 24.16
 -5 3 2 64.7 22.09
 -5 3 2 53.18 21.89
 5 3 2 63.24 22.31
 5 3 2 58.18 22.19
 5 3 -2 66.34 21.12
 -5 -3 2 88.2 27.99
 5 -3 2 55.69 12.55
 6 3 2 77.03 20.61
 -6 3 -2 59.44 22.36
 6 -3 2 47.84 19.66
 -6 -3 2 66.32 25.54
 6 3 2 43.69 18.58
 -6 3 2 83.56 25.16
 6 -3 -2 43.59 20.23
 -6 3 -2 54.92 23.83
 -6 -3 -2 47.03 22.4
 -6 -3 2 96.51 21.28
 -6 3 -2 63.4 25.22
 -6 3 2 83.07 22.66
 -6 -3 2 66.66 22.59
 6 3 2 51.57 21.41
 -6 -3 -2 53.97 20.9
 -6 3 2 43.37 19.94
 -6 -3 -2 41.13 17.23
 6 -3 -2 55.49 21.86
 6 3 2 51.5 24.46
 6 3 -2 80.48 22.93
 6 3 -2 65.86 21.47
 6 3 -2 79.28 23.31
 6 3 2 73.68 22.11
 6 -3 2 67.87 24.35
 7 -3 2 229.91 42.96
 -7 -3 2 300.32 51.93
 -7 3 -2 190.25 45.4
 7 3 -2 316.19 47.99
 7 -3 -2 221.94 52.53
 -7 3 2 270.78 47.47
 -7 -3 2 348.8 42.65
 7 -3 2 215.73 43.92
 -7 3 -2 208.84 48.18
 -7 3 2 256.21 40.08
 -7 -3 2 256.39 46.46
 7 3 2 260.14 43.69
 -7 -3 -2 149.83 39.93
 -7 3 -2 251.96 50.46
 7 3 -2 260.56 42.89
 -7 -3 -2 234.99 42.74
 7 -3 -2 211.46 47.15
 7 3 2 216.96 48.44
 -7 -3 -2 238.83 42.77
 -7 3 2 256.05 49.5
 7 3 -2 292.34 43.87
 7 3 2 212.28 42.16
 7 3 2 264.62 41.25
 -8 -3 -2 223.09 43.32
 8 -3 2 190.18 38.79
 -8 -3 2 336.93 56.25
 8 -3 -2 185.03 51.56
 8 -3 2 145.71 38.51
 8 3 -2 243.69 43.02
 8 3 2 209.02 39.92
 -8 -3 2 295.22 42.34
 -8 3 -2 163.51 39.47
 -8 -3 -2 189.57 45.04
 -8 3 2 240.1 44.73
 8 3 2 180.27 38.94
 -8 3 2 254.52 43.76
 -8 3 -2 217.72 47.9
 -8 -3 -2 224.22 43.6
 -8 3 -2 169.64 45.63
 -8 -3 2 241.91 45.36
 8 3 2 236.84 52.75
 8 3 -2 227.27 41.47
 -8 3 2 241.56 51.16
 8 3 -2 272.36 43.61
 8 -3 -2 206.76 40.07
 8 3 2 238.44 42.29
 8 -3 2 194.21 43.16
 8 -3 -2 231.68 50.74
 9 3 2 -0.49 9.45
 -9 3 -2 16.57 16.6
 9 -3 2 -1.63 5.08
 9 3 -2 -0.65 6.78
 9 -3 2 1.51 6
 9 3 2 -15.95 11.21
 -9 3 -2 2.24 2.82
 -9 -3 -2 0.57 5.23
 -9 -3 2 4.49 3.33
 9 3 2 5.36 12.54
 -9 -3 2 6.99 10.47
 9 -3 2 2.6 8.65
 9 3 -2 3.06 5.17
 -9 3 -2 -4.54 14.88
 -9 -3 -2 -0.02 9.21
 -9 3 2 -7.15 11.15
 -9 -3 -2 7.74 14.01
 -9 -3 2 3.41 8.08
 -9 3 2 0.09 7.28
 9 -3 -2 -8.5 18.78
 9 -3 -2 3.86 12.04
 -9 3 2 6.71 7.48
 9 3 -2 6.6 9.14
 9 3 2 0.14 3.02
 9 -3 -2 -1.27 5.65
 10 -3 2 326.36 54.55
 10 3 -2 387.65 57.22
 -10 -3 -2 285.8 61.37
 -10 3 -2 243.25 55.61
 10 -3 -2 254.79 60.17
 -10 -3 2 383.45 60.12
 -10 -3 -2 260.58 50.67
 10 3 2 306.42 55.04
 10 -3 -2 261.79 50.53
 -10 3 2 350.62 59.9
 -10 3 2 327.86 64.98
 -10 3 -2 263.04 58.76
 -10 -3 2 441.21 58.08
 10 -3 -2 278.26 59.45
 10 3 -2 365.96 52.67
 -10 -3 2 371.53 58.95
 10 3 -2 353.7 55
 -10 3 2 264.56 49.55
 -10 -3 -2 335.2 56.1
 10 -3 2 276.1 53.37
 10 -3 2 249.18 53.96
 10 3 2 252.23 50.03
 -11 3 2 35.61 16.5
 11 -3 2 53.17 24.85
 11 -3 2 43.45 26.89
 11 -3 -2 44.25 22.4
 11 -3 2 51.84 22.62
 11 3 2 32.57 18.71
 -11 3 -2 42.12 24.7
 11 -3 -2 60.74 25.84
 -11 3 2 46.16 20.78
 11 3 -2 63.67 22.91
 -11 -3 -2 35.37 23.03
 11 -3 -2 40.79 24.11
 -11 -3 2 53.81 23.31
 -11 -3 -2 48.23 25.81
 -11 3 -2 31.08 19.9
 -11 -3 2 51.67 24.48
 -11 3 2 29.08 17.29
 -11 -3 2 81.46 29.58
 11 3 -2 58.8 21.5
 11 3 -2 63.57 21.97
 11 3 2 52.11 19.03
 -12 -3 -2 1593.97 153.68
 -12 -3 2 2278.26 153.23
 -12 3 2 1983.31 162.53
 12 3 -2 2525.86 155.71
 12 3 -2 2303.21 149.99
 12 -3 -2 1618.53 167
 12 -3 2 1776.65 148.02
 -12 -3 2 2287.12 146.66
 12 3 2 1856.07 152.28
 -12 3 2 1566.39 132.79
 -12 3 -2 1684.24 152.89
 12 3 2 1840.94 149.04
 12 -3 -2 2088.03 182.9
 -12 3 -2 1408.18 142.3
 12 3 -2 2326.87 139.52
 12 -3 -2 1797.25 162.59
 12 -3 2 1571.48 150.69
 -12 -3 -2 1914.08 147.95
 13 -3 2 134.76 45.02
 13 3 -2 246.28 50.3
 -13 -3 -2 178.4 52.19
 13 3 2 185.77 48.8
 -13 3 -2 135.86 46.38
 -13 -3 2 253.45 50.4
 13 3 2 197.93 51.41
 -13 -3 -2 154.53 44.84
 13 -3 -2 225.98 64.1
 -13 -3 2 246.31 51.85
 -13 3 -2 88.48 35.92
 13 3 -2 231.38 45.7
 13 -3 -2 169.75 57.08
 -13 3 2 153.11 41.92
 13 -3 2 199.13 51.11
 13 -3 -2 150.22 45.21
 13 3 -2 229.97 49.61
 -13 3 2 172.17 47.46
 -14 3 -2 1507.85 153.65
 -14 -3 -2 1676.97 165.76
 14 3 -2 2026.97 149.4
 14 -3 -2 1290 158.3
 14 -3 2 1600.22 151.18
 14 -3 2 945.84 130.21
 -14 3 2 1326.03 136.31
 14 3 2 1483.34 141.6
 14 -3 -2 1815.43 178.91
 -14 -3 2 1953.88 151.13
 14 3 -2 1911.35 132.41
 -14 3 -2 1320.23 147.07
 14 3 -2 1632.86 137.61
 14 3 2 1636.31 157.32
 14 -3 2 1391.53 152.41
 14 -3 -2 1303.31 148.33
 -14 -3 -2 1549.03 148.73
 15 -3 2 40.88 22.27
 -15 -3 2 15.59 13.09
 15 -3 -2 21.83 23.55
 15 3 2 26.87 7.58
 -15 -3 -2 13.85 6.6
 15 3 -2 48.15 23.68
 -15 3 -2 45.28 26.24
 15 -3 2 36.75 24.49
 15 -3 -2 24.16 11.6
 15 -3 -2 39.56 37.44
 -15 -3 -2 50.12 28.22
 -15 3 -2 30.52 24.7
 15 3 -2 42.66 15.87
 -15 3 2 28.45 21.81
 15 3 2 18.02 21.26
 -16 3 2 518.74 56.25
 -16 -3 -2 581.6 94.27
 -16 -3 -2 470.58 97.76
 16 3 2 476.4 84.85
 16 3 -2 587.96 86.87
 -16 3 -2 423.49 59.95
 16 -3 -2 366.56 87.1
 16 -3 2 355.8 84.81
 -16 -3 2 808.61 121.36
 -16 3 2 413.37 75.49
 16 3 -2 518.99 83.55
 -16 3 -2 539.44 99.23
 -16 3 -2 361.06 78.39
 16 -3 -2 423.14 93.75
 -16 -3 2 650.12 91.49
 16 3 2 651.91 91.34
 -16 3 -2 346.38 55.5
 16 -3 -2 471.34 95.58
 16 3 2 410.42 84.3
 16 -3 2 541.87 103.47
 -16 -3 2 509.7 53.04
 -16 -3 2 451.27 53.22
 -17 -3 2 -3.07 8.23
 17 3 2 15.14 14.09
 17 3 -2 -5.81 6.45
 -17 3 2 0.99 6.66
 -17 -3 2 8.57 6.67
 17 3 2 3.82 9.18
 17 3 2 -3.88 9.35
 -17 3 2 9.98 16.57
 -17 -3 -2 8.2 7.92
 17 3 2 -16.44 16.57
 -17 3 -2 -10.44 14.17
 17 3 2 7.75 11.76
 17 3 2 -8.17 12.54
 -17 3 -2 1.72 5.47
 17 -3 2 0.58 14.08
 17 -3 -2 -5.09 9.61
 -17 3 -2 -2.51 3.29
 17 -3 -2 4.16 9.17
 -17 -3 -2 -7.95 9.29
 -17 -3 -2 -3.57 5.89
 -17 -3 -2 11.73 14.31
 -17 3 2 -2.09 7.33
 -17 -3 2 0.57 5.03
 17 3 -2 1.21 5.05
 -17 -3 2 0.23 3.87
 17 3 -2 -12.05 16.49
 17 -3 -2 16.52 20.88
 17 3 -2 -1.8 6.96
 -17 -3 2 11.54 15.85
 -17 -3 2 -2.79 1.81
 -17 3 -2 -3.29 10.16
 17 -3 -2 19.15 21.12
 -17 -3 2 -8.59 12.83
 -17 3 2 -12.46 11.28
 17 3 -2 -3.36 5.97
 -17 3 -2 -6.09 13.68
 -17 3 2 12.73 7.77
 -17 3 -2 -9.49 20.44
 -17 3 -2 2.08 5.23
 -17 -3 2 4.1 5.61
 17 3 -2 -39.42 23.44
 -17 -3 -2 -7.66 6.69
 17 3 -2 -0.61 4.97
 -17 3 2 0.72 1.62
 17 3 2 -1.56 7.36
 17 -3 2 -10.05 18.19
 -18 3 -2 6.56 5.58
 18 3 -2 13.27 10.11
 -18 3 2 1.18 2.34
 -18 3 2 -8.07 11.16
 18 3 -2 7.06 7.4
 -18 -3 -2 3.32 9.24
 18 -3 -2 76.2 42.93
 -18 3 -2 0.62 9.3
 -18 3 -2 3.77 10.61
 18 3 -2 -3.14 17.06
 -18 3 2 9.31 4.71
 -18 -3 2 4.8 6.58
 18 -3 2 -5.38 26.72
 -18 -3 -2 4.84 11.24
 -18 3 -2 5.55 10.48
 18 3 2 9.21 5.61
 18 3 -2 6.3 7.7
 -18 3 2 6.16 3.26
 -18 3 2 -7.75 8.82
 18 -3 -2 -5.37 11.38
 18 3 2 2.28 10.41
 -18 3 -2 12.68 15.99
 -18 -3 -2 -9.99 10.39
 -18 -3 2 0.83 4.79
 18 -3 -2 12.85 13.75
 18 3 2 -3.71 11.46
 -18 -3 2 9.22 9.73
 18 3 -2 3.09 10.66
 18 3 2 -9.23 11.87
 18 3 -2 -7.65 8.95
 18 3 2 4.44 4.03
 -18 3 -2 1.71 7.32
 -18 -3 2 -5.88 8.04
 -18 3 2 16.07 24.08
 -18 -3 -2 8.65 6.93
 -18 -3 -2 2.05 7.41
 18 3 -2 5.64 4.21
 18 3 2 -76.5 39.7
 -18 -3 2 -3.9 6.22
 18 -3 2 5.24 11.18
 -19 3 2 5.15 6.28
 19 3 2 20.88 7.88
 -19 3 -2 27.39 14.82
 -19 3 2 19.45 8.38
 -19 -3 2 31.94 13.93
 -19 -3 -2 31.68 17.38
 19 3 2 7.9 6.81
 19 3 2 13.7 8.96
 19 -3 -2 33.61 19.77
 -19 -3 -2 12.68 11.97
 -19 -3 -2 23.57 16.2
 -19 -3 2 27.47 14.76
 19 3 -2 21.05 10.08
 19 3 -2 20.42 9.66
 19 -3 -2 23.91 19.01
 -19 3 -2 28.25 15.05
 -19 -3 2 30.29 15.8
 19 3 -2 25.78 14.28
 19 3 2 56.06 24.72
 19 3 2 19.96 7.02
 19 3 -2 22.15 16.73
 -19 3 -2 42.2 20.23
 -19 3 -2 27.49 12.28
 19 3 -2 58.25 27.01
 -19 3 -2 22.96 13.26
 -19 3 2 25.47 12.67
 -19 -3 2 31.57 14.45
 -19 -3 -2 16.1 11.44
 19 3 -2 52.3 20.48
 -19 3 2 22.29 11.91
 -19 -3 2 15.19 9.39
 -19 3 2 26.45 15.86
 20 3 2 40.21 14.65
 -20 3 2 56.51 20.66
 -20 -3 2 37.15 15.69
 -20 -3 2 54.05 18.91
 -20 -3 -2 38.84 16.13
 -20 3 -2 39.69 21.28
 -20 -3 2 61.2 20.62
 -20 3 -2 36.28 17.99
 -20 -3 -2 22.61 13.62
 20 3 2 50.35 19.83
 20 3 2 53.29 23.9
 20 3 -2 37.47 13.18
 -20 3 2 49.5 18.26
 -20 -3 -2 36.95 17.61
 20 3 -2 48.36 22.13
 20 3 -2 51.58 17.9
 20 -3 -2 33.2 16.68
 -20 3 -2 39.18 16.83
 -20 3 -2 70.75 25.06
 20 3 -2 50.56 22.52
 20 -3 -2 31.16 13.79
 20 3 -2 91.42 35.23
 -20 -3 2 53.4 18.64
 20 3 2 60.76 29.06
 -20 -3 -2 62.09 21.72
 -20 3 2 62.26 20.64
 -20 -3 2 63.63 21.31
 20 3 -2 80.33 25.99
 20 3 2 38.7 18.81
 -20 3 2 47.4 17.81
 -21 -3 2 3.25 5.04
 -21 3 2 8.09 6.4
 -21 3 2 5.25 7.6
 -21 -3 2 -2.37 6.52
 21 3 2 15.65 12.54
 -21 -3 2 -0.16 6.38
 -21 -3 -2 3.35 9.36
 21 3 2 3.13 3.44
 21 3 -2 5.44 6.75
 -21 -3 -2 -3.71 9.11
 -21 -3 -2 11.2 10.11
 21 3 2 -7.05 8.52
 -21 3 -2 1.26 3.81
 21 3 -2 17.3 13.16
 -21 3 -2 -6.77 12.18
 -21 3 -2 -5.69 4.34
 21 3 -2 9.72 9.6
 21 -3 2 1.97 8.62
 21 -3 -2 8.39 9.09
 -21 -3 2 9.39 9.95
 -21 3 -2 3.57 5.03
 -21 3 2 1.49 4.53
 21 -3 -2 10.82 8.69
 21 3 2 6.01 9.21
 -21 -3 2 11.75 10.92
 -21 -3 -2 4.85 8.96
 21 3 -2 2.2 4.93
 21 3 2 21.08 19.79
 21 3 -2 6.98 5.04
 -21 3 2 20.65 12.23
 21 3 -2 0.73 4.51
 21 3 2 12.73 5.04
 -22 -3 2 42.59 17.14
 22 3 2 51.59 19.4
 -22 3 -2 23.87 15.86
 -22 -3 2 57.89 21.11
 -22 -3 -2 27.24 12.49
 -22 3 2 36.4 16.15
 -22 -3 -2 56.33 21.03
 -22 3 -2 14.22 12.93
 -22 3 2 22.49 12.77
 22 3 2 33.57 22.96
 22 3 2 38.34 16.88
 22 3 -2 29.54 14.06
 22 -3 -2 19.24 13.12
 22 3 2 33.62 19.15
 22 3 -2 35.29 18.72
 22 3 -2 47.97 23.84
 22 -3 2 21.89 15.89
 -22 3 -2 31.41 15.61
 -22 -3 -2 22.08 16.21
 22 3 2 22.39 15.62
 22 -3 -2 13.91 10.74
 -22 3 -2 23.37 14.91
 -22 3 2 33.49 14.17
 22 3 -2 26.76 16.86
 -22 -3 2 47.04 17.36
 -22 -3 2 28.41 12.36
 -22 -3 -2 40.5 19.41
 22 3 -2 46.73 20.96
 22 -3 2 31.85 17.53
 22 3 2 37.96 19.2
 22 3 -2 37.32 16.28
 -22 3 2 22.06 13.08
 -22 -3 2 34.23 16.95
 23 3 2 84 27.38
 -23 3 2 66.86 21.5
 -23 -3 2 87.61 25.82
 -23 -3 -2 89.45 26.68
 -23 -3 -2 78.19 25.72
 -23 3 -2 58.91 23.48
 -23 3 2 95.13 26.05
 23 3 2 94.82 30.3
 -23 3 -2 59.04 21.05
 23 3 2 57.01 22.17
 23 3 -2 55.22 21.09
 -23 3 -2 91.45 29.26
 -23 -3 2 61.39 21.03
 -23 3 2 76.44 22.76
 23 -3 -2 37.32 18.02
 -23 3 -2 89.07 30.33
 23 3 2 53.48 23.88
 23 -3 -2 43.28 19.47
 -23 3 -2 49.2 19.94
 23 3 2 49.11 22.32
 23 3 2 51.85 27.28
 23 3 -2 71.86 25.65
 -23 -3 -2 91.41 27.8
 23 -3 2 44.3 18.6
 23 3 -2 40.19 14.9
 -23 -3 -2 99.03 26.22
 -23 -3 2 80.35 22.8
 -23 -3 2 77.86 24.31
 23 3 -2 87.16 29.23
 23 -3 2 29.63 11.41
 23 3 -2 45.71 18.49
 -23 3 2 90.67 27.42
 23 3 -2 100.75 36.39
 -23 -3 2 61.93 21.34
 24 3 2 260.51 58.5
 24 3 -2 283.9 43.62
 24 3 2 354.99 55.2
 -24 3 -2 320.21 53.67
 -24 -3 -2 339.29 54.17
 24 3 -2 253.37 49.15
 -24 -3 -2 421.81 56.06
 -24 3 2 391.57 53.6
 24 3 2 283.14 52.48
 24 -3 -2 248.04 49.41
 24 3 2 266.06 49.02
 -24 -3 -2 371.31 53.28
 -24 3 -2 369.69 56.05
 -24 -3 -2 400.75 59.24
 -24 3 -2 325.9 48.95
 24 3 2 365.56 56.92
 24 -3 2 234.47 46.93
 24 -3 -2 296.16 52.72
 24 3 -2 516.77 79.87
 24 -3 2 340.34 54.93
 -24 -3 2 392.6 54.94
 24 3 -2 303.47 50.71
 -24 3 2 312.66 45.7
 -24 -3 2 404.86 51.28
 -24 -3 2 336.97 48.56
 -24 3 -2 270.69 61.72
 24 3 -2 418.38 62.6
 24 3 2 253.56 50.04
 -24 3 2 482.13 59.78
 -24 -3 2 330.35 48.78
 24 3 -2 254.49 44.6
 -24 3 2 262.49 43.28
 25 3 -2 -2.61 3.6
 25 -3 2 1.31 5.5
 -25 3 2 10.31 8.36
 -25 3 -2 2.14 5.33
 -25 -3 2 19.06 8.97
 -25 -3 -2 5.15 4.62
 -25 -3 -2 19.77 12.23
 25 -3 -2 0.81 4.65
 -25 3 2 6.62 5.79
 25 3 2 18.74 12.16
 25 -3 -2 1.3 2.84
 -25 3 -2 -4.93 9.44
 25 3 -2 -5.11 11.86
 25 3 -2 -2.27 9.79
 25 3 2 12.47 11.04
 25 3 2 1.62 3.51
 25 3 -2 -2.67 7.83
 25 -3 -2 3.31 9.06
 -25 3 -2 11.07 7.22
 25 3 -2 8.6 7.14
 25 -3 -2 16.13 13.82
 25 3 2 1.39 14.07
 25 -3 2 15.55 14.2
 -25 -3 2 13.62 7.12
 25 3 -2 10.72 15.38
 -25 -3 -2 15.78 10.53
 25 3 2 24.17 14.83
 -25 -3 2 17.19 10.84
 -25 -3 -2 22.03 15.09
 25 3 2 6.2 3.32
 -25 3 2 19.36 9.81
 -25 3 2 11.97 9.17
 -25 -3 2 13.15 9.97
 26 -3 -2 215.24 40.66
 -26 3 -2 310.22 46.66
 26 3 -2 214.14 37.36
 -26 3 2 404.22 52.82
 -26 -3 -2 379.53 53.37
 26 -3 -2 179.07 41.31
 -26 3 -2 320.78 51.34
 -26 -3 -2 356.23 53.31
 -26 3 2 402.55 52.25
 -26 3 2 289.71 42.7
 26 3 -2 212.12 43.67
 -26 -3 -2 255 49.84
 26 -3 -2 140.1 33.7
 26 -3 2 207.75 42.32
 -26 3 2 288.52 44.77
 -26 3 -2 304.32 53.16
 26 3 2 289.09 46.53
 26 3 2 227.23 44.27
 -26 -3 2 281.98 44.01
 -26 -3 2 318.35 46.33
 -26 -3 2 299.52 44.53
 26 3 -2 454.25 70.05
 26 3 -2 227.31 39.61
 26 3 2 158.1 33.91
 26 3 2 138.48 37.81
 26 -3 -2 207.62 41.81
 -26 -3 2 288.66 41.57
 -26 -3 -2 316.72 48.06
 26 3 -2 291.59 44.21
 26 3 2 231.81 45.39
 26 -3 2 224.47 39.74
 -27 -3 2 -2.18 6.57
 -27 -3 -2 -10.63 12.01
 27 -3 -2 -0.23 2.66
 27 -3 -2 -6.05 8.77
 27 -3 2 7.1 13.4
 27 3 -2 -8.14 7.62
 -27 3 2 23.17 14.92
 -27 3 -2 -4.81 7.35
 27 3 -2 -19.99 14.33
 -27 -3 2 3.96 1.82
 -27 -3 -2 -13.51 14.42
 -27 3 2 1.91 6
 27 -3 -2 -1.37 8.84
 27 3 2 1.03 7.98
 27 -3 2 -3.57 3.8
 -27 -3 -2 9.93 10.09
 27 3 2 -4.01 11.57
 27 -3 -2 -0.93 5.72
 27 3 2 -2.87 10.1
 -27 3 -2 -8.53 9.23
 27 3 -2 -5.24 8.29
 27 3 2 -2.57 8.3
 -27 3 2 -10.43 9.96
 27 -3 2 -9.21 4.57
 -27 3 -2 -6.05 11.95
 -27 -3 -2 6.72 6.12
 27 3 -2 -4.13 9.25
 27 3 2 -1.92 8.29
 -27 3 2 -1.57 4.26
 -27 -3 2 -1.86 7.14
 -27 -3 2 2.73 7.13
 -28 3 2 81.53 21.58
 28 -3 -2 33.29 15.03
 -28 -3 -2 83.59 23.76
 28 -3 2 38.9 15.38
 -28 3 -2 91.71 24.15
 -28 3 2 98.42 22.86
 -28 -3 2 97.63 24.4
 -28 3 -2 110.97 28.46
 28 3 2 44.39 14.12
 28 -3 2 43.39 15.2
 -28 -3 -2 104.3 26.11
 28 -3 -2 43.41 16.87
 -28 -3 2 55.71 16.69
 -28 -3 -2 105.29 25.5
 28 3 -2 43.79 17.63
 28 -3 -2 10.16 6.24
 28 3 2 44.45 16.73
 -28 3 2 87.55 22.25
 28 -3 2 41.25 15.03
 -28 -3 2 32.26 11.82
 28 3 2 39.46 17.63
 28 3 -2 43.39 15.15
 28 -3 -2 34.4 16.1
 28 3 -2 42.01 16.38
 -28 -3 -2 82.88 25.61
 28 3 2 33.58 13.46
 28 -3 2 48.39 16.08
 -28 3 2 82.46 21.08
 -28 -3 2 72.24 20.49
 -29 -3 -2 -2.23 3.83
 29 -3 -2 -4.79 8.16
 -29 3 -2 -10.79 11.21
 29 -3 -2 2.71 6.05
 29 3 -2 -14.36 12.86
 29 -3 -2 6.04 5.95
 29 3 2 -11.41 9.53
 29 -3 2 -6.63 7.21
 29 -3 2 6.81 9.21
 -29 -3 -2 -10.92 10.1
 -29 -3 -2 2.29 2.97
 29 3 -2 6.96 7.94
 29 -3 -2 -4.64 5.6
 29 3 2 16.92 10.14
 29 -3 2 -2.68 4.12
 -29 3 -2 -3.57 3.82
 29 3 2 14.6 12.69
 -29 3 2 -15.59 8.96
 -29 -3 2 -12.07 8.18
 -29 3 2 -0.64 2.52
 29 3 -2 4.18 5.51
 -29 -3 2 -4.05 9.93
 -29 -3 -2 5.44 6.97
 29 3 2 4.54 8.06
 -29 -3 2 1.2 2.55
 -29 -3 2 -3.04 3.28
 -29 3 2 11.35 10.8
 -30 -3 2 9.54 4.14
 -30 -3 -2 14.95 11.85
 -30 -3 -2 10.99 6.92
 30 -3 -2 2.85 4.83
 30 -3 2 7.87 6.59
 30 3 -2 14.53 9.68
 30 -3 2 6.3 6.97
 30 -3 -2 7.7 5.03
 -30 3 -2 11.26 9.67
 -30 3 -2 18.9 10.99
 30 3 -2 8.97 9.35
 30 3 2 1.91 3.33
 -30 -3 -2 17.49 9.69
 -30 3 2 3.19 3.84
 30 -3 -2 8.48 5.19
 -30 -3 -2 13.49 7.89
 30 -3 2 -2.88 4.85
 -30 3 2 8.84 4.68
 -30 -3 2 18.42 9.59
 30 -3 -2 4.03 7.14
 30 3 2 -0.53 6.58
 30 3 2 -1.54 6.35
 -30 -3 2 4.64 2.22
 -30 -3 2 -3.65 6.25
 -31 3 -2 4.62 6.04
 -31 3 -2 -0.95 4.28
 31 -3 2 -0.51 4.85
 31 3 -2 -8.09 7.12
 -31 3 2 22.56 10.28
 31 3 2 -1 4.31
 31 -3 -2 6.69 6.44
 31 3 2 6.61 7.06
 0 -4 2 474.39 66.32
 0 -4 2 468.61 57.72
 0 -4 -2 420.82 59.82
 0 -4 -2 561.48 49.15
 0 4 -2 549.99 69.34
 0 -4 -2 513.6 64.42
 0 4 -2 433.38 60.07
 0 4 2 475.1 36.81
 0 4 -2 631.62 41.96
 0 4 2 447.8 64.44
 0 4 2 451.76 61.46
 0 4 -2 432.23 60.63
 -1 -4 -2 58.21 20.71
 1 4 2 52.6 18.7
 -1 4 -2 60.22 22.37
 -1 4 2 63.33 22.54
 -1 -4 -2 66.03 22.06
 -1 4 -2 58.88 23.97
 -1 4 2 45.43 18.72
 -1 4 -2 56.63 23.03
 1 -4 -2 76.37 20.67
 1 -4 -2 83.79 25.05
 -1 4 2 50.18 22.2
 1 4 2 49.76 22.42
 1 -4 2 66.18 23.18
 1 4 -2 72.3 22.75
 1 -4 -2 56.48 21.23
 -1 -4 2 91.07 25.86
 1 -4 2 61.2 21.08
 1 4 2 60.05 20.6
 1 4 2 68.82 14.7
 -1 -4 -2 53.07 21.21
 1 4 -2 50.79 19.84
 -1 -4 -2 72.38 15.22
 1 4 -2 78.19 16.62
 -1 -4 2 57.1 28.5
 -2 4 -2 206.41 41.13
 2 4 2 211.94 43.5
 -2 -4 -2 222.62 41.53
 -2 -4 -2 226.45 44.35
 2 -4 -2 213.71 42.05
 2 -4 -2 233.35 37.9
 -2 4 2 188.32 40.57
 -2 -4 -2 217 41.25
 2 4 -2 229.91 42.38
 -2 4 2 225.89 44.43
 2 -4 -2 179.66 39.02
 -2 -4 2 262.03 46.62
 2 -4 2 254.33 39.89
 2 4 -2 233.99 41.11
 -2 -4 2 258.37 51.85
 -2 4 -2 260.32 50.89
 -2 4 -2 212.11 44.08
 2 -4 2 207.57 41.73
 2 4 2 190.37 26.08
 2 4 -2 300.69 34.73
 2 4 2 261.64 45.59
 2 -4 2 209.97 41.41
 2 4 2 199.61 40.72
 -2 4 2 197.98 41.42
 3 -4 2 31.23 13.93
 3 -4 2 21.01 11.4
 -3 -4 2 26.66 16.34
 -3 4 -2 31.56 18.35
 -3 4 -2 39.8 20.09
 3 4 2 22.01 13.98
 3 -4 -2 22.53 14.06
 3 4 -2 33.53 13.5
 -3 -4 2 23.69 8.54
 3 -4 -2 31.6 13.57
 3 -4 -2 12.24 7.65
 -3 -4 -2 16.96 10.52
 3 4 2 15.48 9.74
 -3 4 2 11.18 10.34
 -3 4 -2 10.81 6.47
 3 -4 2 31.84 18.71
 -3 -4 -2 32.27 16.6
 3 4 -2 24.34 14.94
 -3 -4 -2 26.91 15.52
 -3 4 2 24.05 13.66
 -3 -4 2 23.81 12.86
 -3 4 -2 29.26 16.26
 3 4 -2 17.95 10.27
 3 4 2 25.79 13.69
 4 4 -2 -0.36 3.32
 4 -4 2 3.54 8.11
 -4 -4 2 1.36 3.64
 -4 4 2 6.18 13
 4 -4 -2 -4 9.03
 4 4 2 11.86 11.59
 -4 4 -2 4.57 4.08
 -4 4 2 0.13 5.87
 -4 4 -2 16.07 15.21
 -4 -4 2 9.5 11.03
 4 -4 -2 6.82 9.26
 4 4 -2 9.29 6.45
 -4 -4 2 0.3 4.82
 -4 -4 -2 5.26 6.39
 -4 -4 -2 1.94 2.44
 -4 -4 -2 -0.78 4.91
 -4 4 -2 15.75 8.23
 4 4 2 -17.53 12.22
 -4 4 -2 -2.07 12.73
 4 -4 2 6.27 5.83
 4 4 -2 5.99 7.85
 4 4 2 12.19 11.72
 -4 4 2 -0.22 6.61
 4 -4 2 -6.88 9.19
 5 4 -2 8.21 6.15
 -5 4 2 -1.95 12.6
 -5 4 2 6.22 5.21
 5 -4 2 2.23 5.59
 -5 -4 -2 -0.07 6.24
 -5 -4 -2 -4.73 6.25
 -5 4 2 9.5 6.99
 -5 4 -2 6.28 12.24
 5 -4 2 -2.65 3.45
 5 -4 -2 8.89 9.82
 -5 -4 2 12.21 9.24
 5 -4 -2 4.53 3.97
 -5 -4 -2 3.96 3.91
 -5 4 -2 6 12.14
 -5 4 -2 -3.91 9.02
 5 4 2 5.45 8.63
 -5 -4 2 -5.08 5.39
 5 4 2 2.42 8.03
 5 4 -2 3.58 6.06
 5 4 -2 9.9 12.85
 -5 4 -2 2.79 3.93
 5 -4 2 1.73 6.25
 6 -4 -2 69.39 27.91
 6 -4 2 41.86 19.46
 -6 4 2 63.22 27.67
 -6 -4 -2 57.49 23.24
 -6 -4 -2 51.54 22.71
 6 4 2 37.43 19.68
 6 4 -2 50 19.99
 6 4 2 39.57 14.69
 -6 4 -2 56.64 26.38
 -6 4 -2 49.71 23.26
 -6 4 -2 48.74 21.66
 -6 -4 -2 44.92 19.81
 6 -4 -2 56.1 25.53
 6 4 -2 63.09 21.22
 -6 4 2 51.02 21.39
 -6 -4 2 44.64 20.47
 6 -4 2 55.51 22.57
 -6 -4 2 62.24 17.99
 -6 4 2 51.77 17.12
 -7 4 -2 424.68 72.65
 -7 -4 2 731.63 66.21
 7 4 -2 559.45 64.33
 -7 -4 -2 540.14 77.42
 7 4 2 585.43 74.2
 -7 4 -2 368.74 65.41
 7 -4 -2 470.22 74.87
 -7 -4 2 524.59 69.83
 7 -4 2 508.43 66.15
 -7 -4 -2 595.78 73.96
 -7 4 2 500.89 70.92
 -7 -4 -2 519.69 66.78
 7 -4 -2 512.05 77.99
 7 4 2 428.92 65.07
 -7 4 2 511.22 75.41
 7 4 -2 565.85 68.04
 -7 4 -2 482.39 78.14
 -7 4 2 502.2 58.48
 7 -4 2 509.75 67.54
 8 -4 2 58.13 25.11
 8 -4 2 82.75 27.08
 8 4 -2 135.13 32.35
 8 4 2 73.93 24.38
 -8 -4 -2 80.26 31.89
 -8 4 -2 48.64 25.3
 -8 4 -2 94.97 34.68
 -8 -4 2 124.68 28.52
 8 4 2 107.06 32.22
 -8 4 2 103.04 32.53
 8 -4 -2 75.89 32.5
 8 -4 -2 82.93 33.93
 -8 4 2 93.31 32.98
 -8 -4 2 91.74 30.7
 -8 -4 -2 104.38 31.25
 8 4 -2 116.52 31.68
 8 4 -2 118.72 30.39
 -8 -4 -2 75.76 25.99
 -8 4 2 86.21 23.9
 -8 4 -2 62.47 25.96
 8 -4 2 93.44 29.97
 9 -4 2 177.62 41.21
 9 4 -2 220.23 41.11
 9 -4 2 145.12 39.35
 9 -4 -2 140.65 42.63
 9 4 2 128.6 35.26
 -9 4 -2 142.75 44.5
 9 4 2 171.32 41.31
 -9 -4 -2 161.43 47.72
 -9 -4 2 278.97 45.47
 9 4 -2 224.39 42.92
 -9 -4 -2 134.59 39.1
 -9 4 -2 165.87 46.25
 -9 -4 -2 149.07 36.23
 -9 4 2 183.44 43.76
 -9 4 2 177.87 47.17
 -9 -4 2 199.42 44.3
 -9 4 2 144.87 34.86
 9 4 -2 189.38 41.32
 9 -4 -2 165.41 48.61
 9 -4 2 173.18 41.54
 10 -4 2 185.88 42.87
 10 -4 2 140.19 41.58
 10 4 -2 237.08 45.45
 10 -4 -2 142.13 44.73
 -10 -4 2 185.07 43.04
 10 4 2 143.75 40.14
 10 -4 -2 167.37 48.84
 -10 4 -2 128.67 41.5
 -10 -4 -2 109.75 38.05
 -10 4 2 154.61 37.4
 -10 4 2 236.64 52.86
 -10 -4 -2 150.52 41.02
 -10 4 -2 184.2 49.58
 10 4 -2 190.76 39.89
 -10 4 2 199.75 53.09
 -10 -4 2 267.65 45.31
 10 4 -2 188.23 42.2
 -10 -4 -2 173.75 41.12
 10 -4 2 168.7 42.57
 10 4 2 169.74 38.71
 11 -4 2 140.49 46.1
 -11 -4 2 244.62 50.82
 11 4 -2 264.76 48.52
 -11 4 -2 144.01 46.93
 11 -4 2 198 42.83
 -11 -4 -2 170.64 44.47
 -11 4 -2 176.44 51.98
 11 4 -2 215.58 47.12
 11 -4 -2 197.11 59.78
 -11 -4 2 274.65 49.22
 11 -4 -2 168.82 51.91
 -11 4 2 188.19 54.45
 -11 4 2 218.02 50.02
 -11 -4 -2 192.03 47
 11 4 2 183.47 43.98
 11 4 -2 263.87 47.12
 11 4 2 144.45 36.81
 -11 -4 -2 148.17 47.75
 11 -4 2 206.96 47.38
 -11 4 2 172.32 40.75
 12 -4 2 40.1 23.01
 -12 -4 2 80.88 30.84
 -12 -4 2 85.11 31.54
 -12 -4 -2 58.86 29.01
 -12 4 -2 35.65 22.53
 -12 4 2 56.4 31.66
 12 -4 -2 38.68 31.24
 -12 4 -2 53.13 25.94
 -12 -4 2 88.06 28.97
 12 4 -2 118.23 33.49
 12 -4 -2 53.03 34.96
 -12 -4 -2 63.11 29.69
 12 4 -2 83.18 29.58
 12 4 2 42.62 24.19
 -12 4 2 39.66 16.91
 12 -4 2 75.71 29.47
 12 4 -2 129.68 33.83
 -13 -4 2 24.36 18.14
 13 -4 -2 6.52 13.09
 -13 -4 -2 13.24 17.87
 -13 4 -2 4.27 3.06
 13 4 -2 11.87 11.91
 13 4 -2 -7.16 3.12
 13 4 2 17.2 11.9
 -13 4 2 -0.07 15.74
 13 -4 -2 -3.62 11.82
 -13 -4 2 2.15 7.8
 -13 4 2 2.79 12.21
 -13 -4 -2 -4.51 20.58
 -13 4 -2 -11.37 13.68
 13 -4 2 25.91 21.69
 14 -4 2 11.68 9.09
 14 -4 -2 14.16 15.9
 14 4 2 21.34 15.3
 -14 4 -2 9.24 15.51
 14 -4 2 5.47 13.38
 -14 -4 -2 -37.01 25.38
 -14 -4 2 18.45 25.44
 14 -4 -2 18.4 6.47
 -14 4 -2 24.81 20.56
 -14 -4 -2 19.23 14.28
 -14 -4 2 -10.53 21.05
 -14 4 2 3.59 12.36
 14 4 -2 7.54 15.05
 14 4 -2 37.02 21.99
 -14 4 2 22.19 22.16
 -15 -4 2 8.36 7.08
 15 -4 2 15.8 7.32
 15 4 2 14.82 6.13
 -15 -4 -2 12.82 19.69
 -15 4 -2 2.2 11.04
 15 -4 -2 12.75 8.32
 15 -4 2 5.19 16.44
 -15 -4 2 -3.01 16.24
 -15 -4 -2 6.69 11.16
 -15 4 -2 25.04 26.02
 15 -4 -2 10.67 7.03
 15 4 -2 35.3 24.17
 -15 4 2 27.7 22.03
 15 4 -2 23.84 26.83
 16 4 -2 18.15 15.33
 -16 4 -2 8.87 8.19
 16 4 2 14.59 3.14
 -16 -4 2 11.85 7
 16 -4 2 23.99 23.49
 -16 4 -2 15.78 7.69
 -16 4 2 13.81 9.91
 -16 4 2 9.22 8.67
 -16 -4 -2 2.5 6.81
 -16 4 -2 7.06 12.41
 -16 -4 -2 17.72 12.32
 -16 4 -2 2.51 7.07
 -16 4 -2 30.5 30.05
 16 4 2 15.67 9.78
 16 4 -2 13.07 9.06
 16 4 -2 20.22 9.48
 -16 4 -2 19.46 10.52
 -16 -4 2 14.48 8.19
 16 4 2 7.29 7.47
 16 4 -2 14.11 7.5
 -16 -4 -2 14.53 9.35
 16 -4 -2 -0.62 16.16
 -16 4 2 16.75 11.03
 16 4 -2 29.04 19.5
 -16 -4 2 50.15 32.18
 16 4 -2 14.75 11.24
 16 4 2 7.22 13.87
 -16 4 2 24.08 17.69
 16 -4 -2 -47.89 34.17
 -16 -4 -2 1.49 19.44
 -16 -4 -2 -8.86 15.41
 -16 4 -2 5.32 5.38
 -16 4 2 22.39 10.18
 16 -4 2 15.83 25.71
 16 4 -2 23.95 12.12
 -16 -4 -2 6.02 3.6
 16 4 2 -50.89 28.96
 16 4 2 20.4 12.68
 -16 4 2 10.58 9.88
 17 4 2 29.68 15.59
 -17 4 2 31.33 12.58
 -17 4 -2 19.07 16.82
 17 4 -2 61.18 25.99
 -17 -4 -2 32.77 16.24
 17 -4 2 -2.91 24.84
 17 4 2 25.78 13.02
 -17 4 -2 37.38 18.01
 -17 -4 -2 10.37 14.72
 17 4 -2 41.6 14.94
 17 4 2 44.8 20.22
 -17 -4 2 85.85 44.58
 17 4 -2 30.3 13.7
 17 -4 -2 24.68 12.55
 -17 4 -2 7.39 8.36
 -17 4 2 43.11 17.12
 -17 4 -2 30.21 15.82
 17 4 -2 44.43 17.03
 17 -4 -2 -13.42 17.38
 -17 4 2 28.72 11.6
 17 -4 -2 17.51 26.66
 -17 4 -2 59.49 33.96
 17 4 2 35.65 18.43
 -17 4 -2 32.61 11.1
 -17 -4 -2 36.63 14.27
 -17 4 -2 29.82 12.91
 17 4 -2 52.37 27.52
 -17 -4 2 29.06 13.36
 -17 4 2 22.84 11.46
 17 4 -2 49.56 18.96
 -17 -4 -2 19.65 12.85
 -17 -4 2 36.15 17.39
 17 4 2 24.31 13.43
 -17 4 -2 37.63 16.72
 -17 -4 -2 41.92 16.44
 17 -4 2 38.55 28.15
 -17 -4 2 36.89 15.85
 17 4 2 -4.76 23.66
 -17 4 2 18.13 5.69
 -18 -4 2 26.21 13.99
 -18 4 2 25.06 12.93
 18 4 -2 31.15 12.98
 -18 4 2 22.32 11.13
 18 4 2 17.8 12.7
 -18 -4 -2 19.27 12.32
 -18 -4 2 32.21 24.97
 -18 4 -2 29.82 15
 -18 -4 -2 28.88 18.47
 -18 -4 2 36.04 16.02
 -18 -4 2 22.31 15.05
 18 4 2 44.06 21.74
 18 -4 -2 -6.07 12.71
 -18 4 -2 21.35 15.1
 -18 4 -2 25.1 14.07
 18 4 -2 23.22 12.11
 -18 4 -2 34.81 15.28
 -18 -4 -2 23.33 12.33
 18 -4 -2 69.38 41.8
 18 4 2 30.28 20.81
 18 4 -2 36.46 15.67
 18 4 2 17.65 11.87
 -18 -4 -2 26.26 13.96
 18 4 -2 41.74 17.89
 -18 4 -2 19.15 16.03
 -18 4 2 24.11 12.16
 -18 -4 2 48.22 15.15
 18 4 2 45.42 23.71
 18 4 -2 46.79 28.47
 -18 4 -2 23.97 15.95
 -18 4 2 22.34 12.84
 19 4 2 135.66 34.81
 -19 4 2 112.56 28.79
 -19 -4 -2 110.43 31.6
 -19 -4 -2 79.83 23.69
 -19 4 -2 60.17 30.65
 -19 4 -2 116.28 28.66
 -19 4 -2 134.12 31.34
 -19 4 2 108.68 26.12
 19 4 2 143.09 33.92
 -19 -4 -2 107.12 29.43
 19 4 2 116.29 31.71
 -19 -4 2 154.41 31.97
 -19 -4 -2 110.65 28.13
 19 4 -2 125.39 31.69
 19 4 -2 125.82 28.48
 -19 -4 2 115.96 28.32
 -19 -4 2 149.67 30.58
 -19 -4 2 136.09 29.9
 19 4 -2 166.16 44.56
 -19 4 -2 102.13 29.29
 19 4 2 70.52 26.97
 -19 4 -2 122.84 35.16
 -19 4 2 124.41 29.37
 19 4 -2 131.02 33.21
 19 4 -2 136.05 34.01
 19 4 2 115.73 31.29
 -19 4 2 135.22 30.69
 -19 -4 2 108.81 27.62
 19 -4 -2 59.23 25.1
 -20 4 2 3.65 5.23
 -20 -4 2 33.19 13.84
 20 4 -2 5.87 5.49
 -20 -4 -2 2.65 3.35
 -20 -4 -2 12.03 8.04
 -20 -4 -2 11.52 8.19
 -20 4 -2 13.12 11.41
 -20 -4 2 19.84 12.97
 -20 4 -2 22.12 15.14
 20 4 2 15.43 11.51
 -20 -4 2 39.01 18.71
 20 4 -2 11.86 8.32
 20 -4 -2 19.47 17.07
 -20 4 2 14.2 9.73
 20 4 2 15.34 15.53
 20 4 -2 18.61 15.23
 20 4 2 20.9 11.43
 20 4 2 -1.59 10.12
 20 4 2 37.85 19.43
 -20 4 -2 -3.49 6.13
 -20 4 -2 11.71 3.71
 20 4 -2 15.41 12.73
 -20 -4 -2 6.66 8.89
 -20 4 2 13.77 11.2
 -20 4 2 14.05 8.72
 -20 4 -2 14.13 11.31
 20 4 -2 14.25 15.47
 -20 -4 2 26.04 15.64
 -20 -4 2 17.17 10.45
 -21 -4 2 33.02 15.98
 -21 4 2 34.49 15.91
 -21 -4 2 67.99 21.71
 21 4 2 50.13 21.25
 -21 -4 -2 29.03 17.11
 -21 4 -2 38.64 22.08
 -21 4 -2 39.54 17.87
 -21 4 -2 54.35 21
 -21 4 -2 45.04 18.98
 -21 -4 -2 68.66 26.19
 21 4 -2 56.77 21.5
 21 4 -2 51.77 19.79
 21 -4 -2 29.89 15.93
 21 4 -2 57.48 22.42
 -21 4 -2 46.62 18.42
 21 4 2 41.85 19.76
 -21 -4 -2 65.96 22.57
 21 4 -2 73.57 30.2
 21 4 2 5.03 9.14
 21 4 2 49.69 22.64
 -21 -4 2 52.53 18.37
 -21 4 2 53.94 19.21
 -21 -4 2 77.32 23.34
 -21 -4 -2 37.21 20.31
 21 4 -2 59.48 23.25
 21 4 2 60.6 25.44
 21 -4 2 40.79 19.18
 -21 4 2 49.93 17.96
 -21 4 2 50.02 19.25
 -21 -4 2 45.95 19.14
 -22 -4 2 14.11 9.4
 22 4 2 22.46 18.14
 -22 4 2 5.56 9.5
 -22 -4 -2 5.63 10.67
 -22 -4 2 21.48 13.19
 -22 4 -2 17.72 13.85
 -22 -4 2 8.35 8.29
 22 4 -2 11.79 11.13
 -22 -4 -2 5.06 3.22
 22 4 -2 6.42 4.07
 -22 4 -2 -0.48 2.85
 -22 -4 -2 21.42 13.03
 22 4 2 1 9.27
 22 4 2 2.58 3.45
 22 4 -2 8.26 8.31
 22 -4 -2 9.79 10.74
 22 4 2 15.06 12.62
 22 4 -2 1.75 4.77
 -22 4 -2 12.72 11.61
 22 4 2 0.2 8.58
 -22 4 -2 14.29 9.66
 -22 4 -2 -19.45 13.44
 -22 4 2 6.84 2.26
 -22 4 2 6.44 4.9
 -22 -4 2 10.54 9.68
 -22 -4 -2 1.63 7.29
 -22 -4 2 17.98 10.99
 22 4 -2 9.73 6.96
 22 -4 2 -2.8 11.78
 -22 4 2 18.67 11.52
 -23 -4 2 7.19 7.17
 -23 -4 2 -8.5 10.44
 -23 4 2 1.34 4.92
 -23 -4 -2 5.88 9.86
 -23 4 -2 -6.6 5.06
 23 4 2 22.44 13.25
 23 -4 2 -8.31 10.48
 23 4 -2 0.94 5.07
 -23 -4 -2 0.57 4.96
 23 4 2 23.58 17.79
 -23 -4 -2 -8.98 11.05
 23 -4 -2 4.04 4.26
 -23 4 -2 0.82 2.83
 23 4 -2 -3.72 9.36
 -23 -4 -2 -2.71 9.75
 -23 4 -2 18.56 11.49
 -23 -4 2 -36.04 16.33
 23 4 -2 -7.88 7.63
 23 4 2 2.84 5.87
 -23 4 -2 8.39 10.23
 -23 4 -2 10.31 13.78
 -23 4 2 -1.76 8.33
 -23 -4 2 1.95 8.71
 23 4 -2 12.8 11.7
 23 4 2 7.06 5.48
 23 4 2 4.41 3.53
 23 -4 2 -4.63 5.58
 -23 4 2 8 5.37
 -23 4 2 12.8 11.36
 -23 -4 2 3.07 5.44
 23 4 -2 5.97 6.5
 -24 4 -2 4.21 8.1
 24 4 2 9.99 14.91
 -24 4 2 2.7 4.6
 24 -4 2 -0.67 4.86
 24 -4 2 -11.8 13.67
 -24 4 -2 -6.74 10.75
 -24 -4 2 9.03 8.44
 24 -4 -2 11.14 9.93
 -24 -4 -2 3.21 5.32
 24 4 2 -7.37 16.5
 -24 -4 -2 -1.71 1.97
 -24 -4 2 6.25 8.11
 24 4 2 4.94 7.06
 24 4 -2 2.73 4.98
 24 -4 -2 11.88 14.37
 -24 -4 2 7.74 8.3
 -24 4 -2 5.92 5.34
 -24 4 -2 -4.06 8.58
 -24 -4 -2 7.15 3.04
 24 4 -2 -1.81 8.81
 24 4 -2 -16.46 15.64
 24 4 2 -3.77 8.95
 -24 4 2 3.19 9.55
 24 4 -2 6.91 9.8
 -24 -4 2 -3.5 9.38
 -24 -4 -2 0.74 5.29
 -24 4 2 5.7 6.63
 24 4 -2 -4.18 5.61
 24 4 2 -2.25 7.2
 -24 -4 2 -3.09 2.06
 -24 4 2 3.69 2.63
 -25 4 2 33.16 13.95
 -25 -4 2 32.11 13.12
 -25 -4 -2 17.71 9.93
 -25 -4 2 31.88 13.62
 25 4 2 22.56 8.98
 25 -4 2 28.57 15.25
 -25 4 2 18.57 10.63
 25 4 -2 31.19 14.65
 25 4 -2 19 12.97
 25 -4 2 15.34 12.38
 25 4 -2 29.84 15.09
 25 4 2 -4.26 8.25
 25 4 2 29.25 15.78
 -25 -4 -2 55.42 21.19
 -25 4 2 32.69 15.55
 25 4 2 32.72 15.65
 -25 4 -2 34.52 16.98
 -25 4 -2 25 13.71
 25 -4 -2 20.41 12.01
 25 4 -2 36.84 20.93
 -25 4 2 29.49 14.22
 25 -4 -2 17.17 14.85
 -25 -4 -2 26.98 14.75
 25 -4 -2 27.81 15.91
 -25 -4 -2 21.81 9.97
 25 4 -2 31.53 18.01
 25 4 2 32.55 13.45
 -25 -4 2 40.64 15.5
 -25 4 -2 18.51 12.8
 -25 -4 2 31.02 15.49
 26 4 2 5.43 7.89
 -26 -4 2 15.2 9.44
 26 4 -2 -2.81 10
 -26 -4 -2 5.33 5.8
 26 4 -2 9.84 7.12
 26 -4 -2 -2.61 9.06
 -26 -4 -2 -7.38 10.14
 26 -4 2 2.42 7.24
 -26 4 2 -3.19 6.45
 -26 4 -2 -4.08 10.72
 -26 -4 -2 -13.48 11.29
 26 -4 -2 0.16 2.63
 26 4 2 -2.39 6.94
 26 -4 2 -5.29 8
 -26 -4 2 -2.24 4.2
 26 4 2 -2.31 6.89
 -26 4 2 2.14 2.13
 26 -4 -2 11.81 5.92
 26 4 -2 13.67 15.26
 26 4 2 3.9 6.75
 -26 4 -2 11.33 7.39
 -26 4 -2 10.36 12.62
 -26 4 2 7.82 5.72
 26 4 -2 0.39 3.37
 -26 -4 -2 2.67 2.14
 26 4 -2 -8.8 4.69
 26 4 2 8.47 10.57
 -26 4 2 13.04 10.74
 -26 -4 2 -3.17 6.39
 -26 -4 2 -9.14 9.47
 27 4 2 17.7 6.6
 27 4 2 18.74 8.88
 -27 -4 2 74.54 21.44
 -27 -4 -2 56.35 20.4
 -27 4 2 65.94 19.08
 -27 -4 -2 85.29 24.65
 27 -4 2 24 12.28
 27 -4 -2 20.04 11.81
 27 4 -2 42.95 16.78
 27 4 -2 34.7 13.32
 -27 4 -2 78.39 22.47
 -27 -4 -2 100.84 25.19
 27 -4 -2 20.53 8.23
 27 4 2 43.2 17.82
 27 4 -2 22.78 11.64
 27 4 2 10.46 6.05
 -27 4 2 67.06 18.34
 -27 4 -2 72.16 21.95
 27 -4 -2 19.57 10.87
 27 4 -2 30.78 13.01
 -27 4 2 56.6 17.91
 -27 -4 2 56.35 16.65
 -27 -4 -2 68.19 21.69
 27 4 2 34.09 15.12
 -27 -4 2 58.48 19.52
 -27 -4 2 43.79 17.59
 -28 -4 -2 8.67 11.98
 28 4 2 -11.99 11.85
 28 -4 -2 -0.28 7.97
 28 4 2 -1.22 6.83
 28 -4 2 3.5 6.81
 28 4 -2 2.39 7.65
 28 4 -2 4.25 8.1
 28 -4 -2 -5 9.85
 -28 -4 2 -10.79 6.88
 -28 4 2 1.37 2.48
 28 4 -2 0.7 3.8
 -28 4 -2 23.06 15.12
 -28 -4 2 22.47 10.01
 -28 -4 -2 -15.2 11.69
 28 4 2 10.79 7.37
 28 -4 2 -3.24 11.61
 28 -4 -2 -0.12 9.94
 28 -4 2 -2.91 5.8
 -28 -4 -2 -1.02 2.8
 -28 4 -2 4.13 9.18
 -28 4 2 4.14 5.66
 -28 -4 -2 15.05 9.54
 28 4 2 -3.62 8.23
 -28 -4 2 11.7 9.75
 -28 -4 2 4.2 8.62
 28 4 -2 -17.09 11.96
 -29 -4 2 -35.65 13.18
 -29 -4 -2 0.63 6
 29 -4 -2 -18.66 11.36
 29 4 -2 6.98 7.03
 -29 4 2 2.42 3.25
 29 4 2 -12.21 9.34
 29 -4 -2 1.21 4.77
 29 4 -2 0.71 2.2
 -29 4 -2 -10.92 4.13
 29 -4 -2 0.97 3.45
 29 -4 2 6.62 5.37
 29 -4 2 -1.02 5.38
 -29 -4 -2 -18.23 9.4
 -29 -4 -2 16.73 13.21
 29 4 2 -7.07 6.75
 29 4 -2 2.52 4.73
 29 -4 2 -2.42 2.34
 -29 4 2 5.72 2.35
 -29 -4 2 1.69 6.27
 -29 -4 2 13.04 8.61
 -29 4 -2 -3.99 7.28
 29 4 2 3.49 5.89
 -29 -4 -2 -1.37 5.4
 29 4 -2 4.87 5.36
 -29 -4 2 8.99 8.67
 30 -4 -2 -4.1 5.37
 30 -4 2 3.4 4.67
 -30 -4 -2 -10.07 6.12
 30 4 -2 -1.96 5.26
 -30 -4 -2 -12.77 9.48
 -30 4 -2 -4.81 4.78
 30 -4 -2 -0.19 2.71
 30 4 -2 1.67 5.68
 30 4 2 5.63 6.31
 30 -4 2 9.28 6.78
 -30 -4 2 -5.17 2.45
 -30 4 -2 1.07 3.97
 30 -4 -2 9.17 8.07
 30 -4 2 -7.01 4.21
 30 4 2 -5.01 7.16
 -30 4 2 -1.17 4.88
 30 4 2 -3.45 4.98
 -30 -4 2 4.43 6.28
 0 5 -2 1544.96 118.88
 0 -5 -2 1261.11 108.37
 0 -5 -2 1366.41 112.94
 0 5 2 1382.29 120.52
 0 -5 -2 1382.01 112.85
 0 -5 2 1543.17 133.82
 0 -5 2 1672.88 127.21
 0 5 2 1378.82 113.68
 0 5 -2 1362.42 117.38
 0 5 2 1360.65 115.8
 -1 5 -2 41.15 20.86
 1 5 2 25.23 13.81
 1 -5 2 26.56 16.62
 -1 5 2 31.34 15.15
 -1 5 2 47.88 23.6
 1 5 -2 28.34 15.07
 -1 -5 -2 43.45 20.18
 1 -5 -2 25.93 14.68
 1 5 2 33.45 20.51
 -1 5 2 38.69 18.72
 -1 -5 -2 37.54 21.55
 -1 5 -2 34.58 19.37
 1 -5 -2 48.48 17.89
 1 5 2 42.36 20.34
 -1 -5 2 48.21 22.14
 1 -5 2 39.51 17.42
 -1 5 -2 36.29 22.4
 1 5 -2 31.61 17.82
 1 -5 -2 37.93 19.9
 -1 -5 -2 33.13 16.83
 -1 -5 2 41.95 22.16
 2 -5 2 1684.92 132.14
 -2 -5 2 2083.22 160.17
 -2 5 -2 1784.04 131.9
 2 -5 2 1703.87 116.99
 2 -5 -2 1472.66 118.39
 2 -5 -2 2118.16 122.6
 -2 -5 -2 1755.08 129.63
 2 -5 2 1761.65 128.21
 -2 -5 -2 1691.04 128.43
 -2 5 -2 1903.16 151.28
 -2 -5 -2 1746.13 123.8
 2 5 2 1591.62 127.74
 -2 5 2 1731.61 134.17
 -2 5 2 1616.11 129.68
 2 -5 -2 1440.91 118.67
 -2 -5 2 2256.05 144.67
 -2 5 -2 1738.91 138.48
 2 5 2 2018.28 133.23
 2 5 -2 1610.19 124.19
 2 5 -2 2577.7 113.42
 2 5 2 1870.34 94.6
 2 5 2 1407.11 117.1
 2 5 -2 1864.56 128.17
 -2 5 2 1610.54 128.93
 -3 5 -2 223.44 53.8
 3 -5 2 235.27 48.29
 -3 -5 -2 214.72 45.48
 -3 5 -2 199.23 47.22
 -3 -5 2 257.58 50.32
 -3 -5 -2 252.33 49.77
 3 -5 -2 198.81 42.88
 3 -5 -2 285.95 49.64
 -3 5 -2 219.64 49.92
 -3 5 2 226.4 49.7
 -3 5 2 214.95 47.19
 3 -5 2 226.67 45.98
 -3 5 -2 292.13 60.15
 3 5 -2 275.16 48.07
 3 -5 -2 228.19 50.15
 3 5 -2 342.84 43.35
 3 -5 2 278.1 47.41
 3 5 2 258.42 47.75
 3 5 -2 205.7 44.45
 -3 -5 -2 277.71 49.15
 3 5 2 235.99 36
 3 5 2 208.15 45.54
 3 5 2 191.74 43.37
 -4 -5 -2 417.69 65.52
 4 -5 2 338.2 59.57
 4 5 -2 365.86 58.79
 -4 5 2 357.17 61.65
 -4 5 -2 337.97 61.68
 4 5 -2 573.6 58.86
 4 -5 -2 325.55 57.04
 4 -5 -2 467.85 68.6
 -4 5 -2 477.31 77.6
 -4 -5 -2 378.09 60.56
 4 -5 -2 450.18 72.71
 -4 -5 2 424.56 68.98
 4 -5 2 386.42 52.19
 -4 -5 -2 452.17 62.73
 4 5 2 329.02 56.48
 -4 5 2 379.83 68.69
 4 5 2 414.31 60.28
 -4 5 -2 354.51 68.9
 -4 5 -2 374.6 67.91
 4 5 2 416.81 51.82
 4 5 2 416.21 66.62
 4 -5 2 366.02 60.06
 4 5 -2 450.85 61.68
 -5 5 2 37.03 23.09
 5 -5 2 57.49 24.23
 5 5 2 19.72 10.46
 5 5 2 42.5 17.76
 5 -5 -2 28.82 17.24
 5 5 2 44.17 21.67
 -5 -5 -2 41.66 18.8
 5 -5 -2 20.11 8.54
 5 5 -2 50.62 19.47
 5 -5 -2 29.28 16.86
 -5 5 -2 48.71 23.84
 -5 -5 -2 42.64 21.47
 -5 5 -2 47.9 26.96
 -5 5 -2 22.84 16.22
 -5 -5 -2 38.23 22.63
 5 5 2 28.42 15.67
 -5 5 2 46.87 24.01
 -5 -5 2 48.96 23.24
 -5 5 -2 38.63 23.21
 5 5 -2 36.23 18.89
 5 5 -2 48.38 20.26
 5 -5 2 37.37 19.22
 6 5 -2 16.91 11.54
 6 -5 2 14.95 11.74
 6 -5 -2 -0.1 17.46
 -6 5 -2 -8.96 13.52
 6 5 2 1.46 12.9
 -6 -5 2 15.4 13.17
 -6 -5 -2 5.32 3.26
 -6 -5 -2 9.66 12.83
 -6 -5 -2 10.7 10.17
 6 5 2 4.28 6.8
 6 -5 -2 1.23 9.13
 6 5 2 7.47 2.75
 -6 5 2 2.2 4.29
 -6 5 2 0.17 2.97
 -6 5 -2 13.03 14.58
 6 5 -2 12.35 12.17
 6 5 2 27.32 15.28
 6 5 -2 1.28 4.41
 -6 5 -2 -3.59 9.57
 6 -5 2 16.55 8.74
 -7 -5 -2 5.39 8.8
 -7 -5 -2 17.36 14.52
 7 -5 2 5.01 8.23
 7 5 -2 13.66 10
 7 -5 -2 -1.69 13.7
 -7 -5 -2 14.13 9.27
 -7 5 -2 0.55 9.73
 -7 5 -2 11.07 11.75
 -7 -5 2 21.38 15.83
 -7 5 -2 -13.8 15.24
 -7 -5 2 4.98 7.58
 7 5 2 12.61 16.56
 -7 5 2 3.89 9.07
 7 -5 -2 13.6 12.72
 -7 5 2 8.23 5.61
 7 5 2 11.31 11.03
 7 5 -2 14.76 9.28
 7 5 2 13.24 9.24
 7 5 -2 15.7 14.54
 7 -5 2 2.57 7.35
 -8 -5 -2 605.03 88.17
 8 -5 -2 547.04 93.01
 -8 -5 -2 646.69 78.66
 -8 5 -2 592.8 91.42
 -8 5 2 575.41 85.11
 -8 5 -2 424.68 78.23
 8 -5 2 627.01 78.03
 -8 -5 2 812.97 81.73
 8 -5 -2 471.88 82.65
 -8 -5 2 593.39 80.72
 8 5 2 534.46 78.92
 -8 -5 -2 641.41 86.98
 -8 5 -2 304.74 63.41
 -8 5 2 545.7 86.83
 8 5 -2 638.18 79.93
 8 5 -2 746.2 81.09
 8 5 -2 791.94 83.55
 8 -5 2 568.17 75.72
 8 -5 2 444.44 70.82
 8 5 2 377.63 67.1
 9 5 -2 4.26 10.33
 9 -5 2 14.49 9.57
 -9 -5 -2 4.64 5.49
 9 5 2 13.6 10.83
 9 -5 -2 1.71 9.11
 -9 5 -2 5.92 13.19
 -9 -5 -2 6.36 10.7
 9 -5 -2 3.55 5.59
 -9 -5 2 7.83 13.78
 9 -5 2 -1.92 12.07
 -9 -5 -2 -23.63 16.54
 -9 -5 2 6.02 5.59
 9 5 2 8.12 7.01
 -9 5 2 -4.56 9.25
 -9 5 2 4.59 11.6
 9 5 -2 23.35 14.96
 -9 5 -2 1.27 5.12
 9 5 -2 2.86 6
 9 -5 2 7.61 11.53
 10 -5 2 997.31 100.2
 -10 -5 -2 948.8 119.62
 -10 -5 -2 888.58 104.16
 10 -5 -2 965.04 136.26
 -10 -5 -2 1030.21 105.89
 -10 -5 2 1375.59 112.27
 10 5 -2 1023.31 104.33
 -10 5 -2 959.32 122.25
 -10 5 -2 731.7 107.53
 10 5 2 714.74 93.14
 -10 5 2 844.09 93.2
 10 -5 -2 965.77 129.73
 -10 -5 2 1146.67 118.06
 -10 5 2 948.34 121.35
 -10 5 2 1019.45 118.79
 10 -5 2 765.76 99.37
 10 5 -2 1116.28 108.09
 10 5 -2 1340.37 111.1
 10 -5 2 949.91 100
 11 -5 2 48.54 24.3
 11 5 2 28.19 15.33
 -11 5 -2 13.82 11.69
 11 -5 -2 26.6 26.09
 11 -5 -2 27.08 23.94
 -11 -5 -2 31.19 17.45
 -11 -5 -2 29.53 16.69
 -11 5 2 40.33 27.47
 11 5 -2 47.63 24.42
 -11 -5 -2 35.14 20.04
 -11 5 2 38.82 22.91
 -11 -5 2 59.95 27.28
 -11 5 -2 49.7 28.81
 11 5 -2 61.63 23.68
 11 5 -2 50.08 22.44
 -11 -5 2 78.96 29.89
 -11 5 2 32.55 19.04
 -12 -5 -2 301.36 71.04
 -12 -5 2 542.95 76.2
 -12 -5 -2 342.74 68.63
 -12 -5 2 478.11 80.06
 12 -5 -2 248.46 73.86
 -12 5 2 287.94 60
 -12 5 -2 399.74 82.42
 12 -5 -2 359.64 80.54
 -12 5 -2 298.76 69.19
 12 5 -2 466.41 74.91
 -12 5 2 380.2 82.25
 12 5 -2 443.87 73.79
 12 5 2 259.9 60.38
 12 -5 2 353.79 72.64
 -13 5 2 41.41 19.94
 -13 5 -2 42.19 27.64
 13 -5 2 15.33 12.97
 13 5 2 22.09 15.45
 -13 -5 2 79.4 28.88
 -13 5 -2 71.58 36.06
 -13 -5 -2 62.2 29.13
 13 5 -2 42.27 23.98
 -13 -5 -2 41.85 25.8
 13 -5 -2 71.05 37.91
 13 5 -2 51.41 25.36
 -13 5 2 28.24 18.18
 -13 -5 2 59.89 24.97
 13 -5 -2 47.5 34.91
 -14 5 2 599.36 93.77
 -14 -5 -2 800.25 124.64
 14 -5 2 487.97 99.09
 -14 -5 -2 738.59 105.35
 -14 5 -2 734.03 114.58
 -14 -5 2 1043.41 114.01
 -14 5 -2 361.81 53.81
 -14 5 -2 905.99 130.58
 14 -5 -2 628.14 125.7
 14 -5 -2 852.53 134.04
 -14 -5 2 879.39 111.72
 14 5 2 677.84 67.39
 -14 5 2 607.91 106.89
 14 5 -2 875.48 106.19
 -14 5 2 757.69 70.33
 14 5 -2 903.64 112.61
 14 -5 2 616.35 102.8
 14 5 2 612.64 100.92
 14 5 2 701.17 71.35
 15 -5 2 12.35 16.69
 15 5 2 40.95 17.3
 -15 5 2 34.62 14.53
 -15 -5 2 53.13 15.68
 15 -5 2 0.39 11.83
 -15 5 2 26.86 13.79
 -15 5 2 34.56 13.74
 -15 5 -2 23.06 16.03
 -15 -5 -2 21.85 13.1
 -15 5 -2 1.38 6.63
 -15 -5 -2 24.52 15.63
 -15 -5 -2 13.36 20.43
 15 5 2 25.66 18.67
 15 5 -2 35.63 20.1
 -15 -5 -2 27.79 10.93
 15 -5 -2 22.29 29.59
 -15 5 -2 24.92 16.54
 15 5 -2 36.23 15.06
 15 5 -2 24.68 12.16
 -15 -5 -2 29.8 24.35
 15 -5 -2 52.56 34.42
 -15 5 -2 16.22 13.86
 -15 -5 2 29.47 13.54
 15 5 2 18.99 8.36
 -15 5 -2 14.9 10.93
 15 5 2 10.08 9.88
 15 5 2 -14.76 15.77
 15 5 -2 28.4 16.93
 15 5 2 -14.45 19.47
 -15 5 2 12.36 10.1
 -15 -5 2 35.18 20.84
 15 5 2 11.73 17.13
 -15 5 -2 28.74 22.19
 -15 5 -2 17.06 12.42
 -15 5 2 34.51 16.55
 -15 5 -2 28.53 14.36
 15 5 -2 30.9 14.23
 -15 5 2 17.79 11.39
 -15 5 -2 -8.11 7.95
 15 5 -2 32.73 11.86
 -15 -5 -2 33.28 15.27
 15 5 -2 38.84 16.21
 15 5 2 27.31 12.02
 -15 5 2 22.97 11.93
 -15 -5 2 31.08 13.82
 15 5 -2 42.37 16.93
 16 5 2 82.17 24.67
 -16 -5 2 132.85 27.66
 16 -5 2 92.55 40.07
 16 5 -2 161.04 51.44
 -16 5 2 129.16 30.4
 -16 -5 -2 54.45 20.79
 16 5 2 102.63 33.86
 -16 -5 -2 95.18 25.15
 16 -5 -2 75.04 41.76
 16 5 2 104.81 32.05
 16 5 2 143.26 36.52
 16 -5 -2 77.24 43.99
 16 5 2 61.7 20.48
 16 5 -2 136.51 29.89
 16 -5 2 16.95 20.43
 -16 5 -2 149.2 56.87
 -16 -5 -2 80.43 24.04
 16 5 2 117.86 29.14
 16 5 -2 146.34 30.37
 16 5 -2 145.88 29.68
 -16 -5 -2 138.9 48.45
 16 5 2 77.98 26.28
 -16 5 -2 103.4 27.34
 16 5 -2 162.88 31.47
 -16 -5 2 138.71 41.72
 16 5 -2 221.12 49.75
 -16 5 -2 106.29 25.02
 16 5 2 109.29 32.63
 -16 5 -2 42.79 22.97
 -16 5 2 166.68 42.23
 -16 5 -2 97.03 30.47
 -16 5 -2 73.14 25.31
 -16 5 2 112.94 27.29
 -16 -5 -2 137.54 30.35
 -16 5 -2 86.67 25.73
 16 5 -2 155.38 48.04
 -16 5 -2 101.85 26.12
 -16 -5 -2 86.23 23.37
 16 5 2 90.49 24.31
 -16 5 2 122.17 29.67
 -16 -5 2 131.2 28.17
 -16 5 2 107.32 27.53
 16 5 -2 150.05 35.28
 -17 -5 2 81.38 22.37
 -17 5 2 64.74 21.58
 17 5 2 54.25 19.08
 17 5 -2 113.68 26.57
 -17 5 -2 79.69 22.14
 -17 -5 -2 71.57 22.95
 -17 5 -2 67.32 23.32
 -17 5 -2 85.19 22.28
 -17 5 2 146.54 40.04
 -17 5 -2 84.7 25.88
 17 5 2 88.38 27.68
 -17 -5 -2 94.16 26.86
 17 5 -2 107.75 26.13
 17 -5 -2 56.01 20.51
 17 5 2 84.59 30.84
 17 5 2 97.68 35.65
 17 5 -2 101.5 25.53
 -17 5 2 64.52 20.16
 17 -5 -2 94.56 39.72
 17 5 -2 144.44 38.14
 -17 -5 2 107.4 42.43
 -17 5 -2 45.09 22.01
 -17 5 -2 82.37 28.43
 -17 5 2 73.53 23.24
 -17 -5 -2 80.76 23.71
 17 5 -2 118.99 29.85
 -17 -5 -2 63.88 23.01
 17 5 2 74.68 23.65
 -17 5 2 84.06 24.11
 -17 -5 2 88.32 24.3
 17 5 2 57.66 23.19
 18 5 2 63.83 25.65
 -18 5 2 59.69 20.82
 -18 -5 -2 25.88 15.1
 -18 -5 -2 39.69 20.14
 -18 5 -2 55.35 19.49
 -18 5 -2 38.88 15.99
 -18 5 -2 50.97 20.48
 -18 -5 -2 42.83 20.35
 18 5 -2 56.32 18.63
 18 5 2 50.85 19.94
 18 5 -2 63.98 20.48
 18 -5 -2 22.96 11.18
 18 5 2 22.84 3.64
 18 5 -2 71.59 28.78
 18 5 2 38.69 19.43
 -18 5 2 61.24 21.37
 -18 5 -2 28.21 15.21
 -18 5 -2 55.69 20
 -18 5 -2 37.96 18.08
 18 5 2 42.61 18.43
 -18 5 2 55.22 20.25
 18 5 -2 58.37 19.55
 -18 -5 2 34.64 15.31
 -18 -5 2 80 22.67
 18 5 -2 73.13 23.56
 -18 -5 -2 36.74 18.34
 18 5 2 39.55 19.48
 -18 5 2 58.91 20.22
 -18 -5 2 53.48 19.67
 -19 5 2 29.09 14.27
 19 5 -2 43.42 23.57
 -19 -5 2 32.19 16.22
 -19 5 -2 18.87 10.52
 -19 -5 -2 35.45 18.34
 -19 5 -2 27.2 15.35
 -19 -5 2 20.9 11.89
 -19 5 -2 29.47 12.88
 -19 -5 -2 20.35 13.75
 19 -5 -2 18.08 10.28
 19 5 2 27.17 17.83
 19 5 -2 40.76 15.94
 19 5 2 43.97 19.29
 -19 5 -2 14.11 10.04
 19 5 2 30.22 21.45
 19 5 -2 33.07 16.62
 19 5 -2 32.26 14.12
 -19 5 -2 19.36 15
 19 5 -2 23.62 12.08
 19 5 2 25.56 12.41
 -19 -5 2 36.04 14.93
 -19 -5 -2 35.75 15.18
 -19 5 -2 24.26 13.32
 -19 5 2 37.34 15.7
 -19 -5 2 53.32 18.39
 -19 -5 -2 32.42 16.77
 19 5 2 18.69 9.06
 -19 5 2 28.72 13.59
 -19 5 2 19.97 6.57
 -20 -5 2 9.41 9.97
 -20 5 2 9.53 7.75
 -20 5 -2 17.69 12.68
 -20 -5 -2 6.75 7.99
 20 5 -2 6.49 6.75
 20 5 2 8.93 7.98
 -20 -5 2 14.95 11.09
 20 5 2 17.68 10.58
 -20 -5 -2 7.95 10.1
 -20 5 -2 0.87 4.01
 -20 5 2 11.71 9.63
 20 5 -2 14.44 8.84
 20 -5 -2 5.1 3.8
 -20 -5 -2 25.84 15.46
 -20 5 -2 7.68 5.34
 -20 5 -2 -2.74 3.27
 20 5 -2 6.9 7.71
 20 5 2 5.93 4.59
 20 5 -2 33.74 20.93
 -20 5 -2 15.1 11.43
 -20 5 2 17.69 13.58
 20 5 2 1.02 7.22
 -20 -5 2 14.03 16.43
 -20 5 2 14.46 11.25
 -20 5 -2 3.71 4.53
 -20 -5 2 24.21 10.99
 -20 -5 -2 5.96 9.79
 20 5 -2 13.58 10.01
 20 5 2 18.79 10.89
 -20 -5 2 15.34 9.94
 -20 -5 -2 8.87 9.8
 21 5 2 1.67 3.1
 -21 -5 2 -5.9 5.56
 -21 5 -2 -2.8 5.26
 -21 5 2 9.62 9.87
 -21 -5 -2 1.55 5.44
 21 5 -2 6.31 6.79
 -21 -5 -2 -5.85 7.45
 -21 5 -2 4.89 11.36
 -21 -5 -2 11.71 11.91
 21 -5 -2 10.39 14.18
 21 5 -2 -1.74 12.4
 -21 5 -2 3.13 7.95
 21 5 -2 -2.19 10.07
 21 5 2 2.22 8.22
 21 5 -2 2.04 5.29
 21 5 2 6.99 5.09
 21 5 2 -11.05 17.33
 -21 5 2 3.63 4.11
 21 -5 2 10.49 4.2
 -21 -5 -2 7.04 3.48
 -21 5 -2 6.36 5.04
 21 5 2 16.64 14.64
 -21 5 -2 -5.95 12.87
 -21 -5 2 8.16 6.13
 -21 -5 -2 -1.26 5.3
 21 5 -2 0.75 8.79
 -21 -5 2 0.38 4.41
 -21 5 2 5.43 10.01
 -21 5 2 8.28 7.96
 -21 -5 2 6.86 9.18
 -22 -5 2 3.01 7.76
 22 5 2 39.28 20.17
 -22 5 -2 22.75 13.68
 -22 -5 -2 8.32 7.07
 -22 5 2 9.31 8.99
 -22 -5 -2 22.82 13.95
 -22 -5 -2 11.35 9.86
 -22 5 2 21.05 11.4
 -22 5 -2 16.18 10.88
 22 5 -2 17.77 11.83
 22 5 -2 24.6 13.37
 22 -5 -2 5.76 7.04
 22 5 2 20.77 12.81
 -22 -5 2 10.61 11.31
 -22 5 -2 10.09 10.65
 22 5 -2 6.69 3.05
 -22 5 2 11.88 8
 -22 -5 -2 8.97 10.54
 22 5 -2 15.01 13.78
 22 5 2 1.15 4.96
 22 5 2 9.2 7.98
 -22 5 -2 7.97 3.49
 -22 -5 2 20.24 8.04
 22 5 -2 12.61 9.74
 22 5 2 10.27 9.68
 22 -5 2 17.83 15.62
 -22 5 2 26.07 13.84
 -22 -5 2 20.56 11.84
 -22 -5 -2 4.69 5.26
 23 5 2 25.85 9.7
 -23 5 2 14.27 7.09
 -23 -5 -2 6.73 6.76
 23 5 -2 32.38 16.87
 -23 5 -2 8.21 7.52
 -23 -5 2 26.96 12.94
 -23 -5 -2 17.3 10.27
 -23 -5 2 4.61 2.76
 23 5 -2 13.34 9.46
 -23 5 -2 7.25 7.54
 -23 5 2 24.73 11.76
 23 5 -2 26.3 14.05
 23 -5 -2 -1.82 13.57
 23 5 2 -1.57 8.49
 -23 5 -2 13.92 15.21
 23 5 -2 14.29 10.5
 23 5 2 8.45 4.07
 -23 -5 -2 15.73 11.38
 23 5 -2 19.37 17.11
 -23 5 2 15.29 8.46
 -23 -5 2 21.35 12.41
 -23 5 -2 21.21 13.59
 23 -5 2 5.57 5.48
 -23 -5 -2 12.45 9.75
 23 5 2 3.74 7.91
 23 5 2 -0.33 12.24
 -23 -5 2 6.04 6.5
 -23 5 2 20.19 12.47
 -23 -5 2 12.52 7.09
 -24 -5 2 72.25 22.05
 24 5 2 71.49 25.12
 -24 -5 -2 112.97 29.1
 -24 5 2 52.45 18.85
 -24 -5 2 111.43 28.11
 -24 -5 -2 66.36 21.91
 -24 -5 2 62.17 20.85
 -24 5 2 118.41 29.75
 -24 -5 -2 116.02 28.32
 -24 5 -2 54.42 21.24
 24 5 -2 108.67 35.68
 24 5 2 37.31 20.08
 -24 5 -2 80.34 23.97
 24 5 2 65.26 24.57
 -24 -5 -2 60.46 19.48
 24 -5 2 19.95 9.88
 24 5 -2 56.71 19.95
 24 -5 -2 56.69 22.13
 24 5 2 57.26 20.56
 -24 5 -2 76.16 27.02
 24 5 -2 79.76 25.32
 24 5 -2 72.62 24.06
 -24 5 2 75.75 23.7
 24 5 2 69.64 21.94
 -24 -5 2 109.45 26.18
 -24 5 -2 75.36 24.79
 24 5 -2 98.57 30.1
 -24 -5 2 69.34 22.06
 -24 5 2 100.73 27.88
 -25 -5 -2 31.71 14.8
 -25 5 -2 38.47 15.34
 -25 -5 -2 56.43 20.43
 25 5 2 38.81 15.51
 25 5 -2 37.36 16.34
 25 5 2 15.48 9.43
 25 5 -2 25.15 11.43
 25 5 2 40.78 18.52
 25 -5 -2 4.82 7.07
 25 5 2 26.44 16.03
 -25 -5 2 35.52 15.25
 25 -5 2 5.86 4.63
 -25 -5 -2 37.42 14.85
 25 5 -2 20.5 10.42
 -25 5 2 57.24 18.07
 25 5 -2 35.64 23.58
 25 5 -2 28.34 14.31
 25 -5 -2 9.33 7.78
 -25 5 2 50.47 21.1
 -25 5 2 25.49 8.18
 -25 -5 2 36.01 11.31
 -25 5 -2 35.54 17.31
 -25 -5 -2 43.6 18.64
 25 5 2 30.77 15.96
 -25 -5 2 30.72 14.02
 -25 5 2 50.08 18.59
 -25 -5 2 38.25 17.2
 -25 -5 2 39.28 13.4
 26 5 2 99.07 26.98
 -26 -5 -2 119.89 30.87
 -26 -5 2 121.84 27.33
 -26 -5 2 147.88 31.49
 -26 -5 -2 193.03 35.82
 -26 5 -2 135 29.88
 26 5 2 58.13 22.43
 26 5 2 108.04 26.63
 26 5 2 89.42 24.19
 -26 -5 -2 147.03 29.77
 -26 -5 2 125.78 29.18
 26 -5 -2 57.6 16.39
 26 -5 -2 56.3 21.61
 -26 -5 -2 156.02 35.06
 -26 5 -2 164.97 33.38
 -26 5 2 156.62 30.63
 -26 5 2 192.36 41.73
 26 5 -2 94.23 24.71
 26 -5 2 46.91 16.32
 26 5 -2 116.6 28.97
 26 -5 -2 93.49 27.05
 -26 5 2 124.21 26.76
 26 5 2 109.2 28.64
 -26 -5 2 131.02 26.1
 26 5 -2 116.22 30.45
 -26 5 2 150.6 30.74
 26 5 -2 114.11 27.06
 27 -5 2 17.66 9.17
 -27 -5 -2 23.51 10.77
 27 -5 -2 19.39 13.89
 -27 -5 2 33.95 15.46
 -27 5 -2 42.23 16.61
 -27 -5 -2 50.79 16.59
 -27 5 -2 33.02 11.94
 27 5 -2 6.03 5.19
 27 5 -2 35.17 14.16
 27 5 2 27.23 12.57
 27 -5 -2 3.5 4.86
 -27 -5 -2 11.01 4.33
 27 5 2 33.74 13.89
 27 5 -2 22.03 12.95
 27 5 2 13.62 12.97
 27 -5 -2 7.79 7.03
 -27 5 2 32.19 14.06
 -27 5 2 36.76 15.29
 -27 -5 2 7.89 4.18
 27 5 -2 23.56 13.72
 27 5 2 23.91 13.57
 -27 -5 -2 32.26 14.01
 -27 -5 2 33.17 13.81
 27 5 2 21.74 10.46
 28 -5 2 17.3 9.51
 28 5 -2 6.34 5.31
 -28 -5 -2 14.47 10.34
 -28 5 -2 10.27 2.07
 -28 5 -2 23.6 8.88
 28 5 2 26.59 12.56
 28 -5 -2 7.21 7.78
 28 5 2 -1.27 6.48
 28 5 2 10.69 7.7
 -28 -5 2 12.82 7.39
 -28 -5 -2 21.16 10.9
 28 5 -2 13.28 9.29
 28 -5 -2 -0.08 1.9
 28 -5 2 -2.67 6.74
 28 -5 2 3.67 5.11
 28 -5 -2 1.96 2.16
 -28 5 2 13.2 6.13
 28 5 -2 7.31 7.29
 -28 -5 -2 18.18 9.11
 -28 -5 2 11.05 8.63
 -28 5 2 22.76 9.57
 -28 -5 -2 24.88 12.77
 28 5 -2 0.3 3.79
 28 5 2 13.98 6.22
 -28 -5 2 15.18 7.86
 28 5 2 17.38 8.3
 29 5 2 0.42 4.61
 29 -5 -2 6.85 7.31
 -29 -5 2 4.98 1.66
 29 -5 2 -10.52 9.98
 29 5 2 17.34 11.51
 29 -5 -2 -3.63 6.69
 -29 5 -2 4.66 3.3
 -29 5 2 -3.69 7.99
 29 5 -2 -12.09 7.42
 29 5 -2 -5.75 7.02
 -29 -5 2 10.36 7.15
 29 5 -2 1.68 2.78
 29 -5 2 3.03 4.79
 -29 5 2 9 3.81
 29 -5 -2 14.64 8.06
 29 -5 2 13.18 8.25
 -29 -5 -2 1.27 5.94
 -29 -5 -2 -8.08 8.73
 -29 -5 2 -1.6 1.78
 -29 -5 -2 3.67 4.05
 29 5 -2 8.33 4.03
 29 5 2 0.31 4.77
 -30 -5 2 10.63 6.87
 -30 -5 -2 0.49 2.36
 30 5 2 -0.49 8.78
 30 -5 -2 8.7 7.49
 -30 5 -2 -4.26 3.64
 30 5 2 -0.42 3.16
 0 -6 2 297.08 63.8
 0 -6 2 252.19 53.21
 0 6 2 235.16 50.77
 0 6 -2 202.27 49.86
 0 -6 -2 272.1 55.53
 0 6 2 203.79 49.38
 0 6 -2 246.31 52.99
 0 -6 -2 242.3 50.14
 0 6 2 233.76 50.66
 0 -6 -2 309.91 56.33
 1 -6 2 14.41 13.3
 -1 6 2 2.78 8.06
 -1 6 2 7.16 16.08
 1 6 2 4.67 9.67
 1 -6 -2 8.37 10.63
 -1 6 -2 20.21 15.36
 1 6 -2 6.63 9.07
 -1 -6 -2 13.52 13.75
 -1 -6 -2 -1.52 10.47
 1 -6 -2 14.31 5.19
 -1 -6 -2 8.73 8.3
 1 -6 2 4.35 8.29
 1 6 2 11.91 13.77
 1 6 2 4.2 9.85
 -1 6 2 12.3 7.75
 -1 -6 2 7.9 11.31
 -1 -6 2 13.06 8.2
 -1 6 -2 35.4 23.23
 1 6 -2 7.8 7.37
 1 -6 -2 15.38 13.34
 2 6 -2 658.99 82.98
 2 -6 2 723.71 94.14
 -2 -6 2 916.11 117.08
 2 -6 -2 728.5 90.02
 2 -6 -2 747.44 87.67
 -2 -6 -2 629.69 85.08
 -2 -6 -2 637.59 83.8
 -2 6 2 620.98 88.74
 -2 -6 -2 784.41 88.85
 -2 6 2 655.82 89.75
 -2 -6 2 661.9 95.68
 -2 6 -2 781.88 104.68
 -2 6 -2 572.46 82.55
 2 6 2 691.5 86.56
 2 -6 2 680 85.68
 -2 6 -2 695.58 95.35
 2 6 -2 663.35 86.81
 2 6 2 603.36 86.93
 2 -6 2 758.84 89.54
 2 6 2 529.45 77.49
 -2 6 2 597.1 83.81
 3 -6 2 26.66 18.03
 -3 6 -2 -6.41 19.79
 3 -6 2 6.83 5.82
 -3 6 2 12.34 11.74
 3 6 -2 11.5 13.86
 3 6 2 11.75 3.24
 3 6 2 34.38 16.95
 -3 -6 -2 36.73 19.66
 3 6 2 20.42 17.53
 -3 -6 -2 15.93 17.46
 -3 6 -2 25.56 17.98
 3 -6 -2 42.7 21.97
 -3 6 2 19.98 19.86
 3 -6 -2 18.91 18.15
 -3 -6 2 27.77 19.95
 3 -6 2 23.73 14.31
 -3 6 -2 18.49 17.7
 -3 -6 -2 18.97 12.22
 3 6 -2 20.69 16.34
 4 6 -2 274.22 53.36
 -4 -6 -2 237.05 52.99
 4 -6 2 263.28 55.42
 4 -6 -2 299.68 57.93
 4 -6 -2 210.1 45.83
 4 6 2 229.47 54.19
 -4 6 2 257.58 58.78
 -4 6 -2 170.97 43.87
 4 -6 2 224.31 45.72
 -4 6 -2 310.02 68.97
 -4 -6 -2 269.37 52.46
 4 -6 -2 235.93 53.01
 -4 -6 2 330.43 62.52
 -4 6 -2 201.86 55.96
 -4 6 2 242.48 55.9
 4 6 2 287.08 54.6
 -4 6 -2 285.66 62.96
 4 6 -2 217.53 50.16
 4 6 2 296.61 45.57
 -4 -6 -2 306.35 58.99
 4 6 2 199.17 47.75
 4 6 -2 387.71 53.02
 4 -6 2 307.71 54.75
 -5 6 -2 -28.91 19.27
 5 6 -2 4.81 3.34
 -5 6 2 6.25 10.44
 -5 6 -2 2.01 15.91
 5 -6 2 7.54 8.54
 -5 -6 -2 -0.26 4.38
 5 -6 -2 3.51 11.99
 -5 -6 -2 -2.98 12.69
 5 6 -2 -0.71 7.69
 5 6 2 -8.91 13.41
 5 -6 -2 0.06 10.27
 -5 6 -2 1.97 7.92
 -5 -6 -2 8.72 2.95
 -5 6 -2 8.46 12.35
 5 -6 -2 -44.1 23.37
 5 6 2 8.92 13.3
 -5 6 2 4.96 6.63
 5 6 2 27.45 17
 -5 -6 2 9.25 11.46
 5 6 -2 8.93 4.85
 5 6 2 -23.48 13.21
 5 -6 2 0.9 11.36
 6 6 -2 32.98 14.57
 6 6 2 29.17 18.55
 6 -6 -2 41.62 24.24
 6 -6 2 23.42 14
 6 6 -2 24.09 16.61
 -6 6 2 28 24.01
 -6 -6 -2 33.56 16.93
 -6 -6 -2 52.9 24.68
 6 -6 -2 28.76 14.71
 -6 6 -2 34.64 24.13
 -6 6 -2 15.01 18.49
 -6 -6 -2 34.13 21.28
 6 -6 -2 25.27 14.65
 -6 6 2 30.65 19.05
 6 6 2 39.14 18.52
 -6 6 -2 36.58 19.45
 6 6 2 27.32 19.25
 -6 -6 2 27.02 19.01
 -6 6 -2 7.19 7.51
 6 6 -2 17.89 11.82
 6 6 2 29.07 13.58
 6 -6 2 47.87 22.6
 7 6 2 60.67 24.95
 7 6 -2 61.36 23.02
 7 -6 2 78.43 29.51
 7 6 -2 56.8 24.98
 -7 6 2 67.07 29.66
 -7 6 -2 36.93 23.29
 -7 -6 2 68.31 30.32
 7 6 2 42.6 19.89
 -7 -6 -2 74.95 32.76
 7 -6 2 85.84 31.96
 7 -6 -2 57.77 27.67
 7 -6 -2 75.18 36.43
 -7 -6 -2 65.63 24.77
 7 6 2 36.71 24.4
 -7 -6 -2 63.9 29.75
 7 -6 -2 70.66 32.21
 -7 6 -2 73.86 33.39
 -7 6 2 79.33 34.4
 -7 6 -2 11.5 10.71
 7 6 -2 44.53 19.44
 -8 -6 2 92.31 36.58
 8 6 -2 69.94 25.45
 8 -6 2 66.21 28.07
 8 6 -2 92.64 31.6
 -8 -6 -2 61.82 25.44
 8 -6 2 89.42 31.55
 8 -6 -2 62.5 28.44
 -8 6 2 41.76 23.26
 8 6 2 48.3 23.42
 -8 6 -2 58.46 31.78
 8 -6 -2 108.62 47.06
 -8 6 -2 81.03 35.33
 -8 -6 -2 63.72 29.84
 -8 6 2 79.87 35.34
 8 6 2 68.26 28.46
 8 6 -2 53.37 25.09
 8 6 2 67.17 24.85
 -8 -6 -2 75.62 26.89
 8 -6 2 87.11 28.9
 -9 6 -2 22.77 19.37
 9 6 -2 34.35 16.52
 9 6 -2 27.31 19.18
 9 -6 2 27.38 13.94
 9 -6 -2 11.87 19.53
 9 6 2 -5.03 16.99
 -9 -6 -2 29.74 22.15
 -9 -6 -2 23.46 15.74
 9 -6 2 -2.1 19.27
 9 -6 -2 24.61 19.78
 -9 -6 -2 24.46 20.38
 -9 6 -2 14.04 15.42
 9 6 2 0.03 16.38
 -9 6 2 13.38 15.43
 -9 -6 2 13.72 13.64
 9 6 -2 19.33 10.95
 -9 6 2 18.65 10.57
 9 -6 2 8.87 5.94
 10 6 -2 335.8 63.16
 -10 -6 -2 335.59 73.8
 10 6 2 216.09 53.42
 10 -6 -2 289.42 74.87
 -10 6 -2 369.01 82.06
 10 6 -2 423.48 70.4
 -10 6 2 352.39 75.69
 10 -6 -2 370.62 82.36
 -10 -6 2 375.16 72.91
 -10 6 -2 291.62 69.2
 -10 6 2 246.1 66.54
 10 6 2 308.55 61.83
 10 -6 2 320.88 66.3
 -10 -6 -2 378.01 73.18
 10 6 -2 508.13 74.39
 11 6 -2 108.35 36.71
 11 -6 2 63.78 29.93
 11 6 2 70.09 31.97
 11 6 2 36.28 19.55
 -11 6 -2 61.84 32.41
 -11 6 -2 55.14 30.21
 -11 6 2 65.48 36.04
 11 6 -2 78.55 29.33
 11 -6 -2 66.2 39.74
 11 -6 -2 80.49 39.07
 -11 -6 2 66.87 28.39
 -11 -6 -2 58.07 29.28
 -11 6 2 110.88 47.28
 -11 -6 -2 56.46 34.56
 -11 -6 -2 85.05 37.37
 -12 -6 -2 669.23 111.01
 12 -6 -2 567.55 113.01
 -12 -6 2 948.45 118.92
 -12 6 -2 828.35 125.97
 -12 -6 -2 704.02 105
 12 6 -2 762.81 101.71
 12 -6 -2 743.13 125.11
 12 6 2 460.91 83.79
 -12 6 -2 568.98 102.01
 -12 6 2 621.01 110.05
 12 6 2 647.94 96.39
 12 6 -2 915.89 108.66
 12 -6 2 539.87 90.52
 -13 -6 2 14.66 5.87
 -13 -6 -2 -14.46 16.82
 13 6 2 21.64 10.65
 13 6 2 22.01 18.45
 -13 6 -2 23.33 13.27
 13 6 2 25.51 13.25
 13 6 2 20.42 11.96
 -13 -6 2 28.65 22.2
 -13 -6 -2 9.98 5.13
 13 6 2 30.6 15.48
 13 6 -2 -6.39 31.11
 -13 6 -2 14.05 8.09
 -13 6 2 15.11 7.29
 13 6 2 19.65 15.09
 -13 6 -2 6.75 7.49
 13 6 -2 17.2 9.45
 -13 -6 -2 19.92 16.78
 13 6 -2 43.42 20.87
 -13 6 2 34.12 27.53
 13 -6 2 -1.14 13
 13 6 -2 26.11 12.74
 -13 6 2 37.21 18.61
 -13 6 -2 17.2 17.05
 -13 6 2 18.1 11.46
 13 6 -2 24.76 11.39
 13 -6 -2 29.01 18.47
 -13 6 -2 10.48 7.44
 13 -6 -2 28.64 18.1
 -13 6 2 7.34 5.71
 13 6 -2 34.05 16.48
 14 6 -2 665.17 63.59
 -14 -6 -2 534.95 94.5
 -14 6 -2 571.99 108.27
 14 6 2 572.34 72.42
 -14 -6 2 572.39 56.96
 14 -6 2 232.96 65.05
 -14 6 -2 292.17 49.54
 -14 6 -2 474.61 53.74
 -14 6 -2 455.36 53.36
 14 6 2 528.35 68.46
 -14 -6 -2 531.13 55.77
 14 6 2 508.88 71.9
 -14 -6 -2 389.84 85.78
 14 -6 -2 422.06 100.89
 -14 6 -2 404.72 86.45
 14 6 -2 679.19 100.97
 -14 -6 -2 455.94 53.13
 14 6 -2 617.89 57.93
 14 6 -2 615.68 63.54
 14 6 2 484.44 57.77
 -14 6 2 443.31 50.14
 14 -6 -2 624.9 115.94
 -14 6 2 498.05 57.86
 -14 6 2 546.84 59.78
 -14 6 -2 604.87 81.17
 14 6 -2 872.33 91.59
 14 6 2 471.66 71.71
 -14 6 2 454.36 94.2
 -14 6 -2 442.38 58.26
 -14 6 2 764.22 92.88
 14 6 -2 572.87 90.81
 14 6 -2 656.92 61.75
 14 6 2 434.12 84.37
 14 6 -2 668.31 65.32
 14 6 2 345.1 47.99
 14 -6 2 540.48 95.19
 -14 -6 2 708.96 105.6
 -14 6 2 512.2 59.09
 -14 -6 2 629.79 62.15
 14 6 -2 715.82 73.35
 14 6 2 468.62 61.24
 15 6 2 18.47 11.87
 15 -6 2 -10.61 14.13
 -15 6 -2 17.07 9.76
 -15 -6 -2 25.82 14.46
 15 6 -2 14.88 8.97
 -15 -6 -2 17.29 12.3
 -15 -6 -2 48.19 33.72
 15 6 2 23.56 16.13
 -15 6 -2 23.24 15.72
 15 -6 2 -7.6 14.1
 -15 6 2 30.95 16.12
 -15 -6 -2 -0.18 10.67
 -15 6 -2 5.53 6.52
 -15 6 -2 -13.03 16.76
 15 6 2 18.11 9.98
 15 6 -2 17.81 7.1
 -15 6 2 29 13.31
 -15 6 -2 13.99 9.01
 15 6 -2 22.25 10.86
 -15 -6 2 29.33 10.22
 15 6 2 3.82 7.08
 15 6 -2 20.07 10.97
 15 -6 -2 24.84 26.03
 15 6 2 13.07 9.77
 -15 6 2 -1.87 15.12
 -15 -6 2 12.51 19.12
 15 6 2 28.03 18.5
 15 6 -2 20.54 10.78
 -15 6 2 26.69 18.89
 -15 6 -2 18.22 7.89
 -15 6 2 23.53 14.43
 15 6 -2 -1.04 19.12
 15 -6 -2 33.27 33.74
 15 6 2 11.87 10.46
 15 6 -2 35.22 14.99
 -15 -6 -2 21.44 12.46
 -15 -6 -2 18.26 10.24
 -15 6 2 19.49 8.73
 -15 -6 2 23.01 13.61
 16 6 2 164.54 38.1
 -16 -6 -2 127.8 31.12
 -16 -6 2 220.49 38.29
 16 6 2 164.86 39.68
 -16 6 -2 183.19 38.03
 16 6 -2 247.85 37.84
 16 6 2 162.55 40.5
 -16 6 2 166.46 31.54
 -16 6 -2 170.97 33.49
 -16 -6 -2 179.24 35.87
 16 6 -2 254.07 39.61
 -16 -6 -2 126.46 30.92
 16 6 2 176.43 47.39
 16 6 2 131.51 29.28
 -16 6 -2 115.09 28.43
 16 6 -2 250.64 42.01
 16 6 2 168.84 34.01
 -16 -6 -2 141.64 32.35
 16 6 -2 262.39 41
 16 6 -2 298.6 55.38
 16 6 2 157.39 34.59
 -16 6 -2 125.25 38.84
 -16 6 2 229.78 52.5
 -16 6 -2 123.68 34.96
 -16 6 2 195.41 35.92
 16 6 -2 245.59 41.29
 16 6 2 144.07 34.76
 -16 6 -2 152.76 31.81
 -16 6 2 194.43 36.82
 -16 -6 2 212.5 35.81
 -16 6 2 190.65 36.35
 17 6 2 15.36 15.22
 17 6 2 21.08 13.36
 -17 -6 2 22.63 11.09
 17 6 -2 9.49 5.35
 -17 6 -2 11.54 10
 -17 6 2 15.24 9.49
 17 6 2 30.94 14.64
 -17 6 -2 22.08 15.13
 -17 6 -2 5.28 4.4
 -17 -6 -2 21.59 11.48
 17 6 2 -2.68 8.23
 -17 6 -2 20.11 15.59
 -17 -6 -2 9.74 7.04
 -17 -6 -2 20.59 14.64
 17 6 -2 3.97 3.47
 17 6 2 -19.95 11
 17 6 -2 16.38 16.91
 -17 6 -2 19.59 9.83
 17 6 2 9.28 6.22
 17 6 -2 12.94 8.04
 17 6 2 8.91 6.96
 -17 6 2 3.41 10.42
 -17 6 -2 1.34 5.31
 -17 6 2 -1.46 8.24
 17 6 -2 26.16 13.84
 -17 -6 -2 7.01 8.53
 17 6 2 3.85 6.91
 -17 6 2 1.4 4.62
 -17 6 2 12.72 10.56
 -17 -6 2 21.82 13.16
 18 6 2 17.95 15.77
 -18 -6 -2 4.88 8.54
 -18 6 -2 8.29 12
 -18 6 2 19.07 10.54
 18 6 -2 8.11 8.06
 18 6 2 -6.53 9.69
 -18 -6 2 -1.84 7.06
 -18 6 -2 1.77 7.22
 -18 6 -2 21.43 12.54
 -18 6 -2 4.01 8.52
 18 6 2 5.58 10.14
 -18 6 -2 17.87 11.5
 -18 -6 -2 7.97 7.1
 -18 6 2 7.9 10.21
 18 6 2 8.93 11.06
 18 6 2 9.9 3.36
 18 6 -2 19.93 15.87
 18 6 -2 2.47 4.15
 -18 -6 -2 7.27 4.32
 18 6 2 4.31 8.95
 -18 6 -2 6.74 11.26
 18 6 -2 13.51 10.58
 18 6 -2 4.89 9.42
 -18 -6 -2 3.79 5.35
 18 6 2 24.59 15.05
 -18 6 2 13.83 11.05
 -18 6 2 12.74 11.43
 -18 -6 2 10.94 8.18
 -19 -6 -2 -1.38 7.46
 -19 6 -2 -3.47 12.08
 -19 -6 -2 -3.25 9.09
 -19 -6 2 -7.07 10.83
 -19 6 2 -2.88 7.65
 -19 6 -2 9.97 8.63
 19 6 -2 -8.06 9.96
 19 6 2 5.44 5.51
 19 6 -2 3.88 7.26
 -19 6 -2 7.17 7.56
 19 6 -2 3.46 7.6
 19 6 2 8.05 9.01
 19 6 2 1.58 4.62
 -19 6 -2 19.61 16.35
 -19 6 2 -2.53 1.78
 19 6 2 -11.19 8.17
 -19 6 -2 -9.78 13.67
 -19 -6 -2 1.93 3.02
 19 6 -2 22.11 19.28
 19 6 2 -2.77 9.51
 -19 6 -2 1.24 9.33
 -19 6 2 3.33 5.51
 19 6 -2 -0.88 2.98
 -19 -6 -2 -1.18 5.17
 19 6 2 -2.96 9.69
 -19 6 2 5.79 4.15
 -19 -6 2 -8.06 7.88
 -20 -6 2 89.25 23.4
 -20 -6 -2 56.78 21.55
 -20 6 -2 71.72 24.26
 20 6 -2 119.06 28.99
 -20 6 2 110.56 26.84
 -20 6 -2 75.24 24.51
 20 6 2 76.16 23.74
 20 -6 -2 91.69 30.63
 -20 6 -2 78.08 25.43
 -20 -6 -2 67.96 24.75
 -20 -6 2 105.3 25.38
 20 6 2 75.05 24.37
 -20 -6 -2 82.99 25.05
 20 6 -2 107.06 27.63
 20 6 2 73.63 26.19
 20 6 -2 136.5 40.84
 -20 6 2 73.87 23.55
 -20 -6 2 79.27 23.73
 -20 6 -2 105.49 28.64
 20 6 2 50.5 25.35
 -20 6 -2 78.51 26.63
 20 6 -2 78.78 22.77
 -20 -6 -2 49.1 19.95
 20 6 -2 85.08 25.45
 20 6 2 64.77 22.37
 -20 6 2 101.12 27.96
 -20 6 2 106.17 28.64
 -20 -6 2 80.94 23.4
 21 6 -2 12.19 4.13
 -21 6 -2 11.14 10.57
 -21 -6 -2 15.05 9.35
 21 6 -2 19.82 12
 -21 6 -2 7.88 9.24
 -21 6 -2 15.36 9.58
 -21 -6 -2 15.31 13.18
 21 6 -2 28.66 14.16
 21 6 2 14.75 9.52
 21 -6 -2 25.32 12.14
 -21 -6 2 26.54 12.61
 -21 6 2 15.93 9.61
 21 6 2 10.07 5.74
 21 6 2 2.02 8.27
 -21 6 -2 24.79 16.69
 -21 6 2 24.63 14.98
 -21 -6 -2 22.59 12.44
 21 6 -2 29.22 18.74
 21 6 2 6.79 9.65
 -21 6 2 18.54 11.34
 -21 6 -2 -0.06 9.06
 -21 6 2 16.73 10.26
 -21 -6 2 23.33 10.31
 -21 -6 -2 13.37 8.66
 -21 -6 -2 12.77 11.82
 21 6 -2 27.64 13.76
 21 6 2 33.92 17.04
 -21 6 2 23.58 14.75
 -21 -6 2 13.9 9.56
 -21 -6 2 15.14 9.99
 22 6 2 209.16 43.52
 22 6 2 197.06 51.22
 -22 6 -2 238.04 43.59
 22 6 -2 357.03 52.29
 -22 6 2 359.11 46.97
 -22 6 -2 291.67 46.79
 -22 6 -2 305.49 47.69
 -22 -6 2 309.86 47.43
 -22 6 2 320.43 48.26
 -22 6 2 269.54 44.34
 22 6 -2 319.28 49.39
 -22 -6 -2 280.07 48.42
 22 6 2 229.68 44.96
 22 6 2 300.35 47.17
 -22 -6 -2 240.07 45.74
 22 -6 -2 170.93 39.16
 -22 6 2 361.19 60.42
 22 6 -2 428.19 72.18
 22 6 -2 328.57 48.45
 -22 -6 -2 380.03 55.46
 -22 -6 -2 271.82 44.61
 -22 6 -2 307.53 54.06
 -22 -6 2 438.56 50.82
 22 6 -2 353.77 54.28
 22 6 2 255.05 48.14
 -22 -6 2 298.16 44.51
 -22 6 2 412.51 55.35
 -22 -6 2 307.07 47.02
 -22 -6 -2 169.67 31.45
 23 6 2 0.44 9.48
 -23 -6 2 -2.3 8.65
 -23 -6 -2 -4.11 3.68
 -23 6 -2 -2.57 11.61
 23 6 2 -1.63 8.32
 23 6 2 -3.81 6.79
 -23 -6 -2 -11.95 13.54
 23 -6 2 -6.09 7.2
 23 6 -2 2.35 8.97
 23 -6 -2 -9.21 8.02
 -23 -6 2 7.89 7.44
 -23 -6 -2 2.77 6.03
 23 6 -2 -5.38 11.67
 -23 6 2 -14.74 11.23
 -23 6 -2 4.79 5.7
 23 6 -2 12.71 6.96
 23 6 2 -3.54 11.57
 -23 6 -2 4.46 8.26
 23 6 -2 2.36 6.12
 -23 6 2 18.85 14.43
 -23 6 2 11.52 11.09
 -23 -6 2 9.54 9.36
 -23 -6 -2 -2.04 7.25
 23 6 -2 -4.88 9.85
 23 6 2 -8.93 7.87
 -23 6 2 1.42 5.35
 -23 -6 2 2.35 5.54
 -23 -6 -2 4.8 8.75
 24 6 2 158.16 35.59
 -24 6 2 171.64 35.33
 -24 -6 -2 184.41 38.02
 -24 6 -2 213.83 39.13
 -24 6 -2 212.44 38.86
 -24 -6 2 215.62 38.7
 24 6 2 137.26 41.33
 24 6 -2 217.28 38.68
[truncated: 781,898 more chars]
